# Supplementary material for: Phylogenomic Analysis of “Red” Genes from Two Divergent Species of the “Green” Secondary Phototrophs, the Chlorarachniophytes, Suggests Multiple Horizontal Gene Transfers from the Red Lineage before the Divergence of Extant Chlorarachniophytes
Source: PubMed Central journal article supplement (PMC4074131; doi:10.1371/journal.pone.0101158), 2014-06-27
Supplement: pone.0101158.s001.pdf [file pone.0101158.s001.pdf]

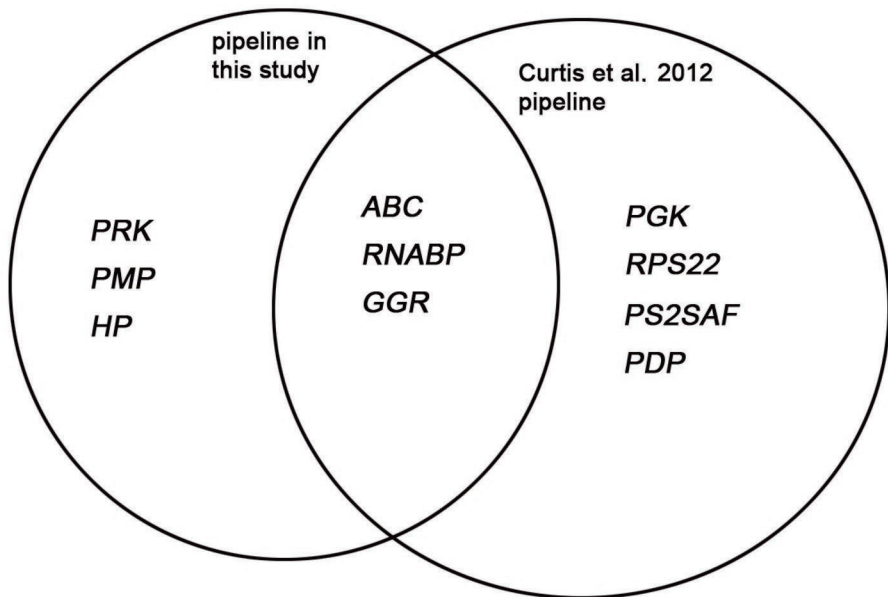

Figure S1
