# Supplementary material for: Phylogenomic Analysis of “Red” Genes from Two Divergent Species of the “Green” Secondary Phototrophs, the Chlorarachniophytes, Suggests Multiple Horizontal Gene Transfers from the Red Lineage before the Divergence of Extant Chlorarachniophytes
Source: PubMed Central journal article supplement (PMC4074131; doi:10.1371/journal.pone.0101158), 2014-06-27
Supplement: pone.0101158.s004.pdf [file pone.0101158.s004.pdf]

Alignment: ABC

|    |                              |            |            |            |             |            |
|----|------------------------------|------------|------------|------------|-------------|------------|
| 11 | Micromonas_sp__RCC299_Eukary | FDRKSVGTFV | RTLEIWGFVF | NFLFRRVALN | LKFTKGGTEA  | KLERTEALAK |
| 23 | Ostreococcus_tauri_Eukaryota | IERKSIGTIA | RSFEIWSFVA | AFVFRRVFIG | VKASDSSWPA  | G----ESL-- |
| 09 | Volvox_carteri_f__nagariensi | WSQKTYSVFQ | RTFEIWSFAF | QFAWRYVLLN | QKFTKEGVPE  | ASARKKELAI |
| 60 | Chlamydomonas_reinhardtii_Eu | WSQKTYSTFQ | RTYEIWSFAF | QFAWRYALLG | QKVMAALRCT  | LGACRAQAGT |
| 05 | Selaginella_moellendorffii_E | WNRKAYSTLQ | RSLEIWAFFV | SFLFKQWLLG | RKFMKGGTEE  | KMERRKRLAK |
| 02 | Physcomitrella_patens_subsp_ | WNKKTYSTIQ | RSLEIWGFVF | TFLFKWWLLN | QKFMKGGTEL  | KQEKRKVLAK |
| 03 | Ryza_sativa_Japonica_Group_  | WNRKTYSTIQ | RTLEIWGFVF | KFIFRSWLLN | QKFTRGGTEE  | KVMRRKVLAK |
| 20 | Gloeobacter_violaceus_PCC_74 | WNRVNYSRTR | RVIDIWGFFL | LILFYRWWD  | KKWTRSGSEE  | NSRRQRMRAI |
| 35 | Synechococcus_sp__PCC_7502_B | WSRDNYSPLA | RSIDIWRTML | TLVLYSWLDA | RAWSVGGTPE  | KQKRRRSRAI |
| 37 | Synechococcus_elongatus_PCC_ | WDRRRYPRWQ | RSADIWRFVL | LLSFRLWLIQ | RPWTFGGSSD  | RNQRRLKLAS |
| 28 | Synechococcus_sp__JA-3-3Ab_B | WARENYTRWG | RLIDIWRFVL | TWLFYLVLDQ | QAWSGGQTAE  | RAKRRRARAI |
| 40 | Chamaesiphon_minutus_PCC_660 | WNRTNYSKRR | RTIDIWSFFL | TFLSSSWIDG | KKWSINGTEA  | KAARRRKQAI |
| 29 | Synechococcus_sp__PCC_7335_B | WNGTYSRPQ  | RFIDIWSFVL | KLLAKRWLYG | KAWSGGKTPE  | KTKRRKDMAV |
| 30 | Leptolyngbya_sp__PCC_7375_Ba | WNR-RYSRPE | RFVDIWSFFL | SFLGKRWLYN | KSWSAGGSPE  | KAARRRAQAR |
| 26 | Microcystis_aeruginosa_PCC_9 | WNRESYSINR | RRLDIWRFVL | TVLYQFWLNG | KKWSNGGSQE  | KAGRRRKQAA |
| 16 | Stanieria_cyanosphaera_PCC_7 | WNRENYSRTR | RRIDIWIFVF | TLLFKFWRNG | KKWSSGGTEE  | KAQRRKAQAI |
| 27 | Gloeocapsa_sp__PCC_73106_Bac | WNQENYSRNR | RRFDIWFVFS | TLLFKLWRNG | RKWSSEGGSEE | KIARRQIQAV |
| 18 | Cyanothece_sp__PCC_7822_Bact | WNRENYSVNR | RRFDIWRFVL | LLLLKLTLNG | KKWSIGGTEE  | KTDRRKKQAV |
| 14 | Pleurocapsa_sp__PCC_7327_Bac | WNQENYSINR | RRFDIWFIL  | LLLLKLWLN  | KKWSKGEEA   | KFQRRKVQAA |
| 39 | Leptolyngbya_sp__PCC_6406_Ba | WSRRRYSRSR | RTIDIWSFVL | RLLGARWLYG | KAWSGGTTPE  | KAQRRRQQAV |
| 33 | Geitlerinema_sp__PCC_7407_Ba | WNRERYSRPR | RFIDIWTFVW | LFLGSLWLLN | KAWSRGGTDA  | KAARRRAQAI |
| 31 | Crinalium_epipsammum_PCC_933 | WNRENYSRHR | RFVDIWGFVF | TLMTGTWLN  | KSWSQGGTEA  | KAKRRKQAI  |
| 21 | Moorea_producens_3L_Bacteria | WNQENYSRQR | RFIDIWRFVL | TLMTGLWLDG | KPWSRGGTEQ  | KAYRRKTQAI |
| 24 | Calothrix_sp__PCC_6303_Bacte | WNRENYSRNR | RFVDIWSFVL | TLMFRLWLYG | KSWSPPGGTEI | KSARRRKYAV |
| 22 | Gloeocapsa_sp__PCC_7428_Bact | WNRENYSRNR | RFVDIWLFI  | RLLAGFWYNN | KSWSGGTDA   | KSARRKRQAI |
| 32 | Chroococciopsis_thermalis_   | WNRENYSRQR | RFVDIWMFVL | TLLFGLWLDG | KAWSPGGTEA  | RIARRKKQAI |
| 25 | Raphidiopsis_brookii_D9_Bact | WNREKYSSKR | RFVDIWSFVL | TFMFKLWRYN | KAWSPGGTEA  | KAARRYAQAV |
| 17 | Rivularia_sp__PCC_7116_Bacte | WNRKNYSRNR | RFVDIWSFVL | TLMLRLWLYN | KSWSRGGTET  | KAARRKWQAI |
| 19 | Fischerella_sp__JSC-11_Bacte | WNRENYSRNR | RFVDIWSFVL | TLLYRLWLYN | KSWSAGGTEA  | KAARRKVLAV |
| 34 | Cyanothece_sp__PCC_7425_Bact | WNRERYSRIR | RFIDIWSFVL | QFLGGRWLLR | QPWSWGGTEA  | KTARRRAQAI |
| 36 | Scillatoriales_cyanobacteri  | WNRENYSRQR | RFIDIWMFVL | ALLYAQWLYN | KPWSRGGTEA  | KQKRRRSQAI |
| 13 | Volvox_carteri_f__nagariensi | -MQDNYNATQ | RNIDTWLFFT | LFRSRLWLLD | QKWSPPGGTEA | KGQRAKGLAR |
| 10 | Arabidopsis_lyrata_subsp__ly | WADENYSSLQ | RSIDVVSFVI | SLRIRVLFDN | AKWAVGGTEE  | KKSRRRETAS |
| 12 | Physcomitrella_patens_subsp_ | WARDDYSTTQ | RQIDVVSFVL | TLRARVWFLD | SKWTLGGTEE  | KKARRRSLAV |
| 15 | Selaginella_moellendorffii_E | WSKENYSKLQ | RTIDVVSFVL | SLRAKLFLID | AKWSVGGSEE  | KISRRRSIAV |
| 04 | Phaeodactylum_tricornutum_CC | GKWRKWAILR | RSAEIWAYFS | SFYIKDRRIS | AKYNSGASEE  | KKAERSQLGK |
| 08 | Thalassiosira_pseudonana_CCM | -----WATFR | RSAEIWFYFS | SFYIKDTWIL | KNYDSGRSED  | RKEERGKLG  |
| 01 | QUERY_Bigel_abc_86002        | WQMFGGNKYS | RTVEIWAFLI | SA---ELKLR | KV---KDPEE  | KSLKRMEYAE |

|                                |            |            |             |            |            |
|--------------------------------|------------|------------|-------------|------------|------------|
| 463Emiliana_huxleyi_Localdb__  | WESAQGSALK | RTLEVWAFLA | SAALKVLKAS  | K--AKGGPEA | ASAAKTAAAE |
| 06Thalassiosira_pseudonana_CCM | ----NASALR | RNAEVWKFAL | KCVFKALRAR  | KLTKAGADEA | TSASKVEAAT |
| 07Phaeodactylum_tricornutum_CC | WELANSSSIV | RNAEVWKFAL | ASVFRVLKPR  | KMKAKGASEE | EKKAQTEAAE |
| 283Aureococcus_anophagefferens | --RRRLWAAG | RTASIWRTAV | SFGWRVARQR  | RKFADKQSAD | AVAARGALAA |
| 83Porphyridium_cruentum_Eukary | -----      | -----      | -----       | -----      | -----      |
| 295Ectocarpus_siliculosus_Loca | WNKGYGSAIS | RSVEVWIFGA | KMLFKEIKLR  | KV---EDAAE | KSQKRSIAIV |
| 537Pyropia_zezoensis_Localdb__ | -----      | -----      | -----RLK    | R-----     | -----      |
| 75Cyanidioschyzon_merolae_Euka | WARGFGSPAS | RAVEIWSFAL | HQVWMEMLRLR | RV---QDSKQ | RAALRRRNAR |

51

|                                  |            |            |             |            |            |
|----------------------------------|------------|------------|-------------|------------|------------|
| 11Micromonas_sp_RCC299_Eukary    | WLRLGLLRLG | PTFIKIGQQF | STRVDVLSKP  | FIRELEKLQD | RVPPFPPTMA |
| 230Streptococcus_tauri_Eukaryota | ----YFDSG  | PTFIKVGQQF | STRVDVLSPQ  | FIRELEKLQD | RVPPFPPTMA |
| 09Volvox_carteri_f_nagariensi    | WLREGLVRLG | PTFIKIGQQF | STRVDVLSPE  | FVKELEKLQD | NVPPFDREAA |
| 60Chlamydomonas_reinhardtii_Eu   | WTRQGVTRTP | PRFIKIGQQF | STRVDVLSPE  | FVKELEKLQD | NVPPFDREAA |
| 05Selaginella_moellendorffii_E   | WLKEGLLRLG | PTFIKIGQQF | STRSDILPKE  | YVDELAELQD | QVPPFESEVA |
| 02Physcomitrella_patens_subsp_   | WLKEGLLRLG | PTFIKIGQQF | STRVDILAKE  | YVDELAELQD | QVPPFSSETA |
| 03Oryza_sativa_Japonica_Group_   | WLKESILRLG | PTFIKIGQQF | STRVDILPQE  | YVDQLSELQD | QVPPFPSETA |
| 20Gloeobacter_violaceus_PCC_74   | WTRETMLELG | PTFIKVGQLF | STRADLFPKE  | YIEELSRLQD | EVPAFPYEQV |
| 35Synechococcus_sp_PCC_7502_B    | WLRESMLQLG | PTFIKVGQLF | STRADLFPAE  | YVEELSKLQD | RVPAFSYEIA |
| 37Synechococcus_elongatus_PCC_   | WIRETCLDLG | PTFIKVGQLF | STRADLFPAE  | YVEELSKLQD | QVPAFDLEQV |
| 28Synechococcus_sp_JA-3-3Ab_B    | WIRETLLHLG | PTFIKVGQFF | STRADLFPSE  | YVEELSKLQD | RVPAFGYEQV |
| 40Chamaesiphon_minutus_PCC_660   | WIRDTFLELG | PTFIKLGQLF | STRADLFPVE  | YVEELSKLQD | RVPAFSYAQV |
| 29Synechococcus_sp_PCC_7335_B    | WIRETCLSLG | PTFIKIGQLF | STRADLFPPIE | YVEELAKLQD | RVPAFSYEKV |
| 30Leptolyngbya_sp_PCC_7375_Ba    | WIRLTFNLG  | PTFIKLGQLF | STRSDLFPTE  | YVEELSKLQD | QVPAFSYEQV |
| 26Microcystis_aeruginosa_PCC_9   | WIRETMLELG | PTFIKVGQLF | STRADLFPLE  | YVEELSKLQD | QVPAFTYEQA |
| 16Stanieria_cyanosphaera_PCC_7   | WIRESLLELG | PTFIKVGQLF | STRADLFPSE  | YVEELAKLQD | RVPAFAYEQV |
| 27Gloeocapsa_sp_PCC_73106_Bac    | WIRKSILELG | PTFIKVGQLF | STRADLFPKE  | YVEELSKLQD | QVPAFSYEQA |
| 18Cyanotheca_sp_PCC_7822_Bact    | WIRESLLELG | PTFIKVGQLF | STRADLFPSE  | YVEELSKLQD | QVPAFTYEQV |
| 14Pleurocapsa_sp_PCC_7327_Bac    | WIRESLLELG | PTFIKVGQLF | STRADLFPAE  | YVEELAKLQD | QVPAFTYEQV |
| 39Leptolyngbya_sp_PCC_6406_Ba    | WIRETLLDLG | PTFIKVGQLF | STRADLFPAE  | YVEELSKLQD | RVPAFSYEQA |
| 33Geitlerinema_sp_PCC_7407_Ba    | WVRETFLDLG | PTFIKVGQLF | STRADIFPIE  | YVEELSKLQD | RVPAFSFEQV |
| 31Crinalium_epipsammum_PCC_933   | WIRETLLDLG | PTFIKVGQLF | STRADLFPSE  | YVEELTKLQD | QVPAFSYEQV |
| 21Moorea_producens_3L_Bacteria   | WIRDTFDLG  | PTFIKVGQLF | STRADLFPSE  | YVEELSKLQD | RVPAFSYEQV |
| 24Calothrix_sp_PCC_6303_Bacte    | WIRNTMLDLG | PTFIKVGQLF | STRADIFPAE  | YVEELSKLQD | RVPAFSYEIV |
| 22Gloeocapsa_sp_PCC_7428_Bact    | WIRNKLLDLG | PTFIKVGQLF | STRADLFPSE  | YVEELAKLQD | KVPAFSYAQV |
| 32Chroococcidiopsis_thermalis_   | WIRNTLLDLG | PTFIKVGQLF | STRADLFPGE  | YVEELAKLQD | RVPAFGYEQV |
| 25Raphidiopsis_brookii_D9_Bact   | WVRNTFLDLG | PTFIKVGQLF | STRADIFPSE  | YVDELSKLQD | RVPAFDYEQV |
| 17Rivularia_sp_PCC_7116_Bacte    | WIRNTLLDLG | PTFIKVGQLF | STRADIFPSE  | YVEELAKLQD | KVPAFSYEQV |
| 19Fischerella_sp_JSC-11_Bacte    | WIRNTLLDLG | PTFIKVGQLF | STRADIFPSE  | YVEELSKLQD | KVPAFTYEQV |
| 34Cyanotheca_sp_PCC_7425_Bact    | WVRETFLDLG | PTFIKVGQLF | STRADLFPAE  | YVEELTKLQD | KVPAFAYEQI |

|    |                              |             |            |            |            |            |
|----|------------------------------|-------------|------------|------------|------------|------------|
| 36 | scillatoriales_cyanobacteri  | WIRDTLDDL   | PTFIKVGQLF | STRSDLFPSE | YVEELSKLQD | KVPAFSYEQA |
| 13 | Volvox_carteri_f_nagariensi  | YLLNSVLQLG  | PTFIKIGQLS | STRSDLLPAE | FVEELSTLQD | RVPFAAASKA |
| 10 | Arabidopsis_lyrata_subsp_ly  | WLRESVLQLG  | PTFIKLGQLS | STRSDLFPRE | FVDELSKLQD | RVPAFSPEKA |
| 12 | Physcomitrella_patens_subsp_ | WVREKILQLG  | PTFIKLGQLS | STRSDLFPAE | IVEELAKLQD | RVPAFSAGKA |
| 15 | Selaginella_moellendorffii_E | WVKETILQLG  | PTFIKLGQLF | STRSDLFPAE | FVEELAKLQD | RVPAFSPEKA |
| 04 | Phaeodactylum_tricornutum_CC | EITQNLLKLG  | PTFIKVGQLF | STRIDIVPKE | YIEELKQLQD | NVPAFSGDLA |
| 08 | Thalassiosira_pseudonana_CCM | QLTQNLLKLG  | PTFIKLGQIF | STRIDIVPKE | YIESLKLQD  | NVPAFSGEKA |
| 01 | QUERY_Bigel_abc_86002        | DLCRGLLRLG  | PTFIKLGQLL | STRRDVLTPE | YIKALERLQD | DVPGFTGSKA |
| 46 | Emiliana_huxleyi_Localdb__   | FIRDSLFLKLG | PTFVKLGQVV | STRTDVLEKE | YIEVLRDLQD | NVPGFGGAKA |
| 06 | Thalassiosira_pseudonana_CCM | FIRDGLLRLG  | PTFVKLGQVV | STRTDVLPVE | YTDVLTQLQD | DVPGFSGKRA |
| 07 | Phaeodactylum_tricornutum_CC | FIRDGLLKLG  | PSFVKLGQVI | STRTDVLPPT | YTDVLTQLTD | DVPGFSGERA |
| 28 | Aureococcus_anophagefferens  | LFRDALLDLG  | PTFIKFGQLL | STRVDVLPPE | VIAELATLQN | EVPCFSTARA |
| 83 | Porphyridium_cruentum_Eukary | -----       | -----      | -----      | -----      | -----      |
| 29 | Ectocarpus_siliculosus_Loca  | QLKDGLLRLG  | PTFIKLGQLL | STRIDVVPKE | YIKELVMLQD | NVPGFPFESA |
| 53 | Pyropia_zezoensis_Localdb__  | ----GLLALG  | PTFIKLGQLL | STRIDVLPRE | YIEELVDLQD | RVPGFSAADA |
| 75 | Cyanidioschyzon_merolae_Euka | ALKEGLLRLG  | PTFIKLGQLA | STRVDLFPRE | YIEELVSLQD | RVPPFNIRVV |

101

|    |                               |             |             |            |            |             |
|----|-------------------------------|-------------|-------------|------------|------------|-------------|
| 11 | Micromonas_sp_RCC299_Eukary   | KQIIEEELGK  | PIDEVYTDFFQ | DEALAAASLG | QVHLAKLKGE | QVIVKVQRPG  |
| 23 | Streptococcus_tauri_Eukaryota | KEIIQQELGG  | PVESFFDDFE  | DTPLAAASLG | QVHRANMKGE | QVIIVKVQRPG |
| 09 | Volvox_carteri_f_nagariensi   | RSILEASLGK  | PVEEVFEFE   | MEPIAAASLG | QVHLARLRGQ | RVVVKVQRPG  |
| 60 | Chlamydomonas_reinhardtii_Eu  | RAKLEASLGK  | KVEEVFDEFE  | SEPIAAASLG | QVHLAKLRGQ | RVVVKVQRPG  |
| 05 | Selaginella_moellendorffii_E  | VSILEEELGC  | SVDQVFEKFD  | RDPIAAASLG | Q-----     | -----IQRPG  |
| 02 | Physcomitrella_patens_subsp_  | VQIVVEELGR  | PVDVIFDRFD  | RDPIAAASLG | QVHRAKLRGK | EIVVKVQRPG  |
| 03 | Oryza_sativa_Japonica_Group   | VSIIEEELGA  | SVNKIFDRFD  | FEPIAAASLG | QVHRAKLRGK | EVVVKVQRPG  |
| 20 | Gloeobacter_violaceus_PCC_74  | VEIVEDQFGK  | PIPQVFQFFD  | PTPIAAASLG | QVHRAQLHGE | DVVVKVQRPG  |
| 35 | Synechococcus_sp_PCC_7502_B   | QQITETDLGK  | SLDQMYQYFD  | PVPIAAASLG | QVHKARLHGE | EVVVKVQRPG  |
| 37 | Synechococcus_elongatus_PCC_  | QQILSNELGA  | SPEELFSDFD  | PVPLAAASLG | QVHRARLKGE | AVVVKVQRPG  |
| 28 | Synechococcus_sp_JA-3-3Ab_B   | AAIVQQELGK  | PIEQIYSYFD  | PTPLAAASLG | QVHRAKLRGK | EVVVKVQRPG  |
| 40 | Chamaesiphon_minutus_PCC_660  | EIIEERDLGK  | KIPELFAYFD  | PTPLAAASLG | QVHLARLYGE | DVVVKVQRPG  |
| 29 | Synechococcus_sp_PCC_7335_B   | KSTIEDDFGR  | PLAELYKSFE  | PVPIAAASLG | QVHCAELHGE | EVVVKVQRPG  |
| 30 | Leptolyngbya_sp_PCC_7375_Ba   | KSIIEDDLGR  | PIGELYRTFD  | PIPLAAASLG | QVHRAQLHGE | EIVVKVQRPG  |
| 26 | Microcystis_aeruginosa_PCC_9  | SKIIEVSLGK  | PLNKLKFSFD  | PIPLAAASLG | QVHRAQLNGE | DVVVKVQRPG  |
| 16 | Stanieria_cyanosphaera_PCC_7  | AAIIEKDLGK  | PIGQLFHKFD  | PTPLAAASLG | QVHKAQLHGE | EVVVKVQRPG  |
| 27 | Gloeocapsa_sp_PCC_73106_Bac   | SAIVQTDLTK  | SIPELFLNFE  | PIPLAAASLG | QVHKAQLQGE | EVVVKVQRPG  |
| 18 | Cyanothece_sp_PCC_7822_Bact   | EKIIEKADLTK | PISKLFKRSFD | PSPIAAASLG | QVHKAQLHGE | EVVVKVQRPG  |
| 14 | Pleurocapsa_sp_PCC_7327_Bac   | VAIVEADLTK  | PMNKLFRHFD  | PVPIAAASLG | QVHKAQLHGE | EVVVKVQRPG  |
| 39 | Leptolyngbya_sp_PCC_6406_Ba   | QEIVEADLTK  | RIPDLFRSFD  | PIPLAAASLG | QVHRAQLHGE | EVVVKVQRPS  |
| 33 | Geitlerinema_sp_PCC_7407_Ba   | QRIIEEDLTK  | PVSNLQNF    | QIPIAAASLG | QVHKAQLHGE | TVVVKVQRPG  |
| 31 | Crinalium_epipsammum_PCC_933  | ERIEEQDLTK  | KVSKLFRSFD  | PVPLAAASLG | QVHKAQLHDE | EVVVKVQRPG  |

|    |                               |            |            |             |             |             |
|----|-------------------------------|------------|------------|-------------|-------------|-------------|
| 21 | Moorea_producens_3L_Bacteria  | EQIIQEDLGK | PIKELFSGFD | PIPLAAASLG  | QVHKAQLRGE  | EVAIKVQRPG  |
| 24 | Calothrix_sp__PCC_6303_Bacte  | EAIVEKELDK | KIPELFQDFE | QIPLAAASLG  | QVHKAVLHGE  | SVVVVKVQRPG |
| 22 | Gloeocapsa_sp__PCC_7428_Bact  | ETIIEQELGK | KLPELFTSFE | PIPIAAAASLG | QVHKAQLHGE  | IVVVVKVQRPG |
| 32 | Chroococcidiopsis_thermalis_  | ETTVERELGK | KIPELFHSFE | PIPLAAASLG  | QVHKAKLRGE  | EVVVKIQRPG  |
| 25 | Raphidiopsis_brookii_D9_Bact  | AKIIEQELGK | TIAELFASFE | PIPLAAASLG  | QVHKAELHGE  | TVVVVKVQRPG |
| 17 | Rivularia_sp__PCC_7116_Bacte  | EIIIEYELGK | KIPELFASFE | PVPLAAASLG  | QVHKAVLHGE  | AVVVVKIQRPG |
| 19 | Fischerella_sp__JSC-11_Bacte  | ETIIDQELGK | KIPELFASFE | PIPLAAASLG  | QVHKAVLRGE  | AVVVVKVQRPG |
| 34 | Cyanothece_sp__PCC_7425_Bact  | EAILLQDFGK | TIPELYRSFD | PIPLAAASLG  | QVHKAQLHGE  | EVVVKVQRPG  |
| 36 | scillatoriales_cyanobacteri   | KAIIEQDLGK | PLQELYRNF  | PIPIAAAASLG | QVHRAQLHGE  | EVVVKVQRPG  |
| 13 | Volvox_carteri_f__nagariensi  | ISIIEKDLGR | PISQLFASFD | QRPIAAAASLG | QVHRAVLFGE  | EVVVKVQRPG  |
| 10 | Arabidopsis_lyrata_subsp__ly  | KRFIEAELGA | PISVMFKEFE | EQPIAAAASLG | QVHRAVLHGE  | KVVVKVQRPG  |
| 12 | Physcomitrella_patens_subsp__ | MAFIEKELGA | PVDALFADFE | RQPIAAAASLG | QVHRAILPGE  | RVVVVKVQRPG |
| 15 | Selaginella_moellendorffii_E  | ELMIENELDT | PMQVLFSEFE | RQPLAAASLG  | QVHRAVLRGE  | QVVVKIQRPG  |
| 04 | Phaeodactylum_tricornutum_CC  | VRIIEEELGK | PIDQLFDEFD | RKSLAAASLG  | QVHIAR-KDE  | MLAIKVQRQY  |
| 08 | Thalassiosira_pseudonana_CCM  | QEIEEAELGK | PINELFDTFN | IEPLAAASLG  | QVHIAT-KDE  | TYAVKIQRQF  |
| 01 | QUERY_Bigel_abc_86002         | KAIIEEDFGK | PIDEIFQSFD | ETPIAAAASLG | QVHKAVLKGQ  | EVAVKIQRQG  |
| 46 | Emiliana_huxleyi_Localdb__    | MEIVGRELGA | PVEEVFDSFE | EEPIAAAASLG | QVHRAVYKGM  | PVAVKVQRAG  |
| 06 | Thalassiosira_pseudonana_CCM  | KDIVSKELDL | PCDDVFTNFS | EEPLAAASLG  | QVHTAMYK GK | KVAIKVQRAG  |
| 07 | Phaeodactylum_tricornutum_CC  | KEIVEKELGK | PVDQVFTDFS | AKPLKAASLG  | QVHTATYK GK | KVAIKVQRSG  |
| 28 | Aureococcus_anophagefferens   | VAIVKEELGN | KLDEVFASFD | ATPLAAASLA  | QVHRATLKGT  | EVVVKVQRDG  |
| 83 | Porphyridium_cruentum_Eukary  | -----      | -----      | -----       | -----       | -----       |
| 29 | Ectocarpus_siliculosus_Loca   | KRIIEEDLGQ | PLEELYETVS | EVPLAAASLG  | QVHLAKIKGE  | QVAVKVQRAG  |
| 53 | 7Pyropia_yezoensis_Localdb__  | IATVERELGQ | PLALLFDTFE | EVPLAAASLG  | QVHRATLDGE  | ALAVKVQRAG  |
| 75 | Cyanidioschyzon_merolae_Euka  | RQIIREDLGR | DIEELFDTFE | EEPMAAASLG  | QVHKARINGQ  | DVAVKVQRAG  |

151

|    |                               |            |            |            |             |            |
|----|-------------------------------|------------|------------|------------|-------------|------------|
| 11 | Micromonas_sp__RCC299_Eukary  | LKEIFDIDLK | NLRVIAQWLQ | KDPKTGAARD | WVAIFDETAR  | CLYDEVQYQN |
| 23 | 0streococcus_tauri_Eukaryota  | LKEIFDIDLK | NLRVIAKWLQ | KDPKNGAKRD | WVAIFDETAR  | VLYDEVQYTN |
| 09 | Volvox_carteri_f__nagariensi  | LKDLFDIDLK | NIRALAVWLQ | KDPKTGAARD | WVAIYDECSR  | ILYQEIDYRL |
| 60 | Chlamydomonas_reinhardtii_Eu  | LKDLFDIDLK | NIRALAVWLQ | KDPKTGAARD | WVAIYDECSR  | ILYQEIDYRE |
| 05 | Selaginella_moellendorffii_E  | LKALFDIDLK | NLRVIAENLQ | KDPKSGAKRD | WVAIYDECAN  | VLYQEIDYNR |
| 02 | Physcomitrella_patens_subsp__ | LKALFDIDLK | NLRVIAQNLQ | KDPKSGAKRD | WVAIYDECAN  | VLYEEIDYTK |
| 03 | Ryza_sativa_Japonica_Group__  | LKELFDIDLK | NLRVIAEYLQ | KDPKSGAKRD | WVAIYDECAS  | VLYQEIDYTK |
| 20 | Gloeobacter_violaceus_PCC_74  | LEKLFNVDLG | ILRGIAQYLQ | NHPRYRGGRE | WVPIYDECAR  | ILMQEIDYLN |
| 35 | Synechococcus_sp__PCC_7502_B  | LLKLFAIDLG | ILKQIAQYYQ | NHPKHGKNRD | WLG IYDECQR | ILYQEADYLN |
| 37 | Synechococcus_elongatus_PCC__ | LQQLFVTDLA | ILRGIAEYFQ | RHRRWGQGRD | WVG IYEECCR | ILWQETDYLR |
| 28 | Synechococcus_sp__JA-3-3Ab_B  | LTRLFTIDLE | ICRGIAEFFQ | YHTRWGPGRD | WIG IYEECRR | TLWEEVDYLN |
| 40 | Chamaesiphon_minutus_PCC_660  | LNLKFTIDLE | ILRGIAKYFQ | NHPKWGGGRD | WLG IYEECCR | ILWEETDYIS |
| 29 | Synechococcus_sp__PCC_7335_B  | LSRLEFDL   | ILKGIAEYFQ | NHKEWGRGRD | WLG IYAECCR | LLWLEIDFLH |
| 30 | Leptolyngbya_sp__PCC_7375_Ba  | LQRLFQIDLS | ILKGIANYFQ | SHPEWGRGRD | WIG IYEECCR | ILWLEIDFLH |

|     |                                       |            |            |            |              |            |
|-----|---------------------------------------|------------|------------|------------|--------------|------------|
| 26  | <i>Microcystis aeruginosa</i> _PCC_9  | LKKLFSIDLA | ILKKIAQYFQ | NHPKWGKGRD | WTGIYEECCCK  | ILWEETDYLN |
| 16  | <i>Stanieria cyanosphaera</i> _PCC_7  | LKQLFTIDLA | ILKQIARYFQ | NHPRWGQGKD | WIGIYEECCR   | ILWEETDYIN |
| 27  | <i>Gloeocapsa</i> _sp__PCC_73106_Bac  | LQKLFTIDLA | ILKKITQYFQ | NHPRWGKGRD | WVGIYEECCR   | ILWEETDYLK |
| 18  | <i>Cyanothece</i> _sp__PCC_7822_Bact  | LKKLFTIDLD | ILKRIAQYFQ | NHPKWGRGRD | WLGIIAECCR   | ILWLETDYLN |
| 14  | <i>Pleurocapsa</i> _sp__PCC_7327_Bac  | LKKLFTIDLA | ILKKIAHYFQ | NHPKWGKGRD | WLGIIYEECCR  | ILWLETDYLN |
| 39  | <i>Leptolyngbya</i> _sp__PCC_6406_Ba  | LKKLFEIDLS | ILKGITHYFQ | NHPDWGKGRD | WLGIIYDECCR  | ILWEEIDYLN |
| 33  | <i>Geitlerinema</i> _sp__PCC_7407_Ba  | LKKLFSIDLD | ILRGIARYFQ | NHPDWGRGRD | WTGIYEECCR   | ILWLEIDYLN |
| 31  | <i>Crinalium epipsammum</i> _PCC_933  | LRKLFTIDLQ | ILKGITRYFQ | NHPNWGRGRD | WLGIIYEECCR  | ILWEEIDYIS |
| 21  | <i>Moorea producens</i> _3L_Bacteria  | LKKLFTIDLQ | ILKGIAYYFQ | NHPDWGRGRD | WSGIYEECCR   | ILWQEIDYLN |
| 24  | <i>Calothrix</i> _sp__PCC_6303_Bacte  | LKKLFEIDLE | ILKGIARYFQ | NHRKWGKGRD | WMGIYEECCCK  | ILWQEIDYLG |
| 22  | <i>Gloeocapsa</i> _sp__PCC_7428_Bact  | LRKLFEIDLK | ILRGITQYFQ | NHPKWGRGRD | WIGIYEECCR   | ILWEEIEYIN |
| 32  | <i>Chroococciopsis thermalis</i> _    | LKKLFEIDLA | ILKGITRYFQ | NHPDWGRGRD | WLGIIYEECCR  | ILWEEIDYLN |
| 25  | <i>Raphidiopsis brookii</i> _D9_Bact  | LKKLFEIDLQ | ILKGITNYFQ | NHPEWGRGRD | WMGIYEECCR   | ILWEEIDYLN |
| 17  | <i>Rivularia</i> _sp__PCC_7116_Bacte  | LKQLFEIDLK | ILKGITKYFQ | NHPKWGRGRD | WVGIIYEECCR  | ILWEEIDYLN |
| 19  | <i>Fischerella</i> _sp__JSC-11_Bacte  | LKKLFEIDLK | ILKGIARYFQ | NHPKWGRGRD | WIGIYEECCR   | ILWEEIDYLN |
| 34  | <i>Cyanothece</i> _sp__PCC_7425_Bact  | LKQLFRIDLA | ILKGITYYFQ | NHPDWGPGRD | WLGIIYEECCR  | ILYEEIDYLN |
| 36  | <i>Scillatoriales cyanobacteri</i>    | LVKLFQIDLA | ILKGITRYFQ | NHPDWGRGRD | WLGIIYDECCCK | ILYEEIDYLN |
| 13  | <i>Volvox carteri</i> _f__nagariensi  | LKQLFDIDLN | NLRILAEQLD | K----DENRD | FKGIYQECAT   | VLYQEIDYLN |
| 10  | <i>Arabidopsis lyrata</i> _subsp__ly  | LKKLFDIDLR | NLKLIAEYFQ | KSESF--TND | WVGIIYEECAS  | ILYKEIDYIN |
| 12  | <i>Physcomitrella patens</i> _subsp__ | LKRLFDIDLN | NLKVIAQYFQ | NSESMGPTRD | WLGIIYEECAT  | ILYQEIDYLR |
| 15  | <i>Selaginella moellendorffii</i> _E  | LKELFDIDLS | NLKFIAEYFQ | KDEMLGPLRD | WVGIIYDECAT  | VLYREIDYIN |
| 04  | <i>Phaeodactylum tricorutum</i> _CC   | LRELFEVDLG | QLRQVAVFAD | ADLTSGTQRD | WVSVFQENQR   | LLYEEIDYIN |
| 08  | <i>Thalassiosira pseudonana</i> _CCM  | LRELFDVDLG | QLKRLAEFAD | ADLTSGTKRS | WVSVYFEMKR   | LLYEEIDYLN |
| 01  | QUERY_Bigel_abc_86002                 | LDNFLKSDLV | NLRLLAVILD | KDPKTGAQRD | WVRIYEEESAR  | LLYKEIDYTN |
| 463 | <i>Emiliana huxleyi</i> _Localdb__    | LRELFDIDLK | NLKVLVLLD  | KDPKSGADRS | YSDIYEESSK   | LLYEEIDYGL |
| 06  | <i>Thalassiosira pseudonana</i> _CCM  | LKELFDVDLK | NLKKLAELLD | KDPKTGADR  | WVSIYEEESER  | LLYLEIDYLN |
| 07  | <i>Phaeodactylum tricorutum</i> _CC   | LKELFDIDLK | NLKKLAVLLD | KDPKTGADR  | WVSIYEEESER  | LLYLEIDYLN |
| 283 | <i>Aureococcus anophagefferens</i>    | LVEQFDVDCK | NIRFLASVAD | RDPENGVSSN | WRGIADTSEG   | VLYREIDFLV |
| 83  | <i>Porphyridium cruentum</i> _Eukary  | -----      | -----      | -----      | -----        | -----      |
| 295 | <i>Ectocarpus siliculosus</i> _Loca   | LKALFDQDLK | NLKLLVKVLD | KDPKFGADR  | WVSIYEEESAK  | LLYKEIDYIN |
| 537 | <i>Pyropia yezoensis</i> _Localdb__   | LRELFDVDLK | NLRALAGLLD | RDPKTGAQRN | WLGIFEESAV   | LLYEEIDYTH |
| 75  | <i>Cyanidioschyzon merolae</i> _Euka  | LRELFDVDLK | NLRLLAQMLD | WDPKTGASRN | WVEIYNESAR   | LLYEEIDYEN |

201

|     |                                       |            |            |            |             |            |
|-----|---------------------------------------|------------|------------|------------|-------------|------------|
| 11  | <i>Micromonas</i> _sp__RCC299_Eukary  | EAKNAKDFAA | QFAGTDWIKV | PRVYDQYTRK | RTMCMYAPA   | TKINDLEAIQ |
| 230 | <i>Streptococcus tauri</i> _Eukaryota | EAKNAEEFKN | QFAGVDWIKV | PKIYWEFTKR | RTLTCMEYAPA | TKINDLEGLK |
| 09  | <i>Volvox carteri</i> _f__nagariensi  | EGKNADRFRE | NFADVEWVKV | PKVYWEYSGQ | EVLVLEYVPG  | TKINDGPAID |
| 60  | <i>Chlamydomonas reinhardtii</i> _Eu  | DEREAEEGGE | GAEKKDLA   | SSRHHPHPS- | ---ILSPLTG  | VKINDAAKID |
| 05  | <i>Selaginella moellendorffii</i> _E  | EAANAERFAA | NFKDLSYVKV | PRIYWKYTP  | QVLTMEYVPG  | IKINKIKALD |
| 02  | <i>Physcomitrella patens</i> _subsp__ | EATNAERFAE | NFKDMPYVKA | PAIYREFSTP | QVLVMEYVPG  | IKINRIAALD |

|                                |            |            |            |            |            |
|--------------------------------|------------|------------|------------|------------|------------|
| 03Oryza_sativa_Japonica_Group_ | EAFNAEKFSE | NFKNMDYVKV | PEILWEYTP  | QVLTMEYVPG | IKINRIKQLD |
| 20Gloeobacter_violaceus_PCC_74 | EGRNADTFRR | NFKDSPEICV | PRVYWRYSSP | RVLTLEYLPG | IKISNYEALE |
| 35Synechococcus_sp_PCC_7502_B  | EGRNADTFRR | NFRSSDRILV | PKVYWRYTSK | RILTLEYLPG | IKISDYSSLE |
| 37Synechococcus_elongatus_PCC_ | EGRNADRFRR | DFRDCDWLLV | PRVYWRYASP | RVLTLEYLPG | IKISDYTALE |
| 28Synechococcus_sp_JA-3-3Ab_B  | EGRNADTFRR | NFRDMPQIAV | PKVYWRYTSP | RLLTLEYLPG | IKISDYEALS |
| 40Chamaesiphon_minutus_PCC_660 | EGQNADTFRR | NFRSQDWVMV | PRVYWRYSSP | RLLTLEYLPG | IKISSYEGLE |
| 29Synechococcus_sp_PCC_7335_B  | EGRNGDKFRR | NFRGVDWVKV | PRIYWRYTSP | KVLTLEYMPG | IKISHYEALE |
| 30Leptolyngbya_sp_PCC_7375_Ba  | EGRNADTFRR | NFRAIDWVKA | PRIYWRYASR | RVLTLEYLPG | IKISHYESLE |
| 26Microcystis_aeruginosa_PCC_9 | EGRNADTFRR | NFRGEDWVKV | PKVYWRYTSP | QVLTLEYLPG | IKISHYEALE |
| 16Stanieria_cyanosphaera_PCC_7 | EGRNADTFRR | NFRQENWVHV | PRVYWRYASP | RVLTLEYLPG | IKISHYEAI  |
| 27Gloeocapsa_sp_PCC_73106_Bac  | EGRNADTFRR | NFRSKNWVQV | PKVYWRYTSP | RVLTLEYMPG | IKISHYEALE |
| 18Cyanotheca_sp_PCC_7822_Bact  | EGRNADTFRR | NFRAADWVKV | PRVYWRYTSP | QVLTLEYLPG | IKISHYEAI  |
| 14Pleurocapsa_sp_PCC_7327_Bac  | EGRNADTFRR | NFRQNWVKV  | PKVYWRYTSP | RVLTLEYVPG | IKISHYEALE |
| 39Leptolyngbya_sp_PCC_6406_Ba  | EGRNADTFRR | NFRGQDWVKV | PRVYWRYASP | RVLTLEYLPG | IKISHYEALE |
| 33Geitlerinema_sp_PCC_7407_Ba  | EGRNADHFRR | NFRNESWVKV | PRVYWRYSSP | RLLTLEYLPG | IKISHYEALE |
| 31Crinalium_epipsammum_PCC_933 | EGSNADTFRR | NFREEDWVKV | PRVYWRYASP | RVLTLEYLPG | IKISHYQALE |
| 21Moorea_producens_3L_Bacteria | EGRNADTFRR | NFRSYDWVKV | PRVYWRYTSS | RVLTLEFLPG | IKISSYEALE |
| 24Calothrix_sp_PCC_6303_Bacte  | EGRNADTFRR | NFRGYNWVKV | PRVYWRYASS | RVLTLEYLPG | IKVTQYEALE |
| 22Gloeocapsa_sp_PCC_7428_Bact  | EGRNADTFRR | NFRAYDWVKV | PRVYWRYTSS | RVLTLEYVPG | IKISHYEALE |
| 32Chroococciopsis_thermalis_   | EGRNADTFRR | NFREYDWVKV | PRIYWRYTSP | QVLTLEYAPG | IKISHYEAI  |
| 25Raphidiopsis_brookii_D9_Bact | EGRNADTFRR | NFRSYNWVKV | PRVYWRYTSS | KIITLEYVPG | IKISQYEALE |
| 17Rivularia_sp_PCC_7116_Bacte  | EGRNADTFRR | NFRAQEWVKV | PRVYWRYASP | RVLTLEYVPG | IKISQYEALE |
| 19Fischerella_sp_JSC-11_Bacte  | EGRNADTFRR | NFRAYGWVKV | PRVYWRYTSS | RVLTLEYVPG | IKISQYEAI  |
| 34Cyanotheca_sp_PCC_7425_Bact  | EGQNADTFRR | NFREFAWACV | PRVYWRYSSP | RVLTLEYLPG | IKISHYEALE |
| 36Oscillatoriales_cyanobacteri | EGRNADTFRR | NFRGESWVQV | PRVYWRYASP | RVLTLEYLPG | IKISHYEALE |
| 13Volvox_carteri_f_nagariensi  | EGRNADRFRR | NFRDASWARA | PKVYWEYCSP | RVLVLEYLPG | AKISDKARLQ |
| 10Arabidopsis_lyrata_subsp_ly  | EAKNADRFRR | DFRNINWVRV | PLVYWDYSAM | KVLTLEYVPG | VKINNLDALA |
| 12Physcomitrella_patens_subsp_ | EGRNADRFRR | DFRKQKWVRV | PQVFWDYASQ | KVLTLEYVPG | IKINDVALLD |
| 15Selaginella_moellendorffii_E | EGRNADKFRR | DFRNKWKVKV | PKVYWDFTSR | KVITLEYLPG | IKINDLAALD |
| 04Phaeodactylum_tricornutum_CC | EMNNCNRFRE | NFAKFRHIRA | PKTYPEFTTD | KVMAMEFLPG | IKVTDKEKIE |
| 08Thalassiosira_pseudonana_CCM | EIDNCNRFRC | NFPKFSHIKA | PKTYPEYTTD | KVLTMEYCPG | IKITDVDRIK |
| 01QUERY_Bigel_abc_86002        | EAKNAERFKE | NFADVPWIKV | PDIYWETTSK | RVLTMEYVPS | VKINNIEEIE |
| 463Emiliana_huxleyi_Localdb__  | EAANCLRFAE | SLAGLDYVRV | PQVYNEVTPP | RVLTLEYVPS | FKLTDLPRVE |
| 06Thalassiosira_pseudonana_CCM | EAANCERFAR | DF-DIEYVRV | PEVYREVSTP | RVLTMEFVES | FKLTNIEKIE |
| 07Phaeodactylum_tricornutum_CC | EADNTDRFAK | DF-GYDWVRI | PKVIREVTPP | RLVMEFVES  | FKLTDIEEIN |
| 283Aureococcus_anophagefferens | ERDAAERFRR | AFKPLPWVKV | PKTFDEYCTS | RVLVMEYVPG | TKINDVPALE |
| 83Porphyridium_cruentum_Eukary | -----      | -----      | -----      | -----      | -----      |
| 295Ectocarpus_siliculosus_Loca | EAENAIRFKE | NFQDTPWVKV | PDVYWNMTSE | RVVTMEFVPG | VKINNIDEID |
| 537Pyropia_zezoensis_Localdb__ | EAANAERMRE | NFAGTPWVRI | PSVLWERTSE | AVLTMEFVQG | VKINDYAAME |
| 75Cyanidioschyzon_merolae_Euka | EAQNAREFAD | NFGANDWVRV | PRILDAYTSK | RVLVMEYVKG | TKISAVEALD |

|    |                              |             |            |            |           |            |
|----|------------------------------|-------------|------------|------------|-----------|------------|
| 11 | Micromonas_sp__RCC299_Eukary | KMGVDPDRMA  | RLAVESYLMQ | VLRFGFFHAD | PHPGNAVGR | LVIYDYGMMG |
| 23 | Ostreococcus_tauri_Eukaryota | KIGVDPDRMA  | RLAVEAYLQQ | VLRFGFFHAD | PHPGNAVGR | LVVYDYGMMG |
| 09 | Volvox_carteri_f__nagariensi | RLGLDRKRLA  | RLSVESYLQQ | ILRHGFFHAD | PHPGNAVGR | LIYYDFGMMG |
| 60 | Chlamydomonas_reinhardtii_Eu | ALGLDRQKLA  | RLSVESYLQQ | ILRHGFFHAD | PHPGNAVGR | LIYYDFGMMG |
| 05 | Selaginella_moellendorffii_E | RLGVDRQRLA  | RYCVESYLEQ | ILRHGFFHAD | PHPGNAVGR | LIFYDFGMMG |
| 02 | Physcomitrella_patens_subsp_ | ELGVDRKRLA  | RYAVESYLEQ | ILRHGFFHAD | PHPGNAVGR | LIFYDFGMMG |
| 03 | Ryza_sativa_Japonica_Group_  | KLGVDRKRLG  | RYAVESYLEQ | ILSHGFFHAD | PHPGNAVGR | LIFYDFGMMG |
| 20 | Gloeobacter_violaceus_PCC_74 | AAGLDRRSLA  | RIGARSYLQQ | LLNDGFFHAD | PHPGNAVGA | LIFYDFGMMG |
| 35 | Synechococcus_sp__PCC_7502_B | AAGIDRKILA  | KLGAESYLRL | LLNDGFFHAD | PHPGNAVGS | LIFYDFGMMG |
| 37 | Synechococcus_elongatus_PCC_ | AANLDRQKIS  | QLNAEAYLRQ | VLNHGFFHAD | PHPGNAVGR | LIFYDFGMMG |
| 28 | Synechococcus_sp__JA-3-3Ab_B | AAGLDRKLLA  | RLGAEAYLRQ | LLKDGFHAD  | PHPGNAVGT | LIFYDFGMMG |
| 40 | Chamaesiphon_minutus_PCC_660 | AAGLDRQTIA  | RQSATAYLQQ | LLTDGFFHAD | PHPGNAVGA | LIFYDFGMMG |
| 29 | Synechococcus_sp__PCC_7335_B | SAGLDRKRLA  | RLGAEAYLRQ | LLTDGFFHAD | PHPGNAVGA | LIFYDFGMMG |
| 30 | Leptolyngbya_sp__PCC_7375_Ba | AAGLDRQQLA  | QLGAQAYLHQ | LLNDGFFHAD | PHPGNAVGA | LIFYDFGMMG |
| 26 | Microcystis_aeruginosa_PCC_9 | AAGLDRKLLA  | KLGAAYLIQ  | LLNNGFFHAD | PHPGNAVGS | LIFYDFGMMG |
| 16 | Stanieria_cyanosphaera_PCC_7 | AAGLDRKLLA  | RLGAKAYLQQ | LLNSGFFHAD | PHPGNAVGS | LIFYDFGMMG |
| 27 | Gloeocapsa_sp__PCC_73106_Bac | AAGLDRKRLA  | RLGAEAYLQQ | LLNDGFFHAD | PHPGNAVGS | LIFYDFGMMG |
| 18 | Cyanothece_sp__PCC_7822_Bact | AAGLDRKLLA  | RLGAKAYLQQ | LLNDGFFHAD | PHPGNAVGA | LIFYDFGMMG |
| 14 | Pleurocapsa_sp__PCC_7327_Bac | AAGLDRKLLA  | KLGAAYLQQ  | LLNDGFFHAD | PHPGNAVGA | LIFYDFGMMG |
| 39 | Leptolyngbya_sp__PCC_6406_Ba | ASGLDRKRLA  | NLGARAYLHQ | LLNDGFFHAD | PHPGNAVGA | LIFYDFGMMG |
| 33 | Geitlerinema_sp__PCC_7407_Ba | AAGLDRKLLA  | QLGARAYLQQ | LLNDGFFHAD | PHPGNAVGS | LIFYDFGMMG |
| 31 | Crinalium_epipsammum_PCC_933 | AAGIDRKLVLA | QLGAKAYLHQ | LLNDGFFHAD | PHPGNAVGS | LIFYDFGMMG |
| 21 | Moorea_producens_3L_Bacteria | AAGLDRKLLA  | RLGAEAYLQQ | LLNDGFFHAD | PHPGNAVGS | LIFYDFGMMG |
| 24 | Calothrix_sp__PCC_6303_Bacte | AAGLDRKVLA  | RQSAEAYLHQ | LLDSGFFHAD | PHPGNAVGA | LIFYDFGMMG |
| 22 | Gloeocapsa_sp__PCC_7428_Bact | AAGIDRKLVLA | RQGAEAYLQQ | LLNDGFFHAD | PHPGNAVGS | LIFYDFGMMG |
| 32 | Chroococciopsis_thermalis_   | AAGLDRKLLA  | RQGAEAYLHQ | LLHNGFFHAD | PHPGNAVGS | LIFYDFGMMG |
| 25 | Raphidiopsis_brookii_D9_Bact | AAGVDRKAIA  | RYGAQAYLHQ | LLNNGFFHAD | PHPGNAVGA | LIFYDFGMMG |
| 17 | Rivularia_sp__PCC_7116_Bacte | AAGLDRKVLA  | RQGAEAYLHQ | LLNNGFFHAD | PHPGNAVGA | LIFYDFGMMG |
| 19 | Fischerella_sp__JSC-11_Bacte | AAGLDRKQIA  | RQGAQAYLLQ | LLDNGFFHAD | PHPGNAVGA | LIFYDFGMMG |
| 34 | Cyanothece_sp__PCC_7425_Bact | AAGLDRKELA  | QLGAKAYLHQ | LLNDGFFHAD | PHPGNAVGG | LIFYDFGMMG |
| 36 | Scillatoriales_cyanobacteri  | AAGLDRRRLA  | QLGAEAYLHQ | LLNNGFFHAD | PHPGNAVGA | LIFYDFGMMG |
| 13 | Volvox_carteri_f__nagariensi | AAGLDLDTIA  | RRATEAYLIQ | ILKHGFFHAD | PHPGNVSGD | LLFYDFGMMG |
| 10 | Arabidopsis_lyrata_subsp__ly | ARGFNRSRIA  | SRAIEAYLIQ | ILKTGFFHAD | PHPGNAVGS | LIYYDFGMMG |
| 12 | Physcomitrella_patens_subsp_ | AGGFDPKPLA  | RLAIEAYLIQ | ILRTGFFHAD | PHPGNAVGS | LIYYDFGMMG |
| 15 | Selaginella_moellendorffii_E | AGSYKRSLIA  | SRAIEAYLIQ | ILKTGFFHAD | PHPGNAVGS | LIYYDFGMMG |
| 04 | Phaeodactylum_tricornutum_CC | QAGLDPIDIS  | VKMAEGFLEQ | LCRHGFFHSD | PHPGNAVAV | LIFYDFGMMG |
| 08 | Thalassiosira_pseudonana_CCM | EEGLDPADIS  | KKSAEAFLEQ | LCRHGFFHCD | PHPGNAVAV | LIFYDFGMMG |
| 01 | QUERY_Bigel_abc_86002        | RRGIDR----  | -----      | -----      | -----     | -----MD    |

|                                |              |             |            |            |            |
|--------------------------------|--------------|-------------|------------|------------|------------|
| 463Emiliana_huxleyi_Localdb__  | AAGLDPKLLA   | KRTADAFLLTQ | -----      | -----GK    | LVEYDCGMMN |
| 06Thalassiosira_pseudonana_CCM | SLGLDREVLVLA | KRTADAFLLRQ | IVETGYFHCD | PHPGNLCVGN | LVEYDFGMMD |
| 07Phaeodactylum_tricornutum_CC | RNGLDRKVIS   | KRVADAFLLRQ | IVETGYFHAD | PHSGNLCVGN | LVEYDYGMMD |
| 283Aureococcus_anophagefferens | KMDVDLPLIS   | QRLTTSYLEQ  | LARHGFFHCD | PHPGNVAVGR | LIYYDFGMME |
| 83Porphyridium_cruentum_Eukary | -----        | -----       | -----      | -----      | -----      |
| 295Ectocarpus_siliculosus_Loca | RRGIDRKLLA   | KRSAEAYLTQ  | LCRHGFFHCD | PHPGNVACGR | LIFYDFGMMD |
| 537Pyropia_zezoensis_Localdb__ | AMGVDRTLVA   | RRAAQSFLLTQ | LLRHGFFHDD | CHPGNLHVGG | LIYYDFGMCS |
| 75Cyanidioschyzon_merolae_Euka | ALGLDRKLLA   | ERLGRFFLEQ  | TLRHGFIHCD | PHPGNIAVGR | LLVYDFGMCC |

## 301

|                                  |              |            |             |            |            |
|----------------------------------|--------------|------------|-------------|------------|------------|
| 11Micromonas_sp__RCC299_Eukary   | RIDPKVRSGL   | LDLFYAVFEK | NSDSAVKALG  | KMGVLVEGGD | MTAVKRTADF |
| 230Streptococcus_tauri_Eukaryota | RIPSTTRDGL   | LDLFYATYEG | QSDSAVKALM  | KMGVLVDGGD | LTAVKRTADF |
| 09Volvox_carteri_f__nagariensi   | SLAPEVKSGL   | LELFYGVYNR | DPDRCLEALT  | TMGVYLPTGD | KTAVRRTAEF |
| 60Chlamydomonas_reinhardtii_Eu   | SLAPEVKGGL   | LELFYGVYNR | DPDRCLEALT  | AMGVYVPSGD | KTAVRRTAEF |
| 05Selaginella_moellendorffii_E   | SISSNIREGL   | LEAFYGVYEK | DADKVLAMV   | QMGVLVPTGD | MTAVRRTAQF |
| 02Physcomitrella_patens_subsp_   | SISPNIREGL   | LEVFGVYEK  | DPDKVLAAMV  | QMGVLVPSDD | LTAVRRTAQF |
| 03Oryza_sativa_Japonica_Group_   | SISPNIREGL   | LEAFYGVYEK | DPDKVLQSMI  | QMGVLVPTGD | MTAVRRTAQF |
| 20Gloeobacter_violaceus_PCC_74   | HIQPGTKEKL   | MDTFLGVAQS | DADKVIDSLI  | ELGAIKKSAD | RVPIRRSIEF |
| 35Synechococcus_sp__PCC_7502_B   | QIQPITKTKL   | VNVFFGIAQK | DAELVIASLI  | DLGALEISGD | IDPVRRSVQY |
| 37Synechococcus_elongatus_PCC_   | EIRTDVRSKL   | MQVFLGIARK | DADDIVSALV  | ELGALLPTGD | LGPVRRSVQY |
| 28Synechococcus_sp__JA-3-3Ab_B   | RIRPGIKGKL   | VAMLAADVAK | NADLVVASLV  | ELGVLVPTAD | LAPVRRSVQY |
| 40Chamaesiphon_minutus_PCC_660   | RIAPGTKEKL   | MDTLAIAGR  | NADRVVRLV   | GLGAIAAEAD | TDPIRRSVQY |
| 29Synechococcus_sp__PCC_7335_B   | QIQAVTRTRL   | MDTFFGIAQR | DAGLVMKSLV  | ELGALAQIDD | MGPVRRSIQY |
| 30Leptolyngbya_sp__PCC_7375_Ba   | QIQPLTRDGL   | MRTFMGVSQR | NADMVMASLI  | DLGALTETED | MGPVRRSIQY |
| 26Microcystis_aeruginosa_PCC_9   | QIKTNVREKL   | MQTLLGIAQK | DADRVVTSLV  | DLGALTANGD | MGAVRRSIQY |
| 16Stanieria_cyanosphaera_PCC_7   | QIKNNIREKL   | MDTLFGIAQK | NADLVVNSLI  | EVGALTPTGD | LSPVRRSVQY |
| 27Gloeocapsa_sp__PCC_73106_Bac   | QIKTDVREKL   | MQTLFGIAEK | NAERVVRSLV  | ELGALTPIGD | MGPVRRSVQF |
| 18Cyanothecce_sp__PCC_7822_Bact  | KITSNIREDL   | METLFGIAEK | NAERVVNSLI  | ALGALAPTND | MGPVRRSVQY |
| 14Pleurocapsa_sp__PCC_7327_Bac   | EIKTNIREKL   | MQTLFGIAEK | NADRVVNSLI  | DLGALEPTGD | MSSVRRSIQF |
| 39Leptolyngbya_sp__PCC_6406_Ba   | QVQPATRDRL   | MVTFMGVAQR | DAGLVVASLV  | DLGALVEVDD | MGPVRRSIQY |
| 33Geitlerinema_sp__PCC_7407_Ba   | QVRTDIREKL   | MDTFFGIAQK | DAARVDSLII  | ALEAIPTDD  | IGPVRRSVQY |
| 31Crinalium_epipsammum_PCC_933   | TVNPITREKL   | MDTLFGISQK | DADRVVKSLLV | ELGALAPVDD | MGPVRRSVQY |
| 21Moorea_producens_3L_Bacteria   | QIKANVREQL   | METLFGIAQK | DGDRVVTSLLI | ELGALSPVSD | MGPVRRSVQY |
| 24Calothrix_sp__PCC_6303_Bacte   | QIKSNVRESL   | METLFGVASK | DGDRVLQSMV  | DLGVIAPTDD | MGPVRRSVQY |
| 22Gloeocapsa_sp__PCC_7428_Bact   | QIKTGVREQL   | MKTLFGIAQK | DAQQVMDSLII | ALGALAPTDD | MGPVRRSIQY |
| 32Chroococcidiopsis_thermalis_   | RIKANVREQL   | METLFGIAQK | DGGRVVASLLV | ELGALAPTDD | MGPVRRSVQF |
| 25Raphidiopsis_brookii_D9_Bact   | I I KSNVREGL | METLFGIAQK | DGDRVVQSLII | NLGAIAPVED | MGPVRRSVQY |
| 17Rivularia_sp__PCC_7116_Bacte   | RIQSNVREGL   | MDTLFGVASK | DGERVVNSLLV | NLGALAPTDD | MGPVRRSVQY |
| 19Fischerella_sp__JSC-11_Bacte   | RIKSNVREGL   | METLFGIASK | DGDRVVQSLII | NLGALAPVED | MGPVRRSVQY |
| 34Cyanothecce_sp__PCC_7425_Bact  | RVQPITREKL   | VRTFMGIARR | DGQVMNALV   | DLGALAPVED | MGPVRRSIQY |



|    |                              |             |            |            |            |            |
|----|------------------------------|-------------|------------|------------|------------|------------|
| 36 | scillatoriales_cyanobacteri  | QVKPVTREKL  | MQTFFGIANK | NADQVIESLI | ELGALAPTED | MGPVRRSIQF |
| 13 | Volvox_carteri_f_nagariensi  | EIVPDVTRL   | LDVFGVYRK  | DTDQVLRALV | ALQVIKPTGD | SLSLRRAINY |
| 10 | Arabidopsis_lyrata_subsp_ly  | EIKTFTRKRL  | LDLFYSVYEK | DAKKVMQNLI | DLEALQPTGD | LSSVRRSVQF |
| 12 | Physcomitrella_patens_subsp_ | EIKSFTREKL  | LEMFYAVYEK | DARKIIQALI | DLGALVPTGD | MGSVRRSVQY |
| 15 | Selaginella_moellendorffii_E | EIKSFTKEKL  | LELFYAVYEE | DASKVIQGLV | DLGALVPTGD | MGPVKKTIQF |
| 04 | Phaeodactylum_tricornutum_CC | SFGDVQRKGL  | VDFFFAVYDA | NVKDAMDALE | RLGMLRNGID | RVAVERVGKD |
| 08 | Thalassiosira_pseudonana_CCM | EFGAVERKGL  | VDFFFALYDA | DAKDVCNALE | RLGMLRKGVD | RMSVEKVGQD |
| 01 | QUERY_Bigel_abc_86002        | EFSTGVRKGL  | VNLIYSVYEN | DEVGLCNALE | EMGILQPDS  | RLSVERISRF |
| 46 | Emiliana_huxleyi_Localdb__   | ELQPNVFSGF  | KEACGAVFAT | NAKRLVDALE | LMGVLAKSAD | RLAVEKLARY |
| 06 | Thalassiosira_pseudonana_CCM | ELKPNVRSGF  | RKFCTALFAE | NAKMLVDGVE | EAGVLARGAD | RLAVEKLARY |
| 07 | Phaeodactylum_tricornutum_CC | ELSPNVKAGF  | RKFCTALFAQ | NAKELVAGVE | QAGVLAKGAD | RLAVEKLARY |
| 28 | Aureococcus_anophagefferens  | SIEPDVKKGF  | VDLVYSLYKN | QPITACDALE | QMGVLRPGLD | RYSIERIATN |
| 83 | Porphyridium_cruentum_Eukary | -----       | -----      | -----      | -----      | -----      |
| 29 | Ectocarpus_siliculosus_Loca  | EFKPNVRSGL  | VNLIFSTYEN | DPRAVCDALV | EMGILKAGSD | RISVEKIARS |
| 53 | Pyropia_zezoensis_Localdb__  | SISPSVRQGF  | INTVFAIYEG | TPQDFCDGLA | AMGILRPTAD | RLSVEKIGRY |
| 75 | Cyanidioschyzon_merolae_Euka | RLTAKVRRRAV | VNLVFATYEN | DVAAFVDALA | EMGVLKQTAD | RLTVYRIARY |

## 351

|    |                               |             |            |           |            |            |
|----|-------------------------------|-------------|------------|-----------|------------|------------|
| 11 | Micromonas_sp_RCC299_Eukary   | FLGSFDNRRK  | QILSNIGEDL | LVVSKDQPF | FPAELTFVVR | AFSVLDGIGK |
| 23 | Streptococcus_tauri_Eukaryota | FLTQFDARRK  | KILSNIGEDL | LVVSKDQPF | FPAELTFVVR | AFSVLDGIGK |
| 09 | Volvox_carteri_f_nagariensi   | FLKGFQERRR  | QILASIGEDL | LLAANDQPF | FPATFTFVVR | SFTVLDGIGK |
| 60 | Chlamydomonas_reinhardtii_Eu  | FLKGFQDRRK  | QILSSIGEDL | LLAANDQPF | FPATFTFVVR | SFTVLDGIGK |
| 05 | Selaginella_moellendorffii_E  | FLKSFQDRKK  | LRLAAIGEDL | LSISSDQPF | FPATFTFVVR | AFSVLDGIGK |
| 02 | Physcomitrella_patens_subsp_  | FLNSFEERKK  | LRLAAIGEDL | LSIGADQPF | FPATFTFVVR | AFSVLDGIGK |
| 03 | Oryza_sativa_Japonica_Group_  | FLDSFEERKK  | QRLAAIGEDL | LSIAADQPF | FPATFTFVVR | AFSVLDGIGK |
| 20 | Gloeobacter_violaceus_PCC_74  | LLTNFVNQQS  | FNFAELTDDI | YEMAYEQPF | FPATFTFVLR | AVSTLEGLGK |
| 35 | Synechococcus_sp_PCC_7502_B   | MLDNFMGKAS  | QSITAISDDL | FEVAYAQP  | FPATFTFVLR | ALSTLEGLGK |
| 37 | Synechococcus_elongatus_PCC_  | LLDNFLDREG  | QSISAISDDI | YEIAYDQP  | FPATFTFVMR | AFSTLEGVVK |
| 28 | Synechococcus_sp_JA-3-3Ab_B   | MLDHFMDKDE  | ISVMAISED  | YELAYDQP  | FPATFTFVMR | ALTLEGLGK  |
| 40 | Chamaesiphon_minutus_PCC_660  | LLDNFLDKES  | QSIAQITDDL | YDIAYGQP  | FPATFTFVMR | AFSTIEGVVK |
| 29 | Synechococcus_sp_PCC_7335_B   | ILDNFMMDKEE | QSVTAISDDL | YAVAYDQP  | FPATFTFVMR | AFSTLEGVVK |
| 30 | Leptolyngbya_sp_PCC_7375_Ba   | ILDNFMMDKEE | QSITAISDDL | YAVAYDQP  | FPATFTFVMR | AFSTLEGVVK |
| 26 | Microcystis_aeruginosa_PCC_9  | MLDNFMMDKEE | QSVASISDDL | YEIAYDQP  | FPATFTFVMR | AFSTLEGVVK |
| 16 | Stanieria_cyanosphaera_PCC_7  | MLDNFMMDKEE | QSIEAISED  | YDIAYGQP  | FPATFTFVMR | AFSTLEGVVK |
| 27 | Gloeocapsa_sp_PCC_73106_Bac   | MLDNFMMDQEN | QSVAAISED  | YEIAYDQP  | FPATFTFVMR | AFSTLEGVVK |
| 18 | Cyanothece_sp_PCC_7822_Bact   | MLDNFMMDKED | QSVAAISED  | YEIAYDQP  | FPATFTFVMR | AFSTLEGVVK |
| 14 | Pleurocapsa_sp_PCC_7327_Bac   | MLDNFMMDKEE | QSIDQISED  | YEIAYDRP  | FPATFTFVMR | AFSTLEGVVK |
| 39 | Leptolyngbya_sp_PCC_6406_Ba   | ILDNFMMDQEE | QSVTAIGDDL | YAIAYDQP  | FPATFTFVMR | AFSTLEGVVK |
| 33 | Geitlerinema_sp_PCC_7407_Ba   | MLDNFMMDQEN | QSVSAISED  | YEIAYNNP  | FPATFTFVMR | AFSTLEGVVK |
| 31 | Crinalium_epipsammum_PCC_933  | MLDHFMDKEN  | QSVAQISDDL | YEIAYDQP  | FPATFTFVMR | AFSTLEGVVK |

|    |                              |            |             |            |            |            |
|----|------------------------------|------------|-------------|------------|------------|------------|
| 21 | Moorea_producens_3L_Bacteria | MLDNFMDKEE | QSVSNISDDL  | YEIAYGQPFR | FPATFTFVMR | AFSTLEGVVK |
| 24 | Calothrix_sp_PCC_6303_Bacte  | MLDNFMDGEN | KSVAAISDDL  | YEIAYNQPFR | FPATFTFVMR | AFSTLEGVGR |
| 22 | Gloeocapsa_sp_PCC_7428_Bact  | MLDHFMDKEN | QSVAAISDDL  | YEIAYDQPFR | FPATFTFVMR | AFSTLEGVVK |
| 32 | Chroococcidiopsis_thermalis_ | MLDNFMDKEN | QSVSAISDDL  | YEIAYGQPFR | FPATFTFVMR | AFSTLEGVVK |
| 25 | Raphidiopsis_brookii_D9_Bact | MLDNFMDKEN | QSVATISEDL  | YEIAYNQPFR | FPATFTFVMR | AFSTLEGVVK |
| 17 | Rivularia_sp_PCC_7116_Bacte  | MLDHFMDKEK | QSVASISEDL  | YEIAYDQPFR | FPATFTFVMR | AFSTLEGVVK |
| 19 | Fischerella_sp_JSC-11_Bacte  | MLDNFMDKEN | QSVAAISDDL  | YEIAYDQPFR | FPATFTFVMR | AFSTLEGVVK |
| 34 | Cyanothece_sp_PCC_7425_Bact  | MLDNFMDQES | QSVAQISDDL  | YDIAYNQPFR | FPATFTFVMR | AFSTLEGVVK |
| 36 | scillatoriales_cyanobacteri  | MLDNFMDQEA | QSVTEISDDL  | YEIAYGQPFR | FPATFTFVMR | AFSTLEGVVK |
| 13 | Volvox_carteri_f_nagariensi  | FIENL-SRRQ | ETIQAIGEDL  | FAIALDQPFR | FPATFTFVLR | AFSTLEGIGK |
| 10 | Arabidopsis_lyrata_subsp_ly  | FLDNLLSQQQ | QTLAAIGEDL  | FAISQDQPFR | FPSTFTFVIR | AFSTLEGIGY |
| 12 | Physcomitrella_patens_subsp_ | FLDNLMDQQA | ATFSAIGEDL  | FAIAVDQPFR | FPATFTFVLR | AFSTLEGIGN |
| 15 | Selaginella_moellendorffii_E | FLKNLTSQQA | TTFTAIGEDL  | FAIAVDQPFR | FPSTFTFVLR | AFSTLEGIGY |
| 04 | Phaeodactylum_tricornutum_CC | FIDRFQETTR | ERRRKLGEEF  | LSLNRDSPFV | FPPTWTFVFR | AFFSIDGIGK |
| 08 | Thalassiosira_pseudonana_CCM | FIDRFQATNR | QRRKELGEEF  | LSMNAESPFV | FPPTWTFVLK | AFFTLDGIGK |
| 01 | QUERY_Bigel_abc_86002        | FLEDFQKTPE | EKKKARAERI  | STVYDDRE-K | KKIVFLFLSY | SLRFLEGIGK |
| 46 | Emiliana_huxleyi_Localdb__   | FIRTFKQIAS | NIKTTLGADL  | QALTEQQVFR | FPSTFTFIFR | AFASVDGIGK |
| 06 | Thalassiosira_pseudonana_CCM | FMRTFKDSGS | NIKETVGS DL | QTLTENDVFR | FPSTFTFIFR | SFASIDGIGK |
| 07 | Phaeodactylum_tricornutum_CC | FMRAFKDKSG | NIKQTIGTDL  | QTLTENNVFR | FPSTFTFIFR | AFASVDGIGK |
| 28 | 3Aureococcus_anophagefferens | YE-----RR  | ERRAQIGKDL  | FATQAERPFR | FPPKFTFIFR | AITTDIGIGK |
| 83 | Porphyridium_cruentum_Eukary | -----      | -----       | -----      | -----      | ---TLEGIGK |
| 29 | 5Ectocarpus_siliculosus_Loca | FLGEFTNTRK | ERRAKLGEDL  | LSVSGDVPFK | FPPTFTFVFR | AFTSLDGIGK |
| 53 | 7Pyropia_yezoensis_Localdb__ | FISAFRSSLT | TRLTAIGDEL  | LAVGEDQPFV | FPPVFTFVFR | AFTTLEGVVK |
| 75 | Cyanidioschyzon_merolae_Euka | FLKAFRERLE | KRLSAIGEEL  | LAVADDQPFQ | FPAVFTFVFR | ALTSIDGAAK |

401

|    |                              |            |            |            |            |             |
|----|------------------------------|------------|------------|------------|------------|-------------|
| 11 | Micromonas_sp_RCC299_Eukary  | SLNKKFDIGE | ISAPYARNLL | IDDNAPPQVR | QRDWERRFDR | QNKAIVNLPE  |
| 23 | 0streococcus_tauri_Eukaryota | TLNKKFDISE | IAAPYARNLL | IEANSPPQVA | QREWLRRADA | QTKALVNLPS  |
| 09 | Volvox_carteri_f_nagariensi  | SLDPRFDISE | IAAPYARELL | LEGN----GL | QREFKKGLN  | QNRALKNLPD  |
| 60 | Chlamydomonas_reinhardtii_Eu | SLDPRFDISE | IAAPYARELL | LEGN----GF | QKEFAKGLQQ | QNRALKNLPE  |
| 05 | Selaginella_moellendorffii_E | GLDPYFDISE | IAKPYALEIL | RFRE----YV | IRDFKKRWQR | QAEAFNNLPA  |
| 02 | Physcomitrella_patens_subsp_ | GLDPRFDISE | IAKPYALELL | RFRE----VV | VKDLRKRWR  | QSQAFVNVAE  |
| 03 | 0ryza_sativa_Japonica_Group_ | GLDPRFDITE | IAKPYAMELL | RFNE----VI | VKDARKRWER | QSRAFYNLPE  |
| 20 | Gloeobacter_violaceus_PCC_74 | GLDPDFNFMD | VAQPFADQLM | AVNSEGMREL | FNQLGQQVGG | VSSMTVNLPR  |
| 35 | Synechococcus_sp_PCC_7502_B  | GLDPDFNFME | VAKPFATDLM | GNNNGASS-L | LGELGKQAAQ | VGNTAFNLPR  |
| 37 | Synechococcus_elongatus_PCC_ | GLDPDFNFMT | VAKPYALEIM | SDATPPAG-L | LNEFSRQALA | VGNSALGLPR  |
| 28 | Synechococcus_sp_JA-3-3Ab_B  | SLDPEFNFLE | VAKPFAEELM | -NGSKETETL | LAQVSRQAAE | FTSSSLSLPR  |
| 40 | Chamaesiphon_minutus_PCC_660 | GLDPDFNFME | AAQPFAFQIM | TNGNSPDANF | LAEIGRQAAQ | VGTSALGLPR  |
| 29 | Synechococcus_sp_PCC_7335_B  | GLDPEFNFME | AAKPYATELM | TNGMPEPNGL | LGEISRQAAQ | VGSSALS LPR |
| 30 | Leptolyngbya_sp_PCC_7375_Ba  | GLDPDFNFME | AAKPFANQLM | TNVSNSTNGL | IGEIGRQAAQ | VGSSAFGLPR  |

26Microcystis\_aeruginosa\_PCC\_9 GLDPEFNFME VAQPFALQLV NDMTGNNNGSI LDELGRQAAQ VSSTALSLPR  
 16Stanieria\_cyanosphaera\_PCC\_7 GLDPEFNFME VAQPFAMQLM TNSNGRNNNSI FDEIGRQAAQ VGSTALGLPR  
 27Gloeocapsa\_sp\_PCC\_73106\_Bac GLDPEFNFME VAQPFAMELI TGVNGKNGNI LDELGKQAAQ VSSTALGLPR  
 18Cyanothece\_sp\_PCC\_7822\_Bact GLDPDFNFME VAQPFQIQLM TNDAGNYSSI LDELGRQAAQ MSNTALGLPR  
 14Pleurocapsa\_sp\_PCC\_7327\_Bac GLDPEFNFME VAQPFQIQLM SNTNGRNGSI FDELGREAAQ VGSTALGLPR  
 39Leptolyngbya\_sp\_PCC\_6406\_Ba GLDPDFNFME AAKPFQAAQLM SNGNSNSTDL FGELGRQAAQ MSSTALGLPR  
 33Geitlerinema\_sp\_PCC\_7407\_Ba GLDPEFNFME VAKPFAMQLM AGGNQQETTL FNELGRQAAQ VSSTALNLPR  
 31Crinalium\_epipsammum\_PCC\_933 GLDPDFNFME VARPFAMQIM TDGNGDTGKF LNELGRQAAQ VGSTALGLPR  
 21Moorea\_producens\_3L\_Bacteria GLDPEFNFME VAKPFALEIM TNGNTPDNNF INELGRQAAQ MSSTALGLPQ  
 24Calothrix\_sp\_PCC\_6303\_Bacte GLDSEFNFME VAKPYAMQLM TNMNGSENGI LNELSRQAVQ VSTALGLPR  
 22Gloeocapsa\_sp\_PCC\_7428\_Bact GLDPEFNFME VARPFAMDLM TNGNGIEGNF LNELGRQAAQ VGSTAFGLPR  
 32Chroococcidiopsis\_thermalis\_ GLDPEFNFME VAKPFAFQLM TDGNGVDGNF LNELSRQAAQ VGSTAFGLPR  
 25Raphidiopsis\_brookii\_D9\_Bact GLDPEFNFMA VAQPYAMELM NNNNGSQANF LNELSRQAVQ VSSSALS LPR  
 17Rivularia\_sp\_PCC\_7116\_Bacte GLDPEFSFME VAKPYAMELM SDMNGSENGI INELSRQAVQ VSTAFGLPR  
 19Fischerella\_sp\_JSC-11\_Bacte GLDPEFNFME VAQPYAMQLM TNMNGSEGNF FNELSRQAAQ VSSTAFGLPR  
 34Cyanothece\_sp\_PCC\_7425\_Bact GLDPDFNFME VAKPFATQLM TNGSFNNENI FSEL SRQAAQ VGSTAFGLPR  
 36Scillatoriales\_cyanobacteri GLDPQFNFME VAKPFAMQLM TNGNPSDANI LSEL SRQAAQ VSSTAFGLPR  
 13Volvox\_carteri\_f\_nagariensi TLNPNYRFNE VAQPYAAELL QLQDGRGGAL LEVQQQASE LGAAAAAMP  
 10Arabidopsis\_lyrata\_subsp\_ly ILDPDFSFVK VAAPYAQELL DLKQRRSGTL VQEIRKQADD ARSSTLSMPQ  
 12Physcomitrella\_patens\_subsp\_ TLDPDFSFAK IAAPYAQELL DTRNGRNGSF VEELQRQAND ARDATVQMPQ  
 15Selaginella\_moellendorffii\_E ILDPKFSFAK IAAPYAQ----- TRDATVAMPQ  
 04Phaeodactylum\_tricornutum\_CC TLNPQYDLTK LTLPYLKELL DLKDGAFTT LIRIGKRLGL RPEDINQAPA  
 08Thalassiosira\_pseudonana\_CCM TLDPKYDLTR LTSPYLKELL DLKDGAFTT LSRVLKRAGW RPVDFNMAPA  
 01QUERY\_Bigel\_abc\_86002 TLDKGYDLTR LAVPYLKELL ELREGVVRV VKQYAEKLGW RKEDINALPA  
 463Emiliana\_huxleyi\_Localdb\_\_ GLDPEYDLAK FAQPFIESLQ DSS-EPLAKQ LRVFGTATGL RASDIDTAPA  
 06Thalassiosira\_pseudonana\_CCM GLSDNFDVVGK LAQPFIEKFT EVQKEPAEKN FNIFSKATGL NQADILKAPA  
 07Phaeodactylum\_tricornutum\_CC ELDKDFDIGK LAQPFIEDFT ESSKKEADKN FQIFGKATGL NVDDIETAPA  
 283Aureococcus\_anophagefferens SLDPGYDLTR LSAPYLQELA DLRDGRYKTG VLELLERVGW RPIDVNH LPA  
 83Porphyridium\_cruentum\_Eukary TLDPSYDLTR IAQPYLKDLL DLKDGAFVSI AKSWQKRLGW RWEDIKSLPA  
 295Ectocarpus\_siliculosus\_Loca GLDTKYDLTR LAQPYLKELL DVRDGFALSV AKTFVKKVGVW RPEDLEAVPA  
 537Pyropia\_yezoensis\_Localdb\_\_ GLDPKYDLTL ISAPYLRELV DLKDGAALTV VKSGLKAVGW RPVDLAQTPA  
 75Cyanidioschyzon\_merolae\_Euka ALDPAFDITR LTKPYLRDLI DLRDGIAKTA LKTATKALGW RKEDLASVPA

451

11Micromonas\_sp\_RCC299\_Eukary EIADVRAIE RGR LKIRVRA LEAERALERV QVMQGLMLKM MVACAACNVG  
 230streococcus\_tauri\_Eukaryota DVADILRRIE TGK LKIRVRA LEAERA IERM SIMQGVMMQA VIACAATNIG  
 09Volvox\_carteri\_f\_nagariensi DIAVTMQRLE RGD LKLRVRA LEAERALTRV QAWQRVIAAA LAASTLVNIG  
 60Chlamydomonas\_reinhardtii\_Eu DIALTMQRLE RGD LKLRVRA LEAERALTRV QAWQRVIAAA LAASTLVNIG  
 05Selaginella\_moellendorffii\_E KLADVIERLE QGD LKLRVRT LESERSFKRV SAVQQNIAQA VFAGTFLNLG  
 02Physcomitrella\_patens\_subsp\_ KISNMIQRLE QGD LKLRVRV LESERAFKRV ATMQQTIGQA ILAATCLQIA

|                                |            |            |            |            |             |
|--------------------------------|------------|------------|------------|------------|-------------|
| 03Oryza_sativa_Japonica_Group_ | KLAQIIERLE | QGDLKLRVRT | LESERAFQRV | AAVQKTIGYG | VAAGSLVNLA  |
| 20Gloeobacter_violaceus_PCC_74 | RIEQTLERAD | RGELRVRTKS | IETERLLKRL | NSAAIGGIYS | VLLAAFLICS  |
| 35Synechococcus_sp_PCC_7502_B  | RMEETIVKIE | RGDIKLRVRS | QETDRLLRRL | NGVGTSGIYA | MIGVGLSLVA  |
| 37Synechococcus_elongatus_PCC_ | RLDDTLDKLE | QGDLRVRVRA | SESDRLLRRL | LLTQQSQTWA | ILTAALWIGS  |
| 28Synechococcus_sp_JA-3-3Ab_B  | RLEATLSKLE | QGELRLRVRS | SEAERLLRKL | NSTGRGVIYA | VLFATFFLSA  |
| 40Chamaesiphon_minutus_PCC_660 | RLEDTIDKLE | RGDIRVRVRS | SETDRYLRRL | GTMQQNTNYA | ILVAAF TLSA |
| 29Synechococcus_sp_PCC_7335_B  | RIEDTLDRLD | RGDIRVRVRS | IESDRILRRN | SDLSLANSYT | LLVGTFTLSA  |
| 30Leptolyngbya_sp_PCC_7375_Ba  | RIEDSLDRLD | RGDIRVRVRS | IETDRAIRRL | SSVNLMTNYT | LLLGTFTLSA  |
| 26Microcystis_aeruginosa_PCC_9 | RIDDTIEKLE | RGDIRVRVRS | SESDRLLRRL | GMIQMGTYT  | LLISALLISA  |
| 16Stanieria_cyanosphaera_PCC_7 | RIEDTIDKLE | RGDLRVRVRS | IESERALRRL | SAVQMGTYT  | ILIGALILSA  |
| 27Gloeocapsa_sp_PCC_73106_Bac  | KIEDTIEKLE | RGDVLVRVRS | QESDRLLRRL | GLLQLSTNYT | VLTSAFILAA  |
| 18Cyanothecce_sp_PCC_7822_Bact | RLEDTLDKLE | RGDIRVRVRS | LESERTFRRL | SAIQLGTNYT | LFICSLMISA  |
| 14Pleurocapsa_sp_PCC_7327_Bac  | RIEDTIEKLE | RGDIKVRVRS | SESDRILRRL | SALQLGTNYT | LLIGTFILSA  |
| 39Leptolyngbya_sp_PCC_6406_Ba  | RLEDTLDKLE | RGDIRVRVRS | IETDRILRRV | SGVNMATNYT | LLVGAFLLSA  |
| 33Geitlerinema_sp_PCC_7407_Ba  | RIEDTLGKLE | QGDIVRVVRS | TETDRALRRL | SSVTMGINYM | LLICTFILSA  |
| 31Crinalium_epipsammum_PCC_933 | RIEDTIEKLE | RGDLRVRVRS | TETDRVLRRI | SSVQLGTNYT | LLIGTFTLSA  |
| 21Moorea_producens_3L_Bacteria | RIESTIDKLE | RGDLRIRVRS | IESDRVLRRL | SGIQLGTNYT | LLISAFTLSA  |
| 24Calothrix_sp_PCC_6303_Bacte  | RLEDVIEKLE | RGDVRLRVRA | IETERLLRKQ | SSLQLASVYA | VILSGFTLSA  |
| 22Gloeocapsa_sp_PCC_7428_Bact  | RLEDTLEKLE | RGDIRVRVRS | IETERLLRRQ | SNLQLGTNYT | LIISAFTLSA  |
| 32Chroococciopsis_thermalis_   | RLEDTLEKLE | RGDLRVRVRS | IETERLLRRQ | SSVQVAITYA | LIVSSFTISA  |
| 25Raphidiopsis_brookii_D9_Bact | RLEDTLEKLE | RGDIRLRVRA | LETERLLRRQ | SNIQMGISYA | LIISAFTISA  |
| 17Rivularia_sp_PCC_7116_Bacte  | RLEDTLEKLE | RGDVRVRVRS | IETERLLRRQ | TNIQLGGTYA | LIISGFTLSA  |
| 19Fischerella_sp_JSC-11_Bacte  | RLEDTLEKLE | RGDVRLRVRS | IETERLLRRQ | SNIQLGIAYA | LIISAFTLSA  |
| 34Cyanothecce_sp_PCC_7425_Bact | RLEETLEKLE | NGDIRIRTRS | TETDRILRRL | SSVNMGTNYV | LLIGSFTLSA  |
| 36Oscillatoriales_cyanobacteri | RIEDTLDKLE | RGDIRVRVRS | TETDRILRRM | SSINMGTYT  | LLVCTFTLSA  |
| 13Volvox_carteri_f_nagariensi  | RIEATVAQLE | TGDLKLRVRV | LEGERADRRR | GVLQMATLNT | VACMGLLNVG  |
| 10Arabidopsis_lyrata_subsp_ly  | RIEEFVKELD | SGDLKLRVRV | LESERAARKA | TILQMATMYT | VLGGTLLNIG  |
| 12Physcomitrella_patens_subsp_ | RVDQIMRQLE | SGDLKLRVRS | LEAERAARRA | SVMQEAIINS | LFSVGLANIG  |
| 15Selaginella_moellendorffii_E | HIEKFMQQLE | DGDIKLRVRV | LEAERAARKS | SVLQTTMNL  | VAAATLVNVG  |
| 04Phaeodactylum_tricornutum_CC | RVEDVVTRME | QGDFKLRVRA | LEVERELERS | KLVQKNTFQA | ILSGLLFQGA  |
| 08Thalassiosira_pseudonana_CCM | KIEDITTRLE | KGELKPRVRA | MEVERMIKRN | KLVQSNIFSA | VLSCLFLNSA  |
| 01QUERY_Bigel_abc_86002        | YISNVIRKLE | KGDLKLRTRT | LESERAFERS | AMVQQNQGKL | IVASALLNSA  |
| 463Emiliana_huxleyi_Localdb__  | YLEQTVRAME | QGQLKIRVRS | IENEQALARL | ALSGEVTNKL | LASSILLNLG  |
| 06Thalassiosira_pseudonana_CCM | YIEDTLRSME | RGELKIRVRS | LENEKALERM | ALTQGKMEKL | LVASFLLNLA  |
| 07Phaeodactylum_tricornutum_CC | YIEETMRSME | DGTLKIRTRS | LENEKALERV | GLRQGIMENV | LLGSLFFNMA  |
| 283Aureococcus_anophagefferens | STDASIKRIE | AGDLTLRTRS | VELEAQLTRV | EARQRMFQYG | TVAALALRLA  |
| 83Porphyridium_cruentum_Eukary | YVSQTLEKME | QGDLKVRVRA | SRRQRCAFIG | HIVEKLLQLR | LDQGITLAFI  |
| 295Ectocarpus_siliculosus_Loca | YVEDITRKLE | QGDLKLRVRV | LESERAFERL | ELTQTSMYDA | IAFSTFLNAA  |
| 537Pyropia_zezoensis_Localdb__ | YVERTLRRME | EGELRL---- | -----      | -----      | -----       |
| 75Cyanidioschyzon_merolae_Euka | YIESVLRKIE | TGDLKIRVRT | LEIERSFKLL | SVMVEILGHG | MLASIFMNMA  |

|    |                              |            |             |            |            |
|----|------------------------------|------------|-------------|------------|------------|
| 11 | Micromonas_sp__RCC299_Eukary | VVLYVSGMLL | QAKGVFGVAG  | LFAMQALVAQ | MKLGKLIKKE |
| 23 | Ostreococcus_tauri_Eukaryota | VVMYVSGMLL | QAQCAFQFAG  | LLAFKALTGQ | LKVAKLLKKE |
| 09 | Volvox_carteri_f__nagariensi | TVLSVSALTT | GATASFVGAA  | LFGFMLLKNY | LKVLQLEKKE |
| 60 | Chlamydomonas_reinhardtii_Eu | TVLSVSALTA | GATASFAGAA  | LFGFMLLKNW | LTVVKLEKKE |
| 05 | Selaginella_moellendorffii_E | TLLYINAMRV | QGTAFFCSA   | LFGLKLLVGL | FKVKRLDKQE |
| 02 | Physcomitrella_patens_subsp_ | TMLHLSAITV | PATAAFTGSA  | LFGLQAFIGI | MKVKKLDKQE |
| 03 | Ryza_sativa_Japonica_Group_  | TVLYLNSIRL | PATIAAYSLCA | FFGLQVLVGL | LKVKKLDQQE |
| 20 | Gloeobacter_violaceus_PCC_74 | VVLYTADHIL | EATAAFGLAG  | LLSFALGRVL | LRLQRIDTDL |
| 35 | Synechococcus_sp__PCC_7502_B | TILFVTDWYW | LAAIALILGS  | ICIITSLRML | ARMDRMEKMF |
| 37 | Synechococcus_elongatus_PCC_ | AIVSLSALPL | LAIAPFGLGL  | IPLGLLIRTQ | LRLRRSERMG |
| 28 | Synechococcus_sp__JA-3-3Ab_B | TQLFSAGHAT | LAIIVTLALAV | LAALALVRVL | LKANGSEPLM |
| 40 | Chamaesiphon_minutus_PCC_660 | TILFVNAQAI | PAGVVGMAA   | IALVAWFRQM | RKLDQRDRMS |
| 29 | Synechococcus_sp__PCC_7335_B | TLLLIFEYTL | AALIMGAIIV  | LSGVTLIRLL | MRIKKADRMF |
| 30 | Leptolyngbya_sp__PCC_7375_Ba | TLLLISQLPW | VALGMILPAI  | ASGIALVRAL | MRLGRTDRMP |
| 26 | Microcystis_aeruginosa_PCC_9 | TLLFISGFGW | LTLVPMASL   | LPGIALLRWL | RKIERQDRMM |
| 16 | Stanieria_cyanosphaera_PCC_7 | TLLFVNGSIN | LAAIAAGLAL  | VPAWALLRLY | RKIDRSRDMF |
| 27 | Gloeocapsa_sp__PCC_73106_Bac | TILLVNGYVK | IAIAAILIAL  | VPAFALLRLL | RRIDRLDRMF |
| 18 | Cyanothece_sp__PCC_7822_Bact | TLLFVHQYVT | IAVVLLVAI   | FPAWALFRL  | RQLDRLDRMF |
| 14 | Pleurocapsa_sp__PCC_7327_Bac | TILYVYGKQV | AAIAVLLLAI  | APAWAFFRL  | RRLDRLDRMF |
| 39 | Leptolyngbya_sp__PCC_6406_Ba | TILLVYEWLW | LAIAAAIVAT  | VAGFALVRL  | LRIGRADRLP |
| 33 | Geitlerinema_sp__PCC_7407_Ba | TILFVHGKGW | LAGAALVAAG  | AIAFFLIRMF | KRIDRYDRMF |
| 31 | Crinalium_epipsammum_PCC_933 | TILLVNNYVW | LAGVVAFAIV  | SLLVILIRLL | MRLDKFDRTF |
| 21 | Moorea_producens_3L_Bacteria | TILFVNGNVV | LALVVVLVAA  | MLGFALIRLL | RRLDRFDRML |
| 24 | Calothrix_sp__PCC_6303_Bacte | SILLIKDYIW | LAVGAGLIAA  | FVSWLLIRLL | LRLDRNDRSY |
| 22 | Gloeocapsa_sp__PCC_7428_Bact | TLLFVNHYIW | LAIIAAAIAA  | VVGVALVRL  | IRLDYDRMY  |
| 32 | Chroococciopsis_thermalis_   | TILLISQFAW | LALIPGIAAA  | GTGFSLIRLL | MRLDRYDKMF |
| 25 | Raphidiopsis_brookii_D9_Bact | TILLVNRFYW | LATIAGLIVA  | GISFIFLRLV | SRLDRYDQKY |
| 17 | Rivularia_sp__PCC_7116_Bacte | TILLVHDYVW | FALVAGLIAA  | AVSWMLIRLL | LRLDRYDRMY |
| 19 | Fischerella_sp__JSC-11_Bacte | TILFVNNYFW | QAVFIGLIAT  | AVLWLLIRLL | MRLDRYDRMY |
| 34 | Cyanothece_sp__PCC_7425_Bact | TILLVNQFAG | LAAIAATIAV  | LATIAYIRLL | LRLDKYERML |
| 36 | Scillatoriales_cyanobacteri  | TILLVNGYVW | LAVIAGLAAL  | IAGFVLLRLM | MRIDRADRMP |
| 13 | Volvox_carteri_f__nagariensi | TMLAISGGPG | AAAAVATGSA  | VFGVLVFRGL | KRVQRDLKFE |
| 10 | Arabidopsis_lyrata_subsp__ly | VTFSNQGSQ  | VANGSFIGAG  | IFMALVLRSM | QRVNKLDKFE |
| 12 | Physcomitrella_patens_subsp_ | VTLSTQGITA | VSNSSFVGAG  | IFLLLLANNV | RRIRNLKFE  |
| 15 | Selaginella_moellendorffii_E | VTLSTQGLQD | FAIASFLGAG  | K-----     | -----      |
| 04 | Phaeodactylum_tricornutum_CC | VSLATVGSGL | YAATLFAVSA  | VLGIQIPFGI | FRLRKLKDYN |
| 08 | Thalassiosira_pseudonana_CCM | MSVAVLGQNM | L-----      | -----      | -----      |
| 01 | QUERY_Bigel_abc_86002        | MSMFSTAPAV | ASQAAFGLAI  | FFALQFPLGA | LKVSFDDKKS |

l-abc.txt

|                                |            |            |            |            |            |
|--------------------------------|------------|------------|------------|------------|------------|
| 463Emiliana_huxleyi_Localdb__  | L---       | AGVGAV     | PRAVWFAAAA | VMGAQTAAAN | LKISLFDKKA |
| 06Thalassiosira_pseudonana_CCM | G---       | VATNRL     | LRSAGVVGAV | AFGLQAFMAS | AKLKKFDKTQ |
| 07Phaeodactylum_tricornutum_CC | G---       | LASRTV     | FRTAGIVGAS | FFLFQALMAN | AKVKKFDKTQ |
| 283Aureococcus_anophagefferens | TLALAEAPLK | YAALGAAWAA | AEGFGAYCAL | CKLDKNQRRF |            |
| 83Porphyridium_cruentum_Eukary | L-DTSGASEV | FFSVSDADPS | ISSFSSPTRS | -SAPLSSSSS |            |
| 295Ectocarpus_siliculosus_Loca | LTLSAGSPLL | PVRVAWTLAG | VFGLRIPVGL | FKIRKQDQKY |            |
| 537Pyropia_yezoensis_Localdb__ | -----      | -----      | -----      | -----      |            |
| 75Cyanidioschyzon_merolae_Euka | L-----     | AGV        | FASACYLGAA | VCGVRALVGF | LNLRIIQQRQ |

Alignment: GGR

|                                |            |            |            |            |            |
|--------------------------------|------------|------------|------------|------------|------------|
| 009Lotharella_amoeboformis_Euk | -----      | -----      | -----      | -----      | -----      |
| 101Cyanidioschyzon_merolae_Euk | KFRVAVVGGG | PAGACAAEAL | ARCEIETFLI | ERKMDNCKPC | GGAIPLCMVD |
| 120Emiliana_huxleyi_Localdb__  | PLRVAVVGGG | PSGACAAEIF | AKANIDCTLF | ERKMDNCKPC | GGAIPLCMVD |
| 006Isochrysis_galbana          | --RVAVVGGG | PAGACAAEIF | AQANIECTMF | ERKMDNCKPC | GGAIPLCMVE |
| 001QUERY_ggr                   | KYRVAVIGGG | PSGSAAEIF  | AKEGIDTFIF | ERKMDNVKPC | GGAIPLCMVD |
| 003Guillardia_theta            | KMRVAIVGGG | PSGSCAAEIF | AQENIDTYIF | ERKMDNAKPC | GGAIPLCMIE |
| 004Ectocarpus_siliculosus      | KYKVAVVGGG | PSGSCAAEIL | ADCVDVTLF  | ERKMDNAKPC | GGAIPLCMID |
| 005Aureococcus_anophagefferens | KYRVAVVGGG | PSGACAAEIC | AQENIETYII | ERKFDNAKPC | GGAIPLCMVD |
| 010Thalassiosira_pseudonana_CC | KYKVAVVGGG | PSGACAAEIF | AQEGIDTVMF | ERKMDNAKPC | GGAIPLCMIG |
| 011Phaeodactylum_tricornutum_C | KYKVAVVGGG | PAGACAAEIF | AQEGIDTVLF | ERKLDNAKPC | GGAIPLCMVG |
| 036Brachypodium_distachyon_Euk | RLRVAVVGGG | PAGGAAAAL  | AKGGVETVLI | ERKMDNCKPC | GGAIPLCMVS |
| 031Selaginella_moellendorffii_ | KLRVAVIGGG | PAGGCAAETL | AKNGIETFLI | ERKMDNAKPC | GGAIPLCMVG |
| 021Physcomitrella_patens_subsp | KLRVAVVGGG | PAGGCAAETL | AMGGIETFLI | ERKLDNAKPC | GGAIPLCMVG |
| 015Ostreococcus_tauri_Eukaryot | KLRVAVIGGG | PAGACAAETL | AKGGCETYLI | ERKMDNCKPC | GGAIPLCMVG |
| 028Micromonas_pusilla_CCMP1545 | -----      | -----      | -----      | ---MDNCKPC | GGAIPLCMVG |
| 012Volvox_carteri_f_nagariens  | KLRVAVIGGG | PSGACAAETL | AKGGVETYLI | ERKLDNCKPC | GGAIPLCMVE |
| 013Chlamydomonas_reinhardtii_E | KLRVAVIGGG | PSGACAAETL | AKGGVETVLL | ERKLDNCKPC | GGAIPLCMVE |
| 007Pyropia_yezoensis           | --RVAVVGGG | PAGSCCAEEL | AKAGIEVTLF | ERKMDNAKPC | GGAIPLCMVD |
| 019Synechococcus_elongatus_PCC | ALRVAVVGGG | PAGSCAAETL | VKAGIETYLI | ERKLDNAKPC | GGAIPLCMVS |
| 035cyanobacterium_UCYN-A_Bacte | VLRVAVVGS  | PAGSSAAETL | VKAGIETYLF | ERNLSYVKPC | GGAIPLCMVD |
| 024Thermosynechococcus_elongat | SLRVAVVGGG | PAGSSAAETL | AKAGIQTYLF | ERKLDNAKPC | GGAIPLCMVS |
| 014Cyanotheca_sp_PCC_7425_Bac  | ALRVAVVGGG | PAGSSAAEVL | ARAGIETYLI | ERKLDNVKPC | GGAIPLCMVS |
| 032Acaryochloris_sp_CCMEE_541  | ALRVAVVGS  | PAGSSAAETL | VKAGIETYLF | ERKLDNAKPC | GGAIPLCMVD |
| 020Microcoleus_vaginatus_FGP-2 | TLRVAVVGS  | PAGSSAAETL | VKAGIETYLF | ERKLDNAKPC | GGAIPLCMVS |
| 030Trichodesmium_erythraeum_IM | TLRVAVVGS  | PAGSSAAETL | VKAGIETYLF | ERKLNNKPC  | GGAIPLCMVS |
| 025Lyngbya_sp_PCC_8106_Bacter  | TLRVAVVGS  | PAGSSAAETL | VKAGIETYLF | ERKLDNAKPC | GGAIPLCMVS |
| 018Cylindrospermopsis_racibors | TLRVAVVGS  | PAGSSAAETL | AKAGIETYLF | ERKLDNAKPC | GGAIPLCMVS |
| 017Fischerella_sp_JSC-11_Bact  | TLRVAVVGS  | PAGSSAAETL | AKAGIETYLF | ERKLDNAKPC | GGAIPLCMVS |
| 027Nostoc_azollae_0708_Bacteri | TLRVAVVGS  | PAGSSAAETL | AKAGIETYLI | ERKLDNAKPC | GGAIPLCMVS |
| 023Microcoleus_chthonoplastes_ | ALRVAVVGS  | PAGSSAAETL | AKAGIETYLF | ERKLDNAKPC | GGAIPLCMVS |
| 026Cyanotheca_sp_PCC_7822_Bac  | MLRVAVVGS  | PAGSSAAETL | AKAGIETYLF | ERKLDNAKPC | GGAIPLCMVS |
| 008Galdieria_sulphuraria       | -----      | -----      | ---GIETFIF | ERKFDNAKPC | GGAIPLCMIE |
| 002Cyanophora_paradoxa         | KLRVAIVGGG | PAGSCAADVL | AKAGIETYLF | ERKLDNAKPC | GGAIPLCMVS |

51

|                                |            |            |            |            |            |
|--------------------------------|------------|------------|------------|------------|------------|
| 009Lotharella_amoeboformis_Euk | -----      | -----      | -----      | -----      | -----      |
| 101Cyanidioschyzon_merolae_Euk | EFGLPPDIID | RKVRRLMVS  | PSGREIPVRT | LKPHEYIGMT | RREILDSYLR |
| 120Emiliana_huxleyi_Localdb__  | EFELPPEIVD | RRVRKMKMIS | PSGREVDVRT | LKENEYIGMT | RREVLDAYLR |

|     |                                    |             |            |            |            |             |
|-----|------------------------------------|-------------|------------|------------|------------|-------------|
| 006 | <i>Isochrysis_galbana</i>          | EFSLPPDIVD  | RRVRKMKMIS | PSGREVDVRT | LKEDEYIGML | RREVMCKYLR  |
| 001 | QUERY_ggr                          | EFDLPESVID  | RKVRKMKMIS | PSNRVVDVRT | LKPNEYIGMC | RREVLDFGMR  |
| 003 | <i>Guillardia_theta</i>            | EFQIPEEVVD  | RKVRKMLMIS | PTGKEAPIQT | LRDDEYIGMT | RREILDGFLR  |
| 004 | <i>Ectocarpus_siliculosus</i>      | EFDLPSTIID  | RKVRKMKMIS | PTNREVDIQT | LGDDEYIGMV | RREVMDFGMR  |
| 005 | <i>Aureococcus_anophagefferens</i> | EFDLPADIID  | RKVRKMKMIS | PSNREVDIKT | LKEDEYIGMC | RREVMDFGMR  |
| 010 | <i>Thalassiosira_pseudonana_CC</i> | EFDIPESTVD  | RKVRRMKLIS | PSNNEVDIDT | LQPNEYIGMC | RREIMCKYLR  |
| 011 | <i>Phaeodactylum_tricornutum_C</i> | EFDLPESVVD  | RKVRRMNLIS | PKGVEVDIET | LKPDEYIGMT | RREILDGYLR  |
| 036 | <i>Brachypodium_distachyon_Euk</i> | EFDLPLDLVD  | RKVTKMKMIS | PSNVAVDIRT | LAPHEYIGMV | RREVLDDFLR  |
| 031 | <i>Selaginella_moellendorffii</i>  | EFDLPLDIID  | RKVTKMKMIS | PSNVAVDVKT | LNENEYIGMV | RREVLDSYLR  |
| 021 | <i>Physcomitrella_patens_subsp</i> | EFDLPPEIID  | RKVTKMKMIS | PSNVAVDVKT | LNDDEYIGMV | RREVLDSFLR  |
| 015 | <i>Ostreococcus_tauri_Eukaryot</i> | EFDLPPEIID  | RKVTKMKMIS | PSNRAVDVQT | LNDKEYIGMC | RREVMDDFLR  |
| 028 | <i>Micromonas_pusilla_CCMP1545</i> | EFDLPPEIID  | RKVTKMKMIS | PSNRAVDVQT | LNDKEYIGMC | RREVMDDFLR  |
| 012 | <i>Volvox_carteri_f_nagariens</i>  | EFDLPLEIID  | RKVTKMKMIS | PSNREVDVKT | LSETEWIGMC | RREVFDDFLR  |
| 013 | <i>Chlamydomonas_reinhardtii_E</i> | EFDLPMEIID  | RRVTKMKMIS | PSNREVDVKT | LSETEWIGMC | RREVFDDYLR  |
| 007 | <i>Pyropia_zezoensis</i>           | EFSLPPEIID  | RKVRKMAMIS | PSNKVSQIAT | LKPHEYIGMT | RREILDGYLR  |
| 019 | <i>Synechococcus_elongatus_PCC</i> | EFDLPAAEIID | RRVRNMKMS  | PSNREVNINL | DNADEYIGMT | RREVLDFGFLR |
| 035 | <i>Cyanobacterium_UCYN-A_Bacte</i> | EFELPPTIID  | RRVRKMKMIS | PSNIEVDLNL | DNKDEYIGMC | RREILDGFLR  |
| 024 | <i>Thermosynechococcus_elongat</i> | EFDLPPEIID  | RRVRKMKMIS | PSNIEVNIHT | LKEHEYIGMC | RREVLDSFMR  |
| 014 | <i>Cyanothece_sp_PCC_7425_Bac</i>  | EFDLPPEIID  | RRVRKMKMIS | PSNIEVNIST | LKQDEYIGMC | RREVLDFGFLR |
| 032 | <i>Acaryochloris_sp_CCME541</i>    | EFDLPLEIID  | RQVRKMRMIS | PSNVEVDINI | KNEGEYIGMC | RREVLDFGMR  |
| 020 | <i>Microcoleus_vaginatus_FGP-2</i> | EFDLPQSIID  | RQVRKMKMIS | PSNVEVDINI | ENAHEYIGMC | RREVLDFGMR  |
| 030 | <i>Trichodesmium_erythraeum_IM</i> | EFDLPPEIID  | RRVRKMKMIS | PSNVEVDIHI | EKEDEYIGMC | RREVLDFGFLR |
| 025 | <i>Lyngbya_sp_PCC_8106_Bacter</i>  | EFDLPPEIID  | RRVRKMKMIS | PSNREVDINL | INENEYIGMC | RREVLDFGMR  |
| 018 | <i>Cylindrospermopsis_racibors</i> | EFDLPADIID  | RRVRNMKMS  | PSNREVDINL | INQEEYIGMC | RREVLDFGFLR |
| 017 | <i>Fischerella_sp_JSC-11_Bact</i>  | EFDLPQDIID  | RQVRKMKMIS | PSNREVDINL | VKQEEYIGMC | RREVLDFGFLR |
| 027 | <i>Nostoc_azollae_0708_Bacteri</i> | EFDLPPEIID  | RRVRKMKMIS | PSNREVDINL | VNEEEYIGMC | RREVLDFGFLR |
| 023 | <i>Microcoleus_chthonoplastes_</i> | EFDLPPEIID  | RRVRKMKMIS | PSNIEVDINL | VKEDEYIGMC | RREILDGFM   |
| 026 | <i>Cyanothece_sp_PCC_7822_Bac</i>  | EFDLPPEIID  | RRVRKMKMIS | PSNIEVDINL | DNQEEYIGMC | RREVLDFGMR  |
| 008 | <i>Galdieria_sulphuraria</i>       | EFSLPLDIVD  | RKVRRMKMS  | PSNREVDIKT | LKPHEYIGMT | RREVLDSFLR  |
| 002 | <i>Cyanophora_paradoxa</i>         | EFDLPESIID  | RKVTRMKMIS | PSNVEVDIQT | LKPNEYIGMT | RREVLDFGFLR |

101

|     |                                    |            |            |            |            |            |
|-----|------------------------------------|------------|------------|------------|------------|------------|
| 009 | <i>Lotharella_amoeboformis_Euk</i> | -----      | -----      | -----      | -----      | -----      |
| 101 | <i>Cyanidioschyzon_merolae_Euk</i> | ERAYELGAIK | VHGLVQVEVL | PDPRDGKYRI | KYADYKIDGG | RATTSSLEVD |
| 120 | <i>Emiliana_huxleyi_Localdb_</i>   | DRAVELGAKP | VTGLVQKVEF | -EDANGPYTI | KYSEYKPGEK | KGTPSEAEFD |
| 006 | <i>Isochrysis_galbana</i>          | DRAVQFGATP | VNGLVQKVEF | -ADTDGPYTI | KYTKYEEGTP | KGTPAEAEFD |
| 001 | QUERY_ggr                          | NRSVDLGAVP | INGLVTKIDV | PRGSDPYVI  | HYQDYKTAGG | AGTPKTMEFD |
| 003 | <i>Guillardia_theta</i>            | DRAIKLGAKP | INGLVTKIDL | PEGNSKPYKI | HYTNY-NGQK | VGTPEELDVD |
| 004 | <i>Ectocarpus_siliculosus</i>      | DRAIEKGAHA | INGLVNDIDV | PADKDGKYKI | HFARYEKGSR | KGVDQSEEFD |
| 005 | <i>Aureococcus_anophagefferens</i> | DRAVEYGAIP | INALVTKIDT | PADSDGRYTI | HYSRNDLG-R | KAPEESLDVD |



|                                |             |             |             |             |            |
|--------------------------------|-------------|-------------|-------------|-------------|------------|
| 010Thalassiosira_pseudonana_CC | DRAISYGAEP  | INGLVTAIDV  | PEDHKKQYTL  | HYQEFQAGSS  | AGVPKSMNVD |
| 011Phaeodactylum_tricornutum_C | DRAIDYGAEI  | VNGLVTSIDI  | PADHKNQYTI  | NYQAYEEGSS  | AGTPKNMKVD |
| 036Brachypodium_distachyon_Euk | TRAQKAGAEV  | LNGLFRLRYEA | PKEANGTYTV  | HYNHYDSSSG  | KGEKRSFEVD |
| 031Selaginella_moellendorffii_ | ERAASFANL   | VNGLFLRMEM  | PSDANAPYVL  | HYNLYKPGSS  | VGVPATLEVD |
| 021Physcomitrella_patens_subsp | ERAQKNGATI  | INGLFLRMEV  | PKDNDSPYKL  | HYTNFDGSSK  | VGTPAVLEVD |
| 015Ostreococcus_tauri_Eukaryot | KRANSLGANL  | VNGLFMKIED  | PGQGNGPILV  | QYNDYEEESK  | TGVPKTLEVD |
| 028Micromonas_pusilla_CCMP1545 | KRAKSLGTNL  | VNGLFMKLED  | PGQGNGAITI  | HYNDYEADSK  | VGEPKTMEVD |
| 012Volvox_carteri_f_nagariens  | KRAEKLGANI  | VNGLFMRSEK  | -QGSDDPFTI  | HYTSYADGSK  | MGTPSTLEVD |
| 013Chlamydomonas_reinhardtii_E | NRAAKLGANI  | VNGLFMRSEQ  | -QSAEGPFTI  | HYSYEDGSK   | MGKPATLEVD |
| 007Pyropia_zezoensis           | DRAISLGAKP  | INGLVTDIKI  | PSNSSEPYVI  | SYSDYAEGGA  | QG--KTLEVD |
| 019Synechococcus_elongatus_PCC | DRAAKLGTKL  | INGTLFRLEL  | PKGDRDPYVL  | HYADHSNGSL  | EGIPSTLEVD |
| 035cyanobacterium_UCYN-A_Bacte | DRAVELGANL  | INGTVYQLDT  | PQNSQDPYTI  | YYADHSNGQA  | LGEKKTLEVD |
| 024Thermosynechococcus_elongat | NRAADLGANL  | INGTVFKLEQ  | PTTSDRPYTL  | HYVQED----- | -GTAQTLEVD |
| 014Cyanothecce_sp_PCC_7425_Bac | DRAAHCGATV  | INGTMHTLDL  | PSNDRDPYVL  | HYADHSNGSA  | AGENKTLKVD |
| 032Acaryochloris_sp_CCMEE_541  | DRAAKLGAKL  | INGTVNKLDF  | PTGANQPYTI  | HYADLTGGRA  | EGVMKTLQVD |
| 020Microcoleus_vaginatus_FGP-2 | DRAASLGAKL  | INGTVHKLEI  | PGNNTDPYTL  | HYADHSDGSA  | MGIQKTLKVD |
| 030Trichodesmium_erythraeum_IM | DRAASLGANL  | INGTVYKLDL  | PNNDRPYTI   | HYSNHSQDGI  | QGTAKTLKVD |
| 025Lyngbya_sp_PCC_8106_Bacter  | DRAAKLGANL  | INGTVYKLDI  | PTKKNEAYTL  | HYTDHSEGENS | RGTAKTLKVD |
| 018Cylindrospermopsis_racibors | NRAAKLGANL  | INATVHKLDI  | PNNNSDPYTI  | HYVDHNEGGS  | VGVAKTLKVD |
| 017Fischerella_sp_JSC-11_Bact  | NRAAKLGANL  | INATVHKLDI  | PRNNTDPYTI  | HYVDHTEGGA  | QGIKTLKVD  |
| 027Nostoc_azollae_0708_Bacteri | ERAAKLGANL  | INATVHKLDI  | PTNNTDPYTI  | HYVDHTEGGA  | QGITKTLKVD |
| 023Microcoleus_chthonoplastes_ | NRAAKLGATL  | INGTVHKLDI  | PTSNTPEPYTL | HYADHSDGSL  | SGVQKTLKVD |
| 026Cyanothecce_sp_PCC_7822_Bac | NRAAKLGATL  | INATVYKLDI  | PTNNTDPYTI  | HYADHSDGSI  | EGIKKTLKVD |
| 008Galdieria_sulphuraria       | ERAIQLGAQP  | IHGLVTDIIL  | PKTDREPYII  | CYSDFSENG-  | IGKPNTLEVD |
| 002Cyanophora_paradoxa         | ERAEEK-NTKV | INGLFLSMDK  | PKSGDGAYTL  | HFTDYSNG-I  | KGEPNSIDVD |

## 151

|                                |            |            |            |            |            |
|--------------------------------|------------|------------|------------|------------|------------|
| 009Lotharella_amoebiformis_Euk | -----ANS   | RVAKAIDAGE | YNYAIAFQER | IAINDEQMKY | YEELAEMYVG |
| 101Cyanidioschyzon_merolae_Euk | MVVGADGANS | RVAKAIDAGD | YSYAIAFQER | IKIPDDKMAF | YEDLAEMYVG |
| 120Emiliana_huxleyi_Localdb__  | IIVGADGANS | RTAKAIDAGE | YNFAIAFQER | IKIPDEKMKY | YEDLAEMYVG |
| 006Isochrysis_galbana          | IIVGADGANS | RTAKAIDAGE | YNYAIAFQER | IKIADEKMEY | YEDLAEMYVG |
| 001QUERY_ggr                   | VLVGADGANS | RVAKAIDAGE | YNYAIAFQER | IAIDEEKMEY | YKDLAEMYVG |
| 003Guillardia_theta            | LIIGADGANS | RVAKAIDAGE | YNYAIAFQER | IRINDQQMAF | YEELAEMYVG |
| 004Ectocarpus_siliculosus      | LIIGSDGANS | RVAKAMDAGA | YNYAIAFQER | IKISEKKMEF | YEEMAEMYVG |
| 005Aureococcus_anophagefferens | VIIGADGANS | RVAKAIDAGE | YNFAIAFQER | IKIDDEKMAF | YDELAEMYVG |
| 010Thalassiosira_pseudonana_CC | LIIGADGANS | RVAKAMDAGE | YNFAIAFQER | IKITDEQMSF | YEEMAEMYVG |
| 011Phaeodactylum_tricornutum_C | LIVGADGANS | RVAKAMDAGQ | YNFAIAFQER | IKIPDDKMKF | YEEMAEMYVG |
| 036Brachypodium_distachyon_Euk | AIVGADGANS | RVAKDMGAGD | YEYAIAFQER | VKIPDDKMRY | YEERAEMYVG |
| 031Selaginella_moellendorffii_ | AVIGADGANS | RVAKDIDAGD | YDYAIAFQER | IKIPDDKMVY | YENLAEMYVG |
| 021Physcomitrella_patens_subsp | AVIGADGANS | RVAKDIDAGE | YDYAIAFQER | IKIPADKMEY | YENLAEMYVG |

|      |                             |            |            |            |            |            |
|------|-----------------------------|------------|------------|------------|------------|------------|
| 0150 | streococcus_tauri_Eukaryot  | VVIGADGANS | RVAKCIDAGE | YDYAIAFQER | IKIPDEKMEY | YKDLAEMYVG |
| 028  | Micromonas_pusilla_CCMP1545 | CIIGADGANS | RVAKNIDAGE | YDYAIAFQER | IKIPDEKMEY | YKDLAEMYVG |
| 012  | Volvox_carteri_f_nagariens  | MIIGADGANS | RVAKEIDAGE | YDYAIAFQER | IRIPDDKMKY | YENLAEMYVG |
| 013  | Chlamydomonas_reinhardtii_E | MIIGADGANS | RIAKEIDAGE | YDYAIAFQER | IRIPDDKMKY | YENLAEMYVG |
| 007  | Pyropia_zezoensis           | YIIGADGANS | RVAKAIDAGD | YQYAIAFQER | IKLPAAQMEY | YEELAEMYVG |
| 019  | Synechococcus_elongatus_PCC | VVIGADGANS | RIAKAIDAGD | YNYAIAFQER | IRLPEDKMHY | YENLAEMYVG |
| 035  | cyanobacterium_UCYN-A_Bacte | VIIGADGANS | RIAKFIDAGD | YNYAIAFQER | IRLPKDKMNR | YEDLAEMYVG |
| 024  | Thermosynechococcus_elongat | VVIGADGANS | RIAKEIDAGD | YNYAIAFQER | IRLPEDKMAY | YNELAEMYVG |
| 014  | Cyanothece_sp_PCC_7425_Bac  | LVIGADGANS | RVARAIDAGD | YNYAIAFQER | IRLPEDKMAY | YEDLAEMYVG |
| 032  | Acaryochloris_sp_CCMEE_541  | LVIGADGANS | RIAKEIKAGD | YNYAIAFQER | IRLPDEYMA  | YQDRAEMYVG |
| 020  | Microcoleus_vaginatus_FGP-2 | LVIGADGANS | RVAKAIDAGD | YNYAIAFQER | IRLPEDKMAY | YEDLAEMYVG |
| 030  | Trichodesmium_erythraeum_IM | LVIGADGANS | RVAKAIDAGD | YNYAIAFQER | IRLPDHLMA  | YEDLAEMYVG |
| 025  | Lyngbya_sp_PCC_8106_Bacter  | LVIGADGANS | RIAKAIDAGD | YNYAIAFQER | IRISDEKMA  | YQDRAEMYVG |
| 018  | Cylindrospermopsis_racibors | LIIGADGANS | RIAKEMDAGD | YNYAIAFQER | IRLPEDKMAY | YNNLAEMYVG |
| 017  | Fischerella_sp_JSC-11_Bact  | LIIGADGANS | RIAKEIDAGD | YNYAIAFQER | IRLPQEQMA  | YNDLAEMYVG |
| 027  | Nostoc_azollae_0708_Bacteri | LVIGADGANS | RIAKEMDAGD | YNYAIAFQER | IRLPQDKMA  | YNDMAEMYVG |
| 023  | Microcoleus_chthonoplastes_ | LVIGADGANS | RVAKAIDAGN | YNYAIAFQER | IRLPGDMNY  | YEDLAEMYVG |
| 026  | Cyanothece_sp_PCC_7822_Bac  | VVIGADGANS | RIAKAIDAGD | YNYAIAFQER | IRLPQDKMA  | YEDMAEMYVG |
| 008  | Galdieria_sulphuraria       | MIIGADGANS | RVAKVIDAGD | YNYAIAFQER | IRLPPEKMA  | YEELAEMYVG |
| 002  | Cyanophora_paradoxa         | MVIGADGANS | RVAKEIDAGD | YEYAMAFQER | IRLPKDKMEF | YENLAE-YVG |

## 201

|      |                             |            |            |            |            |            |
|------|-----------------------------|------------|------------|------------|------------|------------|
| 009  | Lotharella_amoeboformis_Euk | DDVS-DFY-W | VFPKYDHVGV | GT-----    | --KYQKAIRE | RCKERIEGGK |
| 101  | Cyanidioschyzon_merolae_Euk | DDVSPDFYAW | VFPKYDHVGV | GTGTVIDKPN | IKRYKEGIRQ | RAAPKIAGGK |
| 120  | Emiliana_huxleyi_Localdb__  | DDVSPDFYAW | VFPKYDHVGV | GTGTVVNRPA | ISEYQAAIRE | RCADRLGDPK |
| 006  | Isochrysis_galbana          | DDVSPDFYAW | VFPKYDHVGV | GTGTVVNRPA | ISEYQAAIRE | RCAEKLGDPK |
| 001  | QUERY_ggr                   | DDVSPDFYAW | VFPKYDHVGV | GTGTVVNRPD | IPKYQKAIRE | RAKDRLEGGK |
| 003  | Guillardia_theta            | DDVSPDFYGW | VFPKYDHVGV | GTGTVVNRPA | IKQYQNAIRE | RAGKKIEGGK |
| 004  | Ectocarpus_siliculosus      | DDVSPDFYGW | VFPKYDHVGV | GTGTVVNRPK | IKDYQDAIRK | RAGEKIEGGK |
| 005  | Aureococcus_anophagefferens | DDVSPDFYGW | VFPKYDHVGV | GTGTVINRPG | IKMYQDAIRE | RAGDKIAGGK |
| 010  | Thalassiosira_pseudonana_CC | DDVSPDFYGW | VFPKYDHVGV | GTGTVVNRPA | IKQYQKAMRD | RAGDKIAGGK |
| 011  | Phaeodactylum_tricornutum_C | DDVSPDFYGW | VFPKYDHVGV | GTGTVVNRPA | IKQYQKAIRD | RAGDKIAGGK |
| 036  | Brachypodium_distachyon_Euk | DDVSPDFYGW | VFPKCDHVAV | GTGTVTHKAD | IKKFQAATRL | RAKDKIDGGR |
| 031  | Selaginella_moellendorffii_ | DDVSPDFYGW | VFPKCDHVAV | GTGTVINKPA | IKKYQVATRH | RARDKIAGGK |
| 021  | Physcomitrella_patens_subsp | DDVSPDFYGW | VFPKCDHVAV | GTGTVINKPS | IKKYQTATRN | RAKDKIAGGK |
| 0150 | streococcus_tauri_Eukaryot  | DDVSPDFYGW | VFPKYDHVAV | GTGTVVNKTA | IKQYQTAMRN | RAEEKCEGGK |
| 028  | Micromonas_pusilla_CCMP1545 | DDVSPDFYGW | VFPKYDHVAV | GTGTVVNKTA | IKTYQAAMRK | RAEKCAGGK  |
| 012  | Volvox_carteri_f_nagariens  | DDVSPDFYGW | VFPKYDHVAV | GTGTVVNKTA | IKQYQQATRD | RSKVKTEGGK |
| 013  | Chlamydomonas_reinhardtii_E | DDVSPDFYGW | VFPKYDHVAV | GTGTVVNKTA | IKQYQQATRD | RSKVKTEGGK |
| 007  | Pyropia_zezoensis           | DDVSPDFYAW | VFPKYDHVGV | GTGTVIDRPS | IKKYQQAIRT | RAADKLAGGK |

|     |                                    |            |            |            |            |             |
|-----|------------------------------------|------------|------------|------------|------------|-------------|
| 019 | <i>Synechococcus_elongatus_PCC</i> | GDVSPDFYAW | VFPKYDHVAV | GTGTMVNQRL | IKKLQAGIRA | RAANRLEGGK  |
| 035 | <i>cyanobacterium_UCYN-A_Bacte</i> | KDVSPDFYAW | IFPKYDHVAV | GTGTMNNQAM | IKKLQAGIRS | RAFSRLEGGE  |
| 024 | <i>Thermosynechococcus_elongat</i> | DDVSPDFYAW | VFPKYDHVAV | GTGTMVNKDR | IRELQAGIRS | RAAAKLEGGQ  |
| 014 | <i>Cyanothece_sp__PCC_7425_Bac</i> | DDVSPDFYAW | VFPKYDHVAV | GTGTMPNQAR | IKQLQAGIRE | RAAAKLRGGK  |
| 032 | <i>Acaryochloris_sp__CCMEE_541</i> | DDVSTDFYAW | VFPKYDHVAV | GTGTMVNQAD | IKKLQAGIRA | RAAHLVGGGE  |
| 020 | <i>Microcoleus_vaginatus_FGP-2</i> | DDVSTDFYAW | VFPKYDHVAV | GTGTMVNQAS | IKKLQAGVRA | RAAKKLMGGE  |
| 030 | <i>Trichodesmium_erythraeum_IM</i> | DDVSPDFYAW | VFPKYDHVAV | GTGTMVHQAK | IKQLQAGIRA | RAAKRLEGGQ  |
| 025 | <i>Lyngbya_sp__PCC_8106_Bacter</i> | NDVSPDFYAW | VFPKYDHVAV | GTGTMVNQAM | IKQLQAGIRA | RAAHRIEGGK  |
| 018 | <i>Cylindrospermopsis_racibors</i> | DDVSTDFYAW | IFPKYDHVAV | GTGTMVNKAS | IKQLQAGIRA | RAAEKLAGGT  |
| 017 | <i>Fischerella_sp__JSC-11_Bact</i> | DDVSTDFYAW | VFPKYDHVAV | GTGTMVNKAS | IKQLQAGIRA | RAARKLVGGQ  |
| 027 | <i>Nostoc_azollae_0708_Bacteri</i> | NDVSTDFYAW | VFPKYDHVAV | GTGTMVNKAN | IKQLQAGIRA | RASKKLAGGQ  |
| 023 | <i>Microcoleus_chthonoplastes_</i> | NDVSPDFYAW | VFPKYDHVAV | GTGTMVNQAK | IKKLQAGIRA | RAAKKLVGGGE |
| 026 | <i>Cyanothece_sp__PCC_7822_Bac</i> | KDVSPDFYAW | VFPKYDHVAV | GTGTMVNKAM | IKDLQAGIRT | RAARKLEGGE  |
| 008 | <i>Galdieria_sulphuraria</i>       | DDVSPDFYAW | VFPKYDHVGV | GTGTVLDRPS | IKKYQAAIRR | RAASKLNGGH  |
| 002 | <i>Cyanophora_paradoxa</i>         | DDVSPDFYAW | VFPKYDHVAV | GTGTVVNRPG | IKGYQTAIRE | RAARKLEGGE  |

## 251

|     |                                    |            |            |            |            |            |
|-----|------------------------------------|------------|------------|------------|------------|------------|
| 009 | <i>Lotharella_amoeboformis_Euk</i> | IIKVEGSSHS | RAPSPPPCTR | RAALV----- | -----      | -----      |
| 101 | <i>Cyanidioschyzon_merolae_Euk</i> | VIKVEAHPIP | EHRPRRRVVG | RVALVGDAAG | YVTKCSGEGI | YFAAKSGRMC |
| 120 | <i>Emiliana_huxleyi_Localdb__</i>  | VMKVEAHPIP | EHRPRRRVVG | RVALVGDAAG | YVTKCSGEGI | YFAAKSGRMA |
| 006 | <i>Isochrysis_galbana</i>          | VMKVEAHPIP | EHRPRRRVVG | RVALVGDAAG | YVTKCSGEGI | YFAAKSGRMA |
| 001 | QUERY_ggr                          | IIKVEAHPIP | EHRPRRRVQG | RAALVGDAAG | YVTKCSGEGI | YFAAKSGRMA |
| 003 | <i>Guillardia_theta</i>            | IIKVEAHPIP | EHRPKRVLN  | RAALVGDAAG | YVTKCSGEGI | YFAAKSGRMA |
| 004 | <i>Ectocarpus_siliculosus</i>      | IIKIEAHPIP | ENYRPRRVVG | RMALVGDAAG | YVTKCSGEGI | YFAAKSGRMA |
| 005 | <i>Aureococcus_anophagefferens</i> | IIKVEAHPIP | EHRPRRRVKN | RAMLVGDAAG | YVTKCSGEGI | YFAAKSGRMA |
| 010 | <i>Thalassiosira_pseudonana_CC</i> | IIKVEAHPIP | EHRPNRVQG  | RMALVGDAAG | YVTKCSGEGI | YFAAKSGRMA |
| 011 | <i>Phaeodactylum_tricornutum_C</i> | IIKVEAHPIP | EHRPRRRVQG | RIALVGDAAG | YVTKCSGEGI | YFAAKSGRMA |
| 036 | <i>Brachypodium_distachyon_Euk</i> | IIRVEAHPIP | EHRPKRVSG  | RVTLVGDAAG | YVTKCSGEGI | YFAAKSGRMC |
| 031 | <i>Selaginella_moellendorffii_</i> | IIRVEAHPIP | EHRPRRRVRD | RVALVGDAAG | YVTKCSGEGI | YFAAKSGRMC |
| 021 | <i>Physcomitrella_patens_subsp</i> | IIRVEAHPIP | EHRPRRRVSS | RVALVGDAAG | YVTKCSGEGI | YFAAKSGRMC |
| 015 | <i>Ostreococcus_tauri_Eukaryot</i> | IIRVEAHPIP | EHRPNRVKG  | RVALVGDAAG | YVTKCSGEGI | YFAAKSGRMA |
| 028 | <i>Micromonas_pusilla_CCMP1545</i> | IIRVEAHPIP | EHRPRRRVQG | RVTLVGDAAG | YVTKCSGEGI | YFAAKSGRMA |
| 012 | <i>Volvox_carteri_f__nagariens</i> | IIRVEAHPIP | EHRPRRRCKG | RVALVGDAAG | YVTKCSGEGI | YFAAKSGRMC |
| 013 | <i>Chlamydomonas_reinhardtii_E</i> | IIRVEAHPIP | EHRPRRRCKG | RVALVGDAAG | YVTKCSGEGI | YFAAKSGRMA |
| 007 | <i>Pyropia_zezoensis</i>           | IIKIEAHPIP | EHRPRRCVG  | RVALIGDAAG | YVTKASGEGI | YFAAKSGRMA |
| 019 | <i>Synechococcus_elongatus_PCC</i> | IIKVEAHPIP | EHRPRRRVVG | RAALVGDAAG | YVTKSSGEGI | YFAAKSGRMC |
| 035 | <i>cyanobacterium_UCYN-A_Bacte</i> | VIKVEAHPIP | EHRPRRRVN  | RVALVGDAAG | TVTKSSGEGI | YFAAKSARMC |
| 024 | <i>Thermosynechococcus_elongat</i> | IIKVEAHPIP | EHRPRRRVVG | RVALVGDAAG | TVTKSSGEGI | YFAAKSARMC |
| 014 | <i>Cyanothece_sp__PCC_7425_Bac</i> | IIKVEAHPIP | EHRPRRRVVG | RVALVGDAAG | TVTKSSGEGI | YFAAKSARMC |
| 032 | <i>Acaryochloris_sp__CCMEE_541</i> | IIKVEAHPIP | EHRPRRRVVG | RVALVGDAAG | TVTKSSGEGI | YFAAKSARMC |

|     |                                    |                     |                     |                     |                     |                     |
|-----|------------------------------------|---------------------|---------------------|---------------------|---------------------|---------------------|
| 020 | <i>Microcoleus vaginatus_FGP-2</i> | I I K V E A H P I P | E H P R P R R V V G | R V A L V G D A A G | Y V T K S S G E G I | Y F A A K S G R M C |
| 030 | <i>Trichodesmium erythraeum_IM</i> | I I K V E A H P I P | E H P R P H R V R G | R V A L V G D A A G | T V T K S S G E G I | Y F A A K S A R M C |
| 025 | <i>Lyngbya_sp__PCC_8106_Bacter</i> | I I K V E A H P I P | E H P R P R R V V G | R V A L V G D A A G | T V T K S S G E G I | Y F A A K S A R M C |
| 018 | <i>Cylindrospermopsis racibors</i> | I I K V E A H P I P | E H P R P R R V V G | R I A L V G D A A G | Y V T K S S G E G I | Y F A A K S G R M C |
| 017 | <i>Fischerella_sp__JSC-11_Bact</i> | I I K V E A H P I P | E H P R P R R V V G | R V A L V G D A A G | Y V T K S S G E G I | Y F A A K S G R M C |
| 027 | <i>Nostoc azollae_0708_Bacteri</i> | I I K V E A H P I P | E H P R P R R V V G | R I A L V G D A A G | Y V T K S S G E G I | Y F A A K S G R M C |
| 023 | <i>Microcoleus chthonoplastes_</i> | I I K V E A H P I P | E H P R P R R V V G | R V A L V G D A A G | T V T K S S G E G I | Y F A A K S A R M C |
| 026 | <i>Cyanothece_sp__PCC_7822_Bac</i> | I I K V E A H P I P | E H P R P R R V V G | R V A L V G D A A G | T V T K S S G E G I | Y F A A K S A R M C |
| 008 | <i>Galdieria sulphuraria</i>       | I I K V E A H P I P | E H P R P R R V V G | R V A L V G D A A G | Y V T K C S G E G I | Y F A A K S G R M C |
| 002 | <i>Cyanophora paradoxa</i>         | L I K V E A H P I P | E H P R P R R V V D | R V A L V - D A A G | Y V T K C S G E G I | Y F A A K S G R M C |

## 301

|     |                                    |                     |                     |                     |                     |                     |
|-----|------------------------------------|---------------------|---------------------|---------------------|---------------------|---------------------|
| 009 | <i>Lotharella amoeboformis_Euk</i> | -----               | -----               | -----               | -----               | -----               |
| 101 | <i>Cyanidioschyzon merolae_Euk</i> | G E A I V R A S L N | G S R I P T E Q D L | R G Y L R P Y D R Q | Y G P T Y T V L D I | L Q K V F Y T N N A |
| 120 | <i>Emiliana huxleyi_Localdb__</i>  | A E E I V A L T A G | G T R L P T E M E I | K T Y L K K F D A A | Y G P T Y L V L D I | L Q K V F Y T N N G |
| 006 | <i>Isochrysis galbana</i>          | A Q E I V A L T A G | G S R L P T E Q E I | K T Y L K K F D Q K | Y G P T Y L V L D I | L Q K V F Y T N N G |
| 001 | QUERY_ggr                          | A Q A I V Q L M Q G | G T R L P T Q Q E I | E T Y I A D Y D K K | Y Q A T Y V V L D L | L Q K V F Y S S N A |
| 003 | <i>Guillardia theta</i>            | A E A I T K L T Q G | G T V L P T Q E E I | E T Y L R R Y D Q L | Y G P T Y A V L D V | L Q Q V F Y R S N P |
| 004 | <i>Ectocarpus siliculosus</i>      | A E A V V Q C I K Q | T G K L P T E A Q L | K T Y L K D Y D K L | Y K P T Y L V L D I | L Q K V F Y S N N A |
| 005 | <i>Aureococcus anophagefferens</i> | A E A V V K L M K G | G T V L P T E E G I | T E Y I K P Y D G L | Y G P T Y T V L D I | L Q K V F Y T N N A |
| 010 | <i>Thalassiosira pseudonana_CC</i> | A E A I V K L M D G | G K R L P T Q N E I | E T Y L A D Y D K L | Y G P T Y T V L D I | L Q K V F Y S N N G |
| 011 | <i>Phaeodactylum tricorutum_C</i>  | A E E I V K L M K N | G S V L P T Q A D I | E T Y L K K Y D N L | Y G P T Y T V L D L | L Q K V F Y V N N G |
| 036 | <i>Brachypodium distachyon_Euk</i> | A E A I V A G S A N | G T R L V E E G D L | R K Y L A E F D R L | Y W P T Y K V L D I | L Q K V F Y R S N A |
| 031 | <i>Selaginella moellendorffii_</i> | A E A I V E G S E K | G V R M I N E A D L | R S Y L Q K W D T K | Y W P T Y K V L D I | L Q K V F Y R S N P |
| 021 | <i>Physcomitrella patens_subsp</i> | A E A I V E G S A N | G T R M V D E S D L | R V Y L D K W D K K | Y W A T Y K V L D I | L Q K V F Y R S N P |
| 015 | <i>Ostreococcus tauri_Eukaryot</i> | A E A V V E Q S M N | G T K E I D E S D L | R V Y L D K W D R K | Y W A T Y K V L D I | L Q K V F Y R S N P |
| 028 | <i>Micromonas pusilla_CCMP1545</i> | A E A V V E R S E N | G T K E V D E S D L | R L Y L D K W D R K | Y W A T Y K V L D I | L Q K V F Y R S N P |
| 012 | <i>Volvox carteri_f_nagariens</i>  | A E A I V E A S A N | G T K M A G E D A I | R V Y L D K W D R K | Y W A T Y K V L D I | L Q K V F Y R S N P |
| 013 | <i>Chlamydomonas reinhardtii_E</i> | A E A I V E G S A N | G T K M C G E D A I | R V Y L D K W D R K | Y W T T Y K V L D I | L Q K V F Y R S N P |
| 007 | <i>Pyropia yezoensis</i>           | G E A L V A L S N K | G A R T P T E A D I | K S Y I K D F D R K | Y W A T Y K A L D I | L Q S V F Y K N D K |
| 019 | <i>Synechococcus elongatus_PCC</i> | A E T I V E T S N N | G A R I P T E A D L | K Q Y L R R W D K K | Y G T T Y K V L D L | L Q T V F Y R S D A |
| 035 | <i>cyanobacterium_UCYN-A_Bacte</i> | A E I I V E T S N S | G R T I P T E D D L | K L Y L K R W D K Q | Y G T T Y L V L D I | L Q H I F Y R S D A |
| 024 | <i>Thermosynechococcus elongat</i> | A E T I V E T S N G | G R R I P T E A D L | K L Y L K R W D K A | Y G M T Y L V L D L | L Q R V F Y R S D A |
| 014 | <i>Cyanothece_sp__PCC_7425_Bac</i> | A E T I V E F S Q G | G Q R V P T E Q E L | K I Y L K R W D R K | Y G I T Y K V L D L | L Q T V F Y R S D A |
| 032 | <i>Acaryochloris_sp__CCMEE_541</i> | A E A I V E F S N N | G Q R I P T E D E L | K I Y L K R W D K A | Y G M T Y K V L D I | L Q R V F Y R S D A |
| 020 | <i>Microcoleus vaginatus_FGP-2</i> | A E T I V E I S N K | G A R I P T E E E I | K I Y L K R W D K A | Y G I T Y K V L D I | L Q R V F Y R S D A |
| 030 | <i>Trichodesmium erythraeum_IM</i> | A E T I V E A S N N | G A I I P T E A D L | K L Y L K R W D K K | Y G M T Y K V L D I | L Q R V F Y R S D A |
| 025 | <i>Lyngbya_sp__PCC_8106_Bacter</i> | A E T I V E M S N N | G A K I P T E D D L | K I Y L K R W D K Q | Y G M T Y L V L D I | L Q R V F Y R T D A |
| 018 | <i>Cylindrospermopsis racibors</i> | A E T I V E V S N S | G A R I P N E R E L | K L Y I K R W D K K | Y G L T Y K V L D L | L Q T V F Y R S D A |
| 017 | <i>Fischerella_sp__JSC-11_Bact</i> | A E T I V E V S N G | G I R I P T E A D L | K V Y L K R W D K K | Y G L T Y K V L D L | L Q T V F Y R S D A |

|     |                             |            |            |            |            |            |
|-----|-----------------------------|------------|------------|------------|------------|------------|
| 027 | Nostoc_azollae_0708_Bacteri | AETIVEVSNN | GVRIPTENDL | KIYLKRWDKK | YGLTYKVLDI | LQTVFYRSDA |
| 023 | Microcoleus_chthonoplastes_ | AETIVETSNG | GTRIPTEADL | KLYLKRWDKK | YGITYKVLDI | LQTVFYRSDA |
| 026 | Cyanothece_sp_PCC_7822_Bac  | AETIVETSNG | GQRIPTEDDL | KLYLKRWDKK | YGMTYLVLDI | LQRVFYRSDA |
| 008 | Galdieria_sulphuraria       | AEAIAEISQQ | GERIPSESEL | KTYLKRWDQK | YWSTYKVLDV | LQAVFYRNNI |
| 002 | Cyanophora_paradoxa         | AEAIVETSKN | GERVPTEAEL | KTYLRRWDQK | YWATYKVLDI | LQAVFYRSNP |

351

|     |                             |            |            |            |            |            |
|-----|-----------------------------|------------|------------|------------|------------|------------|
| 009 | Lotharella_amoeboformis_Euk | -----      | -----      | -----      | -----      | -----      |
| 101 | Cyanidioschyzon_merolae_Euk | AREAFCELCG | DDYVQQVTFD | SYLYKKVTRT | SPVEDVKLLF | RTIGSLMRGH |
| 120 | Emiliania_huxleyi_Localdb__ | AREAFVDMCA | SDYVQKVTFD | SYLYKKVQGN | DPINDIKLLF | NTIGSVIKGN |
| 006 | Isochrysis_galbana          | AREAFVDMCA | SDYVQKVTFD | SYLYKKVQGN | NPLDDVKLLF | NTIGSVIKGN |
| 001 | QUERY_ggr                   | AREAFVEMCD | SDYVQKVTFD | SYLYKTVQGG | NPVDDIKLLF | STVGSIFRAQ |
| 003 | Guillardia_theta            | AREAFVEMCE | SEYVQKVTFD | SYLYKKVTSG | GPVEDLKLLF | NTVRSLVKQR |
| 004 | Ectocarpus_siliculosus      | AREAFVELCE | SEYVQKVTFD | SYLYKKVQGN | NPVEDLKLLF | GTFGSLMRGQ |
| 005 | Aureococcus_anophagefferens | AREAFVDMCQ | SEYVQDVTFQ | SYLYKRLVTP | NPVEDIKLLF | GTVGSLLRGR |
| 010 | Thalassiosira_pseudonana_CC | AREAFVELCN | SKYVQQVTFD | SYLYKKVQGN | NPLDDIKLLG | ETIGCLIKGY |
| 011 | Phaeodactylum_tricornutum_C | AREAFVELCN | SKYVQQVTFD | SYLYKRVQGN | NPLDDLKLLG | ETIGCLIKGY |
| 036 | Brachypodium_distachyon_Euk | AREAFVEMCA | DDYVQRMFTD | SYLYKRVPVG | NPLEDIKLA  | NTIGSLVRAT |
| 031 | Selaginella_moellendorffii_ | AREAFVELCA | DEYVQKMTFD | SYLYKTVVPG | NPLDDIKLAV | NTIGSLIRAN |
| 021 | Physcomitrella_patens_subsp | AREAFVEMCA | DDYVQKMTFD | SYLYKVVVPG | NPLDDIKLAV | NTIGSLIRAN |
| 015 | Ostreococcus_tauri_Eukaryot | AREAFVEMCA | DEYVQKMTFD | SYLYKTVVPG | NPLDDAKLLA | NTVASLVRSN |
| 028 | Micromonas_pusilla_CCMP1545 | AREAFVEMCA | DEYVQKMTFD | SYLYKTVVPG | NPLDDMKLLG | NTVASIVRAN |
| 012 | Volvox_carteri_f_nagariens  | AREAFVELCE | DSYVQKMTFD | SYLYKTVVPG | NPLDDVKLLV | RTVSSLLRSN |
| 013 | Chlamydomonas_reinhardtii_E | AREAFVELCE | DSYVQKMTFD | SYLYKTVVPG | NPLDDVKLLV | RTVSSILRSN |
| 007 | Pyropia_zezoensis           | TKESFVELCD | DEYVQRVTFD | SYLYKTVTTV | NPVEDMKLLF | RTVGSVLK-- |
| 019 | Synechococcus_elongatus_PCC | TREAFVEMCD | DKDVQRLTFD | SYLYKTVVPA | NPLVQLKITA | KTIGSLLRGN |
| 035 | cyanobacterium_UCYN-A_Bacte | SREAFVEMCA | DKNAQRMTFD | SYLYKTVVPM | NPLVQMKLTA | KTIGSLLRGH |
| 024 | Thermosynechococcus_elongat | TREAFVEMCS | DLDVQKLTFD | SYLYKTVVPA | NPLVQLKITA | KTIGSLMRGN |
| 014 | Cyanothece_sp_PCC_7425_Bac  | TREAFVEMCA | DLDVQKLTFD | SYLYKTVVPA | NPLVQLKITA | KTIGSLLRGH |
| 032 | Acaryochloris_sp_CCMEE_541  | TREAFVEMCA | DEDVQQMTFD | SYLYKTVVPM | NPLKQIKITA | KTIGSLIRGN |
| 020 | Microcoleus_vaginatus_FGP-2 | TREAFVEMCA | DRDVQKLTFD | SYLYKTVVPA | NPFVQMKITA | KTIGSLLRGN |
| 030 | Trichodesmium_erythraeum_IM | TREAFVEMCA | DRDVQKLTFD | SYLYKTVVPA | NPLIQMKITA | KTIGSMLRGH |
| 025 | Lyngbya_sp_PCC_8106_Bacter  | TREAFVEMCS | DLDVQKMTFD | SYLYKTVVPA | NPLVQMKITA | KTIGSLLRGH |
| 018 | Cylindrospermopsis_racibors | TREAFVEMCD | DMDVQKLTFD | SYLYKTVVPA | NPITQLKITA | KTIGSLLRGN |
| 017 | Fischerella_sp_JSC-11_Bact  | TREAFVEMCA | DLDVQRLTFD | SYLYKTVVPA | NPITQLKITA | KTIGSLIRGN |
| 027 | Nostoc_azollae_0708_Bacteri | TREAFVEMCD | DMDVQRLTFD | SYLYKTVVPA | NPITQLKITA | KTIASLLRGN |
| 023 | Microcoleus_chthonoplastes_ | TREAFVEMCS | DLDVQRLTFD | SYLYKTVVPA | NPLVQLKITA | KTIGSLLRGN |
| 026 | Cyanothece_sp_PCC_7822_Bac  | AREAFVEMCS | DKDVQRLTFD | SYLYKTVVPA | NPLIQMKITA | KTIGSLLRGY |
| 008 | Galdieria_sulphuraria       | AREAFVELCE | DEYVQQMTFD | SYLYKTVAKG | NPLQDVRLLF | HTLGAFARAP |
| 002 | Cyanophora_paradoxa         | AREAFVELCA | DEYVQKMTFD | SYLYKTVVPG | NPISDFKLLV | NTVGSLLRGN |

401

|                                 |      |
|---------------------------------|------|
| 009Lotharella_amoeboformis_Euk  | ---- |
| 101Cyanidioschyzon_merolae_Euk  | ALAP |
| 120Emiliana_huxleyi_Localdb__   | ATAK |
| 006Isochrysis_galbana           | AIAS |
| 001QUERY_ggr                    | ATTP |
| 003Guillardia_theta             | SDIP |
| 004Ectocarpus_siliculosus       | ALAP |
| 005Aureococcus_anophagefferens  | AIAT |
| 010Thalassiosira_pseudonana_CC  | SIK  |
| 011Phaeodactylum_tricornutum_C  | ADAK |
| 036Brachypodium_distachyon_Euk  | ALRR |
| 031Selaginella_moellendorffii_  | ALRK |
| 021Physcomitrella_patens_subsp  | ALRK |
| 015Ostreococcus_tauri_Eukaryot  | ALRI |
| 028Micromonas_pusilla_CCMP1545  | ALRA |
| 012Volvox_carteri_f_nagariens   | ALRS |
| 013Chlamydomonas_reinhardtii_E  | ALRS |
| 007Pyropia_yezoensis            | ---- |
| 019Synechococcus_elongatus_PCC  | ALAP |
| 035cyanobacterium_UCYN-A_Bacte  | ALAP |
| 024Thermosynechococcus_elongat  | ALAP |
| 014Cyanosphaera_sp_PCC_7425_Bac | ALAP |
| 032Acaryochloris_sp_CCMEE_541   | ALAP |
| 020Microcoleus_vaginatus_FGP-2  | ALAP |
| 030Trichodesmium_erythraeum_IM  | ALAP |
| 025Lyngbya_sp_PCC_8106_Bacter   | ALAP |
| 018Cylindrospermopsis_racibors  | ALAP |
| 017Fischerella_sp_JSC-11_Bact   | ALAP |
| 027Nostoc_azollae_0708_Bacteri  | ALAP |
| 023Microcoleus_chthonoplastes_  | ALAP |
| 026Cyanosphaera_sp_PCC_7822_Bac | ALAP |
| 008Galdieria_sulphuraria        | ALAP |
| 002Cyanophora_paradoxa          | ALAP |

Alignment: RNABP

```

143Phytophthora_capsici_Locald -----GVDV FIG-----
59Cyanidioschyzon_merolae_Euka CRAIIVGGHA SIGLYLARQL LSLDLEVYLL GQEEAEEAIS FGDPSNQTRS
57Calliarthron_tuberculosis_Eu ADVLVLGGHA FLGAHLSSEL LVGGNNKVRV DDKSAKHSFS VEAPSS---L
082Aureococcus_anophagefferens GHAVIVGGHG EIGYHLAKAL AAKDLDVTIV ASAS--ATVA WCDAAA EKCA
127Emiliana_huxleyi_Localdb__ ADVLVIGGHG EIGFHLAQHL VSRGDAVTIL GDGPSDVKVI WGGEAALALE
144Pyropia_yezoensis_Localdb__ QRCLVIGGTR FSGLYLVQEL LSRGHEVVMY GNTNARTSVI VGDGEERDLA
086Cyanophora_paradoxa_Localdb RKVLVIGGTR FSGVYLVKAL QEAGHEVTVF GKRASKIKTI VGDPEKQLA
24Synechococcus_elongatus_PCC_ MRILVIGGSR FIGVALVRQL LAAGHAVTVF GSRLAGVEQL VGDPAQAQLQ
26Synechococcus_sp_PCC_7335_B MRVLVIGGTR FIGVYLTRQL VKQGHAVTLL GNHVDEVETI VCDPEAKQLS
18Leptolyngbya_sp_PCC_6406_Ba MRILVMGGTR FIGVYLTRLL VEQGHEVLL GNKVSQVAQI HCDTTAKTLV
22Geitlerinema_sp_PCC_7407_Ba MRILIMGGTR FIGVYLTRIL VEQGHEVLF GNKVAGVQVI QGDAGQKELA
02Thalassiosira_pseudonana_CCM SSALIVGGHG ELGFQLAKNL SSNSKITSIT QDSPNVVKAD FADTASQSLQ
06Phaeodactylum_tricornutum_CC SAALIVGGHG ELGFQLAKVL SDNDKITSVT QDDPDVVKAS LGDTATQDLK
09Volvox_carteri_f_nagariensi ANVLIAGGHA FIGLYLAKEL LKKGHKVTIM GDEARDATIA WGDPTKPSYP
10Chlamydomonas_reinhardtii_Eu SNVLIAGGHA FIGLYLAKEL LKKGHKVTIM GDSERQLNVV WADPAKPSYP
05Micromonas_sp_RCC299_Eukary QKVLIVGGHA NIGFWLAKTL AAQGHSVTLN GSKTSAVQTV WADPGEATAA
080streococcus_tauri_Eukaryota KKVLIVGGHA NIGFWLAKTL AGAGHEVTMN GAERSMVTIT WADPADATHA
04Oryza_sativa_Japonica_Group_ KSVLIVGGHA VIGFYLAIDL LAAGHAVTVL GDETSAAITV WGD PADGAVG
03Physcomitrella_patens_subsp_ KKVLIVGGHA VIGFWTAKDL VDAGHSVTLN GEEREIVETV WGEPSD GAVG
07Selaginella_moellendorffii_E RKVLIVGGHA VIGFWLAKDL VAAGHEVTMN GEERDLVSTV WGD PKD GAVG
090Ectocarpus_siliculosus_Loca GKALIAGGHG ELGYHLALKL IEKDISVTLL QDGESKATIV WGD FSEGKIE
01QUERY_Bigel_86677 -----HTIA RLRVHLASQL ATDGHAVTLL G DPMGKVTIK YGDACSPGLE
99Lth_N10_86677 -----

```

51

```

143Phytophthora_capsici_Locald -----EAAV VAHIE-----SGLL RTENELP---
59Cyanidioschyzon_merolae_Euka AGPIAAFIDN RSQTLDEALL LHKFAMLAER YLYVSSCGIY EPGD-YAFIE
57Calliarthron_tuberculosis_Eu SESYDAVYDN YSKGAGDIKL ALQQAA-GAT VHYVSSAGAY APLA-YGAPS
082Aureococcus_anophagefferens VDGLTHVYDN FAKSPADAAP MMAAASDAF YAFVSSAGMY TAKGL--KEE
127Emiliana_huxleyi_Localdb__ GASFSAVVDN WSKSPEAIAP YATAAKWVSN YAYVSSAGMY TPKDYGAVG
144Pyropia_yezoensis_Localdb__ GLKFDAVFDN NGRSLED SAP LVDAAMVKH YVYMSSAGVY LKSDVMPHVE
086Cyanophora_paradoxa_Localdb KEEFDVIYDN NGRELTDTKP LADMFKRLEH FVYMSSAGTY LMNDSL PYRE
24Synechococcus_elongatus_PCC_ GRSFDVVDN TGREAAETQA LVASLDQFQQ LIYVSSAGVY AASDQLPLRE
26Synechococcus_sp_PCC_7335_B DQSFDAIFDN NGRELAHTKP LADLFKCLKH LVYVSSAGVY AKSDQMPHVE
18Leptolyngbya_sp_PCC_6406_Ba GQNFDAIFDN NGREQSDTQP LVELFGVQVH LIYVSSAGVY LKSDQMPHVE
22Geitlerinema_sp_PCC_7407_Ba GESFDVVDN NGRELSDTQP LVEIFQRLQH FVYVSSAGVY QKSDQMPHVE
02Thalassiosira_pseudonana_CCM --SYDYVWDN ASKKASAGKA VIDCVKWSKL LTYVSSAGIY KPKDEFMPPE
06Phaeodactylum_tricornutum_CC DAAFDYVWDN ASKSPKAGQA ICDLAKWVKL FTYVSSAGMY QPTADFPMPPE

```

|                                |            |            |            |            |            |
|--------------------------------|------------|------------|------------|------------|------------|
| 09Volvox_carteri_f_nagariensi  | RGSFDVVYDN | NGKDLSSCQP | MIDHFKKVDH | YVSVSSAGAY | KADSIEPHVE |
| 10Chlamydomonas_reinhardtii_Eu | RGTFDVVYDN | NGKDLASCQP | LIDHFKKVDH | YVSVSSAGAY | KADPIEPHVE |
| 05Micromonas_sp_RCC299_Eukary  | GAQFDVVVDN | NGKDLDSVGP | VAFAKCAKQ  | FLFVSSAGMY | KPTPTPPHLE |
| 08Ostreococcus_tauri_Eukaryota | GAKFDVVVDN | NGKDMDTVGP | VADFAVAASQ | FLFVSSAGIY | KPTPCPPHVE |
| 04Oryza_sativa_Japonica_Group  | GASFDVVLDN | NGKDLDAVKP | VVDWAKAVAQ | FLFVSSAGIY | TPSDEPPHVE |
| 03Physcomitrella_patens_subsp  | SASFDVVLDN | NGKTLDVVQP | VADWAKNAKQ | FLFISSAGIY | KSTFEQPHVE |
| 07Selaginella_moellendorffii_E | GKSFHAVLDN | NGKDLDAVKP | VVDWAKQVEQ | FLFISSAGIY | KTSDEPPHVE |
| 090Ectocarpus_siliculosus_Loca | GESFDYVFDN | YAKVDVTCKD | LADCSKWKVN | YAYVSSGGMY | KDSDEVPFTE |
| 01QUERY_Bigel_86677            | LGEFDAVFDN | ISKGKDSCKV | AADKAKWVKH | YAYVSSAGMY | KPGVIFPMSE |
| 99Lth_N10_86677                | -----      | -----      | -----      | -----      | -----      |

101

|                                |            |                |            |            |             |
|--------------------------------|------------|----------------|------------|------------|-------------|
| 143Phytophthora_capsici_Locald | -----      | -----FMQE----- | -----      | -----      | -----       |
| 59Cyanidioschyzon_merolae_Euka | TDQVRQSAGQ | AQVESFLRDS     | VIPAAFRPMY | IIGKAAKLDY | TNFFLDRITR  |
| 57Calliarthron_tuberculosum_Eu | RVGDSAAGGT | VDAEEALRSA     | GARASFRPIY | MYGPSAKRAY | LDFFFDRVVR  |
| 082Aureococcus_anophagefferens | KKVKDPPTGQ | REVELALEAE     | LAGCAFRPQY | IYGPTNKRDY | LDWFLNRAAR  |
| 127Emiliana_huxleyi_Localdb__  | EECAVKSSGQ | RQAEEKIAEM     | GLPSYFRPQY | IYGPAQGKSY | LAFFFDRITR  |
| 144Pyropia_zezoensis_Localdb__ | GDATDPKSRH | LQTEAYMVDA     | GIPTSIRPTY | IYGALNYNPL | EQWFFERLAA  |
| 086Cyanophora_paradoxa_Localdb | SDPTDPKSRH | KETEAFKES      | GQPTSIRPVY | IYGPQNYN-V | EQWFFHRIHA  |
| 24Synechococcus_elongatus_PCC_ | SDPVPDQSRH | RETENWLQQQ     | GLPTAFRPVY | IYGPQNYNPL | EQWFFDRILR  |
| 26Synechococcus_sp_PCC_7335_B  | GDRVDPNSRH | KHTEDYLREQ     | GIPTAIRPVY | IYGPQNYNPL | EKWFFDRLVR  |
| 18Leptolyngbya_sp_PCC_6406_Ba  | GDAVDPNSRH | KETEAYLAAQ     | GVPTAIRPVY | IYGPQNYNDL | EAWFFDRLVR  |
| 22Geitlerinema_sp_PCC_7407_Ba  | GDAVDPKSRH | RETEDYLATQ     | GVPTSIRPVY | IYGPQNYNPL | ESWFFDRIVR  |
| 02Thalassiosira_pseudonana_CCM | TTPVKDTAGQ | VEYEKYAVEK     | GLPVSFRPQY | IYGESNKWDY | IDWYFDRLVR  |
| 06Phaeodactylum_tricornutum_CC | TTPIKESAGQ | NQFDQYAIQQ     | GLPVTFRPQY | IYGPANKHDY | IDWYFDRLVR  |
| 09Volvox_carteri_f_nagariensi  | GDARKSTAGH | VEVEAYLEKA     | RVPTVFQPLY | IYGPNTAKDC | EQWFFVDRIIR |
| 10Chlamydomonas_reinhardtii_Eu | GDARKSTAGH | VEVEAYLEKA     | RLPTVFQPLY | IYGPNTAKDC | EQWFFVDRIIR |
| 05Micromonas_sp_RCC299_Eukary  | GDAVKESAGH | AQVEAKLATM     | PFSASFRPQY | FTGYGNNKDC | EEYFFDRLVR  |
| 08Ostreococcus_tauri_Eukaryota | GDAVKETAGH | AVVEAHLKTL     | PLKSSFRPQY | LTGYGSNKDC | EEWFFDRLVR  |
| 04Oryza_sativa_Japonica_Group  | GDAVKESAGH | VGVEKYIAEQ     | -FGASFRPQY | MIGSGNNKDC | EEWFFDRIVR  |
| 03Physcomitrella_patens_subsp  | GDAVKEDAGH | KQVENYLAEL     | GLEASFRPQY | MTGDGNNKDC | EEWFFDRIAR  |
| 07Selaginella_moellendorffii_E | GDPVKVDAGH | VGVEDYISKS     | AFKSSFRPQY | MTGSGNNKDC | EEWFFDRIVR  |
| 090Ectocarpus_siliculosus_Loca | SSDVKES-GQ | RQVEKYVADL     | GLPTSFRPQY | IYGPTNKRDY | LDWFFDRVVH  |
| 01QUERY_Bigel_86677            | SLPVKESAGQ | KEVEDYLNLS     | GLPSSFRPQY | IYGPTNKRDY | LDYFFDRIVR  |
| 99Lth_N10_86677                | -----      | -----          | -----      | -----      | -----       |

151

|                                |            |            |            |            |            |
|--------------------------------|------------|------------|------------|------------|------------|
| 143Phytophthora_capsici_Locald | ---IP----- | ---SELTHVN | HEA----AVQ | DGEDREAE-- | --VIVRASQI |
| 59Cyanidioschyzon_merolae_Euka | KRPIPLPGKG | NAFVSLTHAE | DVASMLAAVL | ARPDESQGVF | NAVSPRYVTL |
| 57Calliarthron_tuberculosum_Eu | KRPVYIPGTG | AELTSITDVR | DVAAMMAAAL | GKPLDA--VF | NAVSPRAITF |



|                                |             |             |              |             |             |
|--------------------------------|-------------|-------------|--------------|-------------|-------------|
| 082Aureococcus_anophagefferens | DIPMAVPADA  | QQPVSLTHCE  | DVAALMASV    | GKEGAADQIF  | NCGTNKMCSY  |
| 127Emiliana_huxleyi_Localdb__  | GRPVVPNGG   | DQLVTMTHAA  | DNAAMIAAAV   | GNEAAVGEAF  | NCATPSLVTY  |
| 144Pyropia_yezoensis_Localdb__ | GRPVCVPGHG  | AHLTGLGHVR  | DLATAMAATI   | ETDASVGQVY  | NIQDRHAVTF  |
| 086Cyanophora_paradoxa_Localdb | GRPICVPGHG  | QHLTGLGHVE  | DLAVAMANVI   | GNKKAVGQIY  | NIAGDRCVTF  |
| 24Synechococcus_elongatus_PCC_ | DRPLPIP GTG | LHLTQLGHVE  | DLATAMVA AV  | KNPRAIGQIY  | NLSGDRYVSF  |
| 26Synechococcus_sp__PCC_7335_B | DRPIPIPGSG  | MALTHLGH CQ | DLAAAMVSVL   | GNDNAVGEIY  | NISGDKAVTF  |
| 18Leptolyngbya_sp__PCC_6406_Ba | DRPIPIPGDG  | MALTQLGHVQ  | DLAAAMA AVL  | SNPRAVGQTY  | NISGDRAVTF  |
| 22Geitlerinema_sp__PCC_7407_Ba | DRPVPIPGNG  | AHLTQLGHVQ  | DLAKAMA AVL  | GNSQAIGQIY  | NISGDRAVTF  |
| 02Thalassiosira_pseudonana_CCM | GEPLPIP GDG | SQKVSLT NSE | DVASLLASVL   | NDESAVGQFF  | NCGTDQLV TY |
| 06Phaeodactylum_tricornutum_CC | ELPLPIP GDG | TQKLSLT NAE | DVASLLA AP L | NDEAAIAQV F | NCGTDQLV SY |
| 09Volvox_carteri_f__nagariensi | DRPVPIPSPG  | IQLTSLTHVE  | DVAAMLALVP   | GNREAIGQMY  | NVCSDRCISF  |
| 10Chlamydomonas_reinhardtii_Eu | DRPVLLPAPG  | VQLTSLTHVE  | DVASMLAAVP   | GNRAAIGQHY  | NVCSDRCITF  |
| 05Micromonas_sp__RCC299_Eukary | GRPVLVPGSG  | DQLSVVAHAE  | DVATMMAAAV   | GNPAANGVIF  | NAVTKAVTL   |
| 08Ostreococcus_tauri_Eukaryota | GRPVLVPGSG  | DQLSSVTHAE  | DLATMIAAAI   | GNDGAAGEIF  | NCVMPKAVTL  |
| 04Oryza_sativa_Japonica_Group_ | GRPVPIPGSG  | MQVTNISHVR  | DLASMLVALAV  | ESPGAAGRIF  | NCVSDRAVTF  |
| 03Physcomitrella_patens_subsp_ | GRPVPIPSPG  | IQVTNISHVR  | DLSSMLTLAV   | GKPEANGSIF  | NCVSDRGTF   |
| 07Selaginella_moellendorffii_E | DKPVPIPSPG  | IQVTNIAHVS  | DLSSMITLAI   | GKPSANATIF  | NAVSDRAVTF  |
| 090Ectocarpus_siliculosus_Loca | GLEIPLPLHG  | DQLVALTHAE  | DVASMLASV    | -GNERVKQVF  | NCASDRYITY  |
| 01QUERY_Bigel_86677            | GRPVPVAGNG  | QQLVTLTHAA  | DVASMLGSVL   | DAGEKHMKV F | NCATDQLITV  |
| 99Lth_N10_86677                | -----       | -----       | -----        | -----       | -----       |

201

|                                |            |             |             |             |             |
|--------------------------------|------------|-------------|-------------|-------------|-------------|
| 143Phytophthora_capsici_Locald | DTSVQLSQGT | MQD-----    | -----       | -----LFGSP  | TPSEVEL---  |
| 59Cyanidioschyzon_merolae_Euka | KGLAEMCHRV | VHGDSKPIYY  | DPVKLATGLP  | FRVSYFIADP  | GKAMRL LAWQ |
| 57Calliarthron_tuberculosum_Eu | DGVAQIVASV | VGHE-AIVHY  | DPADNKKVFP  | FRIRHFFADP  | KEAMAELGWE  |
| 082Aureococcus_anophagefferens | DDVCIAAAKA | LGKSEALVAL  | PPDTK-SSFP  | FRPNAFAVRV  | RKAMDVLEWP  |
| 127Emiliana_huxleyi_Localdb__  | DDLVRLCAGA | AGKEE--IHY  | DPAGFKYKFP  | FRDTPFYVSA  | DKASRLLGFS  |
| 144Pyropia_yezoensis_Localdb__ | DGVARTAATA | MGM DASVLHY | NPKDFNKAFP  | FRPQHFF TSP | NKALRELDWS  |
| 086Cyanophora_paradoxa_Localdb | DGLVKACAEA | AGKPPEI---  | -----AFP    | FRQQHFFASI  | QKAEDLN-S   |
| 24Synechococcus_elongatus_PCC_ | DGLARACAIA | AGRDQALLHY  | DPKQLRKAFP  | MRAQHFITAI  | DQARQDLEWV  |
| 26Synechococcus_sp__PCC_7335_B | DGLARACAIA | MEKDDAVIHY  | NPKDFK KAFP | MRVQHFFTDI  | SKAKAELDWQ  |
| 18Leptolyngbya_sp__PCC_6406_Ba | DGLARACAIA | AGKDQALLHY  | DPKQFRKAFP  | MRVQHFFTAI  | DRAKADLGWQ  |
| 22Geitlerinema_sp__PCC_7407_Ba | DGLARACAAA | AGKDG TLLHY | DPKAFRKAFP  | MRVQHFFTSI  | DKAKHELGWQ  |
| 02Thalassiosira_pseudonana_CCM | DEVALMCAEV | AGVMAK-IHY  | D-DSLKAKFP  | FRLTDFYVSP  | DMAKAKLGWE  |
| 06Phaeodactylum_tricornutum_CC | DEVAYLCAEA | AGIDDKVIHY  | DADMFKATFP  | FRMTDFYVAP  | DTAKEKLGWS  |
| 09Volvox_carteri_f__nagariensi | VGICKSVAKA | LGKEANIVLY  | SPEKVKEGFP  | FRTVHFFASS  | DKAKRELGWK  |
| 10Chlamydomonas_reinhardtii_Eu | TGIAKAIGKA | LGKDPEI ILY | SPEKVKEGFP  | FRTVHFFASA  | DKAKRELGWK  |
| 05Micromonas_sp__RCC299_Eukary | NGMVQLCAAA | AGVEPKIVNY  | DPKCLKKAFP  | FRPIHFYSYP  | ANALKLLDWQ  |
| 08Ostreococcus_tauri_Eukaryota | NGMVELCAAA | AGVEAKIINY  | DPKDVKKAFP  | FRPIHFYSSS  | AKAQKVLGWS  |
| 04Oryza_sativa_Japonica_Group_ | NGLVKMCAAA | AGAQP EILHY | DPAAVK KAFP | FRNMHFYAEP  | RAAKEVLGWR  |

|                                |            |            |            |            |            |
|--------------------------------|------------|------------|------------|------------|------------|
| 03Physcomitrella_patens_subsp_ | DGLVKMCAKA | AGKEAKIVHY | DPKAIKKAFP | FRNMHFYAEP | RAAKTKLGWE |
| 07Selaginella_moellendorffii_E | DGLVRLCARA | AAKEAKIVHY | DAKALKKAFP | FRNMHFYAEP | RAAKEKLGWT |
| 090Ectocarpus_siliculosus_Loca | NGLFREVGKV | AKPASKMAYY | EPRDYKGWFP | FRNNHFVVNS | EKAKRLLGWS |
| 01QUERY_Bigel_86677            | DDLIVHCAKI | AGVPPRIVHY | DPKKVKKAFP | FRDSNFFVAP | DRAKAELGWS |
| 99Lth_N10_86677                | -----      | -----QIVHY | DPKKVKKAFP | FRDSHFFVAP | NKAKEDFGYK |

251

|                                |            |            |             |          |  |
|--------------------------------|------------|------------|-------------|----------|--|
| 143Phytophthora_capsici_Locald | ----SQGAVR | AFQDDAQD-G | IPERDV---I  | EQHLSGA  |  |
| 59Cyanidioschyzon_merolae_Euka | PRHDLQNDLE | MY-EEYLELG | LHERRVDLTN  | DDRIARS  |  |
| 57Calliarthron_tuberculosum_Eu | PKYGDLGAMG | SFYEEYKSLG | LHEKELKFDL  | EDAIARA  |  |
| 082Aureococcus_anophagefferens | ATHDVLADLG | FYTEDFLALG | LDKGDLDTSK  | DENMVQD  |  |
| 127Emiliana_huxleyi_Localdb__  | PAHSIADDIW | YYSEQYVAKG | GLDKELDFAE  | DDVVLGR  |  |
| 144Pyropia_yezoensis_Localdb__ | VQYELASGWD | TYENDFVPKA | QGKLNKNDWVT | DDMILGR  |  |
| 086Cyanophora_paradoxa_Localdb | PKYDLVAGLD | SY-NDYVHRT | V---ALDFET  | DDIILGK  |  |
| 24Synechococcus_elongatus_PCC_ | PRFSLIDGLN | SLQNDYLARG | LDQQAVDFSL  | DEEILAA  |  |
| 26Synechococcus_sp_PCC_7335_B  | PQFSLIDGLD | SYENDYLANN | LHKAEIDFSL  | DDQILS-  |  |
| 18Leptolyngbya_sp_PCC_6406_Ba  | PQFNLVNGLD | AFEKDYLVS  | RHQQTIDFDL  | DDQILAA  |  |
| 22Geitlerinema_sp_PCC_7407_Ba  | PEFDLVGGLD | SFQQDYLATH | QDQREVDVFS  | DEEIVAA  |  |
| 02Thalassiosira_pseudonana_CCM | AKHSLKEDLT | WYFDSYKARG | GPAKEMTFVE  | DKEVLV-  |  |
| 06Phaeodactylum_tricornutum_CC | PLHSLKDDLS | FYYESYVARG | GPTKKMSLIK  | DWEITVG  |  |
| 09Volvox_carteri_f_nagariensi  | PKHDFQKDVA | ALVADYKAQG | RDKKDVFDFSI | DDKILEA  |  |
| 10Chlamydomonas_reinhardtii_Eu | PKHDFQKDVQ | GLVNDYKANG | RDKKEVDVFSV | DDKILAA  |  |
| 05Micromonas_sp_RCC299_Eukary  | PKHDLAADLK | ERFEFYKASG | RANKDMSFEL  | DDKILAS  |  |
| 080streococcus_tauri_Eukaryota | PKHDLGAELK | ERFAYYKSTG | RDAKEMAFEV  | DDKILAA  |  |
| 04Oryza_sativa_Japonica_Group_ | SSTNLPEDLK | ERFAEYASSG | RGQKEMSFDL  | DDKI IAA |  |
| 03Physcomitrella_patens_subsp_ | SKTNLAEDLK | ARWEDYVKIG | RDKKDIKFEL  | DDKILEV  |  |
| 07Selaginella_moellendorffii_E | SSTNLSEALK | ERYEEYIKIG | RDKKDIKFEI  | DDTILSK  |  |
| 090Ectocarpus_siliculosus_Loca | PKHTITDDLA | EYFEGYKAAG | KVEAEPNFK   | DKQYQDM  |  |
| 01QUERY_Bigel_86677            | CQHDLEKELK | AYFEGYRALG | KTEKMSFPPI  | DDTILGQ  |  |
| 99Lth_N10_86677                | CEHDLVKELK | AYYEGYKAIG | KDQKEMSFPPI | DDQILNQ  |  |

## Alignment: RPS22

```

44Calliarthron_tuberculosis_Eu    TAIRITGNNV  AMTDSLRTYV  REKLRKVIRK  HASLLTKIDV  HLAVEHNPAI
46Porphyridium_cruentum_Eukary    ARISISGTNI  VSYRTSRDRV  RSKVGRSIGK  YDQMVIRADV  HLLVAKNPAI
65Emiliana_huxleyi_Localdb_L     TKLDVTSSKL  PLTPALRDAT  DEKLGKQLDR  YDKYLSVSV  NLKVHDREHV
48Aureococcus_anophagefferens_   SMVLSDGNNL  KMTDSMRDYV  EDKIGTVISK  FAGVAQRCDT  HLSVMRNPV
01QUERY_Bigel_rps22_51185        --MVMTGNNI  ELTESIAAYT  NDKLGQMLKK  YKDFVKSTEI  HFTINKNPAV
42Lotharella_amoeboformis_Euka    -----    -----    -----LKK  YKEFVKSCIE  HFTINKNPSV
38Brachypodium_distachyon_Euka    ARLIMQGRNV  KLTEKLKEHI  EEKVGRAVSN  HSHLVREVDV  RLSAGKGPKA
37Selaginella_moellendorffii_E   IRLVIQGKHL  ELTEALKAYV  EDKVGKAVHN  HAYLVMEVDV  RLSVGRGQKL
41Physcomitrella_patens_subsp_    VRLVIQGKHL  ELTDAIKQYV  EEKVGNAVHN  QSALVKEVDV  RMSVGRGERL
77Galdieria_sulphuraria_Locald    KLIVVTGNNI  ELTEALHKYV  EEKVGKAILK  YIHFVVKVEV  HLSVAHNPSI
45Cyanidioschyzon_merolae_Euka    TPITVTGDNI  DLTSALREHV  LDKIGHVVEK  FPGLVTRVEV  HLSVAHNPRI
49Cyanophora_paradoxa_Localdb_    MAFVLHGGGI  ELTEAIRAYV  EEKIGHSVET  FKNFVTGVDV  HLQVSKNPRV
33Prochlorococcus_marinus_str_    MKLIHGGKNI  ELTGALKEYT  EAKIEKATHH  YKDIVKEADI  HLSIEKNPRL
31Prochlorococcus_marinus_str_    MKLLIHGRNL  ELTQSLRDYT  KTKIDKATHN  FQEMVQEADV  HLSVARNPRV
20Synechococcus_sp__RCC307_Bac    MKLLIHGRNL  EVTPALRDYT  ETKLSRAVSH  FNGMVQEADV  HLSVARNPRV
39Synechococcus_sp__WH_7803_Ba    MKLLIHGRNL  DVTPALRDYT  ETKLDRAIHN  FGLDVKEADV  HLSVARNPRV
27Synechococcus_sp__WH_8102_Ba    MKLLIHGRNL  EITPALRDYT  QTKLERATHH  FGNAVREADV  HLSVARNPRV
05Prochlorococcus_marinus_str_    MKLLIHGRNL  ELTPALREYT  QSKLERAIQH  FEDMVKEADV  HLSVARNPSV
08Synechococcus_sp__RS9917_Bac    MKLLIHGRNL  ELTPALRDYT  QSKLERAVQH  FDDMVKEADV  HLSVARNPRV
34Gloeobacter_violaceus_PCC_74    MQFAIHGKNI  EVTEPIRDYV  SSKLDKVFH  FDQLTMGVDV  YLSVARNPRI
24Chamaesiphon_minutus_PCC_660    MKLVLQSKNI  EITDAIRDYV  NQKIEKAVSH  FEQITTEIDI  NLSVAKNPRI
16Halotheca_sp__PCC_7418_Bacte    MKLLIQGNNI  EVTEAIRNYV  QEKLENAVKH  FQQITSKVDV  HLSVAPNSRV
29Synechococcus_sp__JA-2-3Ba_2    TKLVIQGKNV  EITDAIRSYV  QEKIERAVSH  FAQITSEVDV  NLSVARNPRI
13Stanieria_cyanosphaera_PCC_7    MKLLIQGNNI  TVTDAINDYV  HNKLEKAVKH  YQNITTKVDV  HLSVAKNARV
03Cyanotheca_sp__PCC_8802_Bact    MKLLIQGNNI  DVTESIHDYV  QEKLEKAVKH  FQSITTKVDV  HLSVARNARI
02Cyanobacterium_aponinum_PCC_    MKLLIQGNNI  EVTESIHDYV  EEKLEKAVKH  FQNLATKVDV  HLSVARNARI
10Gloeocapsa_sp__PCC_73106_Bac    MKLLIQGNNI  VVTDAIHDYV  QKLERAVKH  FQALTTKVDV  HLSVAKNDRI
07Cyanotheca_sp__PCC_7424_Bact    MKLLIQGNNI  TVTEAIHDYV  QKLEKAVKH  FQTLTTKVDV  HLSVAKNARI
06Synechocystis_sp__PCC_6803_B    MKLLIQGNNI  TVTEAIHDYV  EEKVERAVKH  FQNLTTKVDV  HLSVARNARI
09Pleurocapsa_sp__PCC_7327_Bac    MKLLIQGNNI  TVTEAIHDYV  EQKLEKAVKH  FQGMTTKVDV  HLSVARNARI
04Scillatoriales_cyanobacteri    MKLVIQGKNI  EITDSIREYV  NQKIEKAVNH  FQTMITEVDV  HLSVARNPRI
36Rivularia_sp__PCC_7116_Bacte    MKLVIHGKNI  EITDAIREYV  HQKIEKAANH  FHHITNEVDV  HLSVAKNPRI
22Synechocystis_sp__PCC_7509_B    MKLVIHGKNI  ELTDAIREYV  HQKIEKAVNH  FQSLTTEVDV  HLSVARNPRI
19Cyanotheca_sp__PCC_7425_Bact    MKLVIHGKNI  EITDAIRDYV  QKIEKAANH  FQNLTTIDV  HLSVARNPRI
17Microcoleus_sp__PCC_7113_Bac    MKLVIQGKNI  EITDAIREYV  HQKIEKAVNH  FQNMTEVDV  HLSVARNPRI
21Scillatoria_acuminata_PCC_6     MKLVIHGKNI  EITEAIREYV  NQKVEKAVSH  FQNLTTTEVDV  HLSVAKNPRN
30Scillatoria_sp__PCC_6506_Ba    MKLVIQGKNI  EITDAIREYV  NQKIDKAVNH  FQTLTTTEVDV  HLSVARNPRI
28Calothrix_sp__PCC_6303_Bacte    MKLVIHGKNI  EITDAIREYV  HQKIEKAVSH  FQTLTTTEVDV  HLSVARNNR-

```

23Chroococcidiopsis\_thermalis\_ MKLVIHGKNI EITDAIREYV NQKIEKAVNH FQTLTTEVDV HLSVARNPRI  
 11Gloeocapsa\_sp\_PCC\_7428\_Bact MKLVIHGKNI EITDGIREYV HQKIEKAVNH FQNLTNEVDV HLSVARNPRI  
 12Fischerella\_sp\_JSC-11\_Bacte MKLVIHGKNI EITDAIREYV HQKIEKAVSH FQNITNEVDV HLSVARNPRI  
 32Nostoc\_punctiforme\_PCC\_73102 MKLVIIHKN I EITDAIREYV HQKIEKAASH FQSITNEVDV HLSVARNPRI  
 25Calothrix\_sp\_PCC\_7507\_Bacte MKLVIHGKNI EITDAIREYV HQKIEKAVNH FQNITNEVDV HLSVARNPRI  
 26Anabaena\_variabilis\_ATCC\_294 MKLVIHGKNI EITDAIREYV HQKIEKAVNH FQNITNEVDV HLSVARNPRI  
 14Nostoc\_sp\_PCC\_7107\_Bacteria MKLVIHGKNI EITEAIRDYV HQKIEKAVSH FQNITNEVDV HLSVARNPRI  
 18Nostoc\_sp\_PCC\_7524\_Bacteria MKLVIHGKNI EITDAIREYV HQKIEKAVNH FQNITNEVDV HLSVARNPRI  
 51Ectocarpus\_siliculosus\_Local APIIVTGNV EVTEPLKEYV EKKMAKVLDK VGSSVSKVDV HLSVNKNPSV  
 35Phaeodactylum\_tricornutum\_CC VPVIINGQNI ELTPALVEHV NKRIQQINK LASAIQECDV ILSVSKNPKV  
 15Thalassiosira\_pseudonana\_CCM APIVVTGDNI DLTPALSDYV NSKIEKTVGK LPLAVSHCDV YLTVNKNPKV

## 51

44Calliarthron\_tuberculosis\_Eu ARHKAEEVAF AGKTI LRAEV RAVDMYAAID LVEERVGRTL RKYKERKAGR  
 46Porphyridium\_cruentum\_Eukary NGHSAEEVVQ VKNVIRAET KSEMYASID AVTDKLRTRL RKYKERNNSH  
 65Emiliana\_huxleyi\_Localdb\_L EAHIAEVTAL CRDQVIRVRH ESEDMYASLD LLADQLSRKL RKYKERRGGT  
 48Aureococcus\_anophagefferens\_ DSDVAEEVVV CKGEVVRAEE RSPSMYSSID LVADKVARKL RYKVKERKEGK  
 01QUERY\_Bigel\_rps22\_51185 NAHKIEVTYV VKDKVIRGSV SSVSEYSSID LVTDLVNRKL RKYKERKEGK  
 42Lotharella\_amoebiformis\_Euka NAHKVEVTYV VKDKVMRGTV SSISEYSSID LVTDLVNRKL RKYKERKFDK  
 38Brachypodium\_distachyon\_Euka --SRCEITLF TKRGVVRAEE EEESYASID VAAAVVKRKL RKIKEKE-TD  
 37Selaginella\_moellendorffii\_E --QKCEVTMF TTKGVVRAEE ATDSMYSID RVSDVVARKL RKIKEKD-GH  
 41Physcomitrella\_patens\_subsp\_ --QRCEVTLF TTKGVVRAEE EAESMYASID RVSDVISRKL RKIKEKDGGH  
 77Galdieria\_sulphuraria\_Locald LRHTSEVTVF ARKHVLRASE TAETMYAAID LVSDITERKL QRYKERLHIH  
 45Cyanidioschyzon\_merolae\_Euka NAHDCEVTAY ARGVLRASV KMENMYAAID LTADKLRTRL RKYKERLHDR  
 49Cyanophora\_paradoxa\_Localdb\_ FTQSAEVTYV AQQQVLRASE RTENLYASID LVSEKIGRNL RKYKEKRQDK  
 33Prochlorococcus\_marinus\_str\_ SYQTAEVTIF ASGTIIRAEE K TENLYSSID LVS NKLCRKL RKYKERHYKN  
 31Prochlorococcus\_marinus\_str\_ PQQTAEVTVF ANGTVIRAQE RSENL YASID LVANKLARQL RKYKERHNSH  
 20Synechococcus\_sp\_RCC307\_Bac PQQTAEVTLF ASGTVIRAQE RSQNL YASID LVAGKLARQL QRHKDRRQGH  
 39Synechococcus\_sp\_WH\_7803\_Ba PQQTAEVTVF ANGTVIRAQE RSENL YASID LVASKLARQL RRFKDRHSDH  
 27Synechococcus\_sp\_WH\_8102\_Ba PQQTAEVTVF ANGTVIRAQE RSENL YASID LAASKLARQL RRWKERHSDH  
 05Prochlorococcus\_marinus\_str\_ PQQTAEVTVF ANGTVIRAQE RSENL YASID LVASKLCRQL RRYKERHSDH  
 08Synechococcus\_sp\_RS9917\_Bac PQQTAEVTVF ANGTVIRAQE RSENL YASID LVASKLCRQL RRFKERHSDH  
 34Gloeobacter\_violaceus\_PCC\_74 RSHSAEVTVQ ASGTIIRAEE ETENLYASID LVADKLHRQM RKYKERMQKK  
 24Chamaesiphon\_minutus\_PCC\_660 AAQVAEVTIY VNGAVIRAEE ASEHLYASID LVADKISRKL RKYKERNFTK  
 16Halotheca\_sp\_PCC\_7418\_Bacte DRTKAEVTVH ANGKVIRAQE QSGDLYASID LVADKIARQL RKYKEKHLHK  
 29Synechococcus\_sp\_JA-2-3Ba\_2 ASQSAEVTYV ANGTVIRAEE SSENLYASID RVADKLARKL RKYKERNGIH  
 13Stanieria\_cyanosphaera\_PCC\_7 NKHKAEVTYV ANGTVIRAQE GSENL YASID MVSDKIARQL RKYKEKLLDQ  
 03Cyanotheca\_sp\_PCC\_8802\_Bact NKHKAEVTYV ANGTVIRAQE GSENL YASID LVSDKIARQL RKYKEKLNK  
 02Cyanobacterium\_aponinum\_PCC\_ NKHKAEVTYV ANGTIIRAQE HSENL YASID LVSDKITRQL RKYKERNLAK  
 10Gloeocapsa\_sp\_PCC\_73106\_Bac DKHKAEVTYV ANGTVIRAQE GSENL YASID LVADKIARQL RKYKERKLEK

07Cyanothecce\_sp\_\_PCC\_7424\_Bact NKHKAQEVTVY ANGTVIRAQE GSENLVYASID LVSDKIQARQL RKYKERKLEQ  
 06Synechocystis\_sp\_\_PCC\_6803\_B NKHKAQEVTVY ANGTVIRAQE GSENLVYASID LVADKIQARQL RKYKER-IQD  
 09Pleurocapsa\_sp\_\_PCC\_7327\_Bac DKHKAQEVTVY ANGAVIRAQE GSENLVYASID LVSDKIQARQL RKYKER-LQD  
 04Oscillatoriales\_cyanobacteri SKQVAQEVTVY VNGSVVRAEE GSENLVYASID MVADKISRQL RKYKEKRYDK  
 36Rivularia\_sp\_\_PCC\_7116\_Bacte PNQTAEVTVY ANGNIIRAEE SSENLYASID LVANKIQARQL RKYKERRRDK  
 22Synechocystis\_sp\_\_PCC\_7509\_B SKQSAQEVTVY ANGSVIRAEE SSESLYASID LVADKIQARQL RKYKERRQAN  
 19Cyanothecce\_sp\_\_PCC\_7425\_Bact PKQTAEVTVY TNGSVIRAEE SSENLYASID LVSDKIQARQL RKFKERRQDK  
 17Microcoleus\_sp\_\_PCC\_7113\_Bac SKQTAEVTVY ANGTVIRAQE GSEDLYASID LVADKIQARQL RKYKEKLQHK  
 21Oscillatoria\_acuminata\_PCC\_6 SKQTAEVTVY ANGTIIRAEE SSENLYASID LVADKIQARQL RKYKEKRHAQ  
 30Oscillatoria\_sp\_\_PCC\_6506\_Ba TKQTAEVTVY ANGSVIRAEE SSESLYASID LVADKIQARQL RKFKEKRQDK  
 28Calothrix\_sp\_\_PCC\_6303\_Bacte PVQAAQEVTVY ANKNVIRAEE SSENLYASID LVADKISRQL RKYKERLQNK  
 23Chroococcidiopsis\_thermalis\_ PKQAAQEVTVY ANGTVIRAEE SSENLYASID LVADKIQARQL RKYKEKLQDK  
 11Gloeocapsa\_sp\_\_PCC\_7428\_Bact DRQAAQEVTVY ANGSVIRAEE SSENLYASID MVADKIARKL RKYKEKRHDK  
 12Fischerella\_sp\_\_JSC-11\_Bacte PKQAAQEVTVY ANGNVIRAEE SSENLYASID LVADKIQARQL RKYKERRHDK  
 32Nostoc\_punctiforme\_PCC\_73102 TRQAAQEVTVY ANGSVIRAEE SSENLYASID LVADKIQARQL RKYKERRQDQ  
 25Calothrix\_sp\_\_PCC\_7507\_Bacte TRQAAQEVTVY ANGSVIRAEE SSENLYASID LVADKIQARQL RKYKERRQDK  
 26Anabaena\_variabilis\_ATCC\_294 TRQAAQEVTVY ANGSVIRAEE SSENLYASID LVADKISRQL RKYKERKQDQ  
 14Nostoc\_sp\_\_PCC\_7107\_Bacteria PKQAAQEVTVY ANGSVIRAEE SSENLYASID LVADKIQARQL RKYKERRQDK  
 18Nostoc\_sp\_\_PCC\_7524\_Bacteria PKQAAQEVTVY ANGSVIRAEE SSENLYASID LVADKISRQL RKYKERRQDK  
 51Ectocarpus\_siliculosus\_Local DNHNTQEVTVF SKNHVIRATD NSDNMYASVD QVTDRIQRKL RRFKERKVGK  
 35Phaeodactylum\_tricornutum\_CC NGRHVEVTVN LKGTSTIICHN ESPDMYASID AASHALYRKL CKYKDNRVGG  
 15Thalassiosira\_pseudonana\_CCM DAHTAEVTVT LKGTTFRVAE SSPDMYASID LVAARLARKL RKYKERRLGG

101

44Calliarthron\_tuberculosis\_Eu SRK----- ----- ----- AIEKNSDLAS APVDGGEALD  
 46Porphyridium\_cruentum\_Eukary DGPHTADLGE ESADEYVDDQ EGAKAL---- HMVEREVIPL PKMTVQEAVT  
 65Emiliana\_huxleyi\_Localdb\_L AEAEEDEAE SLAQFAAADT ASDAAAAMPD EVVREKKFAM PPISVEEAVV  
 48Aureococcus\_anophagefferens\_ RSKPKLKLAE AISTALEEEL FDA----- TLIRKKKYPM PEQSLVDAMV  
 01QUERY\_Bigel\_rps22\_51185 RTATFYTISD SSVG-GAAVD VQQEYSGIPE SVVRRKKFPM PPISIEDATL  
 42Lotharella\_amoebiformis\_Euka RASTFYRISD SSSDIGAEAD V-QEFQVPE AVVRKR-----  
 38Brachypodium\_distachyon\_Euka VRHLKGSWQT AAAAFSESDV DEEDEDELVE KVVRTKVFEM APLTVDEALE  
 37Selaginella\_moellendorffii\_E GR--RLPVGE ILRESSTAPP TPAEPPDFPD EIVRTKIFDM PPLKINDAMD  
 41Physcomitrella\_patens\_subsp\_ GRPAKYSIGE VLNEVVDLDP ILEKPDLDLPE EVVRTKYFEM RPMKPLEALE  
 77Galdieria\_sulphuraria\_Locald GPKAVNPETD LVRRPSRGDL VDKSSDNLPE DVVVRKRSFPV PRQTVAEAVL  
 45Cyanidioschyzon\_merolae\_Euka RTRSAPVMDG LAVPATSPVP VDDGAPPELPS RVVRRKKRFPM PLQTVEEAVL  
 49Cyanophora\_paradoxa\_Localdb HPR----- -ADSPSPAPG VDEEVFAAPA PVVKKKQFPM PAMTVDDALE  
 33Prochlorococcus\_marinus\_str\_ LNYKNKHTNT NELDSIDKNI FNDREAKLPE PSIKNKYFEM IPISLEEARK  
 31Prochlorococcus\_marinus\_str\_ NVHTKSVEDT Q-FSSSDHSL TEGKEPHLPS PGVRRKYFEM TPMNIEQARV  
 20Synechococcus\_sp\_\_RCC307\_Bac GHHAEP---- --VMPLQGDM LQGRHAELPA PVVRRKYFAM PPMSVEEAIH  
 39Synechococcus\_sp\_\_WH\_7803\_Ba HHSASETTES VLDEAIVESL LDGKEVQLPS PGVRRKYFSM PPMTLEQARQ

|    |                                      |            |            |            |            |             |
|----|--------------------------------------|------------|------------|------------|------------|-------------|
| 27 | <i>Synechococcus</i> _sp__WH_8102_Ba | HHSASTTTEA | VTDSQVDGSL | LQGREAELPD | PGVRRKYFAM | PPMSLEEARR  |
| 05 | <i>Prochlorococcus</i> _marinus_str_ | HHSASSTTEA | VIEAPIDGSL | LDGKEAHLPS | PGVRRKYFAM | PPMSVEQARH  |
| 08 | <i>Synechococcus</i> _sp__RS9917_Bac | HHSASETDA  | IAAAPIDGSL | LDGKEVQLPD | PGVRRKYFAM | PPMSLEEARRH |
| 34 | <i>Gloeobacter</i> _violaceus_PCC_74 | PKPKTGL--A | VAQAPISLPN | GDEKATALPK | EVRTTKYFAM | PPMSPEEALD  |
| 24 | <i>Chamaesiphon</i> _minutus_PCC_660 | KDRTEGLIGE | ELLELLDYNL | TDNRSATLPA | EVRTTKYFAL | SALTIEEAMA  |
| 16 | <i>Halothece</i> _sp__PCC_7418_Bacte | KTHDSPKTAE | TVPQPVEDL  | VNDRAPELDP | DVVRVKYFAM | PAMTVMEAKD  |
| 29 | <i>Synechococcus</i> _sp__JA-2-3Ba_2 | RVRHTPKTSV | AVQQPVTDPL | NTERQAEPLA | EVRTTKYFAM | PPMTVQEALH  |
| 13 | <i>Stanieria</i> _cyanosphaera_PCC_7 | KTQTATKTGE | LVEGTVANDL | FSDRSPELNP | EVVRMKYFSM | PPMTIEEALQ  |
| 03 | <i>Cyanothece</i> _sp__PCC_8802_Bact | KAPNPVKVGE | VTATAIEGDL | IGDRTPELPA | EVIRMKYFAM | PPMTIDEALH  |
| 02 | <i>Cyanobacterium</i> _aponinum_PCC_ | KHTHAEKTS  | AVEKTVGTDL | IGDREPELPS | EVVRMKYFAM | TPMTIDQALE  |
| 10 | <i>Gloeocapsa</i> _sp__PCC_73106_Bac | KTNAHVKVT  | VVEEPTANL  | IGDRTPELPA | EVVRMKYFTM | PPMTIEEALD  |
| 07 | <i>Cyanothece</i> _sp__PCC_7424_Bact | NAHSPVKAGE | VVQETIEENL | IGDRQPELPP | EVVRMKYFGM | PPMSIDEALE  |
| 06 | <i>Synechocystis</i> _sp__PCC_6803_B | KQHGNVKTSE | IVDKPVEENL | IGDRAPELPS | EVLRMKYFAM | PPMAIEDALE  |
| 09 | <i>Pleurocapsa</i> _sp__PCC_7327_Bac | KKVASVKAGE | IVEKPVSETL | IGDRTPELPP | EVVRMKYFAM | PPMSIEEALE  |
| 04 | <i>Scillatoriales</i> _cyanobacteri  | YHPSVKTAEV | LSDQPVVTEL | PTNRTPELPA | QVVRTKYFAM | PPMSVQEALE  |
| 36 | <i>Rivularia</i> _sp__PCC_7116_Bacte | KIHDRTNEEI | I-PEEMVTDL | IGDRTPELPE | EVRTTKYFAM | PPMTVSQALE  |
| 22 | <i>Synechocystis</i> _sp__PCC_7509_B | KASVETTVD  | EEQIPLVSDL | IGDRTPQLPA | EVRTTKYFAM | PPMTVSEALE  |
| 19 | <i>Cyanothece</i> _sp__PCC_7425_Bact | HSRSK--EEP | VVSVPLVTDL | TGDRTPELPE | EVRTTKYFAM | PPMTLREALE  |
| 17 | <i>Microcoleus</i> _sp__PCC_7113_Bac | KTHDQPKTGI | VVQVPVDDL  | IGDRTAELPS | DVVRMKYFAM | PPMTMEEALE  |
| 21 | <i>Scillatoria</i> _acuminata_PCC_6  | KVQAPDTNEA | LLEQPLVEDL | IGERTPELPE | EVRTTKYFAM | PPMSVLEALE  |
| 30 | <i>Scillatoria</i> _sp__PCC_6506_Ba  | THTNPKVGDV | VAEPPVSDL  | IGDRTPELPS | EVLRSKYFAM | PPMTMQEALE  |
| 28 | <i>Calothrix</i> _sp__PCC_6303_Bacte | KNNLVENSEV | VEEIPVNDL  | IGSRTPELPE | EVRTTKYFAM | SPMTISEALE  |
| 23 | <i>Chroococcidiopsis</i> _thermalis_ | KTQPKTSLEA | V-EPPVNDL  | IGDRTPELPS | EVRTTKYFAM | PPMTLNEALE  |
| 11 | <i>Gloeocapsa</i> _sp__PCC_7428_Bact | KTQVPEKTSI | AVPAPVVEDL | IGDRTPELPE | EVRTTKYFAM | PPMTITEALE  |
| 12 | <i>Fischerella</i> _sp__JSC-11_Bacte | KTHAQTGIEG | VVQQTVVTDL | IGNRAPELPE | EVRTTKYFAM | PPMTVTEALE  |
| 32 | <i>Nostoc</i> _punctiforme_PCC_73102 | KTQSQPT-EV | VVAESVVDL  | IGDRTPELPN | EVRTTKYFSM | PPMTLAEALE  |
| 25 | <i>Calothrix</i> _sp__PCC_7507_Bacte | ITQSPPTTDV | LVPEPVAADL | IGDRTPELPN | EVRTTKYFSM | PPMTLAEALE  |
| 26 | <i>Anabaena</i> _variabilis_ATCC_294 | KTQALPTTET | IVPETVVADL | IGDRTPELPE | EVRTTKYFSM | PPMTVTEALE  |
| 14 | <i>Nostoc</i> _sp__PCC_7107_Bacteria | KTHAQSTTEV | VVPEPVPDL  | IGDRTPELPS | EVRTTKYFSM | PPMTLAEALE  |
| 18 | <i>Nostoc</i> _sp__PCC_7524_Bacteria | KTQAQPTNEV | VVPQPVVADL | IGDRTPELPE | EVRTTKYFSM | PPMTLAEALE  |
| 51 | <i>Ectocarpus</i> _siliculosus_Local | SGVEKTADM  | AAAEAADEDP | FEDKYGDEPE | MVVKTKSFP  | PAISLEEAVT  |
| 35 | <i>Phaeodactylum</i> _tricornutum_CC | EKMNDIMLEN | LEVSEYTATP | VAEEYVD-PE | PITKVKNFDT | KPMSVQEAUF  |
| 15 | <i>Thalassiosira</i> _pseudonana_CCM | PNMENIALNA | IEVDESEDGA | EEESYID-PD | AVTKVK---S | TPISIKEAIF  |

151

|    |                                      |            |             |            |         |  |
|----|--------------------------------------|------------|-------------|------------|---------|--|
| 44 | <i>Calliarthron</i> _tuberculosis_Eu | SAD-----   | ---EEEEEDGL | SDVYANGTSN | IGVLPPV |  |
| 46 | <i>Porphyridium</i> _cruentum_Eukary | VLAF-QTNFH | VFREVSSNKI  | CVIFKKEGGG | IGLVEPE |  |
| 65 | <i>Emiliana</i> _huxleyi_Localdb_L   | CLEYIEHDFY | AFRNAATGEV  | NVYKRDEGG  | LGWISPS |  |
| 48 | <i>Aureococcus</i> _anophagefferens_ | CMDGLDHDFY | MFKSEETGQI  | NVIYKR---- | -----   |  |
| 01 | QUERY_Bigel_rps22_51185              | CLDYLDHDFY | VFRNSETKEI  | NVYRRAEGG  | VGLIEPE |  |

|                                |             |             |            |         |
|--------------------------------|-------------|-------------|------------|---------|
| 42Lotharella_amoeboformis_Euka | -----DSR    | CHRSP-----  | -----      | -----   |
| 38Brachypodium_distachyon_Euka | QLENVDHDFY  | AFRNEQTGEV  | NILYKRKEGG | FGLIIPK |
| 37Selaginella_moellendorffii_E | HMANIGHDFY  | AFRNAESGEV  | NILYKRKEGG | YGIIPR  |
| 41Physcomitrella_patens_subsp_ | QLVNVGHDFY  | AFRNVESGEI  | NILYKRTHGG | YGIIVPR |
| 77Galdieria_sulphuraria_Locald | CLEYIDHDFY  | VFRNSETGEV  | NIVYRRNHGG | VGLIVPE |
| 45Cyanidioschyzon_merolae_Euka | CLDYIDHDFY  | VFRNADTGEV  | NVVYRRRHGG | VGLIEPE |
| 49Cyanophora_paradoxa_Localdb_ | CLGYLDHDFY  | VFRNKATNEI  | NVVYERHEGG | YGLIEPE |
| 33Prochlorococcus_marinus_str_ | QLDLIDHDFY  | VFRNKKNEL   | QVIYKRKHGG | YGLIQSK |
| 31Prochlorococcus_marinus_str_ | QLDLIDHDFY  | LFREEEGSAL  | RVIYKRNHGG | YGVIEK  |
| 20Synechococcus_sp__RCC307_Bac | QLEVIDHDFY  | VFRNADNGEL  | QVVYQRNHGG | YGVIEAR |
| 39Synechococcus_sp__WH_7803_Ba | QLDLIDHDFY  | LFRDSASGDL  | QVIYRRNHGG | YGVIEAR |
| 27Synechococcus_sp__WH_8102_Ba | QLDLIDHDFY  | LFRDKSDQL   | QVIYRRNHGG | YGVIQAR |
| 05Prochlorococcus_marinus_str_ | QLDLIDHDFY  | LFREQESGQL  | QVIYRRNHGG | YGVIQAR |
| 08Synechococcus_sp__RS9917_Bac | QLDVIDHDFY  | LFRDASTGDL  | QVIYRRNHGG | YGVIQAR |
| 34Gloeobacter_violaceus_PCC_74 | HLALVDHDFY  | VFRNAESGEI  | NVLYARNHGG | YGLIVPR |
| 24Chamaesiphon_minutus_PCC_660 | QLQLVDHDFY  | VYRSVETGEV  | NVVYRRNHGG | FGVIQPR |
| 16Halotheca_sp__PCC_7418_Bacte | QLQLVDHDFY  | VFRNEETNEI  | NVIYQRNHGG | YGVIPR  |
| 29Synechococcus_sp__JA-2-3Ba_2 | QLELVDHDFY  | VFRNIENGEI  | NVIYVRNHGG | YGLIRPR |
| 13Stanieria_cyanosphaera_PCC_7 | QLQLVDHDFY  | MFLNKDTNEI  | NVIYVRNHGG | YGVIPR  |
| 03Cyanotheca_sp__PCC_8802_Bact | QLELVDHDFY  | MFRNKDTDEI  | NVIYQRNHGG | YGVIPH  |
| 02Cyanobacterium_aponinum_PCC_ | QLQLVDHDFY  | MFRNEETGEI  | NVIYQRNHGG | YGVIPR  |
| 10Gloeocapsa_sp__PCC_73106_Bac | QLQLVDHDFY  | MFRNSATDEI  | NVIYMRNHGG | YGVIPR  |
| 07Cyanotheca_sp__PCC_7424_Bact | QLQLVDHDFY  | MFRNRDTNEI  | NVIYIRNHGG | FGVIQPR |
| 06Synechocystis_sp__PCC_6803_B | QLQLVDHDFY  | MFRNKDTDEI  | NVIYIRNHGG | YGVIPH  |
| 09Pleurocapsa_sp__PCC_7327_Bac | QLQLVDHDFY  | MFRNRDTNEI  | NVIYLRNHGG | YGVIPR  |
| 04Scillatoriales_cyanobacteri  | QLELVDHDFY  | VFRNAETGEI  | NVVYERNHGG | YGVIPR  |
| 36Rivularia_sp__PCC_7116_Bacte | QLRLVGHDFY  | MFHNSSETDEI | NVIYERNHGG | YGVIQAR |
| 22Synechocystis_sp__PCC_7509_B | QLQNVHDHDFY | MFCNAESGEI  | NVIYERNHGG | YGVIPR  |
| 19Cyanotheca_sp__PCC_7425_Bact | QLELVDHDFY  | MFRNAETGEI  | NVIYERNHGG | YGVIPR  |
| 17Microcoleus_sp__PCC_7113_Bac | QLQLVDHDFY  | MFRNAKTGEI  | NVIYERNHGG | YGVIPR  |
| 21Scillatoria_acuminata_PCC_6  | QLQLVDHDFY  | MFRNADTGEI  | NVIYERNHGG | YGLVQPR |
| 300scillatoria_sp__PCC_6506_Ba | QLQVIDHDFY  | MFRNAETGEI  | NVIYERHHGG | YGVIPR  |
| 28Calothrix_sp__PCC_6303_Bacte | HLQLVGHDFY  | MFNNSSETGEI | NVIYERNHGG | YGVIPR  |
| 23Chroococcidiopsis_thermalis_ | QLQLVDHDFY  | MFRNAETGEI  | NVIYERNHGG | YGVIPR  |
| 11Gloeocapsa_sp__PCC_7428_Bact | QLQLVDHDFY  | MFRNAETGEI  | NVIYERNHGG | YGVIPR  |
| 12Fischerella_sp__JSC-11_Bacte | QLQLVGHDFY  | MFRNSETGEI  | NVIYERNHGG | YGVIPR  |
| 32Nostoc_punctiforme_PCC_73102 | QLQLVGHDFY  | MFRNSETGEI  | NVIYERNHGG | YGVIPR  |
| 25Calothrix_sp__PCC_7507_Bacte | QLQLVGHDFY  | MFHNAETGEI  | NVIYERNHGG | YGVIPR  |
| 26Anabaena_variabilis_ATCC_294 | QLQLVGHDFY  | MFHNAETGEI  | NVIYERNHGG | YGVIPR  |
| 14Nostoc_sp__PCC_7107_Bacteria | QLQLVGHDFY  | MFRNAETGEI  | NVIYERNHGG | YGVIPR  |

4-rps22.txt

|    |                                     |            |            |            |         |
|----|-------------------------------------|------------|------------|------------|---------|
| 18 | <i>Nostoc_sp__PCC_7524_Bacteria</i> | QLQLVGHDFY | MFRNAETGEI | NVIYERNHGG | YGVIQPR |
| 51 | <i>Ectocarpus_siliculosus_Local</i> | CLEYIGHDFY | LFRNEETNEV | NVYKRSKSGG | VGLIEPE |
| 35 | <i>Phaeodactylum_tricornutum_CC</i> | ALDYIDHDFY | VFRNAETNEI | SVVYKRHVGG | IGLVEP- |
| 15 | <i>Thalassiosira_pseudonana_CCM</i> | ALDYIDHDFY | VFRDEETNEV | SVVYKRNAGG | VGLIQPE |



## Alignment: PMP

|                                  |             |             |            |             |            |
|----------------------------------|-------------|-------------|------------|-------------|------------|
| 007Lyngbya_sp__PCC_8106_Bacter   | SWFWLKLALD  | IRSSVIRSIW  | RRVLASMIFA | GLINFINQPI  | LSSLIPSIVL |
| 008Xenococcus_sp__PCC_7305_Bac   | QKFWLGIIFH  | LQESVVPVIW  | HRVLGIMVFA | IIITLASYNF  | TYNLIPSIVL |
| 035Cyanobacterium_aponinum_PCC   | KRKWFREAFR  | VKYSVFPDVG  | EKALFFAIFS | FVICLLQQPI  | LSSLIPTIVL |
| 006Leptolyngbya_sp__PCC_7375_B   | DRRWFKTLFC  | LRGSVIRAVM  | PRVGICVGFA | LIVTLLSWPI  | LGGVVPSIVL |
| 069Trichodesmium_erythraeum_IM   | EKRWLTVIFQ  | MQYSVIPSI   | FRVIFCGLFG | FIISILTLPI  | KNSIVPSLVL |
| 083Leptolyngbya_sp__PCC_6406_B   | ETHWFLVLF   | WQGSVLPVAVL | PRAFCCALFG | ALVADFSPLV  | LGSVVPSIVL |
| 048Gloeocapsa_sp__PCC_73106_Ba   | NKRWFKLLLT  | LKGSVIPAIL  | PRVIFCGLFA | WVISAIISLDI | LSSLVPSIVL |
| 009Lyngbya_sp__PCC_8106_Bacter   | DNKWFQLAFR  | VSGSVIPAIL  | PRVIFCFLFG | VGLSILPTRI  | LDNLVDPDLV |
| 196Microcoleus_sp__PCC_7113_Ba   | KKRWFRRVALR | LQGSVIFAIL  | PRVILCSTFG | FLITGFSWPA  | LSGVVPSIVL |
| 107Trichodesmium_erythraeum_IM   | RNKWLKLLLT  | LKGSIVPQVW  | QRVAVAMIFS | AIITILHQPI  | LVSLIPSIVL |
| 037Criminalium_epipsammum_PCC_93 | ERNWFQLAFN  | FKSSVILNIK  | TQVFLSMVMA | FLITLLSQPI  | LAGLIPGIIL |
| 063Microcoleus_vaginatus_FGP-2   | DRNWFKLALD  | LKSSVIRDIT  | TQVLLSMVMA | SIITIVSQPI  | LAGLIPGIIL |
| 253Euglena_gracilis_Eukaryota__  | RDGIFRAALG  | ILRSIMGRLS  | FEVSMIAFLA | TLICVISLPL  | SIFSLTAPSL |
| 039Physcomitrella_patens_subsp   | KSSHVRHVCT  | ILSSLIRAIG  | PPVFLCTLVS | VFVAVIKIVAT | LPFTLTSPVL |
| 045Physcomitrella_patens_subsp   | RSSHVRHFAS  | SFSSAILSLI  | PPVGTMTAIS | VFVALYHASS  | LSYQLTAPAL |
| 074Selaginella_moellendorffii__  | RSSHARHMAS  | TFSSVIISLI  | PPVFTVTGIS | VLVTLYHAPS  | LPYELTAPAL |
| 241Brachypodium_distachyon_Euk   | RSSHLRHLLS  | SLSSVILSLA  | PPVSAFTAVA | AAVATYTASS  | LPYQLTAPAL |
| 129Oryza_sativa_Japonica_Group   | RSSHLRHLLS  | SLTSVILSLA  | PPVSAFTAFA | AAIATYTASS  | LPYQLTAPAL |
| 205Zea_mays_Eukaryota__Viridip   | RSSHLRHLLT  | SLSSAILSLA  | PPVSAFTAFA | AAIATYTASS  | LPYELTAPAL |
| 225Sorghum_bicolor_Eukaryota__   | RTSHLRHLLT  | SLSSAILSLA  | PPVSAFTAFA | AAIATYTASS  | LPYQLTAPAL |
| 181Glycine_max_Eukaryota__Viri   | RSSHLRHVFS  | SLSSVILSLV  | PPVLFFTAFA | AAIAAYRTSS  | LPYQLTAPAL |
| 089Arabidopsis_thaliana_Eukary   | RSSHVRHLLS  | SFSSVILSLI  | PPVFFFTSVA | VVIASYSRSS  | LPYQLTAPAL |
| 102Arabidopsis_lyrata_subsp_1    | RSSHVRHLLS  | SFSSVILSLI  | PPVFFFTSVA | VVIASYSRSS  | LPYQLTAPAL |
| 084Vitis_vinifera_Eukaryota__V   | RSSHVRHLLS  | SFSSVILSLI  | PPVIAFTSVA | VIVASYRASS  | LPYQLTAPAL |
| 237Populus_trichocarpa_Eukaryo   | RSSHVRHLLS  | SLSSVILSLV  | PPVIAFTSVA | VVVASYRTSS  | LPYQLTAPAL |
| 183Ricinus_communis_Eukaryota__  | RSSHLRHLLS  | SLQSVILSLI  | PPVIAFTSVA | VIIASYSRASS | LPYQLTAPAL |
| 018Volvox_carteri_f__nagariens   | RSQMKRLFT   | IPQSVIQNAL  | PSILWVGIVS | SALAAYNASC  | SAFSNTSVAL |
| 033Chlamydomonas_reinhardtii_E   | RSSFAERLFQ  | LSQSILQNAL  | PAISWVTLVA | TLVASYNASC  | TAFSNTSVAL |
| 239Thalassiosira_pseudonana_CC   | RSSFAKNLFS  | MVNSVYKSLA  | KEVFATTAVA | SAIVAWVLPL  | TPFTLLSPSL |
| 042Phaeodactylum_tricornutum_C   | RNSVYENLQG  | IFFSIVRQLK  | SEVSLVALMA | TLVVLWMVPA  | LPFTLSSPAL |
| 113Micromonas_pusilla_CCMP1545   | RSSSLFGNLSG | TLTSVVRSL   | TEVAAVATIA | TFTCAWQLPA  | LPFTLSPAL  |
| 119Aureococcus_anophagefferens   | SL-WLHCLST  | WPRSVLERIK  | NPLAAIVGWS | AVVAAWPLGT  | GLHTLVGGAL |
| 124Ectocarpus_siliculosus_Loca   | KFRWWHNLRT  | LPTSILHRIK  | HPLLVQTFWA | TAVSLV---I  | KPHTLLGSAL |
| 001QUERY_Bigel_pmp_86489_N9      | ---WLYILRA  | MPRSTLAGI-  | KRVITVVLWS | LALAI---F   | ASPALVTPAL |
| 154Emiliana_huxleyi_Localdb__    | STRWLSSLKT  | LRHSVLSGIL  | QPLLLTTTAS | LGVALFKALF  | QMHSLLGGAL |
| 265Porphyridium_cruentum_Eukar   | -----       | -----       | -----      | -----       | -----      |
| 257Calliarthron_tuberculosum_E   | -----       | -----       | -----      | -----       | -----      |
| 218Thalassiosira_pseudonana_CC   | -----       | -----       | -----      | -----       | -----      |

|     |                                     |            |            |            |            |            |
|-----|-------------------------------------|------------|------------|------------|------------|------------|
| 003 | <i>Phaeodactylum tricornutum</i> _C | RILWFHSAIT | LPNSILRDIR | NPVIAITSWA | SFLSILYFPT | APHSLMMSAL |
| 005 | <i>Thalassiosira pseudonana</i> _CC | HMCWKHNMK  | LPSSILRDVG | NPVGHVFWA  | TFWSVVTVPT | TAHSMMSAM  |
| 187 | <i>Pyropia yezoensis</i> _Localdb__ | RFLWSRNLVS | LPSSVLRIS  | SHVAFNVVTA | TAVVVAHLSP | LPHVLLGTAL |
| 256 | <i>Lotharella amoeboformis</i> _Euk | -----      | -----      | -----      | -----      | -----      |

## 51

|     |                                      |            |            |             |             |             |
|-----|--------------------------------------|------------|------------|-------------|-------------|-------------|
| 007 | <i>Lyngbya</i> _sp__PCC_8106_Bacter  | GLLLVFRTNT | AYERYWEGRK | LWGVMIHNGR  | VLARNIYFFK  | TNDRESIQLV  |
| 008 | <i>Xenococcus</i> _sp__PCC_7305_Bac  | GLLLVFRTNT | AYARFWEGCR | AWGTKLISSR  | ILARNISTMD  | DPLQRFIKLV  |
| 035 | <i>Cyanobacterium aponinum</i> _PCC  | GLLLVFRTNS | ANERFWEGRK | LWGGIVNHLR  | NLTWQIWNVNE | TPDQEALNLL  |
| 006 | <i>Leptolyngbya</i> _sp__PCC_7375_B  | GLLLVFRTNA | SYERFWEGRK | LWGNIVNTR   | NLARQIIVSS  | ---RQALKLL  |
| 069 | <i>Trichodesmium erythraeum</i> _IM  | GLLLVFRTNT | AYERFWQGRQ | LWGNIVNIVR  | NFARQIIVTN  | NQDREIIRLL  |
| 083 | <i>Leptolyngbya</i> _sp__PCC_6406_B  | GLLLVFRTNT | AYERFWEGRK | IWGHLINLSR  | NLARHIWVSR  | VEDRHMLRLL  |
| 048 | <i>Gloeocapsa</i> _sp__PCC_73106_Ba  | GLLLVFRTNT | AYDRFWEGRK | LWGTLVNTR   | NLARGIIVCT  | KPDRIALRLL  |
| 009 | <i>Lyngbya</i> _sp__PCC_8106_Bacter  | GLLLVFRTNT | AYDRFWEGRK | LWGTLVNTR   | NFARQIIVTN  | DPDTQTLKLL  |
| 196 | <i>Microcoleus</i> _sp__PCC_7113_Ba  | GLLLVFRTNT | AYERFWEGRK | LWGTLVNTR   | NLARQIWAAN  | KPDRTTLRLL  |
| 107 | <i>Trichodesmium erythraeum</i> _IM  | GLLLVFRTNT | SYDRFWEGRK | ATGGIIISCR  | SLSRQIIVNK  | TPDTEVIRLL  |
| 037 | <i>Crinalium epipsammum</i> _PCC_93  | GLLLVFRTNT | AYERFWEGWQ | IAGMTIFTGR  | NLSRQMMWTR  | TLDSQYLRLV  |
| 063 | <i>Microcoleus vaginatus</i> _FGP-2  | GLLLVFRTNT | AYERFWEGWQ | IAGMTIFTGR  | NISRPMWLTN  | TLQSQFVRLI  |
| 253 | <i>Euglena gracilis</i> _Eukaryota__ | GLLLVFRTNA | SYGRWDETRR | LFGQACNRCR  | ELARKAMTKE  | APRLRFLRYL  |
| 039 | <i>Physcomitrella patens</i> _subsp  | ALLLVFRTNT | SYQRFDEARK | AWGSNVNRRAR | DLARQALTWP  | GDKKLLRYT   |
| 045 | <i>Physcomitrella patens</i> _subsp  | ALLLVFRTEA | SYSRYDEARK | TWTEVISSSK  | DMARQALAWP  | ADRKLLDYI   |
| 074 | <i>Selaginella moellendorffii</i> _  | ALLLVFRDTE | SYSRYDEARK | TWTEVISSTK  | NLARLTEAWD  | D----LMRYI  |
| 241 | <i>Brachypodium distachyon</i> _Euk  | ALLLVFRTEA | SYARFDEGRK | AWIRVLGAA   | ELVGMVMHPT  | DEAGRLVNYI  |
| 129 | <i>Oryza sativa Japonica</i> _Group  | ALLLVFRTEA | SYARFDEGRK | AWMRVIAAAA  | DLAGMAMRHH  | NPATRLNLYI  |
| 205 | <i>Zea mays</i> _Eukaryota__Viridip  | ALLLVFRTEA | SYARFDEGRK | AWMRVLASAA  | DLAGMLMRHD  | DELRRLVNYV  |
| 225 | <i>Sorghum bicolor</i> _Eukaryota__  | ALLLVFRTEA | SYARFDEGRK | AWMRVLGAA   | DLAGMLMHH   | DDLRRLLINYI |
| 181 | <i>Glycine max</i> _Eukaryota__Viri  | ALLLVFRTEA | SYSRFVEGKK | AWTNVIAGTH  | DFARQVAAIN  | NFIKHLHYI   |
| 089 | <i>Arabidopsis thaliana</i> _Eukary  | ALLLVFRTEA | SYSRYEEGRK | AWVGIIAGTN  | DLARQVICSD  | ELIKDLLRYI  |
| 102 | <i>Arabidopsis lyrata</i> _subsp_1   | ALLLVFRTEA | SYSRYEEGRK | AWVGIIAGTN  | DLARQVICSD  | ELIKDLLRYI  |
| 084 | <i>Vitis vinifera</i> _Eukaryota__V  | ALLLVFRTEA | SYSRFEEGRK | AWTKIIAGTN  | DFARQVAGD   | ALLKLLQYI   |
| 237 | <i>Populus trichocarpa</i> _Eukaryo  | ALLLVFRTEA | SYSRFEDGKT | AWTKVISGNT  | DFARQVISGN  | SALKSLLRYI  |
| 183 | <i>Ricinus communis</i> _Eukaryota__ | ALLLVFRTEA | SYSRYEEGRK | AWTKVISGVN  | DFARQVIATD  | AVLKNLLQYV  |
| 018 | <i>Volvox carteri</i> _f__nagariens  | SLLLVFRTNS | SYGRWDEARK | MWGGLLNRSR  | DIMRQGATCD  | Q--VELARWV  |
| 033 | <i>Chlamydomonas reinhardtii</i> _E  | SLLLVFRTNS | SYGRWDEARK | MWGGLLNRSR  | DIMRQGATCD  | Q--VELARWT  |
| 239 | <i>Thalassiosira pseudonana</i> _CC  | GLLLVFRTNS | SYGRWDEARK | MWGLNINHTR  | DLNRMATAWD  | NQIDPVSPLYT |
| 042 | <i>Phaeodactylum tricornutum</i> _C  | GLLLVFKTNT | SYARWYEARG | TWSKLTQSLS  | NLVRMASTFA  | -DVTQLATAA  |
| 113 | <i>Micromonas pusilla</i> _CCMP1545  | GLLLVFRTNA | SYARWVESRV | AWGRVVSCHR  | NVMRQSSLWD  | REFVVLRGKA  |
| 119 | <i>Aureococcus anophagefferens</i>   | SLLLVFRTNT | AYTRYWEGRE | IFGRLATGTR  | DLVDFVGLYV  | LRFRRVGGGA  |
| 124 | <i>Ectocarpus siliculosus</i> _Loca  | GLLLVFRTNA | AYQRFQEGRK | LWEEVLNVS   | DIARMSTLYG  | RRVQRIANLL  |
| 001 | QUERY_Bigel_pmp_86489_N9             | GLLLVFRTNA | AYNRFWEGCK | LWEQLIAKSR  | TLIRYASMYG  | KEVRRISHLL  |

|     |                                    |            |             |            |            |            |
|-----|------------------------------------|------------|-------------|------------|------------|------------|
| 154 | <i>Emiliana_huxleyi_Localdb__</i>  | SLLLVFRTNS | AYNRFWEARR  | IWENLLNRCR | ELARYAYCFQ | PCVDRLAQLL |
| 265 | <i>Porphyridium_cruentum_Eukar</i> | -----      | -----       | -----      | -----      | -----      |
| 257 | <i>Calliarthron_tuberculosis_E</i> | -----      | -----       | -----      | -----      | -----      |
| 218 | <i>Thalassiosira_pseudonana_CC</i> | -----      | -----       | -----      | -----      | -----      |
| 003 | <i>Phaeodactylum_tricornutum_C</i> | GLLLVFRTNS | AYQRFTEGRT  | IWEQIINSSR | DLFRLMMLYD | LVMKTVDDEA |
| 005 | <i>Thalassiosira_pseudonana_CC</i> | SLLLVFRTNS | AYQRFAGEGRK | IWEDIVDVAR | DFSRMLKLYS | LLMRRVNDPN |
| 187 | <i>Pyropia_zezoensis_Localdb__</i> | GLLLSYRTSA | AYDRFWEARK  | VLGGMVNETR | NIMRMAVTGT | MHLQGTSED  |
| 256 | <i>Lotharella_amoeboformis_Euk</i> | -----      | -----       | -----      | -----      | -----      |

## 101

|     |                                     |            |             |             |             |            |
|-----|-------------------------------------|------------|-------------|-------------|-------------|------------|
| 007 | <i>Lyngbya_sp_PCC_8106_Bacter</i>   | STLVVVIKVV | VRNIETELKN  | LLTVANWLAD  | YLIRMYINR   | FFIELNQSID |
| 008 | <i>Xenococcus_sp_PCC_7305_Bac</i>   | PVLMSSVKAH | LRSEIEQRGQL | VLGIINWFSS  | YFYRNYISDK  | LFTELSGLLD |
| 035 | <i>Cyanobacterium_aponinum_PCC</i>  | TVFAIATKNH | LRGISEEMRP  | LLSIAAYLGE  | YLQQEYLNEY  | QLTNMQQLIN |
| 006 | <i>Leptolyngbya_sp_PCC_7375_B</i>   | VAFAIATKQH | LRPCAHELNH  | LVTIAFWLGD  | YLQVQQINSY  | QLQAMTSQLN |
| 069 | <i>Trichodesmium_erythraeum_IM</i>  | VAFAIASKLH | LRKINLELQG  | YMPIAFLIGD  | YLNQYVNPY   | QLTALFQLLD |
| 083 | <i>Leptolyngbya_sp_PCC_6406_B</i>   | VAFAIALKLH | LRPPNAELAA  | MMTVAFWMAD  | YLQDCHINTY  | QLAAMNLLIN |
| 048 | <i>Gloeocapsa_sp_PCC_73106_Ba</i>   | VAFAIATKLH | LREVNQELAD  | LMPIAFLWAD  | YLQKQSL SAY | QLVAMQKLIN |
| 009 | <i>Lyngbya_sp_PCC_8106_Bacter</i>   | IAFAIAMKLH | LRKINQEIED  | LLSIALWIGD  | YLQRQYLN TY | QLTAMFKLLD |
| 196 | <i>Microcoleus_sp_PCC_7113_Ba</i>   | IAFAVATKLH | LRRLNNELEP  | LMSIAFWIGD  | YLQKQHLNTY  | QLSAMLKLLD |
| 107 | <i>Trichodesmium_erythraeum_IM</i>  | AGFLIGTKLH | LRSLDLKIRS  | IISIAKWIGD  | YFRKAYIDSI  | QLSTYNQILD |
| 037 | <i>Crinalium_epipsammum_PCC_93</i>  | TAFFMAMKQH | LRRVDEQLKS  | VLSVTQWIGG  | YLTKQYIDSI  | QFAALNRLLD |
| 063 | <i>Microcoleus_vaginatus_FGP-2</i>  | PAFFMAMKQH | LRGVDQSLKS  | VLSVTQWIGG  | YLTKQYIDSI  | QFAAINRLLD |
| 253 | <i>Euglena_gracilis_Eukaryota__</i> | QAFPVFLKVY | LRNLVEDLQG  | TLEVFQCLTE  | IIQRAKLDTA  | TAIAMEHSVS |
| 039 | <i>Physcomitrella_patens_subsp</i>  | KAYSFCLMHH | LRCLRKELEA  | IVNVLQVISD  | IINECQITPW  | ERIAMDKNIT |
| 045 | <i>Physcomitrella_patens_subsp</i>  | LAFPVALKCH | LLDIAEELRE  | ILELIQLMTL  | SLKSIKFDG   | EGMQLDANIS |
| 074 | <i>Selaginella_moellendorffii__</i> | VAFPLALKCH | LIDMEADLRK  | VLDLLQMIFQ  | IIDGLSLGET  | QQVLLHENIS |
| 241 | <i>Brachypodium_distachyon_Euk</i>  | LAFPVALKCH | ITDIRKDLQG  | LLAIIEFISQ  | SLQMLDFEEH  | RRSIMESKLS |
| 129 | <i>Oryza_sativa_Japonica_Group</i>  | LAFPLALKCH | IIDIKRDLQG  | LLSIIEFISQ  | SLYMLDFDEN  | KRNIMESKLS |
| 205 | <i>Zea_mays_Eukaryota__Viridip</i>  | LAFPVALKCH | IIDVKGDLG   | LLGIIEFIAQ  | SLQMLDLDEQ  | KRSIMVSKLS |
| 225 | <i>Sorghum_bicolor_Eukaryota__</i>  | LAFPVALKCH | IIDVKGDLQG  | LLAIIEFISQ  | SLQMLDLDEQ  | KRSIMESKLS |
| 181 | <i>Glycine_max_Eukaryota__Viri</i>  | IAFPIALKCH | VLDVRRDLQH  | LLEIIEFISQ  | SIRLLKLEES  | RRNVLESKIT |
| 089 | <i>Arabidopsis_thaliana_Eukary</i>  | AAFPVALKCH | VIDIARDLRN  | LIEVIEFISQ  | SIQLLKLDDA  | KRDLESKML  |
| 102 | <i>Arabidopsis_lyrata_subsp_1</i>   | AAFPVALKCH | VIDIARDLRN  | LIEVIEFISQ  | SIQLLKLDDA  | KRDLESKML  |
| 084 | <i>Vitis_vinifera_Eukaryota__V</i>  | MAFPVALKCH | VIDIRQDLQN  | LLEIIEFISQ  | SLQLLNLLDA  | KRHVLESKLS |
| 237 | <i>Populus_trichocarpa_Eukaryo</i>  | MAFPIALKCH | VTNIGQDLQN  | LLEIIEFISQ  | CLQLLNLDDES | MRNLLESKIS |
| 183 | <i>Ricinus_communis_Eukaryota__</i> | IAFPVALKCH | VIDINRDLRN  | LLEIIEFISQ  | SLQLLNLEES  | KRHLESKIS  |
| 018 | <i>Volvox_carteri_f_nagariens</i>   | VAFARALRIH | FQSESELKN   | ILTAIHAI SQ | IIQSVPMSSI  | HQMMSNNLT  |
| 033 | <i>Chlamydomonas_reinhardtii_E</i>  | VAFSRALRIH | FQTIESELQN  | ILTAIHAI SQ | IIQSVPMSSI  | HQQMMSNNLT |
| 239 | <i>Thalassiosira_pseudonana_CC</i>  | WAFVRSMKRH | LSAFVEELYA  | RMAALYDLSV  | VIDKLPMHFM  | RKNEINKNLS |
| 042 | <i>Phaeodactylum_tricornutum_C</i>  | WLVCRSVMNE | LWAYRKDVEQ  | AFAALAEASL  | ALDAIPIDEK  | RRVEMDKSLV |

|     |                             |            |            |            |             |            |
|-----|-----------------------------|------------|------------|------------|-------------|------------|
| 113 | Micromonas_pusilla_CCMP1545 | WAFPRCLASH | VSALARELRL | RLGALADLSY | CMNNLPIDEK  | RRVEMDKSII |
| 119 | Aureococcus_anophagefferens | DGAPIPLETF | LGVAAALGVP | DLELCTLLAR | EIKAVAFTR   | ERLYVLKRVA |
| 124 | Ectocarpus_siliculosus_Loca | ACHAVILQEH | LQWEDLLRPE | VRDVNMISR  | EIKSVPWSSR  | ERLAILSMCN |
| 001 | QUERY_Bigel_pmp_86489_N9    | SAMGIVLKQH | LTQETAYLER | LLDISNLIAR | EVHSSIPGGGE | ERIHMLKLVD |
| 154 | Emiliana_huxleyi_Localdb__  | TAFPVMLRRH | LCAPLAPLPA | LCDLCKRLAA | EISGVSFTSR  | ERLMGLSLVN |
| 265 | Porphyridium_cruentum_Eukar | -----      | -----      | -----      | -----       | -----      |
| 257 | Calliarthron_tuberculosis_E | -----      | -----      | -----      | -----       | -----      |
| 218 | Thalassiosira_pseudonana_CC | -----      | -----      | -----      | -----       | -----VN    |
| 003 | Phaeodactylum_tricornutum_C | YKREPENTIL | LYDDAEAAAV | NAEVCDRMAM | ELRAVPFTNR  | ERLALISHVD |
| 005 | Thalassiosira_pseudonana_CC | VVRDPENSL  | LYTDPEIAAM | YDEVCDRMAK | ELAVVDFTNR  | ERMALIEYTA |
| 187 | Pyropia_yezoensis_Localdb__ | GVAEYLTPEQ | LVRPMAVAML | ATA--ALVNA | RAGVGANLLA  | ERQEMEKLVT |
| 256 | Lotharella_amoeboformis_Euk | -----      | -----      | -----      | -----       | -----      |

## 151

|     |                              |            |            |            |            |            |
|-----|------------------------------|------------|------------|------------|------------|------------|
| 007 | Lyngbya_sp__PCC_8106_Bacter  | RILEAMIACD | RIASSPLPKA | YSIHLKHL   | IYCLSVPTF  | VEELNWLTVP |
| 008 | Xenococcus_sp__PCC_7305_Bac  | AIVGALSSCE | RILNTPMPKA | YSIHLKHL   | IYCAGLPQF  | VAQLDWWWVL |
| 035 | Cyanobacterium_aponinum_PCC  | QLMDMVGCE  | RILKTPIPNS | YSIHLKQLL  | IYCLVLPFQ  | VDQIEWWTIP |
| 006 | Leptolyngbya_sp__PCC_7375_B  | SLVNSLGGCE | RILNTPPLA  | YSIHLKQLL  | MYCLALPFQ  | VSELNGWTIP |
| 069 | Trichodesmium_erythraeum_IM  | KMVEALTSCE | GILKTPIPLA | YSIHLRQLL  | IYCLLPFQI  | VNQFYFWTGL |
| 083 | Leptolyngbya_sp__PCC_6406_B  | GMVDAIGGCE | RILKTPIPLA | YSVHLKQLL  | LYCLALPFQ  | VDSMHGWTAL |
| 048 | Gloeocapsa_sp__PCC_73106_Ba  | ILVDCLGGCE | RIIRTPLPMA | YSIHLRQLL  | IYCLSLPFQ  | VEELVWFTGP |
| 009 | Lyngbya_sp__PCC_8106_Bacter  | TMVDVLGACE | RIIKTPIPLA | YNIHLKQILL | IYCLVLPQL  | TDDLWYGTI  |
| 196 | Microcoleus_sp__PCC_7113_Ba  | TMVDVLGACE | RILKTPIPLA | YSIHLKQLL  | LYCLSLPFM  | VNDLHWWTAV |
| 107 | Trichodesmium_erythraeum_IM  | SMVKDETACE | RILNTPIPLA | YAIHLKHLLF | LYCFALPFQ  | VAKLSWITIL |
| 037 | Crinalium_epipsammum_PCC_93  | QLVECLSRCE | RILAAMPKA  | YSIHLRHLLI | LYCLALPFQ  | VKDLQWWTIP |
| 063 | Microcoleus_vaginatus_FGP-2  | QLVECLSRCE | RILAAMPKA  | YSIHLRHLLI | LYCLALPFQ  | VKDLQWCTIP |
| 253 | Euglena_gracilis_Eukaryota__ | ALADMYTALD | RLLRTPIPLS | YTSLTTRFLV | LWLVLLPLAL | SAD-----   |
| 039 | Physcomitrella_patens_subsp  | QFHDNVGACE | RIFKTPIPVA | YTRLTSRVL  | LWHLVLPFAL | WETCGWHTIT |
| 045 | Physcomitrella_patens_subsp  | QFNESISVCE | RLIRTPIPLA | YTRLTSRILV | LWHLSPVVL  | WDDCHWVVVP |
| 074 | Selaginella_moellendorffii__ | TYNRSVSACE | RLIRTPIPLS | YTRLTSRFLI | LWHLGLPIAL | WDTCNWLVIP |
| 241 | Brachypodium_distachyon_Euk  | GFLEGICVCE | QIIGIPVPLS | YTRLTSRFLV | LWHLTLPVIL | WSECKWIVVP |
| 129 | Oryza_sativa_Japonica_Group  | CFLEGISVCE | QLIGIPIPLS | YTRLTSRFLV | LWHLTLPVIL | WDECKWIVVP |
| 205 | Zea_mays_Eukaryota__Viridip  | CFLEGIGVCE | QLMGIPIPLA | YTRLTSRFLV | LWHLTLPIIL | WEECKWIVVP |
| 225 | Sorghum_bicolor_Eukaryota__  | CFLEGIGVCE | QLMGIPIPLS | YTRLTSRFLV | LWHLTLPVIL | WEECKWIVVP |
| 181 | Glycine_max_Eukaryota__Viri  | CFHEGIGICD | QLMGIPIPLA | YTRLTSRFLV | LWHLTLPIIL | WDDCHWIVVP |
| 089 | Arabidopsis_thaliana_Eukary  | HLHEGIGVCE | QLMGIPIPLS | YTRLTSRFLV | FWHLTLPIIL | WDECHWIVVP |
| 102 | Arabidopsis_lyrata_subsp_1   | HLHEGIGVCE | QLMGIPIPLS | YTRLTSRFLV | FWHLTLPIIL | WDECHWIVVP |
| 084 | Vitis_vinifera_Eukaryota__V  | CFHEGIGVCE | QLMGIPIPLS | YTRLTSRFLV | LWHLTLPIIL | WEDCNWIVVP |
| 237 | Populus_trichocarpa_Eukaryo  | CFHEGIGVCE | QLMGIPIPLS | YTRLTSRFLV | LWHLTLPIIL | WDDCHWIVVP |
| 183 | Ricinus_communis_Eukaryota__ | CLHEGIGVCE | QLMGIPIPLS | YTRLTSRFLV | LWHLTLPIIL | WDDCHWIVVP |

|     |                                    |            |            |            |             |            |
|-----|------------------------------------|------------|------------|------------|-------------|------------|
| 018 | <i>Volvox carteri_f_nagariens</i>  | FFHDVGGCE  | RLLRAPIPVS | YTRHTARFLF | MWLTLLPFAL  | YGQCGLGVVP |
| 033 | <i>Chlamydomonas reinhardtii_E</i> | FFHDVGGCE  | RLLRAPIPVS | YTRHTARFLF | AWLTLLPFAL  | YPTTGWGVVP |
| 239 | <i>Thalassiosira pseudonana_CC</i> | IFEDTLGGCE | RLLSSPVPLF | YTRHTARFLS | TWLLLLPLAM  | YQPFSWAMIP |
| 042 | <i>Phaeodactylum tricornutum_C</i> | LMGDGISVCQ | RVFASPVPLV | YTRHTSRFLS | LWMLLLPGAL  | YETFAWGLIP |
| 113 | <i>Micromonas pusilla_CCMP1545</i> | LLGDALETCE | RIFTSPVPLV | YTRHTARFLS | FWLLLLPLAL  | WEPFGWAMIP |
| 119 | <i>Aureococcus anophagefferens</i> | ELRATIAQAE | RIVQTPVPLH | YARHTSRFLS | VWCFTLPLCL  | APMVAYVAPP |
| 124 | <i>Ectocarpus siliculosus_Loca</i> | KLGSTIGGCE | RLVQTPVPLH | YVRHTSRFLT | IWCFLPLPLVI | VGEMGMATAP |
| 001 | QUERY_Bigel_pmp_86489_N9           | EITGVISACE | RIVQTPVPLN | YARHTSRFLT | IWCLTLPIAL  | VANLGFVSVV |
| 154 | <i>Emiliana huxleyi_Localdb__</i>  | QLGSYVGACE | RLLQTPVPLN | YARHTSRFLT | LWCLTLPVSL  | VGSMGLLVVP |
| 265 | <i>Porphyridium cruentum_Eukar</i> | -----GMCE  | RIVKTPVPLS | YSRHTSRFLS | LWCLTLPVIF  | VKADDWLVLV |
| 257 | <i>Calliarthron tuberculosum_E</i> | -----GACE  | RIVKTPVPLS | WSRHTRRLS  | IWALTLPVLV  | VPLEGVMSVP |
| 218 | <i>Thalassiosira pseudonana_CC</i> | HLSDALSGCE | KIVQTPVPLS | YSRHTSRFLT | LWCGFLPFAI  | VSQLGWLSIP |
| 003 | <i>Phaeodactylum tricornutum_C</i> | KLSRCIGGSE | RIHQTVVPLN | YARHTLRALT | VWLFSLPFV   | VKDLKLLTGP |
| 005 | <i>Thalassiosira pseudonana_CC</i> | KLSRSIGACE | RIHQTLVPLN | YARHALRSLT | VWLWTLPFAL  | VKDLGLLTGP |
| 187 | <i>Pyropia yezoensis_Localdb__</i> | LLVDYLGMC  | RIVLTPVPLN | YSRHTSRFLS | LWTASLTVVL  | VELQGPFLIL |
| 256 | <i>Lotharella amoebiformis_Euk</i> | -----GACE  | RIQGCVPVLS | YSRHLSRYLT | IWSMTLPYVL  | TPILGWYSIP |

## 201

|     |                                      |             |            |            |           |  |
|-----|--------------------------------------|-------------|------------|------------|-----------|--|
| 007 | <i>Lyngbya sp_PCC_8106_Bacter</i>    | AVGVITFSLL  | GIEEIGLEIE | NPFNDLPLEK | FCYILQNDS |  |
| 008 | <i>Xenococcus sp_PCC_7305_Bac</i>    | VTGVTSFALL  | GIEAIGLEIE | DPFNDLPLDL | YCQKIYGEF |  |
| 035 | <i>Cyanobacterium aponinum_PCC</i>   | FVSIVSYIVY  | GIEAIALEIE | NPFNDLPLDQ | ICQAINQN- |  |
| 006 | <i>Leptolyngbya sp_PCC_7375_B</i>    | VVALVAFVAVF | GVEEIGLEIE | NPFNDLPLNA | ICQTMENHI |  |
| 069 | <i>Trichodesmium erythraeum_IM</i>   | VVAIISFTVL  | GIEEIALEIE | NPFNDLPLDS | ICTTMHHNV |  |
| 083 | <i>Leptolyngbya sp_PCC_6406_B</i>    | IVGLISFAVF  | GIEEIGIEIE | NPFNDLPLDL | ICLTMKRNC |  |
| 048 | <i>Gloeocapsa sp_PCC_73106_Ba</i>    | FVALISFTVF  | GIEEIGIEIE | NPFNDLPLDQ | ICHTMQVNV |  |
| 009 | <i>Lyngbya sp_PCC_8106_Bacter</i>    | VVGIISFTLF  | GIEEIGREIE | NPFNDLELDA | ICQTMQRNV |  |
| 196 | <i>Microcoleus sp_PCC_7113_Ba</i>    | VVGLISFAVF  | GIEEIGIEIE | NPFNDLPLDT | ICATMERNV |  |
| 107 | <i>Trichodesmium erythraeum_IM</i>   | VVGIISFALL  | GIEAIGLEIE | NPFNDLPLDN | MCDKLLLEK |  |
| 037 | <i>Criminalium epipsammum_PCC_93</i> | VVGGVAFALF  | GIEAIGLEIE | NPFNDIPLDR | LCQKLDSQ  |  |
| 063 | <i>Microcoleus vaginatus_FGP-2</i>   | VVGVVAFALF  | GIEAIGLEIE | NPFNDIPLDR | LCQKLHNDE |  |
| 253 | <i>Euglena gracilis_Eukaryota__</i>  | -----       | -----      | -----      | -----     |  |
| 039 | <i>Physcomitrella patens_subsp</i>   | VSVFSSAALF  | YIEEVGMIE  | EPFSILALST | ICTGIVAAW |  |
| 045 | <i>Physcomitrella patens_subsp</i>   | ATFISAASLF  | CIEEVGLIE  | EPFPILALDR | MCAKARENS |  |
| 074 | <i>Selaginella moellendorffii__</i>  | STFFSSAALF  | CIEEVGLIE  | EPFPMLALDR | MCEVALIN- |  |
| 241 | <i>Brachypodium distachyon_Euk</i>   | ATFISAASLF  | CIEEVGLIE  | EPFPMLALDE | QCKQLHDSV |  |
| 129 | <i>Oryza sativa_Japonica_Group</i>   | ATFISAASLF  | CIEEVGLIE  | EPFPMLALDE | LCKQLHDSA |  |
| 205 | <i>Zea mays_Eukaryota__Viridip</i>   | ATFISAASLF  | CIEEVGLIE  | EPFPMLALDA | LCKQLHDGV |  |
| 225 | <i>Sorghum bicolor_Eukaryota__</i>   | ATFISAASLF  | CIEEVGLIE  | EPFPMLALDA | LCKQLHDGV |  |
| 181 | <i>Glycine max_Eukaryota__Viri</i>   | ATFISAASLF  | CIEEVGLIE  | EPFATLALDD | LCQKAQTDV |  |
| 089 | <i>Arabidopsis thaliana_Eukary</i>   | ATFISAASLF  | CIEEVGLIE  | EPFPMLALDE | LCDLVHSNI |  |

|     |                                    |             |            |            |           |
|-----|------------------------------------|-------------|------------|------------|-----------|
| 102 | <i>Arabidopsis_lyrata_subsp_1</i>  | ATFISAASLF  | CIEEVGLIE  | EPFPMLALDE | LCDLVHSNI |
| 084 | <i>Vitis_vinifera_Eukaryota_V</i>  | ATFISAASLF  | CIEEVGLIE  | EPFPMLALDE | LCKLVHNNI |
| 237 | <i>Populus_trichocarpa_Eukaryo</i> | STFISAASLF  | CIEEVGLIE  | EPFPMLALDE | LCNVVQSNV |
| 183 | <i>Ricinus_communis_Eukaryota_</i> | ATFISAASLF  | CIEEVGLIE  | EPFPMLALDE | LCNLVNSNI |
| 018 | <i>Volvox_carteri_f_nagariens</i>  | VCTGIAAVLC  | GIEEIGVQCE | EPFGILPLEV | ICNRI---M |
| 033 | <i>Chlamydomonas_reinhardtii_E</i> | VCTGIAAVLC  | GIEEIGVQCE | EPFGILPLDV | ICNRI---M |
| 239 | <i>Thalassiosira_pseudonana_CC</i> | ATALTSVFLF  | GIDELSTQLE | EPFTILPMQG | FCDKIWC-I |
| 042 | <i>Phaeodactylum_tricornutum_C</i> | AVSVVALFLF  | GIEELAIQLE | EPFSILPLDR | IVEGVWCIF |
| 113 | <i>Micromonas_pusilla_CCMP1545</i> | SATLVVAIFFF | GIEELAVQLE | EPFSILPLKR | LCDNVW--F |
| 119 | <i>Aureococcus_anophagefferens</i> | VGVVSWALL   | GLREIGLLIE | NPALDLPYGS | PALNVPTDV |
| 124 | <i>Ectocarpus_siliculosus_Loca</i> | VVFLATWALF  | GIQEIGLLIE | DPFSALSLDI | MCNSVYTDQ |
| 001 | QUERY_Bigel_pmp_86489_N9           | VTALVWAMF   | GIQEIGLMIE | EPFKSLSLHV | FCNTIHNDQ |
| 154 | <i>Emiliana_huxleyi_Localdb__</i>  | VTAFVTWCLF  | GIQEIGLFIE | HCADNGD--I | FMDQLSD-- |
| 265 | <i>Porphyridium_cruentum_Eukar</i> | IMFFVSFSLF  | SIEEIGHLIE | DPFIDLPLEA | MASTINGDG |
| 257 | <i>Calliarthron_tuberculosum_E</i> | TVAVISWGIF  | SIEEIAHIME | DPFYSLPLEG | FCKTIESD- |
| 218 | <i>Thalassiosira_pseudonana_CC</i> | VMLTVSWLLY  | GLEEIGHLIE | QPFTDRPTYL | ISDDVHDDA |
| 003 | <i>Phaeodactylum_tricornutum_C</i> | VLFLVSWMLF  | GVFEIGSAIE | DPF--LRLSI | LCDTIRRDA |
| 005 | <i>Thalassiosira_pseudonana_CC</i> | VVAVVSWVLF  | GVYEIGTRIE | DPF--LRLSI | YCNSVRRDQ |
| 187 | <i>Pyropia_yezoensis_Localdb__</i> | DMLFIAWALF  | GLEEVGHMIE | DPLSSLPFIN | VCNTIRRDV |
| 256 | <i>Lotharella_amoeboformis_Euk</i> | VIGLICWSLF  | SIEEIGHMIE | EPFDQVQTKR | VADVIKRDV |

## Alignment: PDP

|                                |            |             |            |            |             |
|--------------------------------|------------|-------------|------------|------------|-------------|
| 54Cyanidioschyzon_merolae_Euka | TPPCVVKVFG | VGGGGCNAIS  | RMLDGEFRGV | RFAIANTDHQ | ALIENATVVP  |
| 400Streococcus_tauri_Eukaryota | --NAKIKVLG | CGGGGSNAVN  | RMISGGLQGV | EFWTVNTDSQ | ALVNLANKLQ  |
| 23Micromonas_sp_RCC299_Eukary  | VSEARIKVI  | CGGGGGNAVN  | RMINSGLQGV | EFWSLNTDAQ | ALVQQANRIQ  |
| 34Volvox_carteri_f_nagariensi  | GGDARIKVI  | VGGGGGNALN  | RMISSGLQGV | EFWAINNTAQ | ALAAQANKVQ  |
| 39Chlamydomonas_reinhardtii_Eu | GGDARIKVI  | VGGGGGNALN  | RMINSGLQGV | EFWAINNTAQ | ALAAQANKVQ  |
| 36Brachypodium_distachyon_Euka | VETARIKVV  | VGGGGNNAVN  | RMIGSGLQGI | EFYAINNTSQ | ALVNQAHPLQ  |
| 29Physcomitrella_patens_subsp_ | LSGAKIKVI  | VGGGGNNAVN  | RMIGSGIQGV | DFWAINNTVQ | ALQKQAHRVQ  |
| 30Selaginella_moellendorffii_E | MDSARIKVV  | IGGGGNNAVN  | RMIGSGLQGV | DFWAINNTAQ | ALVQSANRLQ  |
| 47Prochlorococcus_marinus_subs | SQNAKIEVI  | VGGGGSNNAVN | RMIDSDLEGV | SFRVLNTDAQ | ALLQSSRRVQ  |
| 51Synechococcus_sp_CC9311_Bac  | SQSARIEVI  | VGGGGSNNAVN | RMILSDLEGV | AYRVLNTDAQ | ALIQSANRVQ  |
| 21Synechococcus_sp_JA-3-3Ab_B  | SNAAKIKVV  | VGGGGGNAVS  | RMAASNKGV  | EFWSINTDAQ | ALAQSTNRLQ  |
| 38Chamaesiphon_minutus_PCC_660 | SNTARIKVI  | VGGGGSNNAVN | RMIASDIEGI | EFWTMNTDAQ | ALSHSDRRIQ  |
| 10Cyanotheca_sp_PCC_8802_Bact  | NNVAKIKVI  | VGGGGCNAVN  | RMISSLTGI  | EFWAINNTAQ | ALSQSAQRLQ  |
| 20Stanieria_cyanosphaera_PCC_7 | SNIAKIKVM  | VGGGGCNAVN  | RMIDSGVSGI | EFWAINNTAQ | ALSHAGQRLQ  |
| 32Gloeobacter_violaceus_PCC_74 | SSVALIKVV  | VGGGGGNAVN  | RMIASNVTGV | EFWAINNTAQ | SLTQSSQRLQ  |
| 25Gloeocapsa_sp_PCC_73106_Bac  | SNVAQIKVI  | VGGGGCNAVN  | RMIERDVSGV | EFWAINNTAQ | ALAHAAAYRLQ |
| 24Chroococcidiopsis_thermalis_ | SRVANIKVI  | VGGGGGNAVN  | RMIESGVTGV | EFWSINTDAQ | ALTHSARKLQ  |
| 09Cyanobacterium_stanieri_PCC_ | SNVAQIKVI  | VGGGGCNAVN  | RMIQSSVSGV | EFWQINTDAQ | ALTESMYCLQ  |
| 28Synechocystis_sp_PCC_6803_B  | SNIAKIKVI  | VGGGGCNAVN  | RMIASGVTGI | DFWAINNTSQ | ALTNTNDICIQ |
| 15Pleurocapsa_sp_PCC_7327_Bac  | SNVAKIKVI  | VGGGGCNAVN  | RMIESGVSGI | EFWAINNTAQ | ALSQSEQRLQ  |
| 11Cyanotheca_sp_PCC_7822_Bact  | SNVAQIKVI  | VGGGGCNAVN  | RMIASGIVGV | EFWSINTDAQ | ALAHSAQRLQ  |
| 13Microcystis_aeruginosa_PCC_9 | SNVAKIKVI  | VGGGGCNAVN  | RMIASGVTGI | EFWAINNTAQ | ALAHSSQRLQ  |
| 41Leptolyngbya_sp_PCC_7376_Ba  | SSVAQIKVI  | VGGGGGNAVN  | RMLESGVSGI | DFWSINTDAQ | ALTNALNRLQ  |
| 22Synechococcus_sp_PCC_7502_B  | SSAAKIKVI  | VGGGGGNAVN  | RMIASEISGV | EFWSLNTDAQ | ALLQSSKRFQ  |
| 44Raphidiopsis_brookii_D9_Bact | GRVANIKVI  | VGGGGGNAVN  | RMIESDVTGV | EFWSINTDAQ | ALTWANSRLQ  |
| 18Rivularia_sp_PCC_7116_Bacte  | GRVANIKVI  | VGGGGGNAVN  | RMIASDLSGV | EFWSINTDAQ | ALTMAACRLQ  |
| 37Fischerella_sp_JSC-11_Bacte  | GRVANIKVI  | VGGGGSNNAVN | RMIASDVSGV | EFWSINTDAQ | ALTLAASRLQ  |
| 43Calothrix_sp_PCC_6303_Bacte  | GRVANIKVI  | VGGGGSNNAVN | RMIASDVNGV | EFWSINTDAQ | ALTLADSRLQ  |
| 31Scillatoriales_cyanobacteri  | GSVAKIKVI  | VGGGGGNAVN  | RMIASDVTGV | EFWSINTDAQ | ALEGSDKRLQ  |
| 45Geitlerinema_sp_PCC_7407_Ba  | SSIARIKVI  | VGGGGCNAVN  | RMIASEVSGV | EFWSINTDAQ | ALTNPQRHLQ  |
| 17Synechocystis_sp_PCC_7509_B  | GRVANIKVI  | VGGGGGNAVN  | RMIASNVSGI | EFWSINTDAQ | ALVQSAKRLQ  |
| 26Scillatoria_acuminata_PCC_6  | SSIAKIKVI  | VGGGGCNAVN  | RMIASEVSGV | EFWAVNTDAQ | ALVQSTKRLQ  |
| 16Gloeocapsa_sp_PCC_7428_Bact  | GRVANIKVI  | VGGGGGNAVN  | RMIASEVSGI | EFWSINTDAQ | ALTNTSRRLQ  |
| 19Coleofasciculus_chthonoplast | GSVARIKVV  | VGGGGGNAVN  | RMIASEVAGI | EFWSINTDSQ | ALSQNSKRLQ  |
| 33Chlamydomonas_reinhardtii_Eu | SDQAIKVLG  | VGGGGSNNAVN | NMVNSDVQGV | EFWIANNTAQ | ALATPVCKVQ  |
| 500Streococcus_lucimarinus_CCE | TNAATIKVV  | VGGGGSNNAVN | RMVDADINGV | EFWIVNTDAQ | ALETVANHLQ  |
| 27Ricinus_communis_Eukaryota_  | SDEAKIKVI  | VGGGGSNNAVN | RMIESSMTGV | EFWVVNTDIQ | AMKTLVNRLQ  |
| 35Selaginella_moellendorffii_E | FNEAKIKVI  | VGGGGSNNAVN | RMVQSEMKGV | EFWIVNTDAQ | AMAMPVNRLQ  |

|     |                              |            |             |            |            |             |
|-----|------------------------------|------------|-------------|------------|------------|-------------|
| 42  | Physcomitrella_patens_subsp_ | YNEAKIKVIG | VGGGGSSNAVN | RMLESEMQGV | EFWIVNTDAQ | AMALPVNRLQ  |
| 06  | Thalassiosira_pseudonana_CCM | TNPCLIKVLG | VGGGGGNAVN  | RMIQTRIDGV | SFWAVNTDAQ | ALAKLANVLN  |
| 12  | Phaeodactylum_tricornutum_CC | A-PCVIKVIG | VGGGGGNAVN  | RMIQTRIEGV | SFWALNTDAQ | ALSKLANVLN  |
| 100 | Ectocarpus_siliculosus_Loca  | VSPVSIKVVG | VGGGGGNAVD  | GMITRKLSGV | EFVAMNTDTQ | ALTKVK--IA  |
| 07  | Thalassiosira_pseudonana_CCM | LSPCVIKVLG | VGGGGSSNAVD | RMLDTRISGV | EFWSINTDAQ | ALGRKAQILN  |
| 08  | Phaeodactylum_tricornutum_CC | LSPCVIRVLG | VGGGGCNAVD  | RMLETAVGGV | EYWAINTDAQ | ALGRKANVLN  |
| 05  | Thalassiosira_pseudonana_CCM | LSPCVIKVVG | VGGGGCNAVD  | RMLDTRVSGV | DFWAINTDAQ | ALGRKARVLN  |
| 14  | Phaeodactylum_tricornutum_CC | LSPCVIKVIG | VGGGGCNAVD  | RMLDTAVGGV | DFWALNTDAQ | ALGRKAKVLN  |
| 108 | Emiliana_huxleyi_Localdb__   | MAPCVIKVVG | VGGGGGNAVN  | RMIQAQTGAV | EYWALNTDIQ | ALDALS NRLG |
| 52  | Lotharella_amoeboformis_Euka | -----      | -----       | -----      | -----      | -----       |
| 53  | Lotharella_amoeboformis_Euka | -----      | -----       | -----      | -----      | -----       |
| 01  | QUERY_Bigel_39262            | ----VQVVG  | IGGGGGNTVN  | RMIDAYDSGV | EFWSINTDVQ | ALSRLANRIQ  |
| 55  | Cyanidioschyzon_merolae_Euka | APPCLIKVIG | VGGGGGNAVN  | RMATGISG-V | EFWAINTDVQ | ALKRAAHTLS  |
| 096 | Aureococcus_anophagefferens  | TAPCCIKVVG | VGGGGGNAVN  | RMVTDAGSFV | DFWAMNTDAQ | ALSR-LNTMN  |
| 04  | Cryptomonas_paramecium_Eukar | SSPCIIKVIG | VGGGGGNAVN  | RMIGSVEG-V | EFWSINTDSQ | ALSRLANTCN  |
| 02  | Hemiselmis_andersenii_Eukary | ASPCIIKVIG | VGGGGGNAVN  | RMVGCVEG-V | EFWSINTDAQ | ALSRLANTCN  |
| 03  | Guillardia_theta_Eukaryota__ | SSPCVIKVIG | VGGGGGNAVN  | RMVGGVEG-V | EFWSINTDAQ | ALSRLANTCN  |

## 51

|     |                               |             |            |            |             |            |
|-----|-------------------------------|-------------|------------|------------|-------------|------------|
| 54  | Cyanidioschyzon_merolae_Euka  | LGESICRGLG  | AGGNPEVGCA | AAEESHDRIA | QAIGGTDLLF  | ITAGMGGGTG |
| 400 | Streptococcus_tauri_Eukaryota | IGEQQVTRGLG | AGGNPELGEI | AANESRDALE | QAVSGSDLVF  | ITAGMGGGTG |
| 23  | Micromonas_sp_RCC299_Eukary   | IGKQVTRGLG  | TGGNPELGKK | AAEESATEIQ | QAVRGADLVF  | VTAGMGGGTG |
| 34  | Volvox_carteri_f_nagariensi   | IGTELTRGLG  | CGGNPELGRQ | AALESEDALR | RMVQGADLVF  | ITAGMGGGTG |
| 39  | Chlamydomonas_reinhardtii_Eu  | IGSELTRGLG  | CGGNPELGRR | AAMESEEALR | RMVQGADLVF  | ITAGMGGGTG |
| 36  | Brachypodium_distachyon_Euka  | IGEQLTRGLG  | TGGNPNLGEQ | AAEESKEVIA | NALRDSDLVF  | ITAGMGGGTG |
| 29  | Physcomitrella_patens_subsp_  | IGEALTRGLG  | TGGKPFLGEQ | AAEESIDIIA | EAVVDADLVF  | ITAGMGGGTG |
| 30  | Selaginella_moellendorffii_E  | IGEELTRGLG  | TGGKPSLGEE | AAEESKDDLK | VAVADS DLVF | ITAGMGGGTG |
| 47  | Prochlorococcus_marinus_subs  | LGQNLTRGLG  | AGGNPSIGQK | AAEESKDELQ | QTLEGS DLVF | IAAGMGGGTG |
| 51  | Synechococcus_sp_CC9311_Bac   | LGQTLTRGLG  | AGGNPSIGQK | AAEESRADLQ | QALQGADLVF  | IAAGMGGGTG |
| 21  | Synechococcus_sp_JA-3-3Ab_B   | IGQKLTRGLG  | AGGNPAIGQK | AAEESSEEIA | AALKGADLVF  | IAAGMGGGTG |
| 38  | Chamaesiphon_minutus_PCC_660  | LGQKLTRGLG  | AGGNPAIGQK | AAEESREEIA | HALEGADLVF  | ITAGMGGGTG |
| 10  | Cyanothece_sp_PCC_8802_Bact   | IGQKLTRGLG  | AGGNPSIGTQ | AAEESRDEIA | QALENTDLVF  | ITAGMGGGTG |
| 20  | Stanieria_cyanosphaera_PCC_7  | IGQKITRGLG  | AGGNPAIGQK | AAEESRDEIA | HALENTDLVF  | ITAGMGGGTG |
| 32  | Gloeobacter_violaceus_PCC_74  | IGQKLTRGLG  | AGGNPSIGQK | AAEESREEIM | TALEGADLVF  | ITAGMGGGTG |
| 25  | Gloeocapsa_sp_PCC_73106_Bac   | VGKKITRGLG  | AGGNPAIGQK | AAEESREEIA | GALENTDMVF  | ITAGMGGGTG |
| 24  | Chroococcidiopsis_thermalis_  | IGQKLTRGLG  | AGGNPAMGEK | AAEESRDEIA | NAIGEADLVF  | ITAGMGGGTG |
| 09  | Cyanobacterium_stanieri_PCC_  | IGQKLTRGLG  | AGGNPSIGQK | AAEESREEIA | KALENTDLVF  | ITAGMGGGTG |
| 28  | Synechocystis_sp_PCC_6803_B   | IGQKLTRGLG  | AGGNPAIGQK | AAEESRDEIA | RSLEGTDLVF  | ITAGMGGGTG |
| 15  | Pleurocapsa_sp_PCC_7327_Bac   | IGQKLTRGLG  | AGGNPAIGQK | AAEESREEIA | HALENTDLVF  | ITAGMGGGTG |
| 11  | Cyanothece_sp_PCC_7822_Bact   | IGQKITRGLG  | AGGNPAIGQK | AAEESRDEIA | HALENTDLVF  | ITAGMGGGTG |



|     |                                      |            |            |             |            |            |
|-----|--------------------------------------|------------|------------|-------------|------------|------------|
| 13  | <i>Microcystis_aeruginosa_PCC_9</i>  | IGTKLTRGLG | AGGNPAIGQK | AAEESRDEIA  | QALEGTDLVF | ITAGMGGGTG |
| 41  | <i>Leptolyngbya_sp_PCC_7376_Ba</i>   | IGQKITRGLG | AGGNPAIGQK | AAEESRDEIA  | QALEGADLVF | ITAGMGGGTG |
| 22  | <i>Synechococcus_sp_PCC_7502_B</i>   | IGQKITKGLG | AGGNPAIGQK | AAEESRAEIA  | HALEGADLVF | ITAGMGGGTG |
| 44  | <i>Raphidiopsis_brookii_D9_Bact</i>  | IGQKLTRGLG | AGGNPSIGQK | AAEESRDEIA  | TALEGADLVF | ITAGMGGGTG |
| 18  | <i>Rivularia_sp_PCC_7116_Bacte</i>   | IGQKLTRGLG | AGGNPAIGQK | AAEESRDEIA  | TALEGADLVF | ITAGMGGGTG |
| 37  | <i>Fischerella_sp_JSC-11_Bacte</i>   | IGQKLTRGLG | AGGNPAIGQK | AAEESRDEIA  | TALDGADLVF | ITAGMGGGTG |
| 43  | <i>Calothrix_sp_PCC_6303_Bacte</i>   | IGQKLTRGLG | AGGNPAIGQK | AAEESRDELA  | AALEGADLVF | ITAGMGGGTG |
| 31  | <i>Oscillatoriales_cyanobacteri</i>  | VGQKLTRGLG | AGGNPAIGQK | AAEESRDEIA  | TALEGADLVF | ITAGMGGGTG |
| 45  | <i>Geitlerinema_sp_PCC_7407_Ba</i>   | IGQKLTRGLG | AGGNPAIGQK | AAEESRDELA  | AAIEGADLVF | ITAGMGGGTG |
| 17  | <i>Synechocystis_sp_PCC_7509_B</i>   | IGQKLTRGLG | AGGNPAIGQK | AAEESRDEIA  | AALENADLVF | ITSGMGGGTG |
| 26  | <i>Oscillatoria_acuminata_PCC_6</i>  | VGQKLTRGLG | AGGNPAIGQK | AAEESRDEIA  | HALEHSDLVF | ITAGMGGGTG |
| 16  | <i>Gloeocapsa_sp_PCC_7428_Bact</i>   | IGQKLTRGLG | AGGNPAIGQK | AAEESREEIA  | AALENADLVF | ITAGMGGGTG |
| 19  | <i>Coleofasciculus_chthonoplast</i>  | VGQKLTRGLG | AGGNPAIGQK | AAEESRDEIA  | QALAESDLVF | ITAGMGGGTG |
| 33  | <i>Chlamydomonas_reinhardtii_Eu</i>  | IGGKLTRGLG | AGGNPEIGAK | AAEESRDSIA  | AALQDMDMF  | VTAGMGGGTG |
| 50  | <i>Streptococcus_lucimarinus_CCE</i> | IGAELTRGLG | AGGNPEIGQK | AAEESRAAIE  | QALSGSDMFV | VTAGMGGGTG |
| 27  | <i>Ricinus_communis_Eukaryota__</i>  | IGKELTRGLG | AGGKPDVGKN | AANESKLAIE  | EALSGADMVF | VTAGMGGGTG |
| 35  | <i>Selaginella_moellendorffii_E</i>  | IGQKLTRGLG | AGGNPEIGMS | AAEESKAIVE  | EAVRGADMVF | VTAGMGGGTG |
| 42  | <i>Physcomitrella_patens_subsp_</i>  | IGQKLTRGLG | AGGNPEIGCS | AAEESKAMVE  | EALRGADMVF | VTAGMGGGTG |
| 06  | <i>Thalassiosira_pseudonana_CCM</i>  | IGRMVTRGLG | AGGVPDVGKK | SALENGEEIK  | QICKGADMVF | ITAGMGGGTG |
| 12  | <i>Phaeodactylum_tricornutum_CC</i>  | IGRQLTRGLG | AGGDPGVGRG | AGEENIEMQ   | HICDNTDLVF | ITAGMGGGTG |
| 100 | <i>Ectocarpus_siliculosus_Loca</i>   | LGSKVTRGLG | AGGKPEVGLA | AATESLPEIE  | KTLAGADLVF | VTAGMGGGTG |
| 07  | <i>Thalassiosira_pseudonana_CCM</i>  | IGSSVTRGLG | AGGDPEIGRL | AAEESREEIN  | AMVSGADLCF | ITSGMGGGTG |
| 08  | <i>Phaeodactylum_tricornutum_CC</i>  | IGSAVTRGLG | AGGDPDVGRL | AAEESAQDIA  | AMIQGTDLCF | VTSGMGGGTG |
| 05  | <i>Thalassiosira_pseudonana_CCM</i>  | IGTTATRGLG | AGGNPDIGQL | AAEESRAEIA  | AMVEGTDLCF | VTSGMGGGTG |
| 14  | <i>Phaeodactylum_tricornutum_CC</i>  | IGASATRGLG | AGGNPEIGRI | AAEESRKEIA  | AMVTGTDLCF | VTSGMGGGTG |
| 108 | <i>Emiliana_huxleyi_Localdb__</i>    | LGAGTSRGLG | AGGSPDTGAA | SAKESFEEIS  | KMVAGSDMFV | VVAGMGGGTG |
| 52  | <i>Lotharella_amoeboformis_Euka</i>  | -----      | -----      | -----       | -----      | -----      |
| 53  | <i>Lotharella_amoeboformis_Euka</i>  | -----      | -----      | -----       | -----      | -----      |
| 01  | QUERY_Bigel_39262                    | IGPEETKGLG | AGSKPEVGKI | AAEESAIEVIG | AIVRDTDMVF | VTAGMGGGTG |
| 55  | <i>Cyanidioschyzon_merolae_Euka</i>  | IGNKLTRGLG | AGGNPEVGRK | AAEESCDQIA  | EAVRGADLVF | VTAGMGGGTG |
| 096 | <i>Aureococcus_anophagefferens</i>   | IGRETRRGLG | AGGKPSQGEA | AAEESRAEIA  | AALSGADMVF | VTAGMGGGTG |
| 04  | <i>Cryptomonas_paramecium_Eukar</i>  | IGAKLTRGLG | AGGNPVIGKK | AAEESKQLIG  | EIVSSGDLVF | ITAGMGGGTG |
| 02  | <i>Hemiselmis_andersenii_Eukary</i>  | IGAKLTRGLG | AGGNPEIGRK | AAEESRDLIG  | EAVSAGDLVF | VTAGMGGGTG |
| 03  | <i>Guillardia_theta_Eukaryota__</i>  | IGAKLTRGLG | AGGNPEIGRK | AAEESRDLIA  | EAVSAGDLVF | VTAGMGGGTG |

101

|     |                                      |            |            |            |            |            |
|-----|--------------------------------------|------------|------------|------------|------------|------------|
| 54  | <i>Cyanidioschyzon_merolae_Euka</i>  | TGAAPVVARI | AKSLGALTVG | VVTKPFSFEG | RHRMQQALDG | VAALRENVDT |
| 400 | <i>Streptococcus_tauri_Eukaryota</i> | SGSAPVVAKL | SKAKGILTVG | VVTYPFSFEG | RRRIQQATEA | IEALRANVDT |
| 23  | <i>Micromonas_sp_RCC299_Eukary</i>   | SGSAPVVARL | SREAGNLTVG | VVTQPFTFEG | RRRFIQAQES | IEQLRANVDT |
| 34  | <i>Volvox_carteri_f_nagariensi</i>   | TGAAPVVARI | SKELGILTVG | VVTYPFNFEG | RRRAGQALEG | IEGLRAAVDS |

|     |                                       |            |            |              |            |             |
|-----|---------------------------------------|------------|------------|--------------|------------|-------------|
| 39  | <i>Chlamydomonas reinhardtii</i> _Eu  | TGAAPVVARL | SKELGILTVG | VVTPFNFEFEG  | RRRAGQALEG | IEALREAVDS  |
| 36  | <i>Brachypodium distachyon</i> _Euka  | SGAAPVVAQI | AKEAGYLTVG | VVTPPFSFEG   | RKRSLQALEA | LEKLEERSVDT |
| 29  | <i>Physcomitrella patens</i> _subsp_  | SGAAPVVARV | AKEAGQLTVG | VVTPPFTFEG   | RRRSQQAVEA | IENLRKSVDS  |
| 30  | <i>Selaginella moellendorffii</i> _E  | SGAAPVVARL | SKEKGQLTVG | VVTPPFTFEG   | RRRSQQALDA | IERLRSNVDT  |
| 47  | <i>Prochlorococcus marinus</i> _subs  | TGAAPVVAEV | AKQSGALTVG | IVTKPFSFEG   | KRRMRQAEEG | IARLAENVDT  |
| 51  | <i>Synechococcus</i> _sp__CC9311_Bac  | TGAAPVVAEV | AKESGALTVG | IVTKPFSFEG   | KRRMRQADEG | IERLAEHVDT  |
| 21  | <i>Synechococcus</i> _sp__JA-3-3Ab_B  | TGGAPIVAQI | AKASGALTVG | VVTRPFSFEG   | KRRTKQAEEG | IQALQEAVDT  |
| 38  | <i>Chamaesiphon minutus</i> _PCC_660  | TGAARIVAEV | AKEMGALTVG | VVTRPFTFEG   | RRRTNQAEEG | ISGLQSQVDT  |
| 10  | <i>Cyanothece</i> _sp__PCC_8802_Bact  | TGAAPIVAEV | AKEMGCLTVG | VVTRPFTFEG   | RRRTSQASQG | VEKLQNNVDT  |
| 20  | <i>Stanieria cyanosphaera</i> _PCC_7  | TGAAPIAAEV | AKEMGCLTVG | VVTRPFTFEG   | RRRTNQAEEG | IAAFGTRVDT  |
| 32  | <i>Gloeobacter violaceus</i> _PCC_74  | TGAAAIVAEA | AKEVGALTVG | VVTRPFTFEG   | RRRMQQADSG | IEALQGRVDT  |
| 25  | <i>Gloeocapsa</i> _sp__PCC_73106_Bac  | TGAAPIVAEV | AKEMGCLTVG | VVTRPFTFEG   | RRRTNQAEEG | INALQTRVDT  |
| 24  | <i>Chroococcidiopsis thermalis</i> _  | TGAAPTVAEI | AKEKGILTVG | VVTRPFGFEG   | RRRANQAHQG | IDALKDRVDT  |
| 09  | <i>Cyanobacterium stanieri</i> _PCC_  | TGAAPIVAEV | AKEMGCLTVG | VVTRPFTFEG   | RRRTTQADDG | ISALQSRVDT  |
| 28  | <i>Synechocystis</i> _sp__PCC_6803_B  | TGAAPIVAEV | AKEMGCLTVG | IVTRPFTFEG   | RRRAKQAEEG | INALQSRVDT  |
| 15  | <i>Pleurocapsa</i> _sp__PCC_7327_Bac  | TGAAPIVAEV | AKEIGCLTVG | VVTRPFTFEG   | RRRNSHAEEG | VSNLQSRVDT  |
| 11  | <i>Cyanothece</i> _sp__PCC_7822_Bact  | TGAAPIVAEV | AKEMGCLTVG | VVTRPFTFEG   | RRRTNQAEDG | ISGLQSRVDT  |
| 13  | <i>Microcystis aeruginosa</i> _PCC_9  | TGAAPIVAEI | AKEIGCLTVG | VVTRPFTFEG   | RRRTNQADEG | VGGLQSRVDT  |
| 41  | <i>Leptolyngbya</i> _sp__PCC_7376_Ba  | TGAAPVVAEI | AKDLGCLTVG | VVTRPFKFEFEG | RRRTNQAEEG | ITALQSRVDT  |
| 22  | <i>Synechococcus</i> _sp__PCC_7502_B  | TGAAPVIAEI | AKEAGALTVG | IVTRPFTFEG   | RRRLQQAEEG | IDALQSRVDT  |
| 44  | <i>Raphidiopsis brookii</i> _D9_Bact  | TGAAPIVAEV | AKEMGALTVG | VVTRPFVFEFEG | RRRTSQAEEG | IEGLKSRVDT  |
| 18  | <i>Rivularia</i> _sp__PCC_7116_Bacte  | TGAASVVAEV | AKEMGALTVG | VVTRPFVFEFEG | RRRTTQAEEG | VEALKSRVDT  |
| 37  | <i>Fischerella</i> _sp__JSC-11_Bacte  | TGAAPIVAEV | AKEMGALTVG | VVTRPFIFEG   | RRRISQAEEG | IEGLKSRVDT  |
| 43  | <i>Calothrix</i> _sp__PCC_6303_Bacte  | TGAAPVVAEV | AKEMGALTVG | VVTRPFIFEG   | RRRISQSEEG | IEGLKSRVDT  |
| 31  | <i>Oscillatoriales cyanobacteri</i>   | TGAAPIVAEV | AKELGALTVG | IVTRPFTFEG   | RRRASQAEEG | IEALQSRVDT  |
| 45  | <i>Geitlerinema</i> _sp__PCC_7407_Ba  | TGAAPVVAEV | AKEAGALTVG | VVTRPFTFEG   | RRRTNQAEEG | TAALQGRVDT  |
| 17  | <i>Synechocystis</i> _sp__PCC_7509_B  | TGAAPIVAEI | AKEMGALTVG | VVTRPFIFEG   | RRRTSQAEEG | IEGLKSRVDT  |
| 26  | <i>Oscillatoria acuminata</i> _PCC_6  | TGAAPIVAEA | AKEVGALTVG | VVTRPFMFEG   | RRRTNQAEEG | IAALQSRVDT  |
| 16  | <i>Gloeocapsa</i> _sp__PCC_7428_Bact  | TGAAPIVAEV | AKELGALTVG | VVTRPFMFEG   | RRRTSQAEEG | IEALQSRVDT  |
| 19  | <i>Coleofasciculus chthonoplast</i>   | TGAAPIVAEI | AKEMGALTVG | VVTRPFTFEG   | RRRTSQAEEG | IAALQSRVDT  |
| 33  | <i>Chlamydomonas reinhardtii</i> _Eu  | SGAAPVVAQV | ARELGILTVG | IVTTPFTFEG   | RQRAQQARSA | LANLRAAVDT  |
| 50  | <i>Streptococcus lucimarinus</i> _CCE | SGAAPVVAQV | AKSAGILTVG | IVTMPFKFEFEG | RQRYNQAMEA | VERLRQNVDT  |
| 27  | <i>Ricinus communis</i> _Eukaryota_   | TGGAPVVAGI | SKSLGLLTVG | IVTTPFSFEG   | RKRTIQAQEG | IAALRNNVDT  |
| 35  | <i>Selaginella moellendorffii</i> _E  | SGAAPVIAGV | AKELGVLTVG | IVTTPFSFEG   | RRRSIQAQEA | TALLKNNVDT  |
| 42  | <i>Physcomitrella patens</i> _subsp_  | SGAAPIIAGV | AKQLGILTVG | IVTTPFAFEG   | RRRAVQAHEG | IAALKNNVDT  |
| 06  | <i>Thalassiosira pseudonana</i> _CCM  | SGAGPVVAEI | ARDEGCLTVG | VVTKPFAFEG   | KKRMQAEGA  | IKELRKHVDT  |
| 12  | <i>Phaeodactylum tricornutum</i> _CC  | SGAAPVLAKI | AKQDGCLTVG | VVTKPFAFEG   | RKRMMQAEAA | IEELRKNVDT  |
| 100 | <i>Ectocarpus siliculosus</i> _Loca   | TGAAPVIAEA | AKMGCVTVG  | VVTEPFGFEG   | RQRSRQAAAG | LAELREAADT  |
| 07  | <i>Thalassiosira pseudonana</i> _CCM  | SGAAPVVAEV | SKESGALTVG | IVTKPFAFEG   | RRRMRQATEA | IDRLRQNVDT  |
| 08  | <i>Phaeodactylum tricornutum</i> _CC  | SGAAPVVSEI | AKESGALTVG | IVTKPFAFEG   | RRRMRQATDA | IDRLRQHVDT  |

|                                |            |            |            |            |            |
|--------------------------------|------------|------------|------------|------------|------------|
| 05Thalassiosira_pseudonana_CCM | SGAAPVVAEV | SKEAGALTIG | IVTKPFRFEG | KRRMRQAVEA | IGRLRDHVDI |
| 14Phaeodactylum_tricornutum_CC | SGAAPVVAEV | AKEEGCLTVG | IVTKPFAFEG | KRRMKQAIAA | IERLRENVDT |
| 108Emiliana_huxleyi_Localdb__  | SGGAPIVAEA | AKAAGALTVG | VVTKPFSFEG | QRRMRQADAA | IDQLRQHVDA |
| 52Lotharella_amoeboformis_Euka | -----      | -----      | -----      | -----      | -----      |
| 53Lotharella_amoeboformis_Euka | -----      | -----      | -----      | -----      | -----      |
| 01QUERY_Bigel_39262            | SGAAPVVAEI | SKHTGCLTVG | VVTKPFHFEG | KKRLRQAREA | IQELRKHVDI |
| 55Cyanidioschyzon_merolae_Euka | SGAAPVVAEA | AREQGCLTVG | VVTKPFAFEG | RKRMNQALEA | IEALRESVDT |
| 096Aureococcus_anophagefferens | SGAAPIVASV | AKELGALTVG | VVTKPFGFEG | RKRAQQAQVA | TRNLQEAVDT |
| 04Cryptomonas_paramecium_Eukar | SGAAPVIAEI | AKELGCLTIA | VVTKPFVFEG | KKRMQQAIDG | IAELKNRVDT |
| 02Hemiselmis_andersenii_Eukary | SGAAPVVAEV | AKEMGCLTVG | VVTKPFGFEG | RRRMQQATDA | ITNLRERVDT |
| 03Guillardia_theta_Eukaryota__ | SGAAPIVAEV | AKEMGCLTVG | VVTKPFAFEG | KRRMQQANDA | ILNLRNKVDT |

## 151

|                                 |            |             |             |            |            |
|---------------------------------|------------|-------------|-------------|------------|------------|
| 54Cyanidioschyzon_merolae_Euka  | LIVVSNDRML | HVVPKNMPLK  | RAFRVADDVL  | KNGVRGISEL | ITRPGLINVD |
| 400Streococcus_tauri_Eukaryota  | LIVIPNDRLL | DVVEEGTPLQ  | EAFLLADDVL  | RQGVQGISDI | ITIPGLVNVD |
| 23Micromonas_sp__RCC299_Eukary  | LIVIPNDRLL | DVVMDDAPLQ  | EAFLLADDVL  | RQGVQGISDI | ITISGLVNVD |
| 34Volvox_carteri_f__nagariensi  | VIVIPNDRLL | DVASASTALQ  | DAFALADDVL  | RQGVQGISDI | ITVPGLINVD |
| 39Chlamydomonas_reinhardtii_Eu  | VIVIPNDRLL | DVAGASTALQ  | DAFALADDVL  | RQGVQGISDI | ITVPGLINVD |
| 36Brachypodium_distachyon_Euka  | LIVIPNDRLL | DVADENMPLQ  | DAFLLADDVL  | RQGVQGISDI | ITIPGLVNVD |
| 29Physcomitrella_patens_subsp__ | LIVIPNDRLL | DVSGDKTPLQ  | EAFSLADDVL  | RQGVQGISDI | ITTPGLVNVD |
| 30Selaginella_moellendorffii_E  | LIVIPNDRLL | DLVQEHTPLQ  | EAFLLADDVL  | RQGVQGISDI | ITIPGLVNVD |
| 47Prochlorococcus_marinus_subs  | LIVIPNDRLL | DVIAG-APLQ  | EAFRNADDVL  | RMGVKGISDI | ITCPGLVNVD |
| 51Synechococcus_sp__CC9311_Bac  | LIVIPNDRLL | DAIAG-APLQ  | EAFRSADDVL  | RMGVKGISDI | ITLPGLVNVD |
| 21Synechococcus_sp__JA-3-3Ab_B  | LIVIPNDKLL | SVISEQTPVH  | EAFRVADDVL  | RQGVQGISDI | ILIPGMINVD |
| 38Chamaesiphon_minutus_PCC_660  | LIIIPNDKLL | QAINSEQTPVQ | EAFRIADDVL  | RSGVQGISDI | ITIPGLINVD |
| 10Cyanotheca_sp__PCC_8802_Bact  | LIVIPNNQLL | QVIPPDTPPLQ | QAFLLADDVL  | RQGVQGISDI | ITIPGLVNVD |
| 20Stanieria_cyanosphaera_PCC_7  | LIVIPNNQLL | TVISPETPMQ  | EAFRIADDVL  | RQGVQGISDI | ITIPGLINVD |
| 32Gloeobacter_violaceus_PCC_74  | LIVIPNDKLL | SVISEQTPVQ  | EAFRIADDIL  | RQGVQGISDI | ITIPGLINVD |
| 25Gloeocapsa_sp__PCC_73106_Bac  | LIVIPNNQLL | SVINPDTPMQ  | EAFRTADDIL  | RQGVQGISDI | ITIPGLVNVD |
| 24Chroococcidiopsis_thermalis__ | MILIPNDKLL | SVISEQTALR  | DAFLTADDEVL | RQGVQGISDI | ITIPGLVNVD |
| 09Cyanobacterium_stanieri_PCC__ | LIVIPNNKLL | SVIPSDTPLQ  | ESFRIADDIL  | RQGVQGISDI | ITIPGLVNVD |
| 28Synechocystis_sp__PCC_6803_B  | LIVIPNNQLL | SVIPAETPLQ  | EAFRVADDIL  | RQGVQGISDI | IIIPGLVNVD |
| 15Pleurocapsa_sp__PCC_7327_Bac  | LIVIPNNQLL | AVANAETPMQ  | EAFRMADDIL  | RQGVQGISDI | ITIPGLINVD |
| 11Cyanotheca_sp__PCC_7822_Bact  | LIVIPNNQLL | AVIPQDTPLQ  | DAFRAADDIL  | RQGVQGISDI | ITIPGLVNVD |
| 13Microcystis_aeruginosa_PCC_9  | LIIIPNNQLL | QVIPADTPLQ  | EAFRVADDVL  | RQGVQGISDI | ITIPGLVNVD |
| 41Leptolyngbya_sp__PCC_7376_Ba  | LLVIPNNQLL | NVIAPETPMQ  | EAFRIADDIL  | RQGVQGISDI | ITIPGLVNVD |
| 22Synechococcus_sp__PCC_7502_B  | LIIIPNNKLL | SVTAEQTPIQ  | EAFRVADDIL  | RQGVQGISM  | ITIPGLVNVD |
| 44Raphidiopsis_brookii_D9_Bact  | LIIIPNNKLL | EVIPEQTPVQ  | EAFRYADDVL  | RQGVQGISDI | ITIPGLVNVD |
| 18Rivularia_sp__PCC_7116_Bacte  | LIIIPNNKLL | EVIPEQTPVQ  | EAFRYADDVL  | RQGVQGISDI | ITIPGLVNVD |
| 37Fischerella_sp__JSC-11_Bacte  | LIIIPNNKLL | EVIPEQTPMQ  | EAFRYADDVL  | RQGVQGISDI | ITIPGLINVD |

|                                 |            |            |            |            |             |
|---------------------------------|------------|------------|------------|------------|-------------|
| 43Calothrix_sp__PCC_6303_Bacte  | LIIIPNNKLL | EVIPEQTPMQ | EAFRYADDVL | RQGVQGISDI | ITIPGLINVD  |
| 31Oscillatoriales_cyanobacteri  | LIMIPNDKLL | SVISEQTPVQ | EAFRAADDIL | RQGVQGISDI | ITIRGLVNVD  |
| 45Geitlerinema_sp__PCC_7407_Ba  | LIIIPNDKLL | SVISEQTPVQ | EAFRVADDIL | RQGVQGISDI | ITIPGLVNVD  |
| 17Synechocystis_sp__PCC_7509_B  | LIVIPNDKLL | SVISEQTPVQ | EAFRFADDIL | RQGVQGISDI | ITIPGLVNVD  |
| 26Oscillatoria_acuminata_PCC_6  | LIVIPNDKLL | SVISEQTPVQ | EAFRVADDIL | RQGVQGISDI | ITIPGLVNVD  |
| 16Gloeocapsa_sp__PCC_7428_Bact  | LIVIPNDKLL | SVISEQTPVQ | EAFRIADDIL | RQGVQGISDI | ITIPGLVNVD  |
| 19Coleofasciculus_chthonoplast  | LIVIPNNKLL | SVISEQTPVQ | DAFRVADDIL | RQGVQGISDI | ITVPGLVNVD  |
| 33Chlamydomonas_reinhardtii_Eu  | LIVIPNDRLL | SAMDSNVPIK | DAFKIADDVL | RQGVKGISEI | ITVPGLVNVD  |
| 50Streptococcus_lucimarinus_CCE | LIVIPNDRLL | AAVDASLPVQ | DAFLVADDIL | RQGVVGI    | ITLPLINVD   |
| 27Ricinus_communis_Eukaryota__  | LIVIPNDKLL | AAVSPSTPVT | EAFNLADDIL | RQGVVGI    | ITIPGLVNVD  |
| 35Selaginella_moellendorffii_E  | LITIPNDKLL | TAVSQSTPVT | EAFNLADDIL | RQGVVGI    | ITIPGLVNVD  |
| 42Physcomitrella_patens_subsp__ | LITIPNNKLL | TAVAQSTPVT | EAFNLADDIL | RQGVVGI    | ITVPGLVNVD  |
| 06Thalassiosira_pseudonana_CCM  | LIVVSNKLL  | RIVPENTPVT | DAFLVADDIL | RQGVVGI    | I IKTGLVNVD |
| 12Phaeodactylum_tricornutum_CC  | LIVVSNKLL  | RIVPDNTPVT | EAFVADDIL  | RQGVVGI    | ILKTGLVNVD  |
| 100Ectocarpus_siliculosus_Loca  | VLVVANDKLL | EIVPGRMTMK | DAFLVADDVL | RQGVIGTSEL | IVRPGLINVD  |
| 07Thalassiosira_pseudonana_CCM  | VIIIVSNKLL | DIIPENTPLE | ASFRVADDIL | RQGVVGI    | IVRPGLINVD  |
| 08Phaeodactylum_tricornutum_CC  | VIIIVSNKLL | EIIPDDTPVT | AAFRVADDIL | RQGVVGI    | IVRPGLINVD  |
| 05Thalassiosira_pseudonana_CCM  | VIVVSNDRLL | DIIPEDTPMN | RAFAVADDIL | RQGVVGI    | IVKPGLINVD  |
| 14Phaeodactylum_tricornutum_CC  | VIVVSNDRLL | EIIPDDTPME | RAFAVADDIL | RQGVVGI    | IVKPGLINVD  |
| 108Emiliana_huxleyi_Localdb__   | MIVVSNDRLL | DLVEEGTPLQ | EAFVADDIL  | RQGVVGI    | IIQPGLINVD  |
| 52Lotharella_amoeboformis_Euka  | -----      | -----      | -----      | -----      | -----LINVD  |
| 53Lotharella_amoeboformis_Euka  | -----      | -----      | -----DDIL  | RQGIVGISEI | ITKPGLINVD  |
| 01QUERY_Bigel_39262             | LIVVSNKLL  | EVAPTGMALQ | DAFAQADDIL | RQGIVGISEI | ITKPGLINVD  |
| 55Cyanidioschyzon_merolae_Euka  | LIVVSNKLL  | QIVPENTPLQ | DAFRVADDIL | RQGVVGI    | IIRPGLINVD  |
| 096Aureococcus_anophagefferens  | LIVISNDRLL | QIVPEGTME  | GAFVADDIL  | RQGVVGI    | IIKPGLINVD  |
| 04Cryptomonas_paramecium_Eukar  | LIVVSNKLL  | KIIPENTPLQ | DAFSVADDVL | RQGVVGI    | IIKPGLINVD  |
| 02Hemiselmis_andersenii_Eukary  | LIVVSNKLL  | QIVPDNTPVQ | DAFSVADDIL | RQGVVGI    | IVRPGLINVD  |
| 03Guillardia_theta_Eukaryota__  | LIVVSNKLL  | QIVPDNTPVQ | DAFSVADDIL | RQGVVGI    | IVRPGLINVD  |

201

|                                  |            |            |            |            |            |
|----------------------------------|------------|------------|------------|------------|------------|
| 54Cyanidioschyzon_merolae_Euka   | FADVRSVMAE | KGYALLGLGT | GSGERRAKEA | ALAAVSSPLL | DFPLNSAKGA |
| 400Streptococcus_tauri_Eukaryota | FADVRTVMKD | SGTAMLVGVV | ASGKNRAEEA | ARAAMSAPLV | EHSIDRAMGI |
| 23Micromonas_sp__RCC299_Eukary   | FADVKAVMKG | SGTAMLVGVV | AQGKNRAEEA | ATAAISAPLI | EHSIDRATGI |
| 34Volvox_carteri_f__nagariensi   | FADVKAIMSN | SGTAMLVGVA | ASGPDRAEQA | AMAATSAPLI | QRSIEKATGI |
| 39Chlamydomonas_reinhardtii_Eu   | FADVKAIMSN | SGTAMLVGVA | ASGPDRAEQA | AVAATSAPLI | QRSIEKATGI |
| 36Brachypodium_distachyon_Euka   | FADVKAVMKN | SGTAMLVGVV | SSSKNRAQEA | AEQATLAPLI | GSSIEAATGV |
| 29Physcomitrella_patens_subsp__  | FADVRAVMSN | SGTAMLVGVS | SSGKNRAEEA | AIQAASAPLI | ERSIEQATGI |
| 30Selaginella_moellendorffii_E   | FADVKAIMTN | SGTAMLVGVT | ASGKNRAEEA | AQQATSAPLI | ERSIERATGV |
| 47Prochlorococcus_marinus_subs   | FADVRSVMTE | AGTALLGIGI | GSGRSRALEA | AQAAMNSPLL | EAAIDGAKGC |
| 51Synechococcus_sp__CC9311_Bac   | FADVRSVMTE | AGTALLGIGV | GSGRSRAVEA | AQTAINSPPL | EAAIDGASGC |

|     |                                       |             |            |             |             |            |
|-----|---------------------------------------|-------------|------------|-------------|-------------|------------|
| 21  | <i>Synechococcus</i> _sp__JA-3-3Ab_B  | FADVRSVMAD  | AGTALMGIGM | GSGKSRAREA  | AITAVSSPLL  | ETSIEGAKGV |
| 38  | <i>Chamaesiphon</i> _minutus_PCC_660  | FADVRTVMAD  | AGSALMGIGE | GSGKSRAREA  | AVQAINSPLL  | ESSIEGARGV |
| 10  | <i>Cyanothece</i> _sp__PCC_8802_Bact  | FADVRAVMAD  | AGSALMGLGI | GSGKSRASDA  | AVAAISSPLL  | EHSIKGARGV |
| 20  | <i>Stanieria</i> _cyanosphaera_PCC_7  | FADVRAIMAD  | AGSALMGIGI | GSGKSRAREA  | AIAAVSSPLL  | EASIEGAKGV |
| 32  | <i>Gloeobacter</i> _violaceus_PCC_74  | FADVRAIMAD  | AGSALMGIGM | GSGKSRAREA  | AMTAISSPLL  | ESSIEGANGV |
| 25  | <i>Gloeocapsa</i> _sp__PCC_73106_Bac  | FADVRAIMAD  | AGSALMGIGI | GTGKSRAKEG  | AIAAISSPLL  | ESSIEGAKGV |
| 24  | <i>Chroococcidiopsis</i> _thermalis_  | FADVKAVMAD  | AGSALMGIGT | GSGKTRAREA  | ANAAISSPLL  | ESSIEGAKGV |
| 09  | <i>Cyanobacterium</i> _stanieri_PCC_  | FADVRAVMAD  | AGSALMGIGI | GSGKSRARES  | AVAAISSPLI  | ESSIQGAKGV |
| 28  | <i>Synechocystis</i> _sp__PCC_6803_B  | FADVRAVMAD  | AGSALMGIGV | GSGKSRAREA  | ATAAISSPLL  | ESSIQGAKGV |
| 15  | <i>Pleurocapsa</i> _sp__PCC_7327_Bac  | FADVRAIMAD  | AGSALMGIGI | GTGKSRAKEG  | AIAAISSPLL  | ESSIEGAKGV |
| 11  | <i>Cyanothece</i> _sp__PCC_7822_Bact  | FADVRAVMAD  | AGSALMGIGV | GSGKSRAKEG  | AIAAISSPLL  | EHSIEGAKGV |
| 13  | <i>Microcystis</i> _aeruginosa_PCC_9  | FADVRAVMAD  | AGSALMGIGI | GSGKSRAKEG  | AIAAISSPLL  | ESSIEGAKGV |
| 41  | <i>Leptolyngbya</i> _sp__PCC_7376_Ba  | FADVRAVMAD  | AGSALMGIGV | GSGKSRAREA  | AIAAISSPLM  | ESSVEGAKGV |
| 22  | <i>Synechococcus</i> _sp__PCC_7502_B  | FADIRAVMAD  | AGSALLGIGI | GSGKSRAREA  | AMTAISSPLL  | ESSIEGANGV |
| 44  | <i>Raphidiopsis</i> _brookii_D9_Bact  | FADVRAVMAD  | AGSALMGIGV | SSGKSRAREA  | AIAAISSPLL  | ESSIEGARGV |
| 18  | <i>Rivularia</i> _sp__PCC_7116_Bacte  | FADVRAVMAD  | AGSALMGIGI | GSGKSRAREA  | AIAAISSPLL  | ECSIEGARGV |
| 37  | <i>Fischerella</i> _sp__JSC-11_Bacte  | FADVRAVMAD  | AGSALMGIGI | GSGKSRAREA  | AIAAISSPLL  | ECSIEGARGV |
| 43  | <i>Calothrix</i> _sp__PCC_6303_Bacte  | FADVRAVMAD  | AGSALMGIGI | GSGKSRAREA  | AIAAISSPLL  | ECSIEGARGV |
| 31  | <i>Oscillatoriales</i> _cyanobacteri  | FADVRAVMAD  | AGSALMGIGV | GTGKSRAAREA | AVASSISSPLL | ESSIDGARGV |
| 45  | <i>Geitlerinema</i> _sp__PCC_7407_Ba  | FADVRAVMAD  | AGSALMGIGV | GSGKSRAREA  | AMAAIASPLL  | ESSIDGAKGV |
| 17  | <i>Synechocystis</i> _sp__PCC_7509_B  | FADVRAIMAD  | AGSALMGIGV | GSGKSRAREA  | ANAAISSPLL  | ESSIEGARGV |
| 26  | <i>Oscillatoria</i> _acuminata_PCC_6  | FADVRAVMAD  | AGSALMGIGV | GSGKSRAREA  | ALSAISSPLL  | ESSIEGAKGV |
| 16  | <i>Gloeocapsa</i> _sp__PCC_7428_Bact  | FADVRAIMAD  | AGSALMGIGI | GSGKSRAREA  | ANAAISSPLL  | ESSIEGAKGV |
| 19  | <i>Coleofasciculus</i> _chthonoplast  | FADVRAVMAD  | AGSALMGIGV | GSGKSRAREA  | AVAAISSPLL  | ESSVEGARGV |
| 33  | <i>Chlamydomonas</i> _reinhardtii_Eu  | FADVRAIMAG  | AGSSLMGQGY | GSGPRRASDA  | ALRAISSPLL  | EVGIERATGV |
| 50  | <i>Streptococcus</i> _lucimarinus_CCE | FADVRAVMAD  | AGSSLMGIGR | ASGKNRAREA  | AEEAISSPLL  | DLGIDRATGI |
| 27  | <i>Ricinus</i> _communis_Eukaryota__  | FADVQAIMKD  | SGSSLMGIGT | ATGKSRRARDA | ALNAIQSPLL  | DIGIERATGV |
| 35  | <i>Selaginella</i> _moellendorffii_E  | FADVRAIMAN  | AGSSLMGIGT | ATGKSRRARDA | ALNAIQSPLL  | DVGIERATGI |
| 42  | <i>Physcomitrella</i> _patens_subsp_  | FADVRAIMAN  | AGSSLMGIGT | ATGKSRRAREA | ALSAIQSPLL  | DVGIERATGI |
| 06  | <i>Thalassiosira</i> _pseudonana_CCM  | FADVRAVMKD  | AGTALMGVGT | GVGKTRATDA  | AVAAISSPLL  | DFPISEAKRI |
| 12  | <i>Phaeodactylum</i> _tricornutum_CC  | FADVRAVMKD  | AGTALMGVGT | GVGKNRASDA  | ALAAISSPLL  | DFPIQRAKRI |
| 100 | <i>Ectocarpus</i> _siliculosus_Loca   | FADVVRQVITN | SGTALIGIGM | GSGKTRAEDA  | AVGAIVSPLL  | EFSIDQAAGV |
| 07  | <i>Thalassiosira</i> _pseudonana_CCM  | FADVRSVMQD  | AGTALMGIGT | GSGKTSAEDA  | AVAAISSPLL  | DAPVDEATGV |
| 08  | <i>Phaeodactylum</i> _tricornutum_CC  | FADVRSVMKD  | AGSALMGIGT | GVGKTSAEDA  | AIAAISSPLL  | DEPVQDATGV |
| 05  | <i>Thalassiosira</i> _pseudonana_CCM  | FADVRSVMSD  | AGTALMGIGI | GSGKTAEDA   | ATAAISSPLL  | DSSIDNAKGV |
| 14  | <i>Phaeodactylum</i> _tricornutum_CC  | FADVRSIMSG  | AGTALMGIGI | GAGKTAEDA   | AAAAISSPLL  | DSTIENAKGV |
| 108 | <i>Emiliana</i> _huxleyi_Localdb__    | FADVQSVMGA  | SGLALMGIGT | AEGKTRARDA  | AFAA---PLI  | DFPIGQATGI |
| 52  | <i>Lotharella</i> _amoeboformis_Euka  | FADVRSVMQN  | AGLALMGIGR | GSGKNRAQDA  | ALAAVTSPLL  | DFPIQQAAGV |
| 53  | <i>Lotharella</i> _amoeboformis_Euka  | FADVNSIMSN  | AGLALMGIGE | GAGPSRRARDA | ALAAITSPLL  | DFPLRDAKGV |
| 01  | QUERY_Bigel_39262                     | FADVNSVMSN  | AGLALMGIGV | GSGPSRAQDA  | AMAAITSPLL  | DFPLENAKGV |

|                                |            |            |             |            |            |
|--------------------------------|------------|------------|-------------|------------|------------|
| 55Cyanidioschyzon_merolae_Euka | FADVRSVMAH | AGSALMGIGT | GSGKSTRAHDA | AVAAISSPLL | DFPIERAKGI |
| 096Aureococcus_anophagefferens | FADVRSIMSD | AGTALMGIGQ | SKGKDRAAEA  | AGLATSCPLL | DSQFMNAKAV |
| 04Cryptomonas_paramecium_Eukar | FADIRSIMAE | SGNALMGIGT | ASGKNRAHDA  | SIAAISSPLL | DFSIKDAKGI |
| 02Hemiselmis_andersenii_Eukary | FADVRSVMAD | AGSALMGIGT | GSGKTRAQDA  | AVAAISSPLL | DFPIEKAKGI |
| 03Guillardia_theta_Eukaryota__ | FADVRSVMAD | AGSALMGIGT | GSGKTRAQDA  | AVAAISSPLL | DFPIEKARGI |

## 251

|                                 |             |            |            |            |            |
|---------------------------------|-------------|------------|------------|------------|------------|
| 54Cyanidioschyzon_merolae_Euka  | VFNICGGPDM  | TLSEVNQCAE | VIFQHLDPDA | SIIFGATVDP | TLPRDISVTV |
| 400streococcus_tauri_Eukaryota  | VFNITGGPDM  | TLMEVNAVSE | VVTSLADPNA | NVIFGSVDE  | KHRGEIAVTI |
| 23Micromonas_sp__RCC299_Eukary  | VYNITGGSDDL | TLQEINTVSE | VITSLADPAA | NIIFGAVVDD | QYKGELQVTV |
| 34Volvox_carteri_f__nagariensi  | VYNITGGRDL  | TLAEVNRVSE | VVTALADPSC | NIIFGAVVDE | QYDGELHVTI |
| 39Chlamydomonas_reinhardtii_Eu  | VYNITGGRDL  | TLAEVNRVSE | VVTALADPSC | NIIFGAVVDE | QYDGELHVTI |
| 36Brachypodium_distachyon_Euka  | VYNITGGKDI  | TLQEVNKVSQ | IVTSLADPSA | NIIFGAVVDD | RYTGEIHVTI |
| 29Physcomitrella_patens_subsp__ | VYNITGGSDDL | TLQEVNTVSQ | IVTGLADPSA | NIIFGAVVDD | KYTGEVHVTI |
| 30Selaginella_moellendorffii_E  | VYNITGGRDL  | TLQEVNRVSQ | VVTGLADPAA | NIIFGAVVDE | RYDGQVHVTI |
| 47Prochlorococcus_marinus_subs  | VINITGGKDM  | TLEDMTSASE | IIYDVVDPEA | NIIVGAVIDE | SMEGEIQVTV |
| 51Synechococcus_sp__CC9311_Bac  | VINISGGRDM  | TLEDMTTASE | VIYDVVDPEA | NIIVGAVVDE | RLEGEIHVTV |
| 21Synechococcus_sp__JA-3-3Ab_B  | LFNITGGDL   | SLHEVTAAE  | IIAEAVDPEA | NIIFGTVQDE | RMQGEVRITV |
| 38Chamaesiphon_minutus_PCC_660  | VLNITGGSDM  | TLIEVSTAAD | TIYEVDPNA  | NIIFGAVIDP | QMKGEMRITV |
| 10Cyanothecce_sp__PCC_8802_Bact | VFNITGGDDL  | TLHEVNAAE  | TIFEVDPDA  | NIIFGAVIDP | TLQGEVIITV |
| 20Stanieria_cyanosphaera_PCC_7  | VINITGGTDL  | SLHEVNAAA  | SIYDVDPDA  | NIIFGAVIDE | RMQGEVCITV |
| 32Gloeobacter_violaceus_PCC_74  | VLNVTGGHDL  | TLHEVNAAA  | VIYEVDPNA  | NIIFGAVIDE | KLQGELRITV |
| 25Gloeocapsa_sp__PCC_73106_Bac  | VLNITGGKDL  | TLHEVNAAA  | IIYEIVDPNA | NIIFGAVIDP | EMQGEIRVTV |
| 24Chroococcidiopsis_thermalis__ | VINITGGSDM  | TLHEVNMAAD | TIYEVDPNA  | NIIFGAVIDD | KLQGEMKITV |
| 09Cyanobacterium_stanieri_PCC__ | VLNITGGNDL  | TLHEVNTVAE | TIYDIVDPNA | NIIFGAVIDE | SMQGEIRITV |
| 28Synechocystis_sp__PCC_6803_B  | VFNVTGGTDL  | TLHEVNAAA  | IIYEVDPNA  | NIIFGAVIDD | RLQGEMRITV |
| 15Pleurocapsa_sp__PCC_7327_Bac  | ILNITGGHDL  | TLHEVNAAA  | IIYEIVDPNA | NIIFGAVIDE | KMQGEIRITA |
| 11Cyanothecce_sp__PCC_7822_Bact | VLNITGGSDL  | TLHEVNAAE  | TIYEVDPNA  | NIIFGAVIDE | KMQGEILITV |
| 13Microcystis_aeruginosa_PCC_9  | VFNITGGQDL  | TLHEVNAAA  | IIYEVDPNA  | NIIFGAVIDE | KMQGEVRITV |
| 41Leptolyngbya_sp__PCC_7376_Ba  | VLNITGGHDL  | TLHEVNAAA  | AIYEVDPNA  | NIIFGAVIDE | QLQGEIRITV |
| 22Synechococcus_sp__PCC_7502_B  | VFNITGGSDL  | TLHEVNAAA  | IIYEVDPNA  | NIIFGAVIDE | KMAGEVRITV |
| 44Raphidiopsis_brookii_D9_Bact  | VFNITGGSDL  | TLHEVNAAA  | TIYEVDPNA  | NIIFGAVIDD | RLQGEVRITV |
| 18Rivularia_sp__PCC_7116_Bacte  | VFNITGGSDL  | TLHEVNAAA  | AIYEVDPNA  | NIIFGAVIDD | RLEGEVRITV |
| 37Fischerella_sp__JSC-11_Bacte  | VFNITGGSDL  | TLHEVNAAA  | TIYEVDPNA  | NIIFGAVIDD | RLQGEVRLTV |
| 43Calothrix_sp__PCC_6303_Bacte  | VFNITGGSDL  | TLHEVNAAA  | TIYEVDPNA  | NIIFGAVIDD | RLQGEVRLTV |
| 31Oscillatoriales_cyanobacteri  | VFNITGGTDL  | TLHEVNAAA  | IIYEVDPNA  | NIIFGAVIDE | RLQGELRITV |
| 45Geitlerinema_sp__PCC_7407_Ba  | VFNITGGHDL  | TLHEVNSAAE | IIYEVDPNA  | NIIFGAVIDE | RMQGEIRITV |
| 17Synechocystis_sp__PCC_7509_B  | IFNITGGSDL  | TLHEVNAAA  | IIYEVDPNA  | NIIFGAVIDE | RLQGEVRITV |
| 26Oscillatoria_acuminata_PCC_6  | VLNITGGTDL  | TLHEVNAAA  | TVYEVDPNA  | NIIFGAVIDE | RLQGEIRITV |
| 16Gloeocapsa_sp__PCC_7428_Bact  | VFNITGGHDL  | TLHEVNAAA  | TIYEVDPNA  | NIIFGAVIDE | KLQGEIRITV |

19Coleofasciculus\_chthonoplast VFNITGGSDL TLHEVNAAAEE TIYEVVDPNA NIIFGAVIDD RLQGEIRITV  
 33Chlamydomonas\_reinhardtii\_Eu VWNITGPPNM TLHEVNEAAE IIYDMVDPNA NLIFGAVVDS TLDDTVSITI  
 500Streococcus\_lucimarinus\_CCE VWNITGGSDL TLHEVNEAAE VIYDLVDPSA LIIFGAVVKD ATDGEVSITL  
 27Ricinus\_communis\_Eukaryota\_\_ VWNITGGSDL KLFEVNAAAEE VIYDLVDPSA NLIFGAVIDQ SLSGQVSITL  
 35Selaginella\_moellendorffii\_E VWNITGGTDM TLFEVNAAAEE VIYDLVDPSA NLIFGAVVDD SFNGHVSITL  
 42Physcomitrella\_patens\_subsp\_ VWNITGGSDM TLFEVNAAAEE VIYDLVDPSA NLIFGAVVDE ALHGQVSITL  
 06Thalassiosira\_pseudonana\_CCM VFNVVGGPGL GLSEINAASE VIYENAHEDA NIIFGALIDP DMGEEVSITV  
 12Phaeodactylum\_tricornutum\_CC VFNIVGGADM GLQEINEASE VIYENADDNA NIIFGALVDP QMDGQISITV  
 100Ectocarpus\_siliculosus\_Loca IFNIVGGADM SLTEVNAAAAS IIQRNVHPDA NIIIGALVDE RCGKEVSVTV  
 07Thalassiosira\_pseudonana\_CCM VFNIIGGESL SLQEVDRAAK VIYNNVHEDA NVIFGALVDD EITDTSITV  
 08Phaeodactylum\_tricornutum\_CC VFNILGPRNL SLQEVNRAAR VIYDNVHEDA NVIFGALVDD DIEDEVSITV  
 05Thalassiosira\_pseudonana\_CCM VFNISGGEGGL SLTDVNRAAR LIYDSVEEDA NVIFGALIDE SLEDSISITV  
 14Phaeodactylum\_tricornutum\_CC VFNISGGQNL SLNEVNQAAK LIYSTVEADA NVIFGALVDD TLEDNISITV  
 108Emiliana\_huxleyi\_Localdb\_\_ VFTITGSSDM TLQEVNAAAEE AIYEMADPDA NIIFGAQIDD SMGNVLSITV  
 52Lotharella\_amoeboformis\_Euka VYTVTGNKDM SLTEVAQVSN VIQKMGVDPDA NVIFGALIDE NMGDEMSVIV  
 53Lotharella\_amoeboformis\_Euka VYTITGGPDM SLTEVNRVAE VIAEMVHPAA NVIFGANTDE SMGDKMKVVV  
 01QUERY\_Bigel\_39262 VYTINGGPD M SLQEVNRVAE VIAEMVHPEA NVIFGASTDE SMGNSNK---  
 55Cyanidioschyzon\_merolae\_Euka VFNVTTGGEDM TLHEINQAAE VIYEAVDPNA NIIFGALIDQ QMESEISITV  
 096Aureococcus\_anophagefferens VFNICGPPDL TLAEVNSAAG VIYENVAPDA NIIFGASVDE NMGQDVSVTV  
 04Cryptomonas\_paramecium\_Eukar IFSIVGGHTM TLHEINTAAE IIYQAVDSNA NIIFGALVDD GMEDKISITV  
 02Hemiselmis\_andersenii\_Eukary VFNITGGHDM TLHEINSAAE VIYEAVDPNA NIIFGALVDE NMENEISITV  
 03Guillardia\_theta\_Eukaryota\_\_ VFNITGGQDM TLHEINSAAE VIYEAVDSNA NIIFGALVDD NMENEISITV

## 301

54Cyanidioschyzon\_merolae\_Euka VATGF----- --  
 400Streococcus\_tauri\_Eukaryota VATGFWNRGF LG  
 23Micromonas\_sp\_\_RCC299\_Eukary IATGFWQRSF LD  
 34Volvox\_carteri\_f\_\_nagariensi IATGFWSADF LG  
 39Chlamydomonas\_reinhardtii\_Eu IATGFWSADF LG  
 36Brachypodium\_distachyon\_Euka IATGFWSS-- --  
 29Physcomitrella\_patens\_subsp\_ IATGFLFNGF L-  
 30Selaginella\_moellendorffii\_E IATGFRFR-- --  
 47Prochlorococcus\_marinus\_subs IATGFNKNEF LR  
 51Synechococcus\_sp\_\_CC9311\_Bac IATGFAPRDF LR  
 21Synechococcus\_sp\_\_JA-3-3Ab\_B IATGFSGDEF LR  
 38Chamaesiphon\_minutus\_PCC\_660 IATGFNPDAF LQ  
 10Cyanothecce\_sp\_\_PCC\_8802\_Bact IATGFSTDDF LQ  
 20Stanieria\_cyanosphaera\_PCC\_7 IATGFQIDDF LQ  
 32Gloeobacter\_violaceus\_PCC\_74 IATGFEDDEF LR  
 25Gloeocapsa\_sp\_\_PCC\_73106\_Bac IATGFSSDEF LQ

|     |                                      |            |    |
|-----|--------------------------------------|------------|----|
| 24  | <i>Chroococcidiopsis thermalis</i> _ | IATGFKPDEF | LQ |
| 09  | <i>Cyanobacterium stanieri</i> _PCC_ | IATGFLADEF | LQ |
| 28  | <i>Synechocystis</i> _sp__PCC_6803_B | IATGFAPDDF | LQ |
| 15  | <i>Pleurocapsa</i> _sp__PCC_7327_Bac | IATGFKPDDF | LQ |
| 11  | <i>Cyanothece</i> _sp__PCC_7822_Bact | IATGFKPDDF | LQ |
| 13  | <i>Microcystis aeruginosa</i> _PCC_9 | IATGFKPDDF | LQ |
| 41  | <i>Leptolyngbya</i> _sp__PCC_7376_Ba | IATGFRPDEF | LQ |
| 22  | <i>Synechococcus</i> _sp__PCC_7502_B | IATGFKPDDF | LQ |
| 44  | <i>Raphidiopsis brookii</i> _D9_Bact | IATGFAPQDF | LQ |
| 18  | <i>Rivularia</i> _sp__PCC_7116_Bacte | IATGFKPEPF | LQ |
| 37  | <i>Fischerella</i> _sp__JSC-11_Bacte | IATGFGSDDF | LR |
| 43  | <i>Calothrix</i> _sp__PCC_6303_Bacte | IATGFKPDDF | LR |
| 31  | <i>Scillatoriales cyanobacteri</i>   | IATGFGDDDF | LR |
| 45  | <i>Geitlerinema</i> _sp__PCC_7407_Ba | IATGFVGDEF | LQ |
| 17  | <i>Synechocystis</i> _sp__PCC_7509_B | IATGFKTDDF | LQ |
| 26  | <i>Scillatoria acuminata</i> _PCC_6  | IATGFPPDDF | LQ |
| 16  | <i>Gloeocapsa</i> _sp__PCC_7428_Bact | IATGFKPDEF | LQ |
| 19  | <i>Coleofasciculus chthonoplast</i>  | IATGFRPDEF | LQ |
| 33  | <i>Chlamydomonas reinhardtii</i> _Eu | IATGFGAEAF | LR |
| 50  | <i>Streococcus lucimarinus</i> _CCE  | IATGFGKESF | LR |
| 27  | <i>Ricinus communis</i> _Eukaryota__ | IATGFGSEKF | LR |
| 35  | <i>Selaginella moellendorffii</i> _E | IATGFNNESF | LR |
| 42  | <i>Physcomitrella patens</i> _subsp_ | IATGFSNNSF | LR |
| 06  | <i>Thalassiosira pseudonana</i> _CCM | LACDFVETGF | FK |
| 12  | <i>Phaeodactylum tricornutum</i> _CC | LACDFADSNF | LK |
| 100 | <i>Ectocarpus siliculosus</i> _Loca  | LATGF----- | -- |
| 07  | <i>Thalassiosira pseudonana</i> _CCM | LATGFKYGDF | LR |
| 08  | <i>Phaeodactylum tricornutum</i> _CC | LATGFRGADF | LS |
| 05  | <i>Thalassiosira pseudonana</i> _CCM | LATGFEAESF | LR |
| 14  | <i>Phaeodactylum tricornutum</i> _CC | LATGFPLDSF | LK |
| 108 | <i>Emiliana huxleyi</i> _Localdb__   | VAMFL----- | -- |
| 52  | <i>Lotharella amoeboformis</i> _Euka | VATNFAKMAL | GR |
| 53  | <i>Lotharella amoeboformis</i> _Euka | VATNFNNQEE | ED |
| 01  | QUERY_Bigel_39262                    | -----      | -- |
| 55  | <i>Cyanidioschyzon merolae</i> _Euka | VATGFPGGDF | LR |
| 096 | <i>Aureococcus anophagefferens</i>   | LATGF----- | FG |
| 04  | <i>Cryptomonas paramecium</i> _Eukar | IATGF----- | -K |
| 02  | <i>Hemiselmis andersenii</i> _Eukary | VATGF---DF | WG |
| 03  | <i>Guillardia theta</i> _Eukaryota__ | VATGF---DL | WK |





## Alignment: HP

|                                |            |             |            |            |            |     |
|--------------------------------|------------|-------------|------------|------------|------------|-----|
| 01QUERY_Bigel_hp_88555         | WELDVYSRPV | VN-GGKKLWE  | FMLCDATGRW | KYLESLSPDE | VNSKGIKKIL | LN  |
| 62Lotharella_amoeboformis_Euka | -----      | -----       | -----      | -----      | -----      | --- |
| 08Guillardia_theta_Eukaryota__ | WELDFFSRPV | ILDDGKKLWE  | LIIVNKDKSL | QIIESVPNNM | VNSKELRRKL | LN  |
| 11Hemiselmis_andersenii_Eukary | WELDFFSRPV | VDENGKKLWE  | IIIVDQKGNF | EHIETVPNNL | VNSKELKKRI | KI  |
| 64Cyanidioschyzon_merolae_Euka | WELDFYSRPV | VGADGKRLWE  | LVVCDRDGSF | VHVEAFPNNM | VNSRELARAV | KT  |
| 093Aureococcus_anophagefferens | WELDCFSRPV | L-VKGGKLWE  | LLITDASGQW | RDVVALPATG | VNSVAVRKAI | ED  |
| 095Ectocarpus_siliculosus_Loca | WELDVYSRPV | VGADGKKLWE  | LLICDSTGNF | RHVSPIPSNM | VNSREVRRTI | EG  |
| 02Phaeodactylum_tricornutum_CC | WELDCYSRPV | -AVAGKKLWE  | VLITDSAGSF | RFRQTLPSNQ | VNSKTLRQIV | DD  |
| 03Thalassiosira_pseudonana_CCM | WELDCYSRPV | LVDGKKKLWE  | ILMTDSSGNM | KVCRALPSNK | VNSREVRRVV | EE  |
| 63Calliarthron_tuberculosis_Eu | WELDFYSRPV | IGLDGKKLWE  | LIITDTTGAF | EHVEAIPNSL | VNSRDLKKRI | SA  |
| 67Porphyridium_cruentum_Eukary | WELDFYSRPV | LGEDGKKIWE  | LLITDKDGLV | EHVEQVPSSS | VNSTELRKRK | AA  |
| 115Pyropia_yezoensis_Localdb__ | WELDFYSRPV | YGS DGKKRWE | LLITDKNGVW | SHVEVFANAD | VNSANLRSRV | AA  |
| 09Leptolyngbya_sp_PCC_6406_Ba  | WELDFYSRPI | LDERNKRRWE  | VLISEGLQRF | RFSQFLANTD | VNSLKLKEVI | ET  |
| 050scillatoriales_cyanobacteri | WELDFYSRPI | LDEHGKKVWE  | VVLCESPTQF | RFAEYCASTE | VNSERLVQAL | QT  |
| 040scillatoria_acuminata_PCC_6 | WELDFYSKPI | LDENGKKRWE  | VLICESPTDL | RFSKYCSSSE | VNSIWLGNAI | NE  |
| 38Gloeocapsa_sp_PCC_73106_Bac  | WELDFYSRPI | LDENQKKLWE  | VLICESPQQY | KYAQFCPSTS | VNSLWLAEAI | KQ  |
| 06Synechocystis_sp_PCC_7509_B  | WEIDFYSRPV | LDENKKKLWE  | ILVCESPLSF | KYSEYCSSSQ | VNSAWLKAAL | EK  |
| 17Gloeocapsa_sp_PCC_7428_Bact  | WEIDFYSRPI | LDENQKKIWE  | VLVCESLTFD | RFAYKCPSTQ | VNSVWLRTAL | EE  |
| 14Chroococciopsis_thermalis__  | WEIDFYSRPI | LDENQKKVWE  | VVVCESPLDF | RYAQYCPSTQ | VNSAWLRTAL | QE  |
| 20Calothrix_sp_PCC_6303_Bacte  | WELDFYSRPI | LDENQKKVWE  | LLICESPKDF | RYAQYCPSTE | VNSAWLRTAI | QE  |
| 21Rivularia_sp_PCC_7116_Bacte  | WELDYYSRPI | LDENKKKVWE  | VLICETPLDF | RYAKYCSSAT | VNSVWLQTAL | QE  |
| 27Nostoc_sp_PCC_7107_Bacteria  | WEIDFYSRPI | LDENQKKVWE  | VVVCESPLDF | RYAQYCPSTE | VNSGWLRTAL | QE  |
| 16Cylindrospermopsis_raciborsk | WELDFYSRPI | LDANQKKVWE  | VLICESPTDF | RYAQYCPSTQ | VNSVWLRTAL | QE  |
| 29Fischerella_sp_JSC-11_Bacte  | WELDFYSRPI | LDENQKKVWE  | VLVCESPLDF | RYAQYCPSTQ | VNSVWLRTAL | QE  |
| 10Cyanobacterium_aponinum_PCC_ | WELDFYSRPI | IDENKKKRWE  | ILICESPTTF | RYSQFCANTE | VNSITLQNAI | AT  |
| 24Halotheca_sp_PCC_7418_Bacte  | WELDFYSRPI | RDENKKKLWE  | VLICESPLQF | RYSKFCSAQN | VNSIFLQEAL | NE  |
| 15Crinalium_epipsammum_PCC_933 | WELDFYSRPI | IDENQKKIWE  | VLVCESPVDF | RYAQYCPSTQ | VNSVSLQNAL | TE  |
| 07Microcoleus_sp_PCC_7113_Bac  | WELDFYSRPI | LDENQKKIWE  | ILVCESPLDF | QYTQFCPSQQ | VNSIWLREAL | AE  |
| 25Microcystis_sp_T1-4_Bacteri  | WELDFYSRPV | LDENKKKRWE  | LLICETPATF | KYASYCPNTM | VNSQWLGEAI | TA  |
| 28Stanieria_cyanosphaera_PCC_7 | WELDFYSRPI | LDEENKKVWE  | VLICESLTFD | RYSQYCSSKT | VNSLWLREAI | EK  |
| 30Cyanotheca_sp_PCC_8801_Bact  | WELDFYSRPI | LDENQKKLWE  | VVICETPLTF | KYSQFCSSQT | VNSVWLREAI | ES  |
| 19Pleurocapsa_sp_PCC_7327_Bac  | WELDFYSRPI | LDENKKKLWE  | VLICETPTDF | KYSQFCSNQS | VNSLWLQQEI | EK  |
| 23Cyanotheca_sp_PCC_7424_Bact  | WELDFYSRPI | LDENKKKLWE  | VLICQAPTEF | KYSEFCSNTT | VNSLWLGEAI | KK  |
| 12Chlamydomonas_reinhardtii_Eu | WEIDFCSRPL | LDERGKKVWE  | LLICDPERNF | EYSEYFPNSK | INSAELKRTI | ER  |
| 13Volvox_carteri_f_nagariensi  | WEIDFCSRPL | LDERGKKVWE  | LLICDPERKF | EYSEYFPNSK | INSAELKRAI | ER  |
| 22Micromonas_sp_RCC299_Eukary  | WQLDFCSRPM | KDERGKKMWE  | LLICDETFSF | EHSEFFPNNR | INSVELAKAI | DR  |
| 41Ostreococcus_tauri_Eukaryota | WQLDFCSRPL | RDDRGGKKVWE | LLVTDDERSF | EHAEYFPNNR | INSVELARAL | ER  |
| 36Selaginella_moellendorffii_E | WQLDFCSRPI | FDDRGGKRMWE | LIICDAKRQL | EFARFYPSNV | INSTTLKNAI | AE  |

|                                |            |             |            |             |            |    |
|--------------------------------|------------|-------------|------------|-------------|------------|----|
| 26Physcomitrella_patens_subsp_ | WELDFCSRPI | LDSRGKKLWE  | LVCDSRRQL  | QFTRFFPNNV  | INSVTLRDAL | LY |
| 33Vitis_vinifera_Eukaryota__Vi | WELDFCSRPI | LDIRGKKIWE  | LLVCDSLSL  | QYTKYFPNNV  | INSVTLKNAI | ES |
|                                | PTNIRFFRKQ | AVSIIRKAMD  | SLEIRAIKSR | STYALFDWLE  | ERSKNVYPFM | EG |
|                                | PDVIKFFRAQ | MFNMISIALS  | DLDINVKPSR | RTYALFEIIR  | EREKTIYPEM | IG |
|                                | PKVIKFFRSQ | MFNMINIALS  | DLDLIVRPSR | RTFSLYNKIS  | EREEKIYPNM | KG |
|                                | PRIIRFFRAQ | MRNMIQIAMQ  | NISVETRPSR | RTYALFLALA  | YRERNVYPRL | PG |
|                                | PTVIRFFRRQ | MLNMLTIALN  | GVALRVTPSR | ATHALYDWIE  | EREADVYPGM | EG |
|                                | PTVIRFFRNA | MFNMIDIALK  | EVEVAVKPCR | TTYAMYQWLE  | ERERDVYPAM | AG |
|                                | PNTIRFFRGA | MFNMINIALM  | ELPVTSKPSR | CTFALASWLE  | DRHENVYPQM | EG |
|                                | PSTIRFFRGA | MFNMINIALS  | EIDVIAKPSR | CTFALAQWIE  | DRNRDVYPKM | EG |
|                                | PTIIRFFRMQ | MRNMISIALA  | DLNIQVRPSR | RTYALQQAIR  | YREANVYPGM | PG |
|                                | PKVIRFFRGA | MRNMISIALS  | EFDVVVKPSR | RTYSLFALQR  | HRDKNVYPAM | PG |
|                                | PTTIRFFRAA | MFNMISIALS  | GLDVVAAPSR | RTYALFDMVA  | DRQANVYPSL | EG |
|                                | PSRVRFFRFS | MQTMITRACE  | DLGLAATPSR | RTLALQDWID  | YRQREVYPQD | PG |
|                                | PSRIRFFRQA | MKNMITKACN  | DLNLPSVLSR | RTYALNQLWQ  | QRFAEEYPKH | PG |
|                                | PTQIRFFRRQ | MNNMITKACK  | DLGINSKPSR | RTVALYRWLQ  | DRMDTVYPLE | PG |
|                                | PSKIRFFRRQ | MKNMITKACE  | EVAVIPVPSR | RHTLNLHWIV  | ERLKNHYPTL | DN |
|                                | PLKFRFFRTS | MNNMIVKACQ  | DLGIPAQPSR | RTLALHQWLQ  | QRNLDVYPLE | PG |
|                                | PVKFRFFRRQ | MNNMITKACE  | DLGIPAQPSR | RTLALNQLWQ  | QRMEEVYPHE | PG |
|                                | PTKFRFFRRQ | MNNMITKACK  | DLGIPAQPSR | RTLALLQLLK  | ERMDEVYPQE | PG |
|                                | PTRIRFFRRQ | MNNMITKACQ  | DSGIPAQSSR | RILVLHQWLQ  | QRMDEVYPQE | PG |
|                                | PVKIRFFRRQ | MNNMITKACE  | EIGIPAQTSR | RTLALNQLWQ  | QRMDEVYPQE | AG |
|                                | PIKVRFFRRQ | MNNMITKACQ  | DLGIPAQPSR | RTLLLNLQWLQ | QRMEEVYPQE | PG |
|                                | PIKIRFFRRQ | MNNMITKACQ  | DMGIPALPSR | KTLVLNQWIQ  | QRMEEVYPQE | PG |
|                                | PIKIRFFRRQ | MNNMITKACG  | DIGIPAQPSR | RTLVLNQLWQ  | QRIEQVYPQE | PG |
|                                | PSKIRFFRRQ | MNNMILKGCE  | DAGIPALASR | HTYTLNQLWLE | ERMTSFYPLQ | EG |
|                                | PKKIRFFRRQ | MNNMITKACE  | DLEITALPSR | RTYALQKWLQ  | ERLDQVYPQQ | EG |
|                                | PQKIRFFRRQ | MNNMIVKACT  | DLGILAEPSR | RTYAVHQWLR  | ERMQDVYPSH | PN |
|                                | PEKIRFFRRQ | MTNMITKACE  | ELGIQVIPS  | RTYTLERWLE  | QRILGFYPKH | PG |
|                                | PKKIRFFRRQ | MNNMISKACE  | DIGIPASPSR | RTHALTRWIE  | ERMVNFYPQE | VG |
|                                | PKKIRFFRRQ | MNNMITKACE  | DAGIAAAPSS | RTYALNHWLA  | TRMKEVYPQE | PG |
|                                | PQKIRFFRRQ | MNNMITKACE  | DAGIAAVPSR | RTYTLTHWLA  | ERDQQFYPTQ | PG |
|                                | PKKIRFFRRQ | MNNMIVKACE  | DLGIPPAPSR | RTYALERWLS  | QRLDEFYPNQ | PG |
|                                | PKKIRFFRRQ | MNNMISKACE  | DAGIDPAPSR | RTYALNQWIE  | ERMRDVYPQQ | EG |
|                                | PEKARFFRSQ | MQTIIITKALT | DCQIKAVPSR | RCFTVMSWIN  | ERLESVYKQD | PR |
|                                | PEKARFFRSQ | MQTIIITKALT | DCQIKAVPSR | RCFTVMSWIN  | ERLDSVYKTD | PR |
|                                | PRRFKFFRSQ | MQTIIITRACG | EVGVNPLPSR | RCQTMSRWLD  | ERLETVYKTH | PG |
|                                | PRRFKFFRAQ | MQTIIITRACT | EVDVEALASR | RCQTMTNWLD  | ERVESVYKKH | PG |

PTRVRYFRSQ VKTIISKACG ELGIQVTSSQ RCTALVRWLH ERYDQVYRQH PG  
 PEKIRFFRSQ MQTIITKACK ELDIQPVPSQ RCVTLIKWLE ERFETVYSQH PG  
 PEKIRFFRSQ MQTIVTKACK ELGIKPIPSK RCLSLILWLE ERYETVYTRH PG  
  
 FVYTRP-SEK LPMYLEGEDW SFSEVQLADI IENTKDMKEA GRVCPISIPK ST  
 -----VQLDEI LRNTKDMTEP GRVCEVGYDG KT  
 EDLSKRFPQR MPDILLGENF SFVLASLEEI NVILKQSVN KDSFKINKYD ID  
 FNASKKVPQK MPDALRGEKY IFASLSSDEL SSINSSDIAF SGFCPLEFDK NQ  
 LSLDLKVAAR LPDELQGDRF AFVTILLRDV TAA-----GF GELCPVGAPS ET  
 RMTAPVTASR LPEGLRGEQY AFVTLPSEV LSGGGINVG V GKLINVAYEV DA  
 -FFDIRTPTP LPDALRGEQY AFVTMPVSEF RQ-GNINVG V GRCLPLSLPD DA  
 SFLDVRTPV R LPDALRGEKY AFVALPVAEF LPGGSVNIG V GRICIDIPA DA  
 TFLDIRTAVK LPDALRGEKY AFVGLPLAEF LPGGGINIG V GRCLPVTLAA DS  
 TFLDLALTRR LPDALRCDSF AFARFPLAQL EEFFSERDYF GEKCLVDVAR DA  
 MQLNVSISEK LPDALRGERY AFVQLPYALL KEFSK---F GELCPVELKD DE  
 GVM DVSTTTP MPDALRGESF AFVQLPMSTA LGFFEAGEFF GDACRVAMAD DP  
 VGAPPPSPRR LPDALVGQRW AFVTLPARDF ADMPDWPMDF GEGFPLGIGD DT  
 VSFAATTAQS LPDALIGQKW AFVSLEAGML EEMDEWAIDF GEAFPLNLSP DA  
 VQFETPKPER LPDALQGDRW AFVSLEAGSF AEMSEWEIDF SEAFPIQITP DT  
 VQY PPLNAIA LPDAVKGDKW TLVTLPVQDF IEMDQWDIAF GEAFPLDLDP QL  
 VRGQKSDPQR LPDALIGQKW VVASLTGADL AQMPWEWIGF GEAFPLEVAS DT  
 VRMEVPLPQR LPDALIGQQW AFVTLEAAAF ADMPEWEWIGF GEAFPLGVKP ET  
 VKMESSPPQR LPDALTGQQW AFVNLEATAL ADMDEWEIAF GEAFPLGLSP ET  
 VRLDAPVPQR LPDALELENW AFVRLTAKDF LDMPEWEWIGF GEGFPLQISD DT  
 VRLESPLPQR LPDALEGEQL QFVTLSAADF ADMPEWNIDF GEAFPLGISS EN  
 VRLDSPLPQR LPDALEGQQW VFVLSAGEL AEMPEWDIGF GEAFPLQLSP EA  
 VRLERPLPQR LPDALEGKQW TFVSLGASDI TDMPEWEIAF GEAFPLGLSP EI  
 VRLEAPLPQR LPDALEWQQW GFVTLLGSEF ADMPDWEIDF GEGFPLQVSP ET  
 VQYPQTNPNV LPDALKKDKW ALVSLNGKDL EEMPEWDIGF REAFPLNISP DT  
 VQYPAENAVI LPDAIKGDKW AFVTLEAQAF QEMEDWDISF GEGFPLELAP ET  
 VQFEVQPPQP LPDALIGQKW MFVSLDASAF AEMHEWNIGF SEAFPLHLSP QT  
 VQYQPQIPQP LPDALEYDKW AFVTLEAGAF EEMNEWDIGF SEAFPLGLAP DT  
 VNY PPLNAV P LPDAVKADKW AFVTLELSSF NDLKDWDISF GENLPIGLDE NL  
 VQY PDLNAIP LPDAVRGDKW AFVSLEASAF AEMNEWEWIGF KEAFPLNLSS ET  
 VAYPELNAIP LPDAVKADKW AFVTLEASAL EEMNEWEWIGF GEGFPLGVTS EQ  
 VQY PPLNATP LPDAVKGDKW AFVSLEASAF EEMNEWDIAF GEAFPLGMTP DT  
 VQY PALNAV P LPDAIKGDKY AFVSLEAEAF AQMKEW DIAF GEAFPLGVTS EV  
 FQLDLGPPEA LPDALRGEQW AFVQLPLGTL LQMLKRAEIF GSGFTLDLPA DI  
 FQLDLGPPEA LPDALRGEQW AFVQLPLGTL LQMLRKGEIF GGTFSLDLPM DI  
 MGFEGGGPRP LPDALRGESW AFVALPLVGV REEAEQNRVF GDLEITLED DT

MAFEPTAPKR LPDALRGESW AFVALPLVGV -----F GALLDINLPD DT  
 LSMGVNVPKE VPPNYRGEKW AFVQLSFQAL QEEIKLGSNF GEVSLLP-SP DT  
 LLQQQSLPLD LPDALRGEW AF--LALAAV LEEMEGGDVF GSVLDLSP GI  
 LTLDNPFPMQ LPENLFGEKW AFVQLPFSAV QEEVSSRLVF GASLDLEVDA NT  
  
 STRARALAVA LQGVDISSVS IDEDRGEIVY DVGVEDKWKV GRLDERLLRE AA  
 SPRAKALAVA LKGADLSSVS VDGDRNEVY DIGVEDKWRI GKLDLRLVAE GT  
 SNRANSLANW INGLEVFSIS FDQEKSSIVL DCSLDTKFLF AKIDIKKIQT GT  
 SERAKSLSGW LDGVELCNVF CDLENKNLIL ECGLDIQFLF AKFSETKNSK NS  
 SRRALPLAAW FSGTELAYII ADEQQKEIYL ECGLDAAYLF ARIQPSLEAE AR  
 TRRSDALAMS LASTELAGVR ADAAQRLVL DVALDESFLV AKLDDQQRVE AA  
 TARAEPATW MTGLEVAYFK ADLKNRELAL ECGINTQYLV ARVQGDQRKE AQ  
 TNRAEALASW LAGTEVVALT ADLRKRVLVM ETDIDTQYLM AKLNESQRVE AA  
 TPRAKALASW LAGTEVAGLK ADLRKRELVM ETDIDNQYLM AKLNDQQRRE AA  
 ASRAAAIAGW MSGVELAAES SPRQAGHHPR V-----  
 SKRATPIAAW MSGLELSCIS ADMKKREILV QCCLDTSYLF GRVVPSTVDE AR  
 SKRAGVAAW MSGAEVAVK ADVATKEVVL LCGLSTSYLF ARLVGRITREE GK  
 SPRAVAMAGW MSGLELSELR VETKSPRLIL ETGAADSWIL SPLDSTLQTE AK  
 SPRAVPMAGW MSGLELGSLK LDTSTPRLLL ETGGSDRWIL ASLNAQVQTE AQ  
 SNRAKAIAAW MSGLELGFLK PELEPGQVVL ETGFNERWIL ANLDKTTRAE AQ  
 SNRAIPLAGW LSGLEIGSCY VEDQLSRLRL ETGLSDSWIL ADIDEQQQSE AR  
 SPRAVPLAGW MSGLEIAALK VDTNPARLIL ETGASDSWIL ANVNPQTLQM AQ  
 SPRAMPLAGW MSGLELANIK FDSETPQLL ETGVTESWIL ASFDPQMIAE AK  
 SERALPLAGW MSGLELAFIR VETPVARLLL ETGASESWIL ANLNPQTVAE AQ  
 SSRSLPLAAW MSGLELGYLK FDQEGRLLL ETGATESWIV ANINSQVINE AK  
 SNRALPIAAW MSGLELAWLR FDSKTGRLLL ETGATESWIL ANINPQMLLE AQ  
 SPRALPLAGW MSGLELAFLR VDQVGTLLIL ETGATESWIV ANINPQLLVE AK  
 SPRALPIAGW MSGLELAYLR LDSQGDRLVL ETGGTESWIL ANLTPQLLAE AK  
 SPRALPLAGW MSGLDLAWLR FDDQGGRLLL ETGATESWIL ANLNPQILAE AR  
 SSRALPLAGW MSGLELGYLR LDRKFPSICL ETGVSDSWIL VNLDKNTLSE AE  
 SPRAMPFAGW MSGIELSQIQ LQESLPRVL QTGSSDCWIL ADINPETLKE AQ  
 SPRAIPMAAW MSGIEPALIK FYPPQARLLL ETGGSDSWFL VKQNGSSQTE AA  
 SSRATPLAGW MSGLELAFVR FDESARLLL ETGASDSWIL ATLDSQTLAE AQ  
 SPRALPLAGW MSGLEMAYLK LEASRPLRL ETGASDSWIL VNVNAETLNE AK  
 SPRATLLAAW LSGLEMGLFH LESPRPRICL NTGLSDSWVL VNLTPSTLTE AK  
 SDRALPLAAW MSGLELGFLL FEEPRIVRL ETGTSDSWIL VNIDAPTLEAE AQ  
 SSRALPLAGW MSGLELAFLK FEGRSRIVRL ETGASDSWIL ASLDPKMLAE AK  
 SSRALPLAGW MSGLEMGYLK LEESRPILRL ETGVSDSWIL LNVNPQTLAE AK  
 SRRALPLAAW TNGLEIAAVK ADVARSCLIL ETGVNQRWKY GSWNEDSIGE AE  
 SRRALPLAAW TNGLEIAAVK ADVQRSCLIL ETGVNQRWKY GSWNEDSIGE AE

TRRAAALAGW TKGLELGGIS VDFDMGTL L DTGVSWSWQY ARFTKELMKE AR  
 TSRAAVSAA- ----- ----HIVL ETGVNDSWSY AFFTPELTKE PK  
 SSRDLALAAW TNSLELASLS VDKKNSALVL LSGASRQWFY SYYSKQADEE AD  
 SSRATPLAAW TNALELASLE VDTQRSCLVL STGVADRWR Y AFYSRQTDAE GE  
 SSRAKPLAAW MNGLEVCSIE ADTARACLIL SVGISTRYIY ATYTPVTTSE AE

LGGLHF LAIH QLPKDEIEGF WLMRQ

LGGLHF LAIH QL----- ----

NSGFHFISVM SGLPNKIYGF WLLNE

SQGIHFVAVQ SYSKNEIAGI WTLKS

ARGLHF LAIQ EKPDEDVCGF WLLRD

LGGLHFV VVQ SPEDGE PAGF WLLRE

LGGFHFVAVQ SNPDDDVAGF WLLKE

LKGLHFVSVQ ENEDSDPTGF WLLRE

LNLHFISVQ KDEDDDPAGF WLLRE

-----

LNLHFVAVQ KDEEDEV DGF WLLQE

SGGIHF LAVM VEEGDEVEGF WLLRE

ANQVHF LALQ ENPAEAFAGF WLMQG

ANGVHF LAIQ AAPDETFAGF WLLQE

AQGVHF LAIQ TDPNESFAGF WLLQE

VQQIHF LAIQ SSPEDSFAGL WLLKD

ANQVHF LAVQ SSPEEVFAGF WLLQE

ANGVHF LAVQ ANPEEAFAGF WLLQE

ANGVHF IAVQ SNPQESFAGF WLLQE

ANGVHF IGVQ ANPQESFAGF WLLQE

ANGVHF IGVQ SDPTESFAGF WLLRE

ANGVHF IGVQ SSPQESFAGF WLLQE

ADGVHF IGVQ SDPQQSFAGF WLLKE

ANGVHF IGVQ SDPQQSFAGF WLLCE

ANGVHF LAIQ SSPEQSFEAF WLLLE

AKGVHF LAIQ TDPSESFAGF WLLA-

AKGVHF LAIQ SSPQEDFAGF WLLQE

AEGVHF LAIQ STPTESFAGF WLLQE

ANNLHF LAVQ SNPEESFAGF WLLQE

AQGVHF LAIQ SSTEESFAGF WLLLA

GQQVHF LAIQ SSPDES FAGF WLLKE

AQQVHF LAIQ SNPEQS FAGF WLLKE

ANNVHF LAVQ SSPEESFSGF WLLKE

VKGVHF LAVQ PDPDEELNGL WLLQD

VKGLHFLAVQ PDPDEELNGL WLLQD  
VNLHFLAIQ TDEETTDGF WILQD  
CGGVT----- -----DGF WILRD  
AGGLHFLAIQ PSLENSCSGL WILYD  
CGGLHFLAVQ SSLDELCTGF WLLID  
CGGLHFLAIQ DDLNDDCVGF WLLLD

## Alignment: PGK

|                                |             |            |            |            |            |
|--------------------------------|-------------|------------|------------|------------|------------|
| 108Aureococcus_anophagefferens | RGKLGLEGLA  | SKDLGSSRVL | IRLDLNVPLD | DGITDDTRLR | AVVPTMNFLK |
| 156Phytophthora_capsici_Locald | TSKLSLELLA  | QRSLKGARVL | VRADLNVPLN | ATITDDTRIR | AVLPTLKLLQ |
| 162Schizochytrium_limacinum_Lo | TSKLSLEQLA  | QRSLKGARVL | VRADLNVPLN | QTITDDTRIR | AVLPTLKLLQ |
| 18Phaeodactylum_tricornutum_CC | EAKASIEDLS  | DAELKGKKVL | VRCDVNVPLD | GKITDDTRIR | SSIPTIEYLK |
| 22Thalassiosira_pseudonana_CCM | DAKKSIEDLS  | EADLKGKKVL | VRCDVNVPLD | GKITDDTRIR | SSIPTIEYLK |
| 24Thalassiosira_pseudonana_CCM | ATKCCISDLP  | AADLKGKKVL | VRCDLNVPLD | GKITDDTRIR | SSIPTIEYLT |
| 02Galdieria_sulphuraria        | SKKKSLLKDL  | AADLKGKRVL | VRCDLNVPLD | GKITDDTRIR | ASLPTIQYLI |
| 49Cyanidioschyzon_merolae_Euka | MRVRSIRDQ   | DAEIRGKRVF | VRSDLNVPLD | GKITDDTRIR | ASVPTIKYLA |
| 13Physcomitrella_patens_subsp_ | EKKASIKDVP  | ESEFQGKVVV | VRADLNVPLN | DAITDDTRIR | ASLPTIQHLT |
| 120streococcus_lucimarinus_CCE | AKKKSVDGLA  | ESDLKGQTVF | VRCDLNVPM  | ADITDDTRIR | AAIPTLEYLA |
| 14Micromonas_pusilla_CCMP1545_ | AAKKSVDGLK  | EADLKGKTVF | IRCDLNVPLD | GAITDDTRIR | AAIPTLEYLV |
| 01Cyanophora_paradoxa          | LAKKSVKNLT  | EADLKGKRVF | IRCDLNVPLD | KEITDDTRIR | AAVPTIQYLA |
| 10Volvox_carteri_f_nagariensi  | AVKKSVDGLG  | KADLEGKRVF | VRADLNVPLD | KKITDDTRIR | AAVPTLKYLL |
| 11Chlamydomonas_reinhardtii_Eu | AVKKSVDGLH  | KADLEGKRVF | VRADLNVPLD | KAITDDTRIR | AAVPTLKYLL |
| 08Ectocarpus_siliculosus       | VKKLSVDGLK  | DEDLKGKKVL | VRCDLNVPLS | DKIGDDTRIR | ASIPTIEHLL |
| 09QUERY_jgi_Bigna1_92730_estEx | EKKMSVDGLK  | KEELDQKVAL | VRCDLNVPLD | GKITDDTRIR | ASIPTIKHLV |
| 99Lth_pgk_92730                | -----       | -----      | -----      | -----      | -----      |
| 07Guillardia_theta_CCMP2712    | -KKSVDGLK   | GADLKGKKVL | IRCDLNVPLD | GKITDDTRIR | ASVQTLKYLL |
| 05Ectocarpus_siliculosus       | KPKKSVDGLT  | SEDLKGKRVL | VRCDLNVPLD | GSITDDTRIR | ASIPTVKFLV |
| 03Isochrysis_galbana           | --KKSVDGLT  | KADLEGKRVL | VRCDLNVPLD | GKITDDTRIR | ASIPTIKYLI |
| 157Pyropia_yezoensis_Localdb__ | TAKKSIKDLT  | AADLAGKRVL | VRCDLNVPLD | GKITDDTRIR | ASIPTIEYLT |
| 06Pyropia_yezoensis            | TAKKSIKDLT  | AADLAGKRVL | VRCDLNVPLD | GKITDDTRIR | ASIPTIEYLT |
| 04Chondrus_crispus             | --KKSVDGLS  | PADIAGKRVL | VRCDLNVPLD | GKITDDTRIR | ASVPTIKFLM |
| 30Synechococcus_sp__JA-3-3Ab_B | MAKQTLGSL   | SSDLKGKRVL | VRADFNVPLD | PQITDDTRIR | ASLPTIQALA |
| 34Synechococcus_elongatus_PCC_ | MSKRTLASLT  | AADLEGKRVL | VRVDFNVPLD | GNITDDTRIR | AALPTIRYLS |
| 23Synechococcus_sp__PCC_7335_B | MAKKALADLS  | ASDVSGKRVL | VRADFNVPLD | DAITDDTRIR | AALPTIQDLT |
| 26Thermosynechococcus_elongatu | MSKKSVAQLS  | AADLEGKRVL | VRVDFNVPLD | EKITDETRIR | AALPTIQDLI |
| 21Microcystis_sp__T1-4_Bacteri | MPKKTVANLT  | EADLAGKRVL | VRVDFNVPLD | KAISDDTRIR | AALPTIEDLI |
| 17Microcoleus_chthonoplastes_P | MSKKTVANLN  | ESDLAGKRVL | VRADLNVPLD | ENITDDTRIR | AALPTIQDLI |
| 37Cyanotheca_sp__PCC_7425_Bact | MSKKTVANLS  | AADLAGKRVL | VRVDFNVPLD | DQITDDTRIR | AALPTIQDLT |
| 25Microcoleus_vaginatus_FGP-2_ | MTKKTVANLS  | ASDLSGKRVL | VRADFNVPLD | N-ITDDTRIR | AALPTIQDLA |
| 27Raphidiopsis_brookii_D9_Bact | MSKKSLSASLS | AADISDKRAL | VRVDFNVPLD | DQITDDTRIR | AALPTIQDLI |
| 16Fischerella_sp__JSC-11_Bacte | MSKKTLANLS  | ATDLSGKRAF | VRVDFNVPLD | DAITDDTRIR | AALPTIQDLV |

51

|                                |            |            |            |            |            |
|--------------------------------|------------|------------|------------|------------|------------|
| 108Aureococcus_anophagefferens | EQGAQVVVAT | HIGRPKGPDA | KFSVAPIVGR | FSELLDTRDV | KVDDCVGDDV |
| 156Phytophthora_capsici_Locald | GAGARTVLCS | HLGRPGGAKD | ELRLTPVAVR | LGELGSPVK  | KLDDCIGSQV |
| 162Schizochytrium_limacinum_Lo | GAGARTVLCS | HLGRPGGAKD | ELRLTPVAAR | LGELGSPVK  | KLDDCIGPQV |



|    |                                      |             |             |              |              |               |
|----|--------------------------------------|-------------|-------------|--------------|--------------|---------------|
| 18 | <i>Phaeodactylum_tricornutum_CC</i>  | NKGAI VSVCS | HLGRP KDPED | KFSLG PCAER  | MGELL GQTVT  | LAPDC IGEEV   |
| 22 | <i>Thalassiosira_pseudonana_CCM</i>  | GKGAI VTVCS | HLGRP KDPED | KFSLG PCAER  | MGELL GQEVK  | LAPDC IGEEV   |
| 24 | <i>Thalassiosira_pseudonana_CCM</i>  | KAGAI VTVCS | HLGRP KDPED | KFSLA PCATR  | MGELL GQEVK  | LAPDC IGDEV   |
| 02 | <i>Galdieria_sulphuraria</i>         | NHGAK VILSS | HLGRP KGFED | RYSLA PV AER | LGQLL GKSVR  | MAPDC IG DQV  |
| 49 | <i>Cyanidioschyzon_merolae_Euka</i>  | DKGAK VIVVS | HLGRP KGFED | KYSLA PV AER | LSELL GKKVR  | MAKDC IG DAV  |
| 13 | <i>Physcomitrella_patens_subsp_</i>  | KAGAK VVLAS | HLGRP KKPED | KFSLK PVAGR  | LTELL GQTV E | LAPDC IGAEV   |
| 12 | <i>Streptococcus_lucimarinus_CCE</i> | KNGAK VLVTS | HLGRP KNPED | KFRLT PVGAR  | LSEKL SCPVT  | KVDDC V GDEV  |
| 14 | <i>Micromonas_pusilla_CCMP1545_</i>  | KNGAK VLVTS | HLGRP KDPED | KFRLT PVGDR  | LAELL DCSVT  | KIDDC V G DVV |
| 01 | <i>Cyanophora_paradoxa</i>           | SKGAK VLVTS | HLGRP KSPED | KFRLT P-AAR  | LSELL GKPVK  | KTNDC IGAEV   |
| 10 | <i>Volvox_carteri_f_nagariensi</i>   | DNGAK VLLTS | HLGRP KGPED | KYRLT PVVAR  | LSELL GKEVK  | KVDDC IGPSV   |
| 11 | <i>Chlamydomonas_reinhardtii_Eu</i>  | DNGAK VLLTS | HLGRP KGPED | KYRLT PVVAR  | LSELL GKPV T | KVDDC IGPEV   |
| 08 | <i>Ectocarpus_siliculosus</i>        | SKGAR VALSS | HLGRP KDPED | KFSLG PV AER | LTKLL GK DCK | MAPDC V GDEV  |
| 09 | QUERY_jgi_Bignal_92730_estEx         | ESGAK VLLTS | HLGRP KDPED | KFSLA PV AAR | LSELL GQDVT  | FVKDC IGEPV   |
| 99 | Lth_pgk_92730                        | -----       | -----       | -----        | -----        | -----         |
| 07 | <i>Guillardia_theta_CCMP2712</i>     | DNGAR VAVSS | HLGRP KDPED | KFSLA PCATR  | LGELL GK DVK | MAKDC IGDDV   |
| 05 | <i>Ectocarpus_siliculosus</i>        | DKGAK VLLSS | HLGRP KDPED | KFSLA PV SER | LTKLL GK KVT | MAPDC IGPEV   |
| 03 | <i>Isochrysis_galbana</i>            | DNGAK VLLSS | HLGRP KGPED | KFSLG PV APR | LSELL GKEVT  | MAPDC IGDAV   |
| 15 | <i>Pyropia_zezoensis_Localdb_</i>    | AAGAK VLLSS | HLGRP KSPED | KFSLA PVATR  | LSELL KKDVK  | MAPDC IG DGV  |
| 06 | <i>Pyropia_zezoensis</i>             | AAGAK VLLSS | HLGRP KSPED | KFSLA PVATR  | LSELL KKDVK  | MAPDC IG DGV  |
| 04 | <i>Chondrus_crispus</i>              | EAGAK VLLSS | HLGRP KDPED | KFSLS PV AAR | LTQLL GK DVT | MAPDC IG DGV  |
| 30 | <i>Synechococcus_sp_JA-3-3Ab_B</i>   | QAGAK VILTS | HLGRP KAARE | GNSLA PVAVR  | LAQLL GQPVA  | FAPDC IGPEA   |
| 34 | <i>Synechococcus_elongatus_PCC_</i>  | ESGAK VILVS | HFGRP KGPVE | SMRLT PV AER | LSELL GRPVV  | KTTDAV GAGA   |
| 23 | <i>Synechococcus_sp_PCC_7335_B</i>   | SKGAK VILAS | HFGRP KGVVE | SMRLT PV AAR | LSEKL GQDVI  | KCDDC IG DDEV |
| 26 | <i>Thermosynechococcus_elongatu</i>  | SKGAK VILVS | HFGRP KGVDE | KLRLT PV AQR | LSELL HKPVA  | KLDDC IGDAV   |
| 21 | <i>Microcystis_sp_T1-4_Bacteri</i>   | KKGAK VILCS | HMGRP DGVKE | NLRLT PV AKR | LSELL GQEVV  | MCPDC IGEGV   |
| 17 | <i>Microcoleus_chthonoplastes_P</i>  | KKNAK VVMCS | HLGRP KGVKD | SLRLT PV ANR | LSELL GQTVV  | KCDDC IGDAV   |
| 37 | <i>Cyanothece_sp_PCC_7425_Bact</i>   | SKGAK VILSS | HFGRP KGVKD | KFRLT PV AAR | LSELL GKPV P | KPNDC IGEEV   |
| 25 | <i>Microcoleus_vaginatus_FGP-2_</i>  | SKGAK VILCS | HFGRP KGVTE | KLRLT PV AKR | LSELL GKEVK  | KTDDC IG DDEV |
| 27 | <i>Raphidiopsis_brookii_D9_Bact</i>  | SKGAK VILAS | HFGRP KGVDE | KFRLT PV AKR | LSELL GQEV I | KTNDC IGDDV   |
| 16 | <i>Fischerella_sp_JSC-11_Bacte</i>   | QKGAK VILAS | HFGRP KGVDE | KLRLT PV AKR | LSELL GQEVV  | KTDDC IG DDEV |

## 101

|     |                                     |             |             |             |             |             |
|-----|-------------------------------------|-------------|-------------|-------------|-------------|-------------|
| 108 | <i>Aureococcus_anophagefferens</i>  | AQACG AMPAG | GVVLL ENVRF | HTGET KNFDD | FAAAL AGSAT | AYVNDA FGTA |
| 156 | <i>Phytophthora_capsici_Locald</i>  | DADID ELKDG | EIVLL ENVRF | YKQET KNDPE | FAKKLA HGAD | IYVNDA FGTA |
| 162 | <i>Schizochytrium_limacinum_Lo</i>  | DAGID ALQDG | EIVLL ENVRF | YKQET ENDPE | FAKQLA HSAD | IYVNDA FGTA |
| 18  | <i>Phaeodactylum_tricornutum_CC</i> | AKIVN DAKEG | DVIML ENTRF | YKEET KNDPE | FVEKLA APFD | LYVNDA FGTA |
| 22  | <i>Thalassiosira_pseudonana_CCM</i> | STLVN AAKEG | DVIML ENTRF | YKEEEK NEAG | FVEKLA APFD | LFVNDA FGTA |
| 24  | <i>Thalassiosira_pseudonana_CCM</i> | ATMVAE AKEG | DVVM LENTRF | YKEET KNDPE | FVEKLA KPFD | MYVNDA FGSA |
| 02  | <i>Galdieria_sulphuraria</i>        | NNMVL AMNDG | DIILL ENVRF | YTEET DNDPD | FSRKL SMNMD | LYVNDA FGSA |
| 49  | <i>Cyanidioschyzon_merolae_Euka</i> | ATEVA AMSPG | DVVLL ENVRF | YPEEEK NDPD | FARKLA ANAD | LYVNDA FGTA |

|     |                              |            |             |             |            |            |
|-----|------------------------------|------------|-------------|-------------|------------|------------|
| 13  | Physcomitrella_patens_subsp_ | ESKIAALKNG | EVLLLENVRF  | YKEEEEKNDSE | FSQKLAKGVD | IFVNDAFGTA |
| 12  | streococcus_lucimarinus_CCE  | AKAVASMPNG | SVCLLENTRF  | YKEEEEKNDSD | FAKKLAGSAT | IFVNDAFGTA |
| 14  | Micromonas_pusilla_CCMP1545_ | KDAIAGMENG | SVCLLENVRF  | YKDEEKNGAD  | FAKQLAEHAD | LYVNDAFGTA |
| 01  | Cyanophora_paradoxa          | ESAVAAMSEG | DVILLENVRF  | YPREEEKNDAE | FAKKLAANAD | LYVNDAFGTA |
| 10  | Volvox_carteri_f__nagariensi | EQAVASLKSG | ELLLLENVRF  | YKEEEEKNDPE | FAKKLASNAD | LYVNDAFGTA |
| 11  | Chlamydomonas_reinhardtii_Eu | EKAVGAMKNG | ELLLLENVRF  | YKEEEEKNEPE | FAKKLAANAD | LYVNDAFGTA |
| 08  | Ectocarpus_siliculosus       | AKIADGLGDG | EVMLLENVRF  | YPAETKNDKD  | FAEKLAAPFD | LFVNDAFGTA |
| 09  | QUERY_jgi_Bignal_92730_estEx | KEAVATMTPG | SVALLENVRF  | YKEETKNEPE  | FAKKLAANAD | LFVNDAFGTA |
| 99  | Lth_pgk_92730                | -----      | -----       | -----       | -----      | -----      |
| 07  | Guillardia_theta_CCMP2712    | TKLVDSLKDG | EICLLENTRF  | YKQEEKNDKE  | FSKKLAAPFD | IYVNDAFGTA |
| 05  | Ectocarpus_siliculosus       | ASLVDDMKNG | GVLLLENVRF  | YKEETKNDSD  | FAKKLAANAD | LFVNDAFGTA |
| 03  | Isochrysis_galbana           | ADCVTKMANG | DVLLLENTRF  | YKEEEEKNDPE | FAEKLAANAD | MFVNDAFGTA |
| 157 | Pyropia_yezoensis_Localdb__  | AEIVSGMSNG | DVTLLLENVRF | YKEETANDTE  | FAKKLAANAD | MFVNDAFGTA |
| 06  | Pyropia_yezoensis            | AEIVSGMSNG | DVTLLLENVRF | YKEETANDTE  | FAKKLAANAD | MFVNDAFGTA |
| 04  | Chondrus_crispus             | TKIVSGMANG | DVTLLLENVRF | YKEETKNDPD  | FAKKLAANAD | FFVNDAFGTA |
| 30  | Synechococcus_sp__JA-3-3Ab_B | EAVVSSLENG | QVALLENVRF  | HPREEEANDPE | FARKLASLAD | LFVNDAFGSA |
| 34  | Synechococcus_elongatus_PCC_ | EAQVAATSNG | QVVLLLENVRF | HAEEEEANDAE | FAKALASLAD | IYVNDAFGAA |
| 23  | Synechococcus_sp__PCC_7335_B | AAKIAEMKDG | DVALLENVRF  | YDGETNNEPE  | FAKQLAANAD | LYVNDAFGTA |
| 26  | Thermosynechococcus_elongatu | IAHTQAMANG | DVCLLENVRF  | HPGEEKNDPE  | FAKQLAACAE | VYVNDAFGTA |
| 21  | Microcystis_sp__T1-4_Bacteri | TAAISQMSNG | QVALLENLRF  | HGEEEEANDPD | FAKKLAANAD | LYVNDAFGTA |
| 17  | Microcoleus_chthonoplastes_P | KSQIDSLDNG | QVALLENLRF  | HPGEEKNDPE  | FTKKLALAD  | VYVNDAFGTA |
| 37  | Cyanothece_sp__PCC_7425_Bact | KAQVAAMQNG | DVLLLENVRF  | HPGEEANTPE  | FAQELASVAD | LYVNDAFGTA |
| 25  | Microcoleus_vaginatus_FGP-2_ | AATVAGMQDG | DVLLLENVRF  | YPREEEANDPE | FAKKLASVAD | LYVNDAFGTA |
| 27  | Raphidiopsis_brookii_D9_Bact | TARVAALEQG | QVLLLENVRF  | HKEEEEKNDPE | FARQLAANAD | FYVNDAFGTA |
| 16  | Fischerella_sp__JSC-11_Bacte | AAKVEALQNG | QVLLLENVRF  | YKEEEEKNDPE | FAKKLAANAD | LYVNDAFGTA |

151

|     |                              |            |            |            |            |            |
|-----|------------------------------|------------|------------|------------|------------|------------|
| 108 | Aureococcus_anophagefferens  | HRAHASTEGV | VKFIGPAAGG | YLMEKELVYI | KGAIDDPKRP | LTAILGGAKV |
| 156 | Phytophthora_capsici_Locald  | HRAHASTEGV | TNYIKTNVAG | FLIEKELKYL | SGAVDAPVRP | LGAIIGGAKV |
| 162 | Schizochytrium_limacinum_Lo  | HRAHASTEGV | TNYVKTNVAG | FLIEKELKYL | SGAVDAPVRP | LGAVIGGAKV |
| 18  | Phaeodactylum_tricornutum_CC | HRAHASTEGV | TKFLKPSVGG | FLLAKELEYL | DGAISNGKKP | MAAIVGGSKV |
| 22  | Thalassiosira_pseudonana_CCM | HRAHASTEGV | TKFLQPSVSG | FLLAKELEYL | DGAIENGKKP | MAAIVGGSKV |
| 24  | Thalassiosira_pseudonana_CCM | HRAHASTEGV | TKYLHPSVSG | FLLAKELKYL | AGAIDNGEKP | MAAIVGGSKV |
| 02  | Galdieria_sulphuraria        | HRAHASTEGV | TQFIRPAVAG | FLLEKELEYL | QNAIQNPERP | FAAIVGGSKV |
| 49  | Cyanidioschyzon_merolae_Euka | HRAHASTEGV | TAFLKPAVAG | FLLEKELDYL | SNAIESPKRP | FAAIVGGSKV |
| 13  | Physcomitrella_patens_subsp_ | HRAHSSTAGI | AEYVGKTVAG | FLLEKELAYL | AGAVKAPARP | FVAIVGGSKV |
| 12  | streococcus_lucimarinus_CCE  | HRAHASTEGV | TKYCKTNVAG | FLLQKELDYL | DGAVSNPERP | FCAIVGGSKV |
| 14  | Micromonas_pusilla_CCMP1545_ | HRAHASTAGV | TEFLSPSVAG | FLLQKELDYL | DGAVSNPERP | FCAIVGGSKV |
| 01  | Cyanophora_paradoxa          | HRAHGSTAGV | TAYLKPSVAG | FLLEKELEYL | AGAVDEPVRP | LVAIVGGSKV |
| 10  | Volvox_carteri_f__nagariensi | HRAHASTEGV | TKFLKPSVAG | FLLQKELDYL | DGAVSAPKRP | FVAIVGGSKV |

|                                |            |            |            |            |            |
|--------------------------------|------------|------------|------------|------------|------------|
| 11Chlamydomonas_reinhardtii_Eu | HRAHASTEGV | TKFLKPSVAG | FLLQKELDYL | DGAVSNPKRP | FVAIVGGSKV |
| 08Ectocarpus_siliculosus       | HRAHCSTEGV | TKFLSPSVAG | FLLQKELDYL | AGAVQEPKRP | FAAIVGGSKV |
| 09QUERY_jgi_Bigna1_92730_estEx | HRAHGSTEGV | TAHLKPSVAG | FLLQKELDYL | QGAVAEPARP | FAAIVGGSKV |
| 99Lth_pgk_92730                | -----      | -----      | -----      | -----      | --AIVGGSKV |
| 07Guillardia_theta_CCMP2712    | HRAHSSTAGV | TEFIPTSVAG | FLLQKELDYL | DGAVANPKRP | FAAIVGGSKV |
| 05Ectocarpus_siliculosus       | HRAHGSTEGV | TKYLSPSVAG | FLLQKELDYL | QGAVAEPKRP | FAAVVGGSKV |
| 03Isochrysis_galbana           | HRAHGSTEGV | TKFLSPSVAG | FLLQKELDYL | DGAVSDPKRP | FAAIVGGSKV |
| 157Pyropia_yezoensis_Localdb__ | HRAHGSTAGV | TEFLRPSVAG | LLLEKELAYL | AGAVSNPKRP | FAAIVGGSKV |
| 06Pyropia_yezoensis            | HRAHGSTAGV | TEFLRPSVAG | LLLEKELAYL | AGAVSNPKRP | FAAIVGGSKV |
| 04Chondrus_crispus             | HRAHGSTAGV | TAHLKPSVAG | LLLEKELAYL | AGTVSDPARP | FAAIVGGSKV |
| 30Synechococcus_sp__JA-3-3Ab_B | HRAHASTAGV | TAYLQPAVAG | YLVEKELQFL | SGAIENPQRP | LAAIIGGSKV |
| 34Synechococcus_elongatus_PCC_ | HRAHAPTAGV | TEYLSPCVAG | YLLEKELQYL | QAAIDNPQRP | LAAIIGGSKV |
| 23Synechococcus_sp__PCC_7335_B | HRAHASTAGV | TEYLSPAVAG | SLIEKELKFL | QETVDNPQRP | LAAIIGGSKV |
| 26Thermosynechococcus_elongatu | HRAHASTAGV | TQYLSPCVAG | FLMEKELEYL | QNAIEHPRRP | LAAIIGGSKV |
| 21Microcystis_sp__T1-4_Bacteri | HRAHASTEGV | THYLSPSVAG | YLIEKELNYL | QAAIETPQRP | LAAIIGGSKV |
| 17Microcoleus_chthonoplastes_P | HRAHASTEGV | THHLQPSVAG | YLIEKELQYL | QNAIENPQNP | LAAIIGGSKV |
| 37Cyanotheca_sp__PCC_7425_Bact | HRAHASTEGV | TRYLRPSVAG | YLIEKELQYL | QSAIENPQRP | LAAIIGGSKV |
| 25Microcoleus_vaginatus_FGP-2_ | HRAHASTEGV | TKYLSPSVAG | FLMEKELQYL | GSAIDNPQRP | LAAIIGGSKV |
| 27Raphidiopsis_brookii_D9_Bact | HRAHASTEGV | TKYLSPSVAG | YLVEKELQYL | QAAIEFPQRP | LAAIIGGSKV |
| 16Fischerella_sp__JSC-11_Bacte | HRAHASTEGV | TQFLSPCVAG | YLVEKELQYL | QRAIESPQRP | LAAIIGGSKV |

## 201

|                                |            |             |            |            |            |
|--------------------------------|------------|-------------|------------|------------|------------|
| 108Aureococcus_anophagefferens | STKIPVIESM | LDKCDNVLVG  | GGMIFTFYKA | MGHVSGASLI | EEDMVPMAKD |
| 156Phytophthora_capsici_Locald | STKIPVLKSL | LQKCDKIMIG  | GGMIFTFYKA | QGLDVGKSII | EEDKVELAKD |
| 162Schizochytrium_limacinum_Lo | STKIPVLKSL | LQKCDKIMIG  | GGMIFTFYKA | QGLDVGKSII | EEDKVELAKE |
| 18Phaeodactylum_tricornutum_CC | SSKITVLEAL | LDKCDKVIIG  | GGMVFTFLKA | KGFNVGTSLV | EDDFVDTAKE |
| 22Thalassiosira_pseudonana_CCM | SSKITVLNAL | LDKCDKIIIG  | GGMVFTFLKA | KGLNVGTSLV | EDDYVETAKE |
| 24Thalassiosira_pseudonana_CCM | SSKITVLNAL | LDKCDKIIIG  | GGMVFTFLKA | KDLSVGTSLV | EDDYVETAKE |
| 02Galdieria_sulphuraria        | SSKIGVLKSL | IEKCDVIIIG  | GGMVFTFLKA | RGLSVGSSLV | EEDKLYLAKE |
| 49Cyanidioschyzon_merolae_Euka | STKIAVLEKL | LQKCDTIIIG  | GGMVFTFLRA | RGLKTGSSLV | EEDKIELARV |
| 13Physcomitrella_patens_subsp_ | SSKITVIESL | MNVCDKVIILG | GGMIFTFFKA | DGKDVGSSLV | EDDKIDLAKD |
| 120streococcus_lucimarinus_CCE | SSKIGVIESL | LQKTDKIILG  | GGMIFTFYKA | LGKSVGASLV | EDDKIDLAKE |
| 14Micromonas_pusilla_CCMP1545_ | SSKIGVIESL | LEKTDKIILG  | GGMIFTFYKA | LGKSVGSSLV | EDDKIDLAKE |
| 01Cyanophora_paradoxa          | SSKIGVIESL | LNKCDKLIIG  | GGMVFTFYKA | RGLPTGSSLV | EEDKVELAKK |
| 10Volvox_carteri_f__nagariensi | SSKITVIEKL | MEKCDKIIIG  | GGMIFTFYKA | RGLKVGSSLV | EEDKLELAKN |
| 11Chlamydomonas_reinhardtii_Eu | SSKITVIEAL | MEKCDKIIIG  | GGMIFTFYKA | RGLKVGSSLV | EDDKIELAKK |
| 08Ectocarpus_siliculosus       | SSKIGVIESL | LAKCDKLIIG  | GGMVFTFLKA | RGLGVGSSLV | EEDKLELAKE |
| 09QUERY_jgi_Bigna1_92730_estEx | SSKIGVIESL | LEKVDKLVIG  | GGMVFTFLKA | RGLEVGSLSV | EEDKLELAKD |
| 99Lth_pgk_92730                | SSKIGVIESL | LEKCDKLIIG  | GGMVFTFLKA | RGLEVGTSLV | EEDKLELAKN |
| 07Guillardia_theta_CCMP2712    | SSKIGVIESL | LGKCDKLVIG  | GGMVFTFLKA | RGLNVGSSLV | EEDKLELAKS |

|                                 |            |            |            |             |            |
|---------------------------------|------------|------------|------------|-------------|------------|
| 05Ectocarpus_siliculosus        | SSKIGVIDSM | LNKVDMLVIG | GGMVFTFLKA | RGLSVGSSSLV | EDDKLDLARE |
| 03Isochrysis_galbana            | SSKIGVIESL | MEKVDKIVIG | GGMVFTFLKA | RGLETGSSSLV | EEDQLELAKK |
| 157Pyropia_zezoensis_Localdb__  | SSKIGVIESM | LDKVDKLVIV | GGMVFTFLKA | RGLSTGSSSLV | EDDKIELAKE |
| 06Pyropia_zezoensis             | SSKIGVIESM | LDKVDKLVIV | GGMVFTFLKA | RGLSTGSSSLV | EDDKIELAKE |
| 04Chondrus_crispus              | SSKIGVIDSL | LQKVDKLIIG | GGMVFTFLKA | KGLNVGSSSLV | EDDKLELARE |
| 30Synechococcus_sp__JA-3-3Ab_B  | STKIGVIERL | LEKVDKLLLG | GGMIFTFYQA | QGIPTGKSLV  | ETDKLDLARS |
| 34Synechococcus_elongatus_PCC_  | SSKIGVIETL | LDKCDKLLIG | GGMIFTFYKA | QGLSVGGSLV  | EEDKLDLARS |
| 23Synechococcus_sp__PCC_7335_B  | SSKIGVIETL | LDKVDKLFIG | GGMIFTFFKA | RGIGVGGSSLV | EEDKLDLAKK |
| 26Thermosynechococcus_elongatu  | SSKIGVIEAL | LEKVDKLLIG | GGMIFTFYKA | RGLNVGKSLV  | EEDKLELAKH |
| 21Microcystis_sp__T1-4_Bacteri  | SSKIGVIETL | LEKCDKLLIG | GGMIFTFYKA | RGLNVGGSLV  | EEDKLELAKS |
| 17Microcoleus_chthonoplastes_P  | SSKIGVIETL | LDKVDKLLIG | GGMIFTFYKA | RGLSVGKSLV  | EEDKLELAKS |
| 37Cyanothecce_sp__PCC_7425_Bact | SSKIGVIETL | LEKVDKLLLG | GGMIFTFYKA | RGLNVGKSLV  | EEDKLELART |
| 25Microcoleus_vaginatus_FGP-2_  | SSKIGVIEKL | LEKCDKLLLG | GGMVFTFYKA | RGLSVGKSLV  | EDDKLELAKS |
| 27Raphidiopsis_brookii_D9_Bact  | SSKIGVIETL | LEKCDKLIIG | GGMIFTFYKA | RGLNVGKSLV  | EQDKLELASS |
| 16Fischerella_sp__JSC-11_Bacte  | SSKIGVIETL | LEKCDKLIIG | GGMIFTFYKA | RGLSVGKSLV  | EEDKLELAKS |

## 251

|                                |             |            |             |            |            |
|--------------------------------|-------------|------------|-------------|------------|------------|
| 108Aureococcus_anophagefferens | LIAKAKAKGV  | NFLLPTDVVV | ADKFAADANY  | KVVPVDGIPD | GWLGLDVGPA |
| 156Phytophthora_capsici_Locald | ILKEAQKRGV  | QIVLPTDVVI | ADKFEADAQS  | KVVSANAIPA | DWLGLDIGPD |
| 162Schizochytrium_limacinum_Lo | ILEEAKQKRGV | QIVLPTDVVV | ADKFEADAQS  | KVVPANAIPA | DWLGLDIGPD |
| 18Phaeodactylum_tricornutum_CC | VLAKAEKLGK  | EILLPIDIVI | ADKFDAAEAT  | KVVSAAEIPD | GWMGLDNGPE |
| 22Thalassiosira_pseudonana_CCM | VLAKAEKLGK  | EILLPSDIVI | ADKFAADAET  | KVSSDAIPD  | GWMGLDNGPA |
| 24Thalassiosira_pseudonana_CCM | VLAKAEKLGK  | KILLPCDIVV | ADKFAADAET  | KIVATDEIPD | GWMGLDNGPA |
| 02Galdieria_sulphuraria        | IEQMAAQKKV  | ELIFPLDLLV | ADKFDNHANV  | KTVSFSQIEE | GWMGLDIGPA |
| 49Cyanidioschyzon_merolae_Euka | IEEEARKRGI  | ELLLPLDVVV | ADKFANDANT  | KVVPVEEIPD | GWMGLDNGPE |
| 13Physcomitrella_patens_subsp_ | LVALAKKKGV  | ELILPVDVTA | ADKFSPEANT  | QVCSASNIPA | GWMGLDIGPK |
| 120streococcus_lucimarinus_CCE | LMAKAEAKGV  | KILLPTDVVV | ADKFAEADAKT | QIVSVDNIPD | GWMGLDIGPD |
| 14Micromonas_pusilla_CCMP1545_ | LMAKAEKKGV  | KILLPTDVVV | ADAFADAET   | QTVSVDDIPE | GWMGLDIGPD |
| 01Cyanophora_paradoxa          | LEEVAKAKGV  | EILLPTDVLL | ADKFDPEANT  | QVVDADKIPD | GWMGLDIGPK |
| 10Volvox_carteri_f__nagariensi | LEAIKAKAGV  | QLLLPSDVVV | ADKFDANANT  | QTVSVEAIPD | GWMGLDIGPD |
| 11Chlamydomonas_reinhardtii_Eu | LEEMAKAKGV  | QLLLPTDVVV | ADKFDANANT  | QTVPIAIPD  | GWMGLDIGPD |
| 08Ectocarpus_siliculosus       | LEEKAKTAGV  | EIILPSDVVV | ADAFADAET   | QVVKADAIPD | GWMGLDNGPE |
| 09QUERY_jgi_Bignal_92730_estEx | LERIAKEKGV  | ELILPTDVVL | ADAFADANT   | QVADATAIPE | GWMGLDQGP  |
| 99Lth_pgk_92730                | LERIAKEKGV  | ELILPSDVIL | ADAFADANT   | QVADASAIPD | GWMGLDQGP  |
| 07Guillardia_theta_CCMP2712    | LEKAAEKGV   | KFILPTDVVL | ADKFAADANT  | KVASVSDIPD | GWMGLDNGPE |
| 05Ectocarpus_siliculosus       | LEKTAASKGV  | EIILPTDVVL | ADAFADANT   | QVASVDAIPD | GWMGLDNGPD |
| 03Isochrysis_galbana           | LEVIAKEKGI  | DFILPTDVIV | ADKFAADAAT  | QIVSVDAIPE | GWMGLDNGPE |
| 157Pyropia_zezoensis_Localdb__ | LEEIAAKKGV  | KIILPVDVVA | ADKFAPDAKT  | QLVSVDAIPD | DTMGLDQGP  |
| 06Pyropia_zezoensis            | LEEIAAKKGV  | KIILPVDVVA | ADKFAPDAKT  | QLVSVDAIPD | DTMGLDQGP  |
| 04Chondrus_crispus             | LVKTAEAKGV  | SIILPTDVVL | ADKFAADANT  | QVTSVDSIPD | GWMGLDQGED |

30Synechococcus\_sp\_\_JA-3-3Ab\_B LMEKAKARGV ELLLPTDVVV ADRFDKDANA QTVSIHAIPE DWMGLDIGPE  
34Synechococcus\_elongatus\_PCC\_ LMAKAQEKGV QLLLPTDVVV ADKFAPDANA KTVAIDAIPD GWMGLDIGPE  
23Synechococcus\_sp\_\_PCC\_7335\_B LEAKAKEKGV EFLLPTDVIV ADKFAADANT QTVSVENIPD GWMGLDIGPD  
26Thermosynechococcus\_elongatu LETKAQEKGV ELLLPTDVVV ADNFAADANS QVVSIEAIPD DWMGLDIGPA  
21Microcystis\_sp\_\_T1-4\_Bacteri LEAKAKEKGV EFLLPTDVVL ADKFDKDAKS QIVKVENIPD GWMGLDIGPD  
17Microcoleus\_chthonoplastes\_P LEAKAKEKGV DLLLPTDVVV ADNFAADANS QTVSVESIPD GWMGLDIGPD  
37Cyanothecce\_sp\_\_PCC\_7425\_Bact LEAKAKERGV ALLLPTDVVV ADAFAADANA QTVSVESIPD GWMGLDIGPD  
25Microcoleus\_vaginatus\_FGP-2\_ LEAKAKERGV TFLLPTDVVV ADKFAADANT QTVSVENIPE GWMGLDIGPD  
27Raphidiopsis\_brookii\_D9\_Bact LEKAAAERGV TLLLPTDIVA ADKFAPDADA VTVSIENIPD DRMGLDIGPK  
16Fischerella\_sp\_\_JSC-11\_Bacte LEAKAKEKGV TFLLPTDVVV ADNFAADANS QTVSIENIPD GWMGLDIGPD

## 301

108Aureococcus\_anophagefferens TQATFSATAA ASTTVVWNGP MGVFEFDFAPS KGTFGVADAL AAN--ESAIT  
156Phytophthora\_capsici\_Locald SQAAFAKELK ECKTVVWNGP MGVFEFPEFA KGTFGVAKAL AESTETGVTT  
162Schizochytrium\_limacinum\_Lo SQATFAKELK ECKTVVWNGP MGVFEFPEFA KGTFGVAKAL AESTESGVTT  
18Phaeodactylum\_tricornutum\_CC TTAQQKEALS DCKTIIMNGP MGVFEFEKFA KGTFDLVNIL ADLSKKGAIT  
22Thalassiosira\_pseudonana\_CCM STAEQKEFLS DCQTVIMNGP MGVFEMKAFE KGTFGLVDIL ADLSKKGAIT  
24Thalassiosira\_pseudonana\_CCM STAEQKEFLS DCKTVIMNGP LGVFEMKAFE KGTMGIIDIL ADLTKKGAIT  
02Galdieria\_sulphuraria TIEMIESALA KCKTILWNGP MGVFEMENFA RGTFQVARIL AKLTEQGAIT  
49Cyanidioschyzon\_merolae\_Euka TTRMIQEKLK TMKTVLWNGP LGVFEMPNFA KGTFIAIETL AEITQNGCIT  
13Physcomitrella\_patens\_subsp\_ AIDQFQDALK GAKTVLWNGP MGVFEFEKFA DGTAVAKTL AGLTKEGAIT  
120streococcus\_lucimarinus\_CCE SLKAFQGELN ECKSVIWNGP MGVFEMDAFA KGTFGIADTL ANLNG---IT  
14Micromonas\_pusilla\_CCMP1545\_ SVKSFQDELN ECKSVIWNGP MGVFEMDAFA KGTFIAIADTL ANLDG---IT  
01Cyanophora\_paradoxa SIESFSKALS DAKTVIWNGP MGVFEFDKFA KGTFIAIADLL AELTPKGCKT  
10Volvox\_carteri\_f\_nagariensi SIKTFQDALA DAKTVVWNGP MGVFEFPPKFA VGTVAIANTL SELTPKGAIT  
11Chlamydomonas\_reinhardtii\_Eu SVKTFNDALA DAKTVVWNGP MGVFEFPPKFA NGTVSIANTL AGLTPKGCIT  
08Ectocarpus\_siliculosus ATKEIQALK ECKTVVWNGP MGVFEYEAF A KGTFIAIADTL AEITSEGCTT  
09QUERY\_jgi\_Bignal\_92730\_estEx ATEEIIAALK DCKTVIWNGP MGVFEFEAFS KGTFGVADAL ADLTKGGATT  
99Lth\_pgk\_92730 ATEEIVKALG ECKTVIWNGP MGVFEFEKFA AGTMDVANAL AKLTKDGATT  
07Guillardia\_theta\_CCMP2712 STKMIQKELS DCNTIIWNGP MGVFEFEKFA KGTDNVAKTL AECTSKGAIT  
05Ectocarpus\_siliculosus STSLIQGKLA DCKTVIWNGP MGVFEYEAF A K--FGVGENL GAAPGKGWLT  
03Isochrysis\_galbana STKMIQQKLS ECKTIIWNGP MGVFEFEAF A KGTFDVADTL AELTGKGCTT  
157Pyropia\_yezoensis\_Localdb\_\_ STELINAELA DCKTVLWNGP AGVFEFDFA TGTYAIANTL AEVTANGATT  
06Pyropia\_yezoensis STELINAELA DCKTVLWNGP AGVFEFDFA TGTYAIANTL AEVTANGATT  
04Chondrus\_crispus STKLIQNELK ECKTVIWNGP MGVFEMEKF A KGTFIAIADTL ADLTESGCIT  
30Synechococcus\_sp\_\_JA-3-3Ab\_B SVKAFQAALQ GCKTVVWNGP MGVFEFDRFA AGTEAIARTL ADLTQAGAIT  
34Synechococcus\_elongatus\_PCC\_ SVKQFEGALA DCRSVIWNGP MGVFEFDQFA VGTEAIARSL AGLTRKGATT  
23Synechococcus\_sp\_\_PCC\_7335\_B SVKTFQDALA DCKSVIWNGP MGVFEMEAF A KGTGTIATTL AGLTDKGCIT  
26Thermosynechococcus\_elongatu SVKRFQALQ DCKTVIWNGP MGVFEFDQFA KGTEAIARYL AELTSQGVCT  
21Microcystis\_sp\_\_T1-4\_Bacteri SVKVFQKALS SCKSVLWNGP MGVFEFDKFA AGTDIAHTL ADLTATGTTT

|    |                                     |            |          |    |            |            |            |
|----|-------------------------------------|------------|----------|----|------------|------------|------------|
| 17 | <i>Microcoleus_chthonoplastes_P</i> | SVKFFQDALG | DCKSVIWN | MP | MGVFEFDKFA | AGTEAIARTL | ADLTKKGT   |
| 37 | <i>Cyanothece_sp__PCC_7425_Bact</i> | AVKTFQEALS | DCKTVIWN | MP | MGVFEFDKFA | VGTEAIAHSL | AGLTGKGAST |
| 25 | <i>Microcoleus_vaginatus_FGP-2_</i> | SVKTFQDALA | DCKTVIWN | MP | MGVFEMEKF  | AGTEGIAHSL | AGITKTGT   |
| 27 | <i>Raphidiopsis_brookii_D9_Bact</i> | SVKLFQDALA | DCKTVIWN | MP | MGVFEFDKFA | VGTEAIAQTL | AEIGKTGATT |
| 16 | <i>Fischerella_sp__JSC-11_Bacte</i> | SVKLFQEALA | DCKTVVWN | MP | MGVFEFDKFA | VGTEAIARTL | ADLSKNGATT |

## 351

|     |                                      |            |            |            |           |          |
|-----|--------------------------------------|------------|------------|------------|-----------|----------|
| 108 | <i>Aureococcus_anophagefferens</i>   | IIGGGDSVAA | VEKAGLADKM | SHISTGGGAS | LELLEKVL  | GVAALDDA |
| 156 | <i>Phytophthora_capsici_Locald</i>   | IVGGGDSVAA | VEQAGLGSKM | SHISTGGGAS | LELLEKVL  | GVAALNDA |
| 162 | <i>Schizochytrium_limacinum_Lo</i>   | IVGGGDSVAA | VEQAGLGSKM | SHISTGGGAS | LELLEKVL  | GVAALNDA |
| 18  | <i>Phaeodactylum_tricornutum_CC</i>  | IIGGGDSVAA | TEQSGRAGDM | SHISTGGGAS | LELLEKVL  | GVAALNDK |
| 22  | <i>Thalassiosira_pseudonana_CCM</i>  | IIGGGDSVAA | TELSGRAGDM | SHISTGGGAS | LELLEKVL  | GVAALNDK |
| 24  | <i>Thalassiosira_pseudonana_CCM</i>  | IIGGGDSVAA | TEQSGRAKDM | SHISTGGGAS | LELMKVL   | GVAALDEK |
| 02  | <i>Galdieria_sulphuraria</i>         | IIGGGDSVAA | VEKANLADKM | SHISTGGGAS | LELIEGRVL | GVAALDDA |
| 49  | <i>Cyanidioschyzon_merolae_Euka</i>  | IVGGGDSVAA | MEQSGKADKV | SHISTGGGAA | LELIEGRVL | GVAALQRA |
| 13  | <i>Physcomitrella_patens_subsp_</i>  | IIGGGDSVAA | VEKAGLADQM | SHVSTGGGAS | LELLEKVL  | GVAALDNA |
| 120 | <i>Streptococcus_lucimarinus_CCE</i> | IIGGGDSVAA | VEKAGLADKM | SHISTGGGAS | LELLEKVL  | GVAALDEA |
| 14  | <i>Micromonas_pusilla_CCMP1545_</i>  | IIGGGDSVAA | VEKAGLADKM | SHISTGGGAS | LELLEKVL  | GVAALDEA |
| 01  | <i>Cyanophora_paradoxa</i>           | IIGGGDSVAA | VEKAGLAEKM | SHISTGGGAS | LELLEKVL  | GVAALDDA |
| 10  | <i>Volvox_carteri_f__nagariensi</i>  | IIGGGDSVAA | VEQAGVAEKM | SHISTGGGAS | LELLEKVL  | GVAALDEK |
| 11  | <i>Chlamydomonas_reinhardtii_Eu</i>  | IIGGGDSVAA | VEQAGVAEKM | SHISTGGGAS | LELLEKVL  | GVAALDEK |
| 08  | <i>Ectocarpus_siliculosus</i>        | IVGGGDSVAA | VEKANLADKM | SHISTGGGAS | LELLEKVL  | GVAALNDA |
| 09  | QUERY_jgi_Bignal_92730_estEx         | IIGGGDSVAA | VEQAGLADQM | SHISTGGGAS | LELLEKVL  | GVAALNAA |
| 99  | Lth_pgk_92730                        | IIGGGDSVAA | VEKAKVADQM | SHISTGGGAS | LELLEKVL  | GVAALNAK |
| 07  | <i>Guillardia_theta_CCMP2712</i>     | IIGGGDSVAA | VEKAGLADKM | SHISTGGGAS | LELLEGLVL | GVAALTDA |
| 05  | <i>Ectocarpus_siliculosus</i>        | IIGGGKSVG  | VEKAGLADKM | SHISTGGGAS | LELLEKVL  | GVAALD-- |
| 03  | <i>Isochrysis_galbana</i>            | IIGGGDSVAA | VEKAGLAEKM | SHISTGGGAS | LELLEKVL  | GVAALQEA |
| 157 | <i>Pyropia_yezoensis_Localdb__</i>   | IIGGGDSVAA | VEKAGLAEKM | SHISTGGGAS | LELLEKVL  | GVAALDDQ |
| 06  | <i>Pyropia_yezoensis</i>             | IIGGGDSVAA | VEKAGLAEKM | SHISTGGGAS | LELLEKVL  | GVAALD-- |
| 04  | <i>Chondrus_crispus</i>              | IIGGGDSVAA | VEKAGLAEKM | SHISTGGGAS | LELLEKVL  | GVAALD-- |
| 30  | <i>Synechococcus_sp__JA-3-3Ab_B</i>  | IIGGGDSVAA | VEKVGLADKM | THISTGGGAS | LELLEKEL  | GIAALSEA |
| 34  | <i>Synechococcus_elongatus_PCC_</i>  | IIGGGDSVAA | VEKVGVAEM  | SHISTGGGAS | LELLEKVL  | GVAALDDA |
| 23  | <i>Synechococcus_sp__PCC_7335_B</i>  | IIGGGDSVAA | VEQAGLADKM | SHISTGGGAS | LELLEKTL  | GIAALDEA |
| 26  | <i>Thermosynechococcus_elongatu</i>  | IIGGGDSVAA | VEKVGVADRM | SHISTGGGAS | LELLEKQL  | GIAALDDA |
| 21  | <i>Microcystis_sp__T1-4_Bacteri</i>  | IIGGGDSVAA | VEKVGVAEKM | SHISTGGGAS | LELLEKVL  | GIAALDEA |
| 17  | <i>Microcoleus_chthonoplastes_P</i>  | IIGGGDSVAA | VEKVGVAEQM | SHISTGGGAS | LELLEKVL  | GIAALDDA |
| 37  | <i>Cyanothece_sp__PCC_7425_Bact</i>  | IIGGGDSVAA | VEKVGVAEQM | SHISTGGGAS | LELLEKEL  | GIVALDDA |
| 25  | <i>Microcoleus_vaginatus_FGP-2_</i>  | IIGGGDSVAA | VEQLNLGEQM | SHISTGGGAS | LELLEKDL  | GVAALDEA |
| 27  | <i>Raphidiopsis_brookii_D9_Bact</i>  | IIGGGDSVAA | VEKVGLADQM | SHISTGGGAS | LELLEGLVL | GIAALDEA |
| 16  | <i>Fischerella_sp__JSC-11_Bacte</i>  | IIGGGDSVAA | VEKVGLADQM | SHISTGGGAS | LELLEKVL  | GIAALDEA |

8-pgk. txt

## Alignment: PS2SAF

|    |                                       |            |             |            |             |            |
|----|---------------------------------------|------------|-------------|------------|-------------|------------|
| 39 | <i>Synechococcus</i> _sp__JA-2-3Ba_2  | MVPWQQVEVP | TQNILLDIAF  | TTPSHGWLVG | DKATLLESRD  | GGLHWQVREL |
| 12 | <i>Cyanophora</i> _paradoxa_Eukaryot  | TK-WEQIPLN | TDEILLDIGF  | VQPQRGWLLG | TRSTLFETTD  | KGKTWELRSL |
| 21 | <i>Synechococcus</i> _elongatus_PCC_  | ESPWQVIDLG | TEKTILDIAF  | TNKQHGWLVG | TDLALYETLD  | GEQSWSERAL |
| 15 | <i>Thermosynechococcus</i> _elongatu  | INPWEAIQLP | TTATILDMSF  | IDRHHGWLVG | VNATLMETRD  | GGQTWEPRTL |
| 35 | <i>Acaryochloris</i> _sp__CCMEE_5410  | -LSWETVALP | TDSTVLDVSF  | A-PDHGWLVG | TNSALLETFD  | GGKSWEQRPL |
| 24 | <i>Leptolyngbya</i> _sp__PCC_7375_Ba  | LNPWQMIALE | TDATFSDVAF  | TDASHGWLVG | SRTSLFETND  | GGETWQQRTL |
| 34 | <i>Leptolyngbya</i> _sp__PCC_6406_Ba  | LNPWEVISLE | TEATFSDIAF  | TDPHGWLVG  | SRTTLLETTD  | GGKTWEPRSL |
| 32 | <i>Dactylococcopsis</i> _salina_PCC_  | VNPWRVLNLP | TEETMLDLAF  | TDPNHGWMVG | NQATLLETTD  | GGETWERKEL |
| 18 | <i>Chamaesiphon</i> _minutus_PCC_660  | ISPWKPIQLP | TESNIQDLTF  | TNPQHGWVVG | SDAAILETND  | GGKTWENRKL |
| 31 | <i>Gloeocapsa</i> _sp__PCC_73106_Bac  | LNPWKMIQLP | TEATFADVAF  | TDPKHGWLVG | TKATLFETKD  | AGETWTPVVI |
| 22 | <i>Cyanobacterium</i> _aponinum_PCC_  | LNPWQLISLD | AESTFADIDF  | TDSNHGWLVG | TRATLFETKD  | GGDNWQQKII |
| 28 | <i>Microcystis</i> _aeruginosa_DIANC  | MSPWQILTLD | TDSTFADIAF  | TDLQHGWLVG | TKSTLFETSD  | GGDSWQQKVL |
| 19 | <i>Stanieria</i> _cyanosphaera_PCC_7  | LNPWQIKTLP | TEAILS DIAF | TNSNHGWLVG | TQASLFETTD  | GGNTWQQKVL |
| 17 | <i>Pleurocapsa</i> _sp__PCC_7327_Bac  | VNPWSVIQLE | TESTFADLAF  | TDPNHGWLVG | SQAALFETTD  | GGKTWQEKKL |
| 27 | <i>Cyanothece</i> _sp__PCC_7822_Bact  | VNPWKLINLE | TESTFADVAF  | TDPNHGWIVG | TQATLFETTD  | GGDNWEERKL |
| 13 | <i>Geitlerinema</i> _sp__PCC_7407_Ba  | LSPWRSVSLP | EDITLLDIAF  | ANSQHGWLVG | SRSTLLETQD  | GGTTWDAKVL |
| 33 | <i>Calothrix</i> _sp__PCC_6303_Bacte  | LNPWKVISVD | ADTKLLDIAF  | ANQEHGFMVG | SNATLLETKD  | AGETWEAIKL |
| 29 | <i>Rivularia</i> _sp__PCC_7116_Bacte  | VNPWEVISLP | TDSKLF DIAF | TDPNHGFIVG | NKATLLETKD  | AGETWNPIVL |
| 36 | <i>Nodularia</i> _spumigena_CCY9414_  | VNPWAIISVP | TDSKLLDIAF  | TNSQHGFVLG | GDATLLETND  | GGDTWKPLTL |
| 14 | <i>Fischerella</i> _sp__JSC-11_Bacte  | VNPWEVISVD | TDAKLLDIAF  | TNPQHGFVLG | SNATLLETKD  | GGETWQPIKL |
| 23 | <i>Scillatoriales</i> _cyanobacteri   | LNPWQVVTVP | TESNLLDIAF  | VDSSHGWVVG | ANASLFETTD  | NGETWQERTL |
| 25 | <i>Scillatoria</i> _nigro-viridis_P   | INPWQVISLP | TEANLQDIAF  | TNPQHGWVVG | SEATLLETLD  | GGTSWKSIAL |
| 38 | <i>Scillatoria</i> _sp__PCC_6506_Ba   | INPWKVPLP  | TKANLQDVAF  | TNPQHGWIVG | SDTTLLETKD  | GGENWQAIAL |
| 20 | <i>Crinalium</i> _epipsammum_PCC_933  | VSPWQVINVP | TQATLADIAF  | TDSNHGWLVG | SDSTLVETTD  | GGKTWQVRRV |
| 30 | <i>Synechocystis</i> _sp__PCC_7509_B  | VNPWQVLTVP | SEANFQDITF  | TDSQHGWLVG | SKSTILETHD  | GGESWQQVSL |
| 16 | <i>Gloeocapsa</i> _sp__PCC_7428_Bact  | TNPWKVITVP | TESNLQDIAF  | TDT-HGWLVG | SKAALLETTD  | GGETWQPRTL |
| 26 | <i>Chroococciopsis</i> _thermalis_    | VNPWEVVTLP | TDVNLQDVGF  | TDTQHGWLVG | NKSALFETKD  | GGKTWQQKSL |
| 08 | <i>Streptococcus</i> _lucimarinus_CCE | ESYWEQVELP | LEPILLDIAF  | SDPKHGFLLG | TRQTVLETKD  | GGKTWDVRDL |
| 09 | <i>Micromonas</i> _pusilla_CCMP1545_  | -KFWEQVDLP | LEPILLDIAF  | EDPNHGFLLG | TRQTILETFD  | GGKTWDFKAI |
| 10 | <i>Chlamydomonas</i> _reinhardtii_Eu  | -----      | -----       | -NPTKGFLLG | TRQTILETND  | GGKTWAPRSI |
| 07 | <i>Brachypodium</i> _distachyon_Euka  | ASEWQRVKLP | IDPVLLDIAF  | VDPSHGFLLG | TRQTILETKD  | GGNSWFPRSI |
| 06 | <i>Selaginella</i> _moellendorffii_E  | ASQWEKVPLP | IDPVLLDLSF  | VEPNRGFLLG | TRQTILETKD  | GGRSWSPRS  |
| 11 | <i>Physcomitrella</i> _patens_subsp_  | LSSWEQVPLP | VDPVLLDMAF  | VQPDRGFLLG | TRQTILETKD  | AGRSWSPRS  |
| 48 | <i>Cyanidioschyzon</i> _merolae_Euka  | GAAWKQVPLP | TESVLFIDIF  | SDPNHGWLVG | TRGLVLETRD  | GGETWEPRAF |
| 67 | <i>Ectocarpus</i> _siliculosus_Local  | TSAWEQIQLP | VASVLYDIAF  | DHPDHGLVVG | AQGTFLLETFD | GGYKWSVRTF |
| 65 | <i>Aureococcus</i> _anophagefferens_  | IKNWERVSLP | VSTTLFDIAF  | -TDTHGYLVG | AKGTFLLETVD | GGKNWKPRTF |
| 03 | <i>Phaeodactylum</i> _tricornutum_CC  | SQWWSKVPLP | FEDTLFDIDF  | -SPTHGYLVG | ARGAFAETND  | GGKTWEARSF |
| 05 | <i>Thalassiosira</i> _pseudonana_CCM  | SRQWRQVKVP | FEDTVYDIDF  | -SPTHGYIVG | ARGSAFAETND | GGATWEPRSF |



|                                |            |            |            |            |            |
|--------------------------------|------------|------------|------------|------------|------------|
| 96Pyropia_yezoensis_Localdb_L  | PPSWEQVPLS | AETTLFDMSE | SDPNHGWLVG | SRGTVLETND | GGDSWKPRAF |
| 02Hemiselmis_andersenii_Eukary | SKKWEQVEIP | VDTVLFDLDF | VDPQHGWLVG | SKGTFLETTD | AGKTWIPRTF |
| 04Guillardia_theta_Eukaryota__ | NTSWTKVDLP | VDSVLFDFEF | TECKHGWLVG | SKGTFLETTD | GGNTWVPRTF |
| 68Emiliana_huxleyi_Localdb_L   | QPTWAPVQLP | LATILFDIEF | DNPKNGFIVG | NKGTFLQTTD | GGSSWQAKSF |
| 01QUERY_Bigel_p2saf_91760      | -----M     | QQLVLFDFEF | -DDKNGYLVG | SQGTFLRTND | GGKTWSNADL |
| 47Lotharella_amoeboformis_Euka | -----      | -----      | -----      | -----      | -----      |

51

|                                 |             |            |             |             |             |
|---------------------------------|-------------|------------|-------------|-------------|-------------|
| 39Synechococcus_sp__JA-2-3Ba_2  | PLEPEAY-LA  | SISFAGAEGW | VAGQPKILLH  | TLNEGSDWTS  | IRLNNQLPGE  |
| 12Cyanophora_paradoxa_Eukaryot  | NLEDDKYRLN  | SISFSGKEGW | VTGKPAILLH  | TTDGGSSWSR  | IPLSNQLPGD  |
| 21Synechococcus_elongatus_PCC_  | DLDET-YRLN  | SISFKGDEGW | VVGQPSMLLH  | TTDGGKNWLR  | IPLSEKLPGS  |
| 15Thermosynechococcus_elongatu  | VLDHSDYRFN  | SVSFQNEGW  | IVGEPPIMLH  | TTDGGQSWSQ  | IPLDPKLPGS  |
| 35Acaryochloris_sp__CCMEE_5410  | ALGDLDYRFS  | SISFSGDEGW | IVGEPSSILLH | TTDGGKSWSR  | VSLSTQLPGT  |
| 24Leptolyngbya_sp__PCC_7375_Ba  | DLGDQRYTFT  | SVSFVGDEGW | VSGLPSVLLH  | TTDGGKSWAN  | VPLSNQLPGS  |
| 34Leptolyngbya_sp__PCC_6406_Ba  | NLGDQRYTFT  | SVSFADQEGW | VAGQPSILLH  | TRDGGGSWEK  | VPLSEKLPGT  |
| 32Dactylococcopsis_salina_PCC_  | ELENEKLDLFL | SVSFVGEEGW | IAGEPSVLLH  | TKDGGGEHSR  | IPLSKKLPGE  |
| 18Chamaesiphon_minutus_PCC_660  | ELDSSKYRFT  | SISFAGDEGW | IVGEPAILLH  | TKDAGKSWER  | IALSSKLPGI  |
| 31Gloeocapsa_sp__PCC_73106_Bac  | DFGEEKISFT  | GISFYQQEGW | ITGDPLVLLH  | TTNGGKTWER  | VRLSAKLPGA  |
| 22Cyanobacterium_aponinum_PCC_  | DLGEEKVNFT  | GVSFYDNEGW | ITGMPSVLLH  | TNNGGETWER  | IPLSEKLPGS  |
| 28Microcystis_aeruginosa_DIANC  | NLGDEKVSFS  | AVSFHDQEGW | IVGKPSILLH  | SEDGGSSWSR  | IPLSEKLPGS  |
| 19Stanieria_cyanosphaera_PCC_7  | NLEDEKVSFS  | AISFAGEEGW | IVGKPSILLH  | TEDGGTTWSR  | IPLSSKLPGA  |
| 17Pleurocapsa_sp__PCC_7327_Bac  | DLGEEKASFT  | AVSFNGQEGW | ITGKPSILLH  | TEDGGQSWSR  | IPLSEKLPGA  |
| 27Cyanothecce_sp__PCC_7822_Bact | DLGEEKVSFD  | GVSFNGDEGW | ITGKPAILLH  | TEDGGQTWSR  | IPLSEKLPGA  |
| 13Geitlerinema_sp__PCC_7407_Ba  | DLDEAKYSLT  | SVSFAGKEGW | VVGQPSLLLH  | TTDEGKSWSQ  | VPLSEKLPGA  |
| 33Calothrix_sp__PCC_6303_Bacte  | SLDSEKSRFN  | GVSFAGKEGW | IVGEPALVLH  | STDAGKSWLQ  | IPLDEKLPGN  |
| 29Rivularia_sp__PCC_7116_Bacte  | QVGDENYRFN  | AIDFHGNEGW | IAAEPSILLH  | TSDEGKTWTS  | IPLSEKLPGN  |
| 36Nodularia_spumigena_CCY9414_  | ELDDPKSRFD  | SVSFAGKEGW | ILGEPSSLLLH | TTDEGSSWSR  | IALSEKLPGS  |
| 14Fischerella_sp__JSC-11_Bacte  | QLDEDKYRFN  | SVSFKGQEGW | IVGEPALLLH  | STDEGKSWLR  | IPLSEKLPGN  |
| 230scillatoriales_cyanobacteri  | ELDQP-YRFT  | SVSFYEQEGW | IVGQPSILLH  | TEDEGRSWSR  | IPLSEKLPGA  |
| 250scillatoria_nigro-viridis_P  | DIDDPRSRFA  | SVSFSGSEGW | IVGQPSVLLH  | TNDEGKSWTR  | IALSSQLPGS  |
| 380scillatoria_sp__PCC_6506_Ba  | NLEDARSRFS  | SVSFSGSEGW | IVGQPSVLLH  | TEDEGKSWTR  | IALSSQLPGS  |
| 20Crinalium_epipsammum_PCC_933  | DVDSQNYRFT  | SVSFAGDEGW | VTGEPAILLH  | TTDGGTSWSR  | IPLSNKLPGA  |
| 30Synechocystis_sp__PCC_7509_B  | DLDEKNNLFT  | SVSFDGDEGW | ITGEPSSILLH | TTDKGETWSR  | IPLSEKLP GK |
| 16Gloeocapsa_sp__PCC_7428_Bact  | DLGEQNYLFS  | SISFAGQEGW | IVGEPALLLH  | TTDGGKSWEQ  | IPLSEKLPGN  |
| 26Chroococcidiopsis_thermalis_  | DLGDKNFILS  | SVSFSGQEGW | IVGEPSSLLLH | TNDGGGETWSR | ILLSEKLPGN  |
| 080streococcus_lucimarinus_CCE  | SDDDVNYRFN  | SVSFCGDEGW | IIGKPAVLLH  | TTDGGANWER  | VGLSPRLPGA  |
| 09Micromonas_pusilla_CCMP1545_  | TDEDVNYRFN  | SITFKGKEGW | IVGKPAILLH  | TIDGGANWER  | IGLSPRLPGA  |
| 10Chlamydomonas_reinhardtii_Eu  | DDEGFNYRFN  | SISFAGKEGW | IVGKPAILLH  | TSDGGANWER  | IPLSSKLP GK |
| 07Brachypodium_distachyon_Euka  | PDEDFNYRFN  | SVSFMGKEGW | IVGKPAILLH  | TKDAGESWER  | IPLSAQLPGD  |
| 06Selaginella_moellendorffii_E  | AEEDFNYRFN  | SISFKGKEGW | IIGKPAVLLH  | TSNAGETWER  | IPLSSRLPGN  |

|                                |            |            |            |            |            |
|--------------------------------|------------|------------|------------|------------|------------|
| 11Physcomitrella_patens_subsp_ | PDEDFNYRFN | SISFQQQEGW | IIGKPAILLH | TSNGGESWER | IPLSIRLPGN |
| 48Cyanidioschyzon_merolae_Euka | EEEELNYSFS | NVSFSGDEAW | VIGKPPVMLR | STDGGKNWSR | ILLSPKLPGE |
| 67Ectocarpus_siliculosus_Local | GEEEINYRFQ | KVSMYNDEIF | IIGKPPILLH | SKDAGKTWER | VPLSPKLPGE |
| 65Aureococcus_anophagefferens_ | AEEEVGYRFE | KVSFQDGEW  | VVGKPPILLH | TVDAGKSWER | IPLSPKLPGE |
| 03Phaeodactylum_tricornutum_CC | SEEEVTYRFQ | VLSFKDGEW  | VLGKPTLLLH | TKDSGKTWER | IPLSPKLPGE |
| 05Thalassiosira_pseudonana_CCM | SEEEITYRFQ | VVSFNNGEGW | VLGKPTLLLH | TKDGGKTWER | IPLSPKLPGE |
| 96Pyropia_zezoensis_Localdb_L  | KDDEINYRFE | VVTFRGDEGW | VIGKPSLLIH | TRDGGVSWER | VPLSPKLPGD |
| 02Hemiselmis_andersenii_Eukary | ADEELTYRFE | NISFFQNDGW | VIGKPAILLH | TKDGGKTWLR | VPVSPKLPGE |
| 04Guillardia_theta_Eukaryota__ | ADEELTYRFE | NISFEGQEGW | VIGKPAIILY | TKDGGKTWFR | VPVSPKLPGE |
| 68Emiliana_huxleyi_Localdb_L   | ADEEINYRFT | KMSFRDGEW  | IIGKPAILLH | TRDSGASWER | VPLSPKLPGD |
| 01QUERY_Bigel_p2saf_91760      | SDDEIKYRWE | SVSFKDNEGW | AVGKPAIMVH | STDGGKSWER | IPFSSQLPGD |
| 47Lotharella_amoeboformis_Euka | -----      | -----      | -----      | -----      | -----      |

101

|                                |            |            |             |             |            |
|--------------------------------|------------|------------|-------------|-------------|------------|
| 39Synechococcus_sp__JA-2-3Ba_2 | PLLIQALGPG | AAEMVTNVGA | IYRTEDGGQT  | WHAQVDEPIG  | AIKNIARGPE |
| 12Cyanophora_paradoxa_Eukaryot | PALITALGTG | KAELATDIGA | IYRTENSGQT  | WKAQIQEPLG  | VIRTVARSEN |
| 21Synechococcus_elongatus_PCC_ | PLLVTALGKG | EAEMATDVAA | IYRSRDGGKS  | WQAQVPDAAG  | VARSVSRSD  |
| 15Thermosynechococcus_elongatu | PRLIKALGNG | SAEMITNVGA | IYRTKDSGKN  | WQALVQEAIQ  | VMRNLNRSPS |
| 35Acaryochloris_sp__CCMEE_5410 | PYQVTALGPK | SVEMITDLGA | IYRTQDEAQH  | WTALVEEATG  | ATRNINRSED |
| 24Leptolyngbya_sp__PCC_7375_Ba | PLMVTALAKG | AVELATDVGA | IYRTEDSGRH  | WSALVQAAVG  | VVRNMTRSED |
| 34Leptolyngbya_sp__PCC_6406_Ba | PFMVTALKAN | EVELATDVGA | IYRTKDGKKN  | WKALVLGAVG  | VVRNMTRSED |
| 32Dactylococcopsis_salina_PCC_ | PYSIIAKGED | TAEMTTNVGA | IYETTTGGKN  | WQALVQEAVG  | VARNISRSPD |
| 18Chamaesiphon_minutus_PCC_660 | PATIKAIKEN | SAEMTTDIGA | IYATQDAGKN  | WKSLSVSGAVG | VFRTINRSPE |
| 31Gloeocapsa_sp__PCC_73106_Bac | PYGIIALGPK | SAEMVTKLGA | IYKTVDGGQN  | WKALVEGSVG  | VARTLNRSFN |
| 22Cyanobacterium_aponinum_PCC_ | PYDITALDDQ | TAEMVTNLGA | IYKTDDGGKT  | WKALVEGAVG  | VARSITRSAD |
| 28Microcystis_aeruginosa_DIANC | PYGIIALNDK | TAEMVTDLGA | IYRTKDGKKT  | WQALVEGAVG  | VARTIVRSHD |
| 19Stanieria_cyanosphaera_PCC_7 | PDGIVALGTA | SAEMVTDLGA | IYKTDDGGKT  | WKALVEGAVG  | VARHINRSAD |
| 17Pleurocapsa_sp__PCC_7327_Bac | PNGIVALGSK | MAEMVTDLGA | IYKTSNGGRT  | WQALVEGAVG  | VARTIARSAD |
| 27Cyanotheca_sp__PCC_7822_Bact | PYNIVALAPQ | TAEMVTDLGA | IYRTDDGGRT  | WKALVEGAVG  | VARNIRRSSD |
| 13Geitlerinema_sp__PCC_7407_Ba | PQVITALGPN | SAELTTNVGA | IYRTQDGGKN  | WKALVQEAVG  | VFRNISRSSD |
| 33Calothrix_sp__PCC_6303_Bacte | PINIAALSGN | TAEMATDVGA | IYQTSDDGGKN | WKAQVQDAVG  | VVRNITRSPD |
| 29Rivularia_sp__PCC_7116_Bacte | PVNIVAFGDN | KAEMATDVGA | IYKTEDGGKN  | WKAQVAESVG  | VVRNIERSED |
| 36Nodularia_spumigena_CCY9414_ | PIAIYALGEN | TAEMATDVGA | IYRTQDGGIN  | WKAQVEGAVG  | VVRNIERSPD |
| 14Fischerella_sp__JSC-11_Bacte | PISIIAQGAN | SAEMATDVGA | IYKTDDGGQN  | WKAQVEEAVG  | VVRNLERSAD |
| 23Oscillatoriales_cyanobacteri | PNTIEALGPQ | SAEMTTNIGA | IYRTSDGGKT  | WKAMVEEAVG  | VVRNISRSPN |
| 25Oscillatoria_nigro-viridis_P | PSTIAALGPN | SAQMTTDVGA | IYRTSDGGKN  | WKAQVQDSFG  | VVRNINRSED |
| 38Oscillatoria_sp__PCC_6506_Ba | PSTIVALGPQ | SAEMTTDVGA | IYQTADGGKT  | WKALVQEAFG  | VVRNINRSPD |
| 20Crinalium_epipsammum_PCC_933 | PNTILALDSN | SAEMTTNVGA | IYRTSDGGRT  | WQALVQDALG  | VVRNISRSPD |
| 30Synechocystis_sp__PCC_7509_B | PDTIIALGAS | SAEMTTDVGA | IYRTDDGGKN  | WKAMVQEAVG  | VVRNIERSDD |
| 16Gloeocapsa_sp__PCC_7428_Bact | PNTIVALGSH | AAEMTTDVGA | IYRTDSDGKT  | WKAMVQEAVG  | VVRNIARAAD |

|    |                               |            |            |            |            |             |
|----|-------------------------------|------------|------------|------------|------------|-------------|
| 26 | Chroococcidiopsis_thermalis_  | PNTIVALGQQ | SAEMTTDVGA | IYRTTDGGKN | WKAMVQEAVG | VLRNVARSED  |
| 08 | Streptococcus_lucimarinus_CCE | PVLITAVQDQ | TAEMVTDEGA | IYFTKDAARN | WKAAVEETVG | TFSTISRNDN  |
| 09 | Micromonas_pusilla_CCMP1545_  | PVLITAVSDG | VAELVTDEGA | IYLTTDTARN | WKAAVEETIG | TLSTIARNPD  |
| 10 | Chlamydomonas_reinhardtii_Eu  | GVVLDLAPG  | QAEMITDQGA | IYVTDNTAYT | WTAAVQETVG | SFSNLARSSS  |
| 07 | Brachypodium_distachyon_Euka  | MVYIQATGEQ | SAEMVTDEGA | IYVTSNRGYN | WKAAVQETVG | TFNTVNRSPD  |
| 06 | Selaginella_moellendorffii_E  | PVVIQATGDK | QAEMVTDEGA | IYVTSNAGYN | WKAAVEETVG | TFNTVNRSPQ  |
| 11 | Physcomitrella_patens_subsp_  | PITIRGTGPD | SAEMVTDEGA | IYVTSNKGYN | WKAAVEETVG | TLNTVNRSPA  |
| 48 | Cyanidioschyzon_merolae_Euka  | PLLVTALGPN | CAEMVTSSGA | IYVTENGGIN | WKALVRETIG | SIVSVSRDVH  |
| 67 | Ectocarpus_siliculosus_Local  | PSNIVALGGA | KAEMTTSSGA | IYYTKNAGMN | WSAQVKETVG | SIIGTTTRAED |
| 65 | Aureococcus_anophagefferens_  | PTGVVALGKS | KAEMTTSTGA | IYSTTNAGR  | WKAQVKETIG | SVATIQRKED  |
| 03 | Phaeodactylum_tricornutum_CC  | PTAIVALGPS | RAEMTTSSGA | VYVTDNAGR  | WKAQVKETIG | SIINQVRDDL  |
| 05 | Thalassiosira_pseudonana_CCM  | PTGILATGPN | SAEMITSSGA | VYTTENAGR  | WKAQVKETIG | SIVNEQRDSK  |
| 96 | Pyropia_yezoensis_Localdb_L   | PVLITALDKE | KAEMTTTAGA | VYLTENGGRN | WKALVKETIG | TIISVLRDGG  |
| 02 | Hemiselmis_andersenii_Eukary  | PILITALGPD | TAEMTTSAGA | IYVTNNGGRN | WKAQVKETIG | NIIGVIRDKN  |
| 04 | Guillardia_theta_Eukaryota_   | PCLIKALGSE | SAELTTTSGA | IYVTNAGR   | WKAQVKETIG | NVINVIRNSE  |
| 68 | Emiliana_huxleyi_Localdb_L    | PYNVALGPG  | KAEMSTSAGA | IYTTDNSGRN | WKAQVRETIG | SINDIQRDAD  |
| 01 | QUERY_Bigel_p2saf_91760       | FLGVTALGDG | QAETITNAGG | IYRTVNAGKN | WKAQVLETIG | SINSVVRDNM  |
| 47 | Lotharella_amoebiformis_Euka  | -----      | ---VITSAGA | IYKTVNGGKN | WKAQVVETIG | SINSVVRDTK  |

## 151

|    |                              |            |            |            |            |            |
|----|------------------------------|------------|------------|------------|------------|------------|
| 39 | Synechococcus_sp__JA-2-3Ba_2 | GEYLAVSSRG | SFYFLYTPES | RTWKPYPRES | SRRIQNMFGF | PHGSAWKLNQ |
| 12 | Cyanophora_paradoxa_Eukaryot | GSYVAVSAKG | NFYSTWKEGD | DKWISHPRQS | SRRIQSMGFT | NNNRLWMLTR |
| 21 | Synechococcus_elongatus_PCC_ | GRYLAVSARG | NFYSTWKPGD | TTWTPHQRTS | SRRLQLMGFG | PDDRTWLIAR |
| 15 | Thermosynechococcus_elongatu | GEYVAVSSRG | SFYSTWEPGQ | TAWEPHNRRT | SRRLHNMGFT | PDGRLWMIWN |
| 35 | Acaryochloris_sp__CCMEE_5410 | GKYVAISSRG | SFYTTFDPSE | TSWQSHDRNG | ARRIQTMGFD | PNGNPWILNK |
| 24 | Leptolyngbya_sp__PCC_7375_Ba | GRYVAVSSRG | NFYSTWEPGQ | DSWQPHNRN  | SKRLQNMGFT | SDGDLWLIAR |
| 34 | Leptolyngbya_sp__PCC_6406_Ba | GSYVAVSSRG | NFYSTWTPGE | LDWEPHNRQN | SRRLQNIQFD | KSGGLWLIAR |
| 32 | Dactylococcopsis_salina_PCC_ | GKYITVSARG | NFYSTWTPGD | QAWQAHERNT | SRRVQNMGFT | PDGRVWLLAR |
| 18 | Chamaesiphon_minutus_PCC_660 | GKYVAVSAKG | NFYSTWAPGQ | ESWEPHNRNS | SRRVSNMGFA | DDDLRWMLAR |
| 31 | Gloeocapsa_sp__PCC_73106_Bac | GEYVAVSARG | NFYSTWEPGQ | AEWTPHDRTS | SRRLQNMGFG | KDGRLWLLAR |
| 22 | Cyanobacterium_aponinum_PCC_ | GKYVAVSARG | NFYSTWQPGD | TEWTPHQRTS | SRRLQNMGFL | DGGRLWLIAR |
| 28 | Microcystis_aeruginosa_DIANC | GKYVAVSARG | NFYSTWEPGS | TEWQPHNRNS | SRRLQKVGYG | EKGELWALAR |
| 19 | Stanieria_cyanosphaera_PCC_7 | GKYVAVSARG | NFYSTWEPGQ | TEWTPHQRTS | SRRLQNMGFN | SDDSLWLLAR |
| 17 | Pleurocapsa_sp__PCC_7327_Bac | GKYVAVSARG | NFYSTWEPGQ | TEWTPHNRNS | SRRLQTMGYS | EDGRLWLLAR |
| 27 | Cyanothece_sp__PCC_7822_Bact | GKYVAVSARG | NFYSTWEPGQ | SEWTPHNRNS | SRRLQTMGYA | DNGGLWLIAR |
| 13 | Geitlerinema_sp__PCC_7407_Ba | GKYVTVSARG | NFYSTWEPGA | DRWVQHNRNS | SRRLQNMGFT | ADGNLWLIAR |
| 33 | Calothrix_sp__PCC_6303_Bacte | GKYVAISAKG | NFYSTWEPGT | AAWVPRNRNS | SRRLQNMGFT | SEGKLWMLAR |
| 29 | Rivularia_sp__PCC_7116_Bacte | GKYIAVSGKG | NFYSTWEPGQ | NAWVQHNRNS | SRRLQNMGFA | QNGQMMLAR  |
| 36 | Nodularia_spumigena_CCY9414_ | GKYVAVSAKG | SFYSTWEPGQ | TSWEPHNRN  | SRRLQNMGFA | ENGQLWLLAR |
| 14 | Fischerella_sp__JSC-11_Bacte | GKYVAVSAKG | NFYSTWEPGQ | NAWVPHNRNS | SRRVENMGFD | ENGLRWMLAR |

|     |                               |            |            |            |            |            |
|-----|-------------------------------|------------|------------|------------|------------|------------|
| 230 | scillatoriales_cyanobacteri   | GEYVAVSSRG | NFYSTWQPGL | SAWEPHNRNS | SRRVQNMGFT | SDGRLWMLAR |
| 250 | scillatoria_nigro-viridis_P   | GQYVAVSSKG | NFYSVWKPQG | AAWEPHNRNS | SRRLQNMGFT | KDGRLWMLAR |
| 380 | scillatoria_sp_PCC_6506_Ba    | GQYVAVSSKG | NFYSIWQPGQ | DAWTPYNRNS | SRRLQNMGFG | KDGRLWMLER |
| 20  | Crinalium_epipsammum_PCC_933  | GKYVAVSTKG | NFYSTWEPGL | DAWVGHNRS  | SRRVQNMGFT | QDGRMWMLAR |
| 30  | Synechocystis_sp_PCC_7509_B   | GKYLAVSAKG | NFYSTWEPGQ | EAWQGHNRNS | SRRVQNMGFG | KDGRLWMLAR |
| 16  | Gloeocapsa_sp_PCC_7428_Bact   | GRYLAVSAKG | NFYSIWEPGK | EAWEGHNRNS | SRRVQNMGFA | PDGRLWMLAR |
| 26  | Chroococcidiopsis_thermalis_  | GKYIAVSAKG | NFYSTWEPGQ | TAWQGHNRNS | SRRLQNMGFG | KDGRVWMLAR |
| 08  | Streptococcus_lucimarinus_CCE | GEYLGSSSRG | NFYMSWAPGQ | AYWQPHNRNS | ARRVQSMGWR | PDGGIWELTR |
| 09  | Micromonas_pusilla_CCMP1545_  | GEYLGSSSRG | NFYMTWTPGQ | AYWQPHNRSS | GRRVQSMGWR | PDGGIWELTR |
| 10  | Chlamydomonas_reinhardtii_Eu  | GDYVAVSSRG | NFYMTWSPGQ | TYWMPHNRPA | PRRLQNMGFT | PAGEVWVTR  |
| 07  | Brachypodium_distachyon_Euka  | GRYVAVSSRG | NFYLTWEPGQ | LYWQPHNRV  | ARRIQNMGWR | ADGGLWLLVR |
| 06  | Selaginella_moellendorffii_E  | GDYVAVSSRG | NFYMTWEPGQ | PYWQPHNRNS | ARRIQNMGWR | ADGGLWLVVR |
| 11  | Physcomitrella_patens_subsp_  | GDYVAVVSRG | NFFLTWEPGQ | PYWQPHNRNS | ARRIQNMGWR | ADGGLWLVVR |
| 48  | Cyanidioschyzon_merolae_Euka  | GNYIAIPSRG | NFFLTWVPGS | DFWTPHARST | SRRISAIGFD | ATKGIWETIR |
| 67  | Ectocarpus_siliculosus_Local  | GSYLAVSSRG | NFYLTWSPGQ | DFWIPHNRGT | SRRIQNMGFR | AAEGLWMTLN |
| 65  | Aureococcus_anophagefferens_  | GTYLAVSSRG | NFYLTWSPGQ | DFWLPHNRGT | PRRIQAMGFD | SSKGVWMTLN |
| 03  | Phaeodactylum_tricornutum_CC  | GAYLAVSSRG | NFFLTWEPGQ | DFWIPHNRGT | PRRIQNMGFD | IKKGLWMTLN |
| 05  | Thalassiosira_pseudonana_CCM  | GAYIAVSSRG | NFFLTWEPGQ | DFWIPHNRGT | PRRIQNMGFD | IKNGLWMTLN |
| 96  | Pyropia_zezoensis_Localdb_L   | GSYLAVSSRG | NFFLTWSPGQ | DFWVPHGRDS | SRRIQAMGFD | VNEGLWMSTR |
| 02  | Hemiselmis_andersenii_Eukary  | GKYLAISSRG | NFFLTWQPGQ | EFWIPRARDT | SRRIQSMGFD | LEQGLWMSTR |
| 04  | Guillardia_theta_Eukaryota_   | GKYLAISSRG | NFYLTWEPGQ | DFWIPRARET | SRRIQSMGFD | NQKGIWMSTR |
| 68  | Emiliana_huxleyi_Localdb_L    | GSYLAVSSRG | NFYLYRPGD  | EFWIPHNR-- | -----GFR   | LADGLWMSTA |
| 01  | QUERY_Bigel_p2saf_91760       | GQYIGVNARG | NFYLTFKPGS | DAWMPHNSRT | IRRIVTMGVD | LTNSMWMTR  |
| 47  | Lotharella_amoeboformis_Euka  | GQYIGVNARG | NFYLTFKPGD | NAWMPHNRKT | IRRIVTMGVD | LTEGMWMTR  |

201

|    |                              |            |            |            |             |            |
|----|------------------------------|------------|------------|------------|-------------|------------|
| 39 | Synechococcus_sp_JA-2-3Ba_2  | GAEIAFTDDF | TSGQWSSPLR | PGLSFGYLN  | AYQNDHDLWV  | VGGGATLIHS |
| 12 | Cyanophora_paradoxa_Eukaryot | GGQLWFSSND | SFPNWEKPKT | PEFGLGLLNL | AFKTPTEIIV  | SGGSGILLSS |
| 21 | Synechococcus_elongatus_PCC_ | GGRLQFSDN  | WEDAWGTAIE | PEAGWGFLDL | AYRSKQEIWL  | SGGSGTLLVS |
| 15 | Thermosynechococcus_elongatu | GGKIAFSDPD | NSENWGELLS | PLNSVGFLDL | AYRTPNEVWL  | AGGAGALLCS |
| 35 | Acaryochloris_sp_CCMEE_5410  | GGQVQFSENG | DY-AWDEAFT | PGNKIGLLDL | AYRTPDEVWI  | SGGSGTLLCS |
| 24 | Leptolyngbya_sp_PCC_7375_Ba  | GGQMQFSQTD | EDESWGEPLR | PETSWGFLDV | GYRTDNELWV  | SGGSGTLLMS |
| 34 | Leptolyngbya_sp_PCC_6406_Ba  | GGQLQFSPTG | SEDGWQDPLN | PESSWGLLDM | GYRTPDEIIV  | SGGSGNLLNS |
| 32 | Dactylococcopsis_salina_PCC_ | GGQVQFTESE | DFDSWQEPEY | PESSKGLLDI | GYRTEDEFWV  | SGGSGDLFRY |
| 18 | Chamaesiphon_minutus_PCC_660 | GGQLQFSSPG | ATDKWEEVEF | PATNIGLLDL | AYRTPGEVWV  | SGGSGDLLVS |
| 31 | Gloeocapsa_sp_PCC_73106_Bac  | GGQLQFSEPE | AWEWGEVKY  | PETSWGLLDM | GYRTDELWA   | AGGSGNLLRS |
| 22 | Cyanobacterium_aponinum_PCC_ | GGQIQFSKPN | NFEWEEAIT  | PETSWGFLDL | TVQNQEIQWL  | AGGSGNLLLS |
| 28 | Microcystis_aeruginosa_DIANC | GGQLQFTSPN | DLDTWEDKVF | PETSWGLLDL | NYRTPPEIIV  | AGGSGNLLVS |
| 19 | Stanieria_cyanosphaera_PCC_7 | GGQIQFSEPE | DFEAWQEPIY | PETSWGLLDI | AYRNPEEIVW  | AGGSGNLLAS |
| 17 | Pleurocapsa_sp_PCC_7327_Bac  | GGQIQFASTD | GQEEWGEVIY | PETSWGLLDL | AYRTPPEIIVW | SGGSGNVLVS |

27Cyanothecce\_sp\_\_PCC\_7822\_Bact GGQLQFTSPE DLETWDEALY PETSWGLLDL SYRTPEEMWI AGGSGNLLVS  
 13Geitlerinema\_sp\_\_PCC\_7407\_Ba GGELQFTQ-G DYEAWDEPN PETSWGLLDL AYRTPDELWV TGGSANLLRS  
 33Calothrix\_sp\_\_PCC\_6303\_Bacte GGQIQFTDPE DDEKWLDPPK PEYSWALLDM AYRNSDDVWA TGGSGSLLHS  
 29Rivularia\_sp\_\_PCC\_7116\_Bacte GGQVQFSEPN SLEEWLDAQY PETSWGLLDL AYRTPSEIWL SGGSANLLHS  
 36Nodularia\_spumigena\_CCY9414\_ GGQVQFSEPN NPEEWQEAQN PETSWGLLDL AYRTPDELWI GGGSGNLLSS  
 14Fischerella\_sp\_\_JSC-11\_Bacte GGQIQFSETA DGEKWLEPQN PETSWGLLDM AYRTPDEIYW SGGSGNLLRS  
 230scillatoriales\_cyanobacteri GGQIQFTSPE NSEEWTDPIN PETSWGLLDL AYRTPDEVVW AGGSGNLLLS  
 250scillatoria\_nigro-viridis\_P GGQIQFSDPE SPEGWGKPPF PDASWGLLDM AYRTDNEVWV AGGGGNLLCS  
 380scillatoria\_sp\_\_PCC\_6506\_Ba GGQIQFSDPQ NRDEWGEPPS PDASWGLLDL VYRTNDEIWL AGGGGNLLCS  
 20Crinalium\_epipsammum\_PCC\_933 GGQVQFSKSD DIESWDEVQY PETSWGLLDL AYRTPDEIWL AGGSGNLLCS  
 30Synechocystis\_sp\_\_PCC\_7509\_B GGQIQFSQPN TLDEWDEAQY PETSWGLIDL AYRTPPEIWL AGGSGNLLCS  
 16Gloeocapsa\_sp\_\_PCC\_7428\_Bact GGQVQFTKPD NPDEWEEAQY PETSWGLLDL AYRTPPEIWI AGGSGNLLCS  
 26Chroococciopsis\_thermalis\_ GGQVQFTKAD NTEEWEEVQN PETSWGLLDL AYRTPPEIYW TGGSGNLLCS  
 080streococcus\_lucimarinus\_CCE GGGIFFSAET GLSEFNENRI GSRGFGLLDL GYTSKTFWT VGGSGSVFYS  
 09Micromonas\_pusilla\_CCMP1545\_ GGGIYFSNTA SLDDFSEGRI GSRGFGLLDL SYTDGKQFWI VGGSGSVFVS  
 10Chlamydomonas\_reinhardtii\_Eu GGDLVSEDA GLEKFKDVTI NSRFGILDV GFRDKVA-FA CGGSGSLYRS  
 07Brachypodium\_distachyon\_Euka GGGLFLSKGT G-EEFEEASV QSRFGILDV GYRKDEA-WA AGGSGVLLKT  
 06Selaginella\_moellendorffii\_E GGGLYLKCL G-EDFEEASI PSRFGILDV GYRKDEA-WA AGGSGMLLKT  
 11Physcomitrella\_patens\_subsp\_ GGGLYVSKGT GVEDFEEQKI PSRFGILDV GYRKDEA-WA AGGSGILLRT  
 48Cyanidioschyzon\_merolae\_Euka GGGLGFTKPN VNIAFDMVDS KTGGYGILDV AFQDDRHWVA AVGGGSMYRS  
 67Ectocarpus\_siliculosus\_Local GGAMQMSTTL P-PLFSETAI KSGGYGILDV AWKNDNEAWA VGGGGSWLYS  
 65Aureococcus\_anophagefferens\_ GGQMALGGKS AVPTFNVINL NSGGYGILDA AWRDSKEAWA VGGGNTMYVS  
 03Phaeodactylum\_tricornutum\_CC GGKLFISSEE P-FDFQEADI KTGGYGITDV AWRNPKEVWA VGGSNMYSVS  
 05Thalassiosira\_pseudonana\_CCM GGKLLVSSSD SVFPFDEANI KTGGYGITDV AWRDDNEVWA VGGSNMYSVS  
 96Pyropia\_zezoensis\_Localdb\_L GGGLQTTSQS PDLTFNKADL KSGGYGILDI AYRGTNEVWA ALGGGALYVS  
 02Hemiselmis\_andersenii\_Eukary GGGLSFTKSQ PDFDFSSSDI KTGGYGILDV NFKNKDELWA ACGGGILYSS  
 04Guillardia\_theta\_Eukaryota\_ GGGLSVSTKN FDFNFENIDI KTGGYGILDA AFVNDKDIWI ICGGGIVYNS  
 68Emiliana\_huxleyi\_Localdb\_L GGEISKTTSG QPIPFDRCCI KSGGYGILDV LFLDSNKAWA VGGGGTIFGS  
 01QUERY\_Bigel\_p2saf\_91760 AGGVSFVKGD AN--FYETSI NSGGYGILDV TRRNGD-LWC VGGGGKIFLS  
 47Lotharella\_amoebiformis\_Euka AGGVSFAKGG SD--FVDTTI NSGGYGILDV TKLNGD-MWC VGGGGKSS-S

251

39Synechococcus\_sp\_\_JA-2-3Ba\_2 PDGGKTWEQA KKLSNIPANF YSIEFFGPEQ GFILQQRGTL LRYSS  
 12Cyanophora\_paradoxa\_Eukaryot QDTGNTWKKE TSTDNIPSNF YKISFIDKEV GFVLGNQGT LRY--  
 21Synechococcus\_elongatus\_PCC\_ EDGGEHWQRD RVIAKLPSNL YTIKFFAPKQ GFVLQQRGLL LRYEA  
 15Thermosynechococcus\_elongatu QDGGQTTWQQD VDVKKVPSNF YKILFFSPDQ GFILQKQKIL LRYTA  
 35Acaryochloris\_sp\_\_CCMEE\_5410 LDGGQTTWQKD STVEDVPSNL YKIIFVSSDQ GFIIGQSGTL LRFPK  
 24Leptolyngbya\_sp\_\_PCC\_7375\_Ba PDGGETWLKD EPAGDVPSNL YRVKFFNQDQ GFILQQRGYL LRYEA  
 34Leptolyngbya\_sp\_\_PCC\_6406\_Ba QDGGKTWYKD KELSAPVPSNF YRILFMSPEQ GFILQQRGYL LRYKA  
 32Dactylococcopsis\_salina\_PCC\_ AQTKGVWEKD REMQNVPGNF YRVKFFSPEK GFILGDRGTV LKYTN

|                                 |            |            |            |            |        |
|---------------------------------|------------|------------|------------|------------|--------|
| 18Chamaesiphon_minutus_PCC_660  | TDSGKTWLKD | SNVEQVPSNL | YKILFFSPDR | GFIIGQRGII | LKYQG  |
| 31Gloeocapsa_sp__PCC_73106_Bac  | LDDGETWEKD | RDVENIASNF | YRVVFISPEQ | GFVLGQNGIL | LKYEK  |
| 22Cyanobacterium_aponinum_PCC_  | KDNGQSWFKD | REIESVPSNL | YKIVFVGDNK | GFILGERGVL | LKYQS  |
| 28Microcystis_aeruginosa_DIANC  | DDGGQSWQKD | RAVESVPSNL | YRIVFINSDK | GFVLGQNGVL | LKYPS  |
| 19Stanieria_cyanosphaera_PCC_7  | FDAGKTWQKD | REVEEVPSNF | YKVVFLSPEQ | GFVLGERGVL | LKYTT  |
| 17Pleurocapsa_sp__PCC_7327_Bac  | FDNGKTWQKD | REIEDTPSNL | YKIVFVTPEK | GFILGQKGVL | LRYP A |
| 27Cyanothec e_sp__PCC_7822_Bact | FDNGKTWEKD | REVENVPSNL | YKIVFVNSEK | GFVLGQKGVL | LKYPT  |
| 13Geitlerinema_sp__PCC_7407_Ba  | VDGGKTWEKD | RSVEDIPSNF | YRVVFFDGDK | GFVLGQRGTL | LKYNS  |
| 33Calothrix_sp__PCC_6303_Bacte  | PDGGKTWEKD | TEMEEVPANF | FKVVFVSPEQ | GFAIGDRGYL | LKYVA  |
| 29Rivularia_sp__PCC_7116_Bacte  | SDGGQTWEKD | RDVEDVATNF | YKVVFLSPEK | GFVIGDRGFL | LKYES  |
| 36Nodularia_spumigena_CCY9414_  | ADGGQTWEKD | RDVEGVAANL | YKVVFFNSDQ | GFVIGDRGVL | LKYSP  |
| 14Fischerella_sp__JSC-11_Bacte  | SDGGKTWEKD | RDVEGIPANF | YKIVFFSPEQ | GFVIGDRGYL | LKYKS  |
| 230scillatoriales_cyanobacteri  | RDGGKTWEKD | RFVEDVPSNF | YRIKFFGTEK | GFIIGQQGTL | LKYNS  |
| 250scillatoria_nigro-viridis_P  | FDGGKTWQKD | REVEDVPANF | YRIVFMGPDR | GFVLGASGTL | LKYSA  |
| 380scillatoria_sp__PCC_6506_Ba  | FDGGKTWQKD | REVEDVPANF | YKIVFMTPEK | GFIIGATGTL | LKYSA  |
| 20Crinalium_epipsammum_PCC_933  | LDGGKTWQKD | REVEDVASNF | YKIVFVTPEQ | GFIIGQRGIL | LKYEA  |
| 30Synechocystis_sp__PCC_7509_B  | FDGGKTWLKD | REIENVPSNL | YKIVFVKPDQ | GFIIGQRGVL | LKYAV  |
| 16Gloeocapsa_sp__PCC_7428_Bact  | FDGGKTWQKD | REVEEVPSNL | YKIVFLTPEK | GFVVGQRGIL | LKYPS  |
| 26Chroococci diopsis_thermalis_ | PDGGKTWQKD | RGVESVPSNL | YKIVFLSPEK | GFIIGQRGIL | LRYQA  |
| 080streococcus_lucimarinus_CCE  | TDAGKSWKRD | RGTDNVAANL | YNVKFQSEDQ | GFILGNDGIL | LRFTG  |
| 09Micromonas_pusilla_CCMP1545_  | NDAGKSWKRD | RGTDNVAANL | YRVRFQSNKQ | GFVLGNDGIL | LRFTG  |
| 10Chlamydomonas_reinhardtii_Eu  | EDGGKNWKRD | RSTDDVAGNL | YAIKFFNPQL | GFVLGNDGIL | LRYTG  |
| 07Brachypodium_distachyon_Euka  | MNGGKSWVRD | KAADNIPGNL | YSVKFVGDNQ | GFVLGNDGVL | LRYVG  |
| 06Selaginella_moellendorffii_E  | TDGGNTWSRD | RVADSIAANL | YSVKFLDNKK | GFVLGNDGVL | LRYLS  |
| 11Physcomitrella_patens_subsp_  | TDGGKSWIRD | KVADKIAANL | YSVKFIDN-K | GFVLGNDGVL | LRYLG  |
| 48Cyanidioschyzon_merolae_Euka  | DDGGKTWRRD | PLVSKVGANL | YKIKFFGSQR | GFVLGADGVL | LKFHP  |
| 67Ectocarpus_siliculosus_Local  | TDGGETFKFS | SGATNIGANL | YDVKFFGGDK | GFAIGSDGVL | LKYIP  |
| 65Aureococcus_anophagefferens_  | KDGGKNFKFD | DSADKIPGNL | YAIKFFGPNT | GFALGSDGVL | MKFNA  |
| 03Phaeodactylum_tricornutum_CC  | FDGGKKFQFD | KSGNAYPGNL | YNVKFFPQNA | GWALGSNGLL | LRYTG  |
| 05Thalassiosira_pseudonana_CCM  | KDNGRNFVFD | KSANDIPGNL | YNVKFFRENA | GWALGSNGLL | LKYVG  |
| 96Pyropia_yezoensis_Localdb__L  | KDGGKSFKPD | KTVGKIGTNL | YKIKFFSKDV | AFALGASGVL | LRYNP  |
| 02Hemiselmis_andersenii_Eukary  | IDGGKSWKK- | DDEDKVIKSL | YKIKFFNSKL | GFVLGSNGVL | LRYPE  |
| 04Guillardia_theta_Eukaryota__  | TDKGKNWTKV | DGIDKLSGNL | YKIKFVNNNK | GFILGSNGLL | LRYQ-  |
| 68Emiliana_huxleyi_Localdb__L   | TDGGRSWQKD | KSADDLPTNL | YKIKSFSNGR | VYILGSNGAL | SPRRA  |
| 01QUERY_Bigel_p2saf_91760       | RNNGKTWTAD | SSGDNQPANF | YKIKFYDDKR | GFILGSAGVL | MKFND  |
| 47Lotharella_amoeboformis_Euka  | RATGEELDC- | -----      | -----      | -----      | -----  |

## Alignment: PRK

|              |             |            |            |            |            |            |
|--------------|-------------|------------|------------|------------|------------|------------|
| 01Lth_prk    | -----       | -----      | -----      | -----      | -----      | -----      |
| 40Gymnochl   | -----       | -----      | VNAIFGTTTI | TTICLDDYHT | LDRTGRKDTG | ISALDVKANN |
| 38Chlorarac  | -----       | -----      | VNAIFGTTMI | TTICLDDFHT | LDRTGRKDTG | ISTLDVKANN |
| 39Bigelowi   | PVIFGVAADS  | GCGKSTFLRR | VNAIFGTTTI | TTICLDDFHT | LDRTGRADTG | ISALDVRANN |
| 10Prymnesi   | PVVVGVAADS  | GCGKSTFMRR | LTSIFGIGRT | TVICLDDYHK | WDRTGRKSNG | ITALHEACQD |
| 11Emiliani   | PVVIIGLAADS | GCGKSTFMRR | VTGIFGIGRT | TVICLDDYHK | WDRTGRKSNG | ITALHEACQN |
| 02Eut        | -----       | -----R     | LTGIFGGGFT | TVMCLDDYHL | NDRAGRKVTG | LTALDERENN |
| 03Euglena    | TVLIGVAADS  | GCGKSTFMRR | LTGIFGGGFT | TVMCLDDYHL | NDRAGRKVTG | LTALDQRENN |
| 04Guillardia | PVVIIGLAADS | GCGKSTFMRR | VTACFGIGRT | TVICLDDYHL | NDRQGRKKTG | LTALDPRENN |
| 41Cschyzon   | PVMVGVAADS  | GAGKSTFLRR | VMRMFGSDII | TVICLDDWHN | RDRQGRKEDN | ITALDENCQN |
| 12Pavlova    | AFVVGVAADS  | GCGKSTFMRR | LTNIFGIGRT | TVICLDDYHL | YDRKGRSANK | ITALHKDCQK |
| 44Chondrus   | PVIIGVAADS  | GCGKSTFLRR | VTGIFGTEVI | SVICLDDYHL | HDRMGRREAR | VTALDEAANN |
| 42Porphyrid  | -----       | -----      | -----      | -----LPL   | PRPQGPQGRQ | RTALDEKANN |
| 07Thalassi   | PIVIGLAADS  | GCGKSTFMRR | VTSTFGGGFA | TVICLDDYHL | NDRGRKVSF  | LTALNTAEQK |
| 05odontella  | PIVIGVAADS  | GCGKSTFMRR | LTSIFGGGFT | TVLCLDDYHL | NDRNGRKTQ  | RTALDPLENN |
| 06Phaeodact  | PIIIGVAADS  | GCGKSTFMRR | LTNIFGGGFT | TVICLDDYHL | NDRAGRKVTM | RTALDPEENN |
| 08Vaucheria  | VVIIGVAADS  | GCGKSTFMRR | LTNIFGGGFT | TVICLDDYHL | NDRNGRKVSF | RTALHTDEQK |
| 09Ectocarpus | VVLIGVAADS  | GCGKSTFMRR | LTSIFGGGFT | TVLCLDDYHL | NDRGGRKVSF | RTALHTEEQK |
| 43Galdieria  | PVIIGVAADS  | GCGKSTFLRR | VNEIFGTVV  | TVICLDDFHT | LDRKGRAEKK | VTALNPEANN |
| 13Microm_p   | PVIIGLAADS  | GCGKSTFMRR | MTSLFGGGNT | TVLCLDDYHL | NDRNGRKESE | LTALNLKEQN |
| 14Microm_stn | PVLIIGLAADS | GCGKSTFMRR | MTSLFGGGNT | TVLCLDDYHL | NDRNGRKESE | LTALNLKEQN |
| 15ostreoc_l  | PVIIGLAADS  | GCGKSTFMRR | MTSLFGGGNT | TVLCLDDYHL | NDRAGRKTSG | LTALNLKEQN |
| 16ostreoc_t  | PVIIGLAADS  | GCGKSTFMRR | MTSLFGGGNT | TVLCLDDYHL | NDRQGRKDSG | LTALNLKEQN |
| 17Chlorella  | SVMIGLAADS  | GCGKSTFMRR | MIGVFGGNA  | TVICLDDYHC | LDRTGRKEKG | VTALDPAQD  |
| 18Chlorel_sp | IVVIGLAADS  | GCGKSTFMRR | VTGIFGGGNT | TVICLDDYHS | LDRNGRKEAG | VTALAPESQN |
| 19Chlamydom  | TVVIGLAADS  | GCGKSTFMRR | MTSIFGGGNT | TVICLDDYHC | LDRNGRKVKG | VTALAPEAQN |
| 20Volvox     | TVVIGLAADS  | GCGKSTFMRR | MTSIFGGGNT | TVICLDDYHC | LDRNGRKVKG | VTALAPEAQN |
| 27Oryza_s2   | TVVIGLAADS  | GCGKTFVRR  | LTSVLGGGNA | TVICLDDYHS | LDRAGRKERG | VTALDPRAND |
| 34Closterium | TVVVGLAADS  | GCGKSTFMRR | MTGVFGGNT  | TVICLDDYHS | LDRNGRKEAN | VTALDPKANN |
| 26Arabidopsi | TIVIGLAADS  | GCGKSTFMRR | LTSVFGGNT  | TVICLDDYHS | LDYGRKEQK  | VTALDPRAND |
| 24Zea_mays   | PVVIIGLAADS | GCGKSTFMRR | LTSVFGGNT  | TVICLDDYHS | LDRTGRKEKG | VTALDPRANN |
| 23Oryza_sl   | PVVIIGLAADS | GCGKSTFMRR | LTSVFGGNT  | TVICLDDYHS | LDRTGRKEKG | VTALDPRAND |
| 25Triticum   | PIVIGLAADS  | GCGKSTFMRR | LTSVFGGNT  | TVICLDDYHS | LDRTGRKEKG | VTALDPKAND |
| 31Selaginell | TIVIGLAADS  | GCGKSTFMRR | LTSVFGGNT  | TVICLDDYHS | LDRTGRKEKG | VTALDPKANN |
| 29Spinacia   | TIVIGLAADS  | GCGKSTFMRR | LTSVFGGNT  | TVICLDDFHS | LDRNGRKEVE | VTALDPKAND |
| 30Beta_vu    | -----       | --GKSTFMRR | LTSVFGGNT  | TVICLDDFHS | LDRTGRKEKG | VTALDPRAND |
| 22Populus    | TVVIGLAADS  | GCGKSTFMRR | LTSVFGGNT  | TVICLDDYHS | LDRTGRKEKG | VTALDPRANN |
| 28Pisum_sa   | TIVIGLAADS  | GCGKSTFMRR | LTSVFGGNT  | TVICLDDYHS | LDRTGRKEKG | VTALDPKAND |

|                 |             |            |            |            |            |            |
|-----------------|-------------|------------|------------|------------|------------|------------|
| 21Arteminis     | TIVIGLAADS  | GCGKSTFMRR | LTSVFGGGNT | TVICLDDYHS | LDRTGRKEEG | VTALDPRANN |
| 32Physcomi      | TVVIGLAADS  | GCGKSTFMRR | LTSVFGGGNT | TVICLDDYHS | LDRYGRKEKA | VTALDPRANN |
| 33Chara_braunii | TVVIGLAADS  | GCGKSTFMRR | LTSVFGGGNT | TVICLDDYHS | LDRTGRKVHG | VTALDPRANN |
| 36Gloeochaete   | -----       | -----      | CMTFFGQEFL | TVICLDDYHT | LDRKGRTEAG | VTALDPRANN |
| 37Cyanophora    | PVIIGVAGDS  | GCGKSTFLRR | LYDIFGTEVL | TVICLDDYHT | LDRTGRKEAG | VTALDPKANN |
| 35Glaucocyst    | -----       | -----      | ----FGSDVL | TVICLDDYHT | LDRQGRKEAG | VTALDPRANN |
| 47Synechoco     | VVLIGVAGDS  | GCGKSTFLNR | LADLFGTELM | TVICLDDYHS | LDRKGRKEAG | VTALDPRANN |
| 54Nostoc_pun    | VVLIGVAGDS  | GCGKSTFLRR | LIDLFGEDLM | TVICLDDYHS | LDRKQRKETG | ITALDPRANN |
| 55Nodularia     | VVLIGVAGDS  | GCGKSTFLRR | LIDLFGEEFM | TVICLDDYHS | LDRKQRKETG | ITALDPRANN |
| 52Nostoc_sp     | VVLIGVAGDS  | GCGKSTFLRR | LIDLFGEEFM | TVICLDDYHS | LDRKQRKETG | ITALDPRANN |
| 53Anabaena_v    | VVLIGVAGDS  | GCGKSTFLRR | LIDLFGEEFM | TVICLDDYHS | LDRKQRKETG | ITALDPRANN |
| 56Synech2       | VVLIGVAGDS  | GCGKSTFLRR | LADLFGEEFM | TVICLDDYHS | LDRKQRKEKK | VTALNPKANN |
| 46Microcys      | VVLIGVAGDS  | GCGKSTFLRR | LTDLFGAEFM | TVICLDDYHC | LDRKQRKEVG | VTALNPKANN |
| 48Microco_ch    | VVLIAGVAGDS | GCGKSTFLHR | LADLFGEEFM | TVICLDDYHS | LDRKGRKAAG | VTALNPKANN |
| 45Cyanothe      | VVLIAGVAGDS | GCGKSTFLRR | LTDLFGEEFM | TVICLDDYHS | LDRKGRKAAG | VTALNPKANN |
| 49Synechl       | VVLIGVAGDS  | GCGKSTFLRR | LTDLFGEEFM | TVICLDDYHS | LDRQGRKAAG | VTALDPRANN |
| 57Trichodes     | VVLIGVAGDS  | GCGKSTFLRR | ITDVFGEFV  | TVICLDDYHS | LDRKQRKETG | ITALDPRANN |
| 58Lyngbya       | VVLIGVAGDS  | GCGKSTFLRR | ITDIFGEDFV | TVICLDDYHS | LDRKQRKETG | ITALDPRANN |
| 50Thermosyn     | VVLIGVAGDS  | GCGKSTFLRR | LADLFGEDFM | TVICLDDYHS | LDRKQRKEMG | ITALDPRANN |
| 51Acaryochl     | VVLIGVAGDS  | GCGKSTFLRR | LEDLFGEQFI | TVICLDDYHS | LDRYQRKETG | ITALDPRANN |

61

|              |            |            |            |            |            |            |
|--------------|------------|------------|------------|------------|------------|------------|
| 01Lth_prk    | -----      | -----      | -----      | -----      | -----      | -----      |
| 40Gymnochl   | FKLMADQLKA | LKQGRAIKKP | IYNHDTGAI  | PVETIHPNHI | VIVEGLHPML | DKDVIDSLDF |
| 38Chlorarac  | FKLMADQLKA | LKQGRAIKKP | IYNHDTGAI  | PVEVIHPNHI | IIVEGLHPML | DKDVVESLDF |
| 39Bigelowi   | FALMADQLKA | LKQGRAIKKP | IYNHDTGAI  | PVETIHPNHI | IIVEGLHPML | DKDVIESLDF |
| 10Prymnesi   | WDKMAADVLD | LKAGKSVSKP | IYNHVTGELD | PYEDVDPTPI | VIFEGLHPMY | DERVNKALDL |
| 11Emiliani   | WDKMAADVTD | LKAGKAVEKP | IYNHITGELD | PDEPVQPTPI | VIFEGLHPMH | DERVNEALDL |
| 02Eut        | FDLMYEQLNA | LR-----TKP | IYNHVNGTLD | TPEKIDSSPL | MIIEGLHPLL | DDRVAGLVDF |
| 03Euglena    | FDLMFEQMSS | LKRGETIAKP | IYNHVNGTLD | TPEEIPASI  | MIIEGLHPLL | DDRVAGLLDF |
| 04Guillardia | FDLMYEQVKA | LKEGKVMKP  | IYNHVNGTLD | EAEETPTPI  | IIFEGLHPFY | DKRVEELMDF |
| 41Cschyzon   | FDLMAEQLEA | LKNGFDIMKP | IYNHETGRID | PPELVSPNHI | VVEGLHPMY  | DERVRKLLDF |
| 12Pavlova    | WDLMAEQVAA | IKAGNSVMKP | IYNHITGELD | APEEIVPTDI | VIFEGLHPML | DDKVRSMDDL |
| 44Chondrus   | FELMASQIQA | LREGKSIMKP | IYNHETGEID | ECELVEPNHI | IVIEGLHPMY | DTRVKKSLDF |
| 42Porphyrid  | FTLMAAQVKA | LKEGKAIYKP | IYNHDTGEHD | PSELIEPNHL | VVIEGLHPMY | DPRVAELLDL |
| 07Thalassi   | FDLMFEHVKA | LKEGKTIMKP | IYNHVNGTLD | TPEEIEPTPV | IIIEGLHPFV | DERVRELIDF |
| 05odontella  | FDLMYEQIAA | LKNGESIEKP | IYNHVNGTLD | TPETIVPTPI | VIIEGLHPMY | DERVRDLLDF |
| 06Phaeodact  | FDLMYEQVKA | LKDGTVEKP  | IYNHVNGTLD | TPETIEPTPI | IIFEGLHPMH | DKRVLDDLDF |
| 08Vaucheria  | FDLMTEQLSA | LKRGESVMKP | IYNHVNGTLD | TPEEVKPTPI | VIIEGLHPFV | DERVRDLLDF |
| 09Ectocarpus | FDLMYEQLND | LKNGKSVSKP | IYNHVNGTLD | TPEEIKPTPI | VIIEGLHPFV | DKRVRDLLDF |



|                 |            |            |            |            |            |            |
|-----------------|------------|------------|------------|------------|------------|------------|
| 43Galdieria     | FELMYQQIAA | LKEGYDIMKP | IYNHQTGLID | PPELIQPNHI | IVIEGLHPWY | DARMKQLLDF |
| 13Microm_p      | FDLMYDQVKA | LKEGKAVEKP | IYNHVTGVFD | PAEKIESPDI | LILEGLHPFA | DERVRDMFDF |
| 14Microm_stn    | FDLMYEQTKA | LMEGKAVDKP | IYNHVTGVFD | PAEKIESPSI | LILEGLHPFA | DERVRDMFDF |
| 15Ostreoc_l     | FDLMYDQVKA | LKEGKSVDKP | IYNHVTGVFD | PAEKIESPEV | LILEGLHPFA | DTRVRDMFDF |
| 16Ostreoc_t     | FDLMYEQVKA | LKEGKSVDKP | IYNHVTGVFD | PAEKIESPEV | LILEGLHPFA | DTRVRDMFDF |
| 17Chlorella     | FELMYEQAKA | IKEGKSIDKP | IYNHVSGLLD | PAETIKPPKI | MVLEGLHPFY | DERVRDLYDF |
| 18Chlorel_sp    | FDLMYEQVKA | LKEGKAVDKP | IYNHVTGLLD | PPEPTSSPNI | LVIEGLHPFY | DERVNELVDF |
| 19Chlamydom     | FDLMYNQVKA | LKEGKSVDKP | IYNHVSGLID | APEKIESPPI | LVIEGLHPFY | DKRVAELLDF |
| 20Volvox        | FDLMYNQVKA | LKEGKAVDKP | IYNHVTGLID | APEKIDSPNI | LVIEGLHPFF | DKRVADLLDF |
| 27Oryza_s2      | FDLMYRQLKA | IKEGRAVAKP | IYNHATGLLD | PPELITPPKI | LVVEGLHPMY | DERVRGLLDF |
| 34Closterium    | FDLMYEQVKA | LKEGKSVMKP | IYNHVSGLLD | PPELIESPKI | LVIEGLHPMY | DERVRDLIDF |
| 26Arabidopsi    | FDLMYEQVKA | LKNGIAVEKP | IYNHVTGLLD | PPELIQPPKI | LVIEGLHPMF | DERVRDLLDF |
| 24Zea_mays      | FDLMYEQVKA | IKQGQAVQKP | IYNHVTGLLD | PPELITPPKI | FVIEGLHPMF | DERVRDLLDF |
| 23Oryza_s1      | FDLMYEQVKA | IKEGKAIEKP | IYNHVTGLLD | PPELIQPPKI | FVIEGLHPMF | DERVRDLLDF |
| 25Triticum      | FDLMYEQVKA | IKEGKAIEKP | IYNHVTGLLD | PAELIQPPKI | FVIEGLHPMY | DERVRELLDF |
| 31Selaginell    | FDLMYEQVKA | LKEGKAVQKP | IYNHVSGLLD | PPELIQPPKI | LVIEGLHPMF | DSRVRELLDF |
| 29Spinacia      | FDLMYEQVKA | LKEGKAVDKP | IYNHVSGLLD | PPELIQPPKI | LVIEGLHPMY | DARVRELLDF |
| 30Beta_vu       | FDLMYDQVKA | LKQGKPVDKP | IYNHVSGLLD | PPEVIQPPKI | LVIEGLHPMY | DARVRELLDF |
| 22Populus       | FDLMYEQVKA | IKDGTAVEKP | IYNHVTGLLD | PPELIKPPKI | LVIEGLHPMY | DQVRDLLDF  |
| 28Pisum_sa      | FDLMYEQVKA | IKDGKSVQKP | IYNHVTGLLD | APELIKPPKI | LVIEGLHPMY | DSRVRELLDF |
| 21Arteminis     | FDLMYEQVKA | LKDGTAVQKP | IYNHVSGLLD | PPELIKPPKI | LVIEGLHPMY | DERVRDLLDF |
| 32Physcomi      | FDLMYEQVKA | LKEGKSVEKP | IYNHVTGLLD | APETIHPPKI | LVIEGLHPMY | DERVRELLDF |
| 33Chara_braunii | FDLMYEQVKA | LKEGKTVEKP | IYNHVSGLLD | PAETIAAPKI | LVIEGLHPMY | DERVRELLDF |
| 36Gloeochaete   | FDLMYEQIKA | LKNLEAIEKP | IYNHETGKLD | PPETVYPNHI | IVVAAFTEMF | DPRVRELLDF |
| 37Cyanophora    | FDLMYEQIKA | LKNGEAIQKP | IYNHETGKID | PAETVDPNHI | IVVEGLHPMY | DKRVRDLLDF |
| 35Glaucocyst    | FDLMYEQIKA | LKNLEAIEKP | IYNHETGKLD | PPETVYPNHI | IVVAAFTDMF | DPRVRELLDF |
| 47Synechoco     | FDLMYEQVKA | LKNGETIMKP | IYNHETGLID | PPEKIEPNRI | IVIEGLHPLY | DERVRELLDF |
| 54Nostoc_pun    | FDLMYEQIKT | LKSGQAIDKP | IYNHETGLID | PPERVEPNHI | IVVEGLHPLY | DERVRSLLDF |
| 55Nodularia     | FDLMYEQIKA | LKEGQVIQKP | IYNHETGMID | PPERVEPNHI | IVVEGLHPLY | DERVRSLLDF |
| 52Nostoc_sp     | FDLMYEQIKA | LKEGQTINKP | IYNHETGLID | PPEIVKPNHI | VVVEGLHPLY | DERVRSLLDF |
| 53Anabaena_v    | FDLMYEQIKA | LKEGQTINKP | IYNHETGLID | PPEIVKPNHI | VVVEGLHPLY | DERVRSLLDF |
| 56Synech2       | FDLMYEQIKA | LKEGNTIDKP | IYNHETGELD | PPEKVEPNKI | IVIEGLHPLY | DERVRNLLDF |
| 46Microcys      | FDLMYEQIKA | LKEGQAINKP | IYNHETGMID | PPEIIEPNKV | IVIEGLHPLY | DERVRALLDF |
| 48Microco_ch    | FDLMYEQIKA | LKNGQAIDKP | IYNHETGELD | PPERVEPNKV | VVIEGLHPLY | DERVRSLLDF |
| 45Cyanothe      | FDLMYEQIKA | LKSGQAIDKP | IYNHETGELD | PPERIEPNKV | VVIEGLHPLF | DERVRELVDF |
| 49Synechl       | FDLMYEQIKT | LKSGQSIMKP | IYNHETGLLD | PPEKVEPNKV | VVIEGLHPLY | DERVRELVDF |
| 57Trichodes     | FDLMYEQIKA | LKNLESIDKP | IYNHETGMID | PPEKIHPNHI | IVIEGLHPLY | DERVRELIDF |
| 58Lyngbya       | FDLMAEQIKA | LKNGQSIMKP | IYNHETGLID | PPERIDPNHI | IVIEGLHPLY | DERVRELLDF |
| 50Thermosyn     | FDLMYEQIKA | LKNGESIMKP | IYNHETGTID | PPEKVDPNHV | IVIEGLHPLY | DERVRSLLDF |
| 51Acaryochl     | FDLMYEQIKT | LKGGQSIDKP | IYNHETGLID | PPERIDPNHV | IVIEGLHPLH | DERVRGLIDF |

|              |            |            |             |            |             |              |             |
|--------------|------------|------------|-------------|------------|-------------|--------------|-------------|
| 01Lth_prk    | -----      | -----      | -----       | -----      | -----       | -DKFVAPQKA   | NADV IISVEP |
| 40Gymnochl   | TFYIDVSDEV | KKAWKIQRDV | AERGHKVEDI  | IASIESRKED | FEK FVAPQKA | NADV IISVEP  |             |
| 38Chlorarac  | TFYIDVSDPV | KKAWKIERDM | VERGHKKEDI  | IASIESRKP  | FEK FVEPQKE | TADV IISIEP  |             |
| 39Bigelowi   | TFYIDVSDPV | KKAWKIERDM | VERGHKKEDI  | IASIESRKP  | FEK FVEPQKA | NADV IISIEP  |             |
| 10Prymnesi   | TVYLDITDEV | KFAWKAQRDI | AERGATMEEV  | QKAIDGRKPD | FAAYVEPQKA  | KADI IVQVLP  |             |
| 11Emiliani   | TIYLDITDDV | KFAWKAQRDI | AERGATPEEV  | QAAIDGRKPD | FAAYVEPQKA  | KADI IIQVLP  |             |
| 02Eut        | SIYLDISERV | KFAWKIQRDM | AERGWKLEDV  | KAEIEKRKPD | FHKYVAPQKS  | KGDIVIEVLP   |             |
| 03Euglena    | SIYLDISDRV | KFAWKIQRDM | AERGWALEDI  | KKDIEKRKPD | FDKYVAPQRA  | KADMVIEVLP   |             |
| 04Guillardia | KIYVDITPEV | KFNWKVQRDH | EERGHSESIE  | KQQIEARKPD | FDAYIDPQKN  | KADCVIQVLP   |             |
| 41Cschyzon   | SVYLDLDDEV | KIAWKIQRDM | AERGHSTLEAI | LASIEARKPD | FERFILPQRQ  | YADAVIQVKP   |             |
| 12Pavlova    | SIYLDISGXV | KFAWKIQRDM | QERGHSLSEI  | KASIEGRKPD | FDAFVAPQRA  | NADIVIEVLP   |             |
| 44Chondrus   | SVYLDLADEV | KIAWKIQRDM | AERGHSLSEI  | LASIESRKP  | FAQFVDPQKR  | DCDVVMEILP   |             |
| 42Porphyrid  | SVYMDVSDEV | KLSWKVQRDM | AERGHSTLENI | LASIESRKP  | FAQFVDPQKK  | KADIVLNILP   |             |
| 07Thalassi   | SLYLDISPDV | KLNWKIQRDM | EERGHSLSEI  | MASIEARKPD | FDAFIEPQKK  | FADYVIEVLP   |             |
| 05odontella  | SLYLDISDEV | KLNWKIQRDM | EERGHSLSEI  | LASIEARKPD | FDAYIAPQKE  | FADLTIEVLP   |             |
| 06Phaeodact  | SLYLDISDDV | KLNWKVQRDM | EERGHSMESI  | LASIEARKPD | FDAYIDPQKQ  | LADLIEVLP    |             |
| 08Vaucheria  | TIYLDISDEI | KFAWKIQRDM | MERGHSLSEI  | QASIEARKPD | FDAYIAPQRA  | QADVVLQVLP   |             |
| 09Ectocarpus | TIYLDISDEI | KFAWKIQRDM | MERGHSLSEI  | QASIEARKPD | FDAFIAPQRS  | EADVVIQVLP   |             |
| 43Galdieria  | TVYLDISDEV | KVAWKIQRDM | AERGHKLENI  | LASIESRKP  | FQQYIDPQKK  | DAVAVIQVLP   |             |
| 13Microm_p   | KIYLDISDDV | KFAWKIQRDM | AERGHSLSEI  | KASIEARKPD | FDEFVDPQKQ  | YSDVIIQVLP   |             |
| 14Microm_stn | KIYLDISDDV | KFAWKIQRDM | AERGHSLSEI  | KASIEARKPD | FDEFVDPQKQ  | YADIVIQVLP   |             |
| 15ostreoc_l  | KIYLDISDDV | KFAWKIQRDM | AERGHSLSEI  | KASIEARKPD | FDAFVDPQKE  | HADV VIEVLP  |             |
| 16ostreoc_t  | KIYLDISDEV | KFAWKIQRDM | AERGHSLSEI  | KASIEARKPD | FDAFVDPQKE  | FSDVIIQVLP   |             |
| 17Chlorella  | KIYLDISDEV | KFAWKIQRDM | KERGHSLSEI  | KASIEARRPD | FDAYIDPQKK  | HADV IIVQVLP |             |
| 18Chlorel_sp | RIYLDISDEI | KFAWKIQRDM | AERGHSLSEI  | KASIEARKPD | FDAYIDPQKK  | KADMI IQVLP  |             |
| 19Chlamydom  | KIYLDISDDI | KFAWKIQRDM | AERGHSLSEI  | KSSIAARKPD | FDAYIDPQKK  | DADMI IQVLP  |             |
| 20Volvox     | KIYLDISDDI | KFAWKIQRDM | AERGHSLQAI  | KSSIEARKPD | FDAYIDPQKK  | DADMI IQVLP  |             |
| 27Oryza_s2   | SIYLDISSDI | KFAWKIQRDM | AERGHSLSEI  | KASIEARKPD | FDAYIDPQKQ  | YADAVIEVLP   |             |
| 34Closterium | SIYLDISDEV | KFAWKIQRDM | AERGHSLSEI  | KASIQARKPD | FDAYIDPQKQ  | HADV VIEVLP  |             |
| 26Arabidopsi | SIYLDISNEV | KFAWKIQRDM | AERGHSLSEI  | KASIEARKPD | FDAFIDPQKQ  | YADAVIEVLP   |             |
| 24Zea_mays   | SIYLDISDEV | KFAWKIQRDM | AERGHSLSEI  | KASIEARKPD | FDAYIDPQKQ  | YADAVIEVLP   |             |
| 23Oryza_sl   | SIYLDISDEV | KFAWKIQRDM | AERGHSLSEI  | KASIEARKPD | FDAFIDPQKQ  | YADAVIEVLP   |             |
| 25Triticum   | SIYLDISNEV | KFAWKIQRDM | AERGHSLSEI  | KASIEARKPD | FDAFIGPQKQ  | YADAVIEVLP   |             |
| 31Selaginell | SIYLDISDAV | KFAWKIQRDM | AERGHSLSEI  | KASIAARKPD | FDAYIDTQKQ  | YADV VIEVLP  |             |
| 29Spinacia   | SIYLDISNEV | KFAWKIQRDM | KERGHSLSEI  | KASIESRKP  | FDAYIDPQKQ  | HADV VIEVLP  |             |
| 30Beta_vu    | SLYLDISNEV | KFAWKIQRDM | KERGHSLSEI  | KASIEARKPD | FDAYIDPQKQ  | YADV VIEVLP  |             |
| 22Populus    | SIYLDISNEV | KFAWKIQRDM | AERGHSLSEI  | KASIEARKPD | FDAYIDPQKQ  | YADAVIEVLP   |             |
| 28Pisum_sa   | SIYLDISNEV | KFAWKIQRDM | AERGHSLSEI  | KASIEARKPD | FEAYIDPQKQ  | YADAVIEVLP   |             |

|                 |            |            |             |             |            |            |
|-----------------|------------|------------|-------------|-------------|------------|------------|
| 21Arteminis     | SIYLDISDDV | KFAWKIQRDM | AERGHSLSEI  | KASIEARKPD  | FDAYIDPQKQ | YADAVIEVLP |
| 32Physcomi      | SIYLDISDDV | KFAWKIQRDM | AERGHSLSEI  | KASIASRKP   | FDAYIDPQKQ | YADVVIQVLP |
| 33Chara_braunii | SVYLDISDDV | KFAWKIQRDM | AERGHSLSEI  | KASIAARKPD  | FDAYIDTQKQ | YADVVIQVLP |
| 36Gloeochaete   | SIYLDLSDEV | KLAWKVQRDM | AERGHRLIEDI | WASIESGKPD  | FSAYFDPQKE | NADVMAQLLR |
| 37Cyanophora    | SIYLDLSDEI | KLAWKVQRDM | AERGH-----  | -----       | -----      | -----      |
| 35Glaucocyst    | TVYLDLSDEV | KLAWKIQRDM | AERGHQLEDI  | LRSEIARKPD  | FAAYIDPQKQ | YADVVMQILP |
| 47Synechoco     | SVYLDIDDEV | KIAWKIQRDM | AERGHSYEDV  | LASIEARRPD  | FKAYIEPQRG | HADIVIRVMP |
| 54Nostoc_pun    | SVYFDISDEV | KIAWKIQRDM | AERGHRYEDV  | LAQINSRKP   | FEKFIEPQRE | FADVVLQVLP |
| 55Nodularia     | SVYFDISDQV | KIAWKIQRDM | AERGHRYEDV  | LAQINSRKP   | FEKFIEPQRE | FADVVLQVLP |
| 52Nostoc_sp     | SVYFDISDEV | KIAWKIQRDM | AERGHRYEDV  | LAAINSRKP   | FQKYIEPQRE | FADVVLQVLP |
| 53Anabaena_v    | SVYFDISDEV | KIAWKIQRDM | AERGHRYEDV  | LAAINSRKP   | FQKYIEPQRE | FADVVLQVLP |
| 56Synech2       | SVYLDISDEV | KINWKIQRDM | AERGHYEDV   | LAAINARKPD  | FEAYIDVQKQ | YADVVIQILP |
| 46Microcys      | SVYLDISDEV | KVNWKIQRDM | AERGHYDDV   | MAAINSARKPD | FSAYIDPQRQ | YADVVIQVLP |
| 48Microco_ch    | GVYLDISDEV | KINWKIQRDM | AERGHYEDI   | LASINARRPD  | FSAYIEPQKE | FADVVIQILP |
| 45Cyanothe      | GVYLDISDEV | KINWKIQRDM | AERGHSYDDV  | LASINARKPD  | FTAYIEPQKE | HADVVIQVLP |
| 49Synechl       | GVYLDISEEV | KINWKIQRDM | AERGHYEDI   | LASINARKPD  | FTAYIEPQKQ | YADVVIQVLP |
| 57Trichodes     | SVYLDIGDEV | KIAWKIKRDL | AERGHRYEDV  | LASINARRPD  | FESYIDPQKV | HADVVIQVLP |
| 58Lyngbya       | SVYLDISDEV | KIAWKIQRDM | AERGHRYEDV  | LASINARRPD  | FEAYIDTQKQ | YANVVIQILP |
| 50Thermosyn     | SVYLDISDDV | KIAWKIKRDM | AERGHSYEDV  | IASINARRPD  | FMAYIDPQKQ | YADVVLQILP |
| 51Acaryochl     | SVYLDISDEV | KIAWKIQRDM | AERGHYEDV   | LASINARRPD  | FEAYIDPQKQ | HADVVIQILP |

181

|              |            |            |            |            |            |            |
|--------------|------------|------------|------------|------------|------------|------------|
| 01Lth_prk    | TKLDPGEETK | FLCTRLIQKE | NTHGIRPVYL | FECAKVDWD  | PCPNSMACPY | PGTRVRYEE  |
| 40Gymnochl   | TKLDAGEETK | FLCTRLIQKE | NSHGVRPVYM | FEEGANVDWD | PCPGTMVCPY | PGTRVRYSE  |
| 38Chlorarac  | TKLDPGEETK | FLNTRLIQKE | NTHGVRPVFM | FEEGANVDWD | PCPGAMACPY | PGTRVRYGE  |
| 39Bigelowi   | TKLDPGEETK | YLNTRLIQRE | NQHGIRPVYM | FEEGSTVDWD | PCPGAMACPY | PGTRVRYNE  |
| 10Prymnesi   | SDLIDDPTGK | FLKVRLITKN | NLKHISPAYL | MDEGASITWK | PNPNKLTSTA | PGVLFKSYQD |
| 11Emiliani   | SDLIEDPTGK | FLKVYIQKK  | SVTCAETPYL | FDEGSELTWV | PNGDKLTTSP | PGVVIKSYDD |
| 02Eut        | SDIAPNGPVK | FLKGRFIQKG | GTKNFDPVYL | VEKGSSITWK | PCGDSLQCEY | PGVQFAYYPE |
| 03Euglena    | SRLAETAPLE | YLRVRLIQKT | TTKHFDPVYL | IEKGSSVTWK | PCGDNLQCEY | PGLQLAYYTE |
| 04Guillardia | TNLV--NDKT | HLNVKLIQCK | GVDHYAPTYL | WDEGSDIEWV | PPRNKLASSA | PGLKIYQKTE |
| 41Cschyzon   | TELIEDKERK | ILKVRLQRE  | GVQGFKTAYL | FDEGSTIEWI | PCGRRLTCSY | PGIKFHYGPE |
| 12Pavlova    | TQLVNDAEGK | FLRVRFIQKA | GLDLIKAPFL | FDEGSTIEWT | PCGKKLTCAV | PGIKFRYGTE |
| 44Chondrus   | TRLIDDDEKK | VLRVRLQDE  | NSENFDPIFL | YDEGSTIDWV | PCGRKLTCY  | PGIKFHYGPD |
| 42Porphyrid  | TQLVDDKENK | YLRVQMIQRE | AATNFAKFSI | FDEGSTIDWV | PCGRKLSCSY | PGIKFHYGPD |
| 07Thalassi   | TDL-DKEDKK | TLKVRAIQKK | GVADFTPTYL | FDEGSEIEWA | PSADKLSSPA | PGIKLSYKQE |
| 05odontella  | TQL-DEEDKK | TLRVRCIQKE | GVSDFSPCYL | FDEGSTIAWT | PAPSKLSSSG | PGLTMAYGTE |
| 06Phaeodact  | TRL-DQDDKK | TLRVRCIQKE | GVENFDPCFL | FDEGSSIEWT | PAPTKLSSPA | PGIKLAYYPE |
| 08Vaucheria  | TKLVEDKEGK | ILRTRLIQKE | NVKNFETAYL | FDEGSTINWI | PCGRKLTCFS | PGIKFAYGPD |
| 09Ectocarpus | TQLIGDTEGK | ILRTRMVQKE | GLDFFDPAFL | FDEGSTISWV | PCGRKLTCFS | PGIKFAYGPD |

|                 |            |            |             |            |           |            |
|-----------------|------------|------------|-------------|------------|-----------|------------|
| 43Galdieria     | TRLIDDTEKK | VLRVRLIQRE | GIQGFQSVYL  | YDEGSTIDWI | PCGRKLTCY | PGIKFHYGPD |
| 13Microm_p      | TQLIDDNEGK | ILRVRMIMKE | GVENFDAPYL  | FDEGSTISWI | PCGRKLTCY | PGIKFFYGPD |
| 14Microm_stn    | TQLIDDNEGK | ILRVRMIMKE | GVENFDAPYL  | FDEGSTISWI | PCGRKLTCY | PGIKFFYGPD |
| 15Ostreoc_l     | TQLIDDNEGK | ILRVRMIMKE | NVENFDAPYL  | FDEGSTISWI | PCGRKLTCY | PGIKFFYGPD |
| 16Ostreoc_t     | TQLIDDNEGK | ILRVRMIMKE | GLENFDAPFL  | FDEGSTISWI | PCGRKLTCY | PGIKFFYGPD |
| 17Chlorella     | TQLIDEKEGK | VLRVRFIQKE | GVNFFKPTFL  | FDEGSTISWI | PCGRKLTCY | PGIKFFYGPD |
| 18Chlorel_sp    | TQLVDEKEGK | ILRVRLIMKD | GKKLFDPVYL  | FDQGSTVSWI | PCGRKLTCY | PGIKMFYGPD |
| 19Chlamydom     | TQLVDDK-GQ | YLRVRLIMKE | GSKMFDPVYL  | FDEGSTISWI | PCGRKLTCY | PGIKMFYGPD |
| 20Volvox        | TQLVDDK-GQ | YLRVRLIQKE | GSKMFDPVYL  | FDEGSTISWI | PCGRKLTCY | PGIKMFYGPD |
| 27Oryza_s2      | TRLIDGDEGK | VLRVKLIMKE | GVEHFAPAYL  | FDEGSTISWI | PCGRKLTCY | PGIKFSYFPD |
| 34Closterium    | TQLIDDNEGK | ILRVRMIQKE | GLDNFDPVYL  | FDEGSSISWI | PCGRKLTCY | PGIKFYYGPD |
| 26Arabidopsi    | TTLIDDNEGK | VLRVRLIMKE | GVKYFSPVYL  | FDEGSTISWI | PCGRKLTCY | PGIKFNYEPD |
| 24Zea_mays      | TQLINDDEGK | VLRVKLIMKE | GVDNFPVYL   | FDEGSTISWI | PCGRKLTCY | PGIKFAYGPD |
| 23Oryza_sl      | TQLIDDNEGK | VLRVKLIMKE | GKKNFNPVYL  | FDEGSSITWV | PCGRKLTCY | PGIKFAYGPD |
| 25Triticum      | TQLIDDNEGK | VLRVKLIMKE | GKFFNPVYL   | FDEGSTINWI | PCGRKLTCY | PGIKFSYGPD |
| 31Selaginell    | TQLIDDNEGK | VLRVRMIMKE | GVDNFEPVYL  | FDEGSTISWI | PCGRKLTCY | PGIKFFYGPD |
| 29Spinacia      | TELIDDDEGK | VLRVRMIQKE | GKFFNPVYL   | FDEGSTISWI | PCGRKLTCY | PGIKFSYGPD |
| 30Beta_vu       | TQLIDDDEGK | VLRVRMIQKE | GKFFNPVYL   | FDEGSTISWI | PCGRKLTCY | PGIKFSYGPD |
| 22Populus       | TQLIDDNEGK | VLRVKLIMKE | GVEFFSPVYL  | FDEGSSISWI | PCGRKLTCY | PGIKFSYGPD |
| 28Pisum_sa      | TQLIDDNEGK | ILRVRLIQKA | GVKYFSPVYL  | FDEGSTISWI | PCGRKLTCY | PGIKFFYGP  |
| 21Arteminis     | TQLIDDNEGK | VLRVKLIMKE | GVKYFSPVYL  | FDEGSTISWI | PC-----   | -----      |
| 32Physcomi      | TQLIDDNEGK | VLRVRMIMKE | GVPFFEPVYL  | FDEGSTISWI | PCGRKLTCY | PGIKFFYGPD |
| 33Chara_braunii | TQLIDDNEGK | ILRVRMIMKE | GLENFVPAYL  | FDEGSTVSWV | PCGRKLTCY | PGIKFFYGPD |
| 36Gloeochaete   | KVLFEDLKGG | VLGGKWPQRG | GGRPFDPVYL  | YDEGSTITWI | PCGRKLTCY | PGIKFFYGP  |
| 37Cyanophora    | -----      | -----      | -----       | -----      | -----     | -----      |
| 35Glaucocyst    | TQLIDDTERK | VLRVRLIQRR | VFLVLTPTFH  | SMRAPPLTGF | H-GRKLTCY | PGIKFFYGPD |
| 47Synechoco     | TQLINDTERK | VLRVQLIQRE | GRDGFEPAYL  | FDEGSTIQWT | PCGRKLTCY | PGIRLAYGPG |
| 54Nostoc_pun    | TNLINDTERR | VLRVRMLQRE | GKEGFDPTYL  | FDEGSTINWT | PCGRKLTCY | PGMQLYYGSD |
| 55Nodularia     | TNLINDTERK | VLRVRMLQRE | DKEGFEPPTYL | FDEGSTINWT | PCGRKLTCY | PGMQVYYGSD |
| 52Nostoc_sp     | TNLIDDTERK | VLRVRMLQRE | GKEGFEPAYL  | FDEGSTINWT | PCGRKLTCY | PGMQLYYGSD |
| 53Anabaena_v    | TNLIDDTDRK | VLRVRMLQRE | GKEGFEPAYL  | FDEGSTINWT | PCGRKLTCY | PGMQLYYGSD |
| 56Synech2       | TNLINDKENK | ILRVRLIQRE | GIEGFEPVYL  | FDEGSTINWI | PCGRKLTCY | PGLRMQYGP  |
| 46Microcys      | TQLLEDHESK | LLRVRLIQKE | GVENFEPAYL  | FDEGSTIDWR | PCGRKLTCY | PGIKLYYGP  |
| 48Microco_ch    | TQLIDDKECK | ILRVRLVQKE | GVEGFEPVYL  | FDEGSTIDWR | PCGRKLTCY | PGIKLYYGP  |
| 45Cyanothe      | TQLIEDHESK | LLRVRLVQKE | GVANFEPAYL  | FDEGSTIDWR | PCGRKLTCY | PGIKMYGPD  |
| 49Synechl       | TRLIEDKESK | LLRVRLVQKE | GKFFEPAYL   | FDEGSTIDWR | PCGRKLTCY | PGIKMYGPD  |
| 57Trichodes     | TKLINDQEHK | VLRVRLIQRE | GKKNFDPVYL  | FDEGSTINWI | PCGRKLTCY | PGIKMFYGPD |
| 58Lyngbya       | TQLIDDKERK | VLRIRLVQRE | GIEGFEPAYL  | FDEGSTIYWT | PCGRKLTCY | PGIKMYGPD  |
| 50Thermosyn     | SQLAEKVG   | ILRVRLQRE  | GIPGFEPVYL  | FDEGSTITWI | PCGRKLTCY | PGIRLSYGP  |
| 51Acaryochl     | TQLLEEKPGS | ILRVRLIQKD | GVPDFAPVYL  | FDEGSTINWV | PCGRKLTCY | PGIRMYGPD  |

|              |            |             |             |            |            |            |
|--------------|------------|-------------|-------------|------------|------------|------------|
| 01Lth_prk    | VAQEKNAHVI | EIDGVFGEIE  | ELFYIEERLS  | NTNTKYFGEL | TKQMIKNKSS | PGSGDGSGLI |
| 40Gymnochl   | MNQGKHSNVL | EVDGVFGETE  | ELFIIIEERLS | NTNTKYFGEL | TKQMIKNKQA | PGSGDGSGLI |
| 38Chlorarac  | MHGERPASVL | EVDGVFGDTE  | ELFFIEERLS  | NTNTKYFGEL | TKQMLKNKAA | PGSGDGSGLI |
| 39Bigelowi   | MSGEKHAHVL | EVDGVFGETE  | ELFFIEERLS  | NTNTKYFGEL | TKQMLKNKAA | PGSGDGSGLI |
| 10Prymnesi   | EWFGQSVSVL | EMDGKIDSLE  | ELIYVESQLC  | NTGTKYYGEL | TEQMVNKAS  | PGSENGSGLF |
| 11Emiliani   | EWFGAPVSVL | EMDGKVDVLD  | ELVYVESAIS  | ATGTKFYGEL | TEQMIMKDA  | PGSENGTGLF |
| 02Eut        | EYMGNKVEVL | EMDGVISNLK  | EGLYVEKFLH  | NTAAKEFGEL | TQELMKLKSS | PGGDNGTGFM |
| 03Euglena    | EYMGHPAEVL | EMDGVIHNLK  | EGLYVEKFLH  | NTGAKEFGEL | TQELLKGQNS | PGGDNGTGFM |
| 04Guillardia | KWAGKDAAVI | GMDGKYDKID  | EMMYVEKQFA  | STGSKFVGEI | TKKMLEYEGQ | PGSNDGTGFL |
| 41Cschyzon   | SFYGADFSTI | EVDGEFAKLE  | ELVYIESHLS  | NTGTKYYGEL | TQLMLAAQNT | PGAYNGTALF |
| 12Pavlova    | MYMGSEVTVL | EMDGRFDKLD  | ELIYVESALT  | NTGAKFYGEL | TQQILKNKDA | VGSDNGTGFF |
| 44Chondrus   | TYYDKEVAVF | EVDGGFEKLD  | EMVYVETHIE  | RAGTKFFGEI | TQSLLRNPTA | PGSKNGTGLI |
| 42Porphyrid  | SYFGEDVTVL | EMDGVVEKLD  | EMIYVESHLN  | NTETKFGYEM | TQQLLNPTA  | PGTFNGTGLF |
| 07Thalassi   | QYFGADVAVV | EMDGTFDNIQ  | ELVYVESNLG  | NTNSKFYGEV | TQAMLSLADS | PGSNNGTGLM |
| 05odontella  | DYYGKPAQVV | EMDGTFDNIQ  | ELVYVESQLS  | NTSTKFYGEL | TQAMLKLADA | PGSNNGTGLM |
| 06Phaeodact  | EFFGKDAQVL | EMDGNFDNIQ  | ELVYVESALS  | NTTKFYGEM  | TQAMLALATA | PGSNNGTGLM |
| 08Vaucheria  | TYFDNEVSVL | EMDGQFDNLQ  | ELIYVEGFLS  | NTGTKFYGEL | TQNILKLSDS | PGSNNGTGLF |
| 09Ectocarpus | TYYDNEVSVI | EMDGQFDNLQ  | ELIYVESHLS  | NIGTKFYGEL | TQNILKQADS | PGSNNGTGLF |
| 43Galdieria  | NWYNHDVSVL | EVDGNFEKLE  | ELIYIESHLN  | NTSTKFYGEI | TQQLLRNSSA | PGSNNGTGLF |
| 13Microm_p   | TFFGEEVSVL | EMDGQFDKLE  | ELIYVESHLS  | NTSTKFYGEI | TQQMLKYQNG | PGSNNGTGLF |
| 14Microm_stn | TFFGEEVSVL | EMDGQFDKLE  | ELIYVESHLS  | NTSTKFYGEI | TQQMLKYQNG | PGSNNGTGLF |
| 15ostreoc_l  | TYYGKEVTVL | EMDGQFDKLE  | ELIYVESHLS  | NTSSKFYGEI | TQQMLKYQNG | PGSNNGTGFF |
| 16ostreoc_t  | TFYGKEVTVL | EMDGQFDKLE  | ELIYVESHLS  | NTSTKFYGEI | TQQMLKYQNG | PGSNNGTGFF |
| 17Chlorella  | TYYGEEVSVL | EMDGQFDKIE  | ELIYVESHLS  | NTSAKFYGEI | TQQMLKNSQF | PGSTNGTGLF |
| 18Chlorel_sp | TYYGEEVSVL | EMDGQFDKLE  | ELIYMESHLS  | NTSAKFYGEI | TQQMLKNSSF | PGSNNGTGLF |
| 19Chlamydom  | TWYGQEVSVL | EMDGQFDKLE  | ELIYVESHLS  | NTSAKFYGEI | TQQMLKNSGF | PGSNNGTGLF |
| 20Volvox     | TWYGQEVSVL | EMDGQFDKLE  | ELIYVESHLS  | NTSAKFYGEI | TQQMLKNSGF | PGSNNGTGLF |
| 27Oryza_s2   | TYFGHEVSVL | EMDGKFDKLD  | ELIYVESHLS  | NLSTKYYGEV | TQQMLKHADF | PGSNNGTGLF |
| 34Closterium | TYFGNEVSVL | EMDGQFDKLE  | ELIYVESHLS  | NTSTKFYGEV | TQQMLKNSDF | PGSTNGTGLF |
| 26Arabidopsi | SYFDHEVSVL | EMDGQFDRLD  | ELIYVESHLS  | NLSTKFYGEV | TQQMLKHADF | PGSNNGTGLF |
| 24Zea_mays   | IYFGNEVSVL | EMDGQFDRLD  | ELIYVESHLS  | NLSTKFYGEV | TQQMLKHADF | PGSNNGTGLF |
| 23Oryza_sl   | TYFGHEVSVL | EMDGQFDRLD  | ELIYVESHLS  | NLSTKFYGEV | TQQMLKHADF | PGSNNGTGLF |
| 25Triticum   | TYFGQEVSVL | EMDGQFDRLD  | ELIYVESHLS  | NLSTKFYGEV | TQQMLKHADF | PGSNNGTGLF |
| 31Selaginell | TYYDNEVSVL | EMDGQFDKLD  | ELIYVESHLS  | NISTRFYGEI | TQQMLKHADF | PGSNNGTGLF |
| 29Spinacia   | TFYGNVTVV  | EMDGMFDRLD  | ELIYVESHLS  | NLSTKFYGEV | TQQMLKHQNF | PGSNNGTGFF |
| 30Beta_vu    | TYYGNVTVL  | EMDGI FDRLD | GLIYV-----  | -----      | -----      | -----      |
| 22Populus    | AYYGHEVSVL | EMDGQFDRLD  | ELIYVESHLS  | NLSTKFYGEV | TQQMLKHADF | PGSNNGTGLF |
| 28Pisum_sa   | TYKGNVSVV  | EMDGQFDRLD  | ELIYVESHLS  | NLSSKFYGEV | TQQMLKHADF | PGSNNGTGLF |

|                 |            |            |            |            |            |            |
|-----------------|------------|------------|------------|------------|------------|------------|
| 21Arteminis     |            |            |            |            |            |            |
| 32Physcomi      | TYYGNEVSVL | EMDGQFDKLD | ELIYVESHLS | NISTKFYGEI | TQQMLKHADF | PGSNNGTGLF |
| 33Chara_braunii | TYYGQEVSVL | EMDGQFDKLE | ELIYVESHLS | NTSTKFYGEI | TQQMLRHADF | PGSNNGTGLF |
| 36Gloeochaete   | TSYGREVSVL | EMDGGFEKLE | ELIYFESLLN | NTNTKYYGEF | TQQLLKNQSF | PGSTNGTGLF |
| 37Cyanophora    |            |            |            |            |            |            |
| 35Glaucocyst    | TWYGNEVSVL | EMDGSFDKLE | ELIYVESHLS | NTSTKYYGEL | TQQILKNQSF | PGSGNGTGLF |
| 47Synechoco     | TYYGHGVSVL | EVDGQFENLE | EMIYVEGHLs | KTDTQYYGEL | THLLPQHKDY | PGSNNGTGLF |
| 54Nostoc_pun    | VYYGRYVSVL | EVDGQFDNLE | EVIYIETHLS | NTSTKYQGEL | THLLLQHREY | PGSNNGTGFF |
| 55Nodularia     | VYYGRYVSVL | EVDGQFDNLD | EVIYVETHLS | KTSTKYESEM | THLLLQHREY | PGSNNGTGLF |
| 52Nostoc_sp     | VYYGRYVSVL | EVDGQFDNLE | EVIYIETHLS | NTSTKYQGEL | TQLLLQHREY | PGSNNGTGFF |
| 53Anabaena_v    | VYYGRYVSVL | EVDGQFDNLE | EVIYIETHLS | NTSTKYQGEL | TQLLLQHREY | PGSNNGTGFF |
| 56Synech2       | SYFGNEVSVL | ELDGEFDRLE | EVIYVESHLS | NTSTNHYGEM | TELLLNHRDY | PGSNNGSGLF |
| 46Microcys      | GFLGNEVSIL | ELDGQFDNLE | EMIYIESHLS | KTGTKYYGEM | TELLLKHKDY | PGSTNGTGLF |
| 48Microco_ch    | SYFGHDVSVL | EVDGQFDNLE | EMIYIESHLS | NTSTKYYGEM | TELLLKHKDY | PGSNNGSGLF |
| 45Cyanothe      | NFMGNEVSIL | EVDGQFDNLE | EMIYIESHLS | KTGTKYYGEM | TELLLQHKDY | PGSTNGTGLF |
| 49Synechl       | NFMGNEVSL  | EVDGRFENLE | EMVYVENHLS | KTGTKYYGEM | TELLLKHKDY | PGTDNGTGLF |
| 57Trichodes     | SYDGNEVSIL | EVDGNFDNLE | EMIYVEGHLs | NTSTKYYGEM | THAMMKHQDY | PGSNNGSGLF |
| 58Lyngbya       | ASYGNEVSIL | EVDGKFDNLD | EMIYVEGHLs | NISTKYYGEL | THMMREHQDY | PGSDNGSGLF |
| 50Thermosyn     | EYYGHPVSVL | EVDGRFEKLD | ELIYIESHLS | NTSTKHGVEV | TELLLKHRDY | PGSDNGSGLF |
| 51Acaryochl     | DYYGNAVSVL | EVDGQFEKLD | EVIYIEGHLs | NTSTKFEGEM | TELLLKHRDY | PGSNNGSGLF |

301

|              |            |         |
|--------------|------------|---------|
| 01Lth_prk    | QALVALKMRE | SYERFGR |
| 40Gymnochl   | QALVALKMRE | SYERFGR |
| 38Chlorarac  | QALVALKMRE | SYERFGR |
| 39Bigelowi   | QALVALKMRE | SYERFGR |
| 10Prymnesi   | QTICAFKIRE | AFEAIA- |
| 11Emiliani   | QSICAFKIRE | AYESLK- |
| 02Eut        | QTLAALKIRE | IYERTGE |
| 03Euglena    | QTLAALKIRE | IYERAGE |
| 04Guillardia | QTITALKVRE | VYEGIKV |
| 41Cschyzon   | QTIIALKIRE | IYEQLGR |
| 12Pavlova    | QTLCSFKIRE | AYEKAGK |
| 44Chondrus   | QVIMAMMRS  | VYEKVGK |
| 42Porphyrid  | QVLIALKMRE | VYEKCGR |
| 07Thalassi   | QTLAFAIRE  | LYNKKAA |
| 05odontella  | QTLAFAIRE  | LYEKKAA |
| 06Phaeodact  | QTLAFAIRD  | IYEKKAA |
| 08Vaucheria  | QTVIALKLRE | IYEKITS |
| 09Ectocarpus | QTLVALKLRE | VYERIKK |

|                 |             |         |
|-----------------|-------------|---------|
| 43Galdieria     | QVLTALKMRQ  | LYEELGK |
| 13Microm_p      | QTLCLGLKVRE | LYERIEK |
| 14Microm_stn    | QTLCLGLKVRE | LYERIEK |
| 15Streoc_l      | QTIVGLKVRE  | VYERIGK |
| 16Streoc_t      | QTIVGLKVRE  | VYERIEK |
| 17Chlorella     | QTIVGLKIRE  | VYEAVDT |
| 18Chlorel_sp    | QTIVGLKCRE  | VYERIQK |
| 19Chlamydom     | QTIVGLKVRE  | VYERIKK |
| 20Volvox        | QTIVGLKVRE  | VYERIKK |
| 27Oryza_s2      | QTIVGLKIRD  | LYEQVAE |
| 34Closterium    | QTMVGLKLRE  | AYERISK |
| 26Arabidopsi    | QTIVGLKIRD  | LYEQLAN |
| 24Zea_mays      | QTIVGLKIRD  | LYEQIAE |
| 23Oryza_s1      | QTIVGLKIRD  | LYEQIAE |
| 25Triticum      | QTIVGLKIRD  | LYEQIAE |
| 31Selaginell    | QTIVGLKIRD  | VFERITS |
| 29Spinacia      | QTIIGLKIRD  | LFEQLAS |
| 30Beta_vu       | -----       | -----   |
| 22Populus       | QTIVGLKIRD  | LFEQIAS |
| 28Pisum_sa      | QTIVGLKIRD  | LFEQIAS |
| 21Arteminis     | -----       | -----   |
| 32Physcomi      | QTICGLKIRE  | VYERIEK |
| 33Chara_braunii | QTIVGLKIRE  | VYERIAK |
| 36Gloeochaete   | RGLLGFKIRK  | LYEKF-- |
| 37Cyanophora    | -----       | -----   |
| 35Glaucocyst    | QVLLGLKIRK  | IYEKL-- |
| 47Synechoco     | QVLTGLKMRA  | AYERLSQ |
| 54Nostoc_pun    | QVLTGLKMRA  | AYERLAT |
| 55Nodularia     | QVLTGLKMRA  | AYERLTK |
| 52Nostoc_sp     | QVLTGLKMRA  | AYERLTK |
| 53Anabaena_v    | QVLTGLKMRA  | AYERLAK |
| 56Synech2       | QVLVGLKMRA  | TYEKLTA |
| 46Microcys      | QVLVGLKMRE  | TYEKLAA |
| 48Microco_ch    | QILVGLKMRS  | TYERLTS |
| 45Cyanothe      | QVLVGLKMRE  | TYEKLTA |
| 49Synechl       | QVLVGLKMRE  | VYEQLTA |
| 57Trichodes     | QVLVGLKMRA  | TYESLAT |
| 58Lyngbya       | QVLVGLKMRA  | TYERLGS |
| 50Thermosyn     | QVLTGLKMRA  | TYERLSR |
| 51Acaryochl     | QVIAGLKMRA  | TYEKLAT |

10-PRK. txt



## Alignment: SBP

|                 |             |            |             |            |            |             |
|-----------------|-------------|------------|-------------|------------|------------|-------------|
| Gymnochlora     | veeflsnsep  | klqkavmamf | nackeigyki  | rtascdkqac | fnafgdeqla | idvladnvif  |
| Thalassiosira   | -----       | -----      | -----       | -----      | -NSSGDEQLH | LDIDCDKAVF  |
| Pinus           | -----       | NLSRLLVCMG | EAIRTI AFKV | RTASCGATSC | INTFGDEQLA | VDLIANKLLF  |
| Galdieria       | -----       | -----      | -----       | -----      | -----      | -----       |
| Cyanophora      | -----       | -----      | -----       | -----      | -----      | -----       |
| Guillardia      | LDEVLMKDE   | GVRQVTREML | DAAVKITEAL  | RVNLVTVADA | QNSFGDVQLG | VDVIADNIMW  |
| Prymnesium      | LEEVLMSDK   | DLGSVIKTMF | DACGTITEAL  | RKELVTVAEK | QESFGDVQLG | VDVLADDLMW  |
| Lingulodinium   | IEEVMELKDP  | KLQGMVKELL | AACVKITEAL  | RVNLVTVNDS | SNTFGDTQLT | VDVIADLLW   |
| Euglena         | LEDFMKVPDP  | KLRIIMATMA | ESGRTIDHKV  | TTASCGGTAC | TNVFGDEQLA | VDMLADKVLf  |
| Marchantia      | LEEFLFTKNI  | NLRQLMLSMG | LAIKKISFKV  | RTASCGATAC | VNTFGDEQLA | VDMLANKVLf  |
| Chondrus        | LEDWLQEKD-  | -LGKCTRGIF | AACKEVAYKI  | RTASCDKMSC | FNDFGDEQLA | IDVLADKVI f |
| Porphyra        | LEEFLAGSDP  | KLAKCVAAMF | ASCKEVAYKI  | RTASCDKMAC | FNDFGDEQLA | IDMLADKIIF  |
| Arabidopsis     | leeflatpdk  | glrtllmcmg | ealrtiafkv  | rtascggtac | vnsfgdeqla | vdmladklff  |
| Spinacia        | leeflattdk  | glirlmcmg  | ealrtigfkv  | rtascggtqc | vntfgdeqla | idvladklff  |
| Oryza           | leefltpdk   | nlirllcmg  | eamrtisfkv  | rtascggtac | vnsfgdeqla | vdmladklff  |
| Triticum        | leefltpdk   | nlirllcmg  | eamrtiafkv  | rtascggtac | vnsfgdeqla | vdmladklff  |
| ChlamydomonasSP | laeflatpdt  | klrqlmtsms | eatrtiahkv  | rtascggtac | vnsfgdeqla | vdmvadgilf  |
| Bigelowiella    | ieeflantep  | klqkaimgmf | sackeigyki  | rtascdkqac | fnafgdeqla | idvladnvif  |
| TrypanoB        | itdtlrgvpc  | dvvgivetva | gacraiaagl  | rndgvtaaks | knnfgddvls | vdvmdakiis  |
| TrypanoC        | fleelegvps  | svadvvaaia | eacreisidl  | rtdtvrvaga | nnsfgdevls | vddmaekhis  |
| Neurospora      | lasllpsrds  | lrtsvlpdll | tsiaatstal  | r-aaqdvags | snsfgddqln | vdvlaeeair  |
| Gibberella      | lktvlpdrss  | lresvipqll | davsaignel  | r-rsydvgt  | enafgdeqln | vdvlaeniir  |
| Magnaporthe     | ldslvparae  | ltgsvlpalv | haigdvsall  | r-rahtvgt  | tnafgdqqln | vdlaaddvir  |
| Zeamays         | LEEFLTPDK   | NLIRLLICMG | EAMRTIAFKV  | RTASCGGTAC | VNSFGDEQLA | VDMLANKLLF  |
| Physcomitrella  | leeflattdk  | nlarllvcmg | ealrtiafkv  | rtascgatac | vntfgdeqla | vdmladklff  |
| ChlamydoR       | LAEFLVTPDP  | KLRQLMMSMA | EATRTIAHKV  | RTASCAGTAC | VNSFGDEQLA | VDMVADKLLF  |
| Volvox          | laeflvtpdp  | klrqlmmsma | eavrtighkv  | rtascagtac | vnsfgdeqla | vdmvadklff  |
| schyzo1         | LHEFLAEEDK  | ELAKAIEALF | MACKVVGVEV  | RTASCNKEEC | VNAFGDQQLA | VDLLADRTIE  |
| schyzo2         | LENFLEVKDP  | DLRQIVHAIA | EASVSIDQVL  | RSSSAVAPGQ | QHNFGDAQLS | EDLTADHLAR  |
| Emiliana        | -----       | -----      | -----       | -----      | -----      | -----       |
| Phaeodactylum   | ladvlgcmde  | tlricitdml | dvcaditeal  | rtalvtvegn | indfgdaqls | vdmiadnliw  |
| Toxoplasma      | ldqllkgadq  | tltdlilail | drcgkiasal  | qgtsvdkvgs | vnefgdeqlt | vdviaenllw  |
| Neospora        | -----       | -----      | -----       | -----      | -----      | -----       |
| Tetrahymena     | -----       | -----      | -----       | -----      | --afgdiqle | cdtksdeiif  |
| Paramecium      | mhsqhv sddp | elsavcsall | lafiensrvl  | rycsgggtnt | qndfgdhqle | mdvqcelnvn  |
|                 | enlkasgava  | taseeepete | vnmggdgysv  | afdpldgssi | idtnfavgti | fgvwpgsklt  |
|                 | HAIREAGVFA  | VAASEETPEE | TDVLGPWYSV  | GFDPLDGSSV | IDANFSVGST | FGLWPGKGLL  |

```

ESLRYSHFCK YACSEENPEP EDMGGPGFSV AFDPLDGSSI VDTNFTVGTI FGVWPGDKLT
-----
-----TRGKYVS AFDPLDGSSI IDTNFAVGTI FGVWPGKDLV
DAAKASKVVK EAASEEEPVL VETNNGRFTI CWDPLDGSSI VDNNWAVGTM IGIWDKKTML
EVCKTDPLIK EGASEEEPEV REMHDGKFCI CWDPLDGSSI VDNNWAVGTI LGIWGAETIL
DLAKSSQLVC EASSEEEPEI VKTNDGQYVL CWDPLDGSSI VDNNWAVGTI VGVWDKSTLL
EGLRHC GVCE IACSEENPVP LPMGDPGYSV CFDPLDGSSI VDTNFAVGTI FGVWPGNKII
EALLHSHVCK YACSEEEPVL VDMGGPGFSV AFDPLDGSSI VDTNFTVGTI FGVWPGDKLT
DNLTESGVVA VASSEELPIE KPITGGKFAV AFDPLDGSSI IDTNFSVGTI FGVWKGDRFV
DNLEASGVVA TASSEEVPEI VTITGAPYSV AFDPLDGSSI IDTNFTVGTI FGVWPGDKLV
ealryshvck yacseevpel qdmggpgfsv afdpldgssi vdtnftvgti fgvwpgdklt
ealnyshfck yacseelpel qdmggpgfsv afdpldgssi vdtnfsvgti fgvwpgdklt
ealeyshvck yacseevpel qdmggpgfsv afdpldgssi vdtnftvgti fgvwpgdklt
ealeyshvck yacseevpel qdmggpgfsv afdpldgssi vdtnftvgti fgvwpgdklt
ealkyshvcs yacseevpep vamggsgysv afdpldgssi vdtnfsvgti fgvwpgdklt
enlrsgava tasseeepte vplggegysv afdpldgssi idtnfavgti fgnlgldplt
ealnsqhvva syvseespsl astasgthsv sydpldgssi itsnftvgsi favwpgntpi
scltgrhvl afvseerptl tstprgmytv sydpldgssi iatnfsvgsi falwpgatpi
lclaqpsvv tasseedpie kpvqaevytv afdpldgssi iapnwtvgti fslwdgtsal
drcakspaik tasseedpve kpardeqyti gfdpldgssi igpnwsvgsi igiwdgvtai
aackscpsvv tasseevpie ealragrytv aydpldgssi iapnwtvgai lgvwdgatal
EALEYSHVCK YACSEEVPEL QDMGGPGFSV AFDPLDGSSI VDTNFTVGTI FGVWPGDKLT
ealrhshvck yacseeevil qdmegegfsv afdpldgssi vdtnftvgti fgvwpgdklt
EALKYSHVCK LACSEEVPEP VDMGGEGFCV AFDPLDGSSI VDTNFAVGTI FGVWPGDKLT
ealkyshvck lacseevpep vdmggegefvcv afdpldgssi vdtnfsvgti fgvwpgdklv
AALRASRVVA IGSSEEQPIE KDLGGSTFAV AWDPLDGSSI VDTNFSVGTI FGVWRGKRLT
SRLQVPCVS YVSSEENPTE QRGPGHKYAV AFDPLDGSSI LESNFSVGS I FGVWRTAELV
-----
-----WAVGTI LGIWGAETIL
davkrstvir egaseedpvv rnvdnkeytv cwdpldgssi vdnnwavgtm igvwpkstll
aqssegsavr avcseedihl qechngefil cwdpldgssi idcnwavgsi vsiwrqgali
-----
-----
nhlkktegeva yglseeqpk1 velggnkyiv tfdpldgssi igcnwtvgti fgiwkndeli
telkktegfvs hsaseetpem kllsggkfiv tfdpldgssi igtnfavgti vaiwksdeli

gikgteqkaa glgvygprtt vtlavddgah efiliddgqw vlsqsfptig egklfapgnl
GRTGREQVAS VVSVYGPRTT LIIALPDVTF EVTLVNDSHW EVSRDKCTLA PKKVFPAGNL
GVTGRDQ-----
---GRDAAA ALVVYGPRTT ISLALKDHVH EFTLVDDGQW VHTNEFHSVE EGKLFAPGNL
GVTGAQQVAA GLGIYGPRTQ FMLS VKNGTH EFTLEQDGSW VHTKEIYEIA EGKLFAPGNL
GATGRDQVTS IVVLYGPRTT ALVACDDGVY EFTCGAGNKW IASREKIQIK KSKIFSPANL

```

|             |             |             |            |             |            |
|-------------|-------------|-------------|------------|-------------|------------|
| GATGRDQKAS  | MVALYGPRTT  | VFVTLDDGVY  | EFTYANGDGW | LCSRERCEIA  | PSKIFAPANM |
| GATGRDQVMS  | LVALYGPRTT  | VFMTMDDGVY  | EFTLGPGNQW | ICSREKIEIK  | KCKIFAPANM |
| GSTGRDLAAS  | GICVYGPRTV  | LCVAFKPGTH  | DFLLGDDGKW | TYVKAYTHIG  | EGKLFAPGNL |
| GVTGREQVAA  | AMGIYGPRTT  | YVLCLAPGTH  | EFLLMDDGTW | QHVKETTIG   | EGKLFSPGNL |
| GQDGHGVVCA  | GLTIYGPRTT  | ITLAIDDGAH  | EFLLIIDGSW | IHTAAFSTVN  | EGKLFAPGNM |
| GTTGRELVAG  | GMVLYGPRTT  | VTLAMDEGAH  | EFLLIIDGSW | VHTATFTSVN  | EGKLYAPGNL |
| gitgqdqvaa  | amgiygprtt  | yvlavkpgth  | efllldegkw | qhvkettea   | egkmfspgnl |
| gvtgrdqvaa  | amgiygprtt  | yvlalkpgth  | efllldegkw | qhvkettein  | egklfcpgnl |
| gvtgqdqvaa  | amgiygprtt  | yialkpgth   | efllldegkw | qhvkdtttig  | egkmfspgnl |
| gvtgqdqvaa  | amgiygprtt  | fvvalkpgth  | efllldegkw | qhvkdttsig  | egkmfspgnl |
| gitgrdqaaa  | gmgygprrtv  | fviainpgth  | efllqddgkw | llvksteeig  | egklfapgnl |
| gikgteqkaa  | glgygprrtt  | itlavdqgah  | eflliddgqw | vlsqsfmsig  | esklfapgnl |
| gltvrmdvas  | vvavygprvv  | lfvgqelgva  | effcgadgew | klakrtaagr  | gatvfspgnl |
| glrvrdmvas  | vvavygprrtv | lfvslrvgvv  | efyygdr--w | trvqngvprrt | latlfapgnl |
| gasprdqiga  | vlgygprrtt  | avvalrpgee  | kfevlsdqew | dliirpsvsya | ptryfapanl |
| eqptekqias  | ilgvfgprrtl | aivalrpvcf  | evslnnshmf | tvarpelrfa  | etryfapanl |
| gqsprrmvaa  | ilgvfgprrtt | aivalrpgig  | efelidgesl | tmvqpnila   | stryfapanl |
| GVTGGDQVAA  | AMGIYGPRTT  | YIVALKPGTH  | EFLLLDEGKW | QHVKDTTIG   | EGKMFSPGNL |
| gitgrdqaaas | amgiygprtt  | yvvainpgth  | efllmddgkw | qhvketteik  | egklfspgnl |
| NITGREQVAA  | GMGIYGPRTV  | FCIALKPGCH  | EFLLMDDGKW | MHVKETTHIG  | EGKMFAPGNL |
| nitgreqaaa  | gmgiygprtv  | fcialkpgth  | efllmddgkw | mhvketteig  | egkmfapgnl |
| GITGRELEAA  | GMAVYGPRTS  | ISVSVRPGTH  | EFLLDVNGMW | VLVQSFYTIN  | EGKLFAPGNL |
| GCQGRDMVAA  | AVTLYGPRLV  | LVVAVDGGVA  | SFRWTSNARW | RLKQWSPDL   | LASLFAPGNL |
| GATGRDQKAS  | LVALYGPRTT  | VFVTLDDGVY  | EFTYANGDGW | LCSRDRIQIS  | QSKIFAPANM |
| gatgrdqvts  | lvalygprrtt | vlvalddgay  | efsygctepw | ictrhkiqin  | hskifspanl |
| qktgrqqvas  | livvygprrtt | gvvavngtal  | dlemkdngkf | ic-rgkpiik  | pakifspanl |
| -----VAS    | LIVVYGPRTT  | GVAVNAGVI   | KAGSLDLGSF | VCRGTPV-IA  | PAKIFSPANL |
| ghktdklias  | gccmygprrtt | aviynektvn  | eyslknkvw  | ilslpnivik  | pgklfapgnl |
| gkrgrdmvsa  | ccclygsrtn  | vvfwneqkiq  | eytlfdgghw | eltdknikik  | pgklfspgnt |
| ratldnpgya  | elfqhwydnq  | yqlrytggmv  | pvnqimvkg  | kgvfvnaask  | nakaklfffy |
| RATNDNPKYD  | ALVKHWISDR  | YTLRYTGGMV  | PDVYHMFASK | GGVFSNVSSD  | KARAKLRLLY |
| -----NPEYE  | KLINYVSEK   | YTLRYTGGMV  | PDVNQIIVKE | KGIFTNVISP  | TSKAKLRLLF |
| RAIQDNPGYS  | RLLQFWLNEK  | YQLRYTGGMV  | PDVNQILVKG | RGVFCNPASA  | SAKAKLRLLY |
| RATMDNANYK  | ALVDYWLREK  | YQLRYTGGMV  | PDVNQILIKG | KGVFCNPASA  | AAPAKLRVLY |
| RCCQEDAGYD  | ALVKHWMEKR  | YTLRYSGLLV  | PDVYQHFTKE | MGVFANPTSP  | KSPAKLRVAF |
| RAAQDLPEYA  | ALIDYWMANK  | YTLRYTGGMLV | PDICQQFTKK | MGVFANPTSE  | SSPAKLRLAF |
| RAAQEVDGYA  | KLIDHYMTNR  | YTLRYSGLLV  | PDVCQQFTKT | QGVFTNPTSK  | ASPAKLRLAF |
| RCTLDNPEYE  | RLISYYTRQQ  | YTLRYTGGMV  | PDVYQILVKE | KGVFTNVISP  | STKAKLRLSF |
| RATYDNPEYE  | KLINYVSEK   | YTLRYTGGMV  | PDVNQIIVKE | KGIFTNVISP  | TTKAKLRLLF |

RAAQDNPGYA KLEHYYSNK YQLRYTGGMV PDVNQILVKG KGVFCNPASP SAKAKLRVLY  
 RAAEDNPGYA DLIDYRKEK FQLRYSGGMV GDVNQILVKG KGVFCNPSSP SAKAKLRLLY  
 ratfdnseys klidyvkek ytlrytggmv pdvnqiivke kgiftnvtsp takaklrllf  
 ratsdnadya kliqyyikek ytlrytggmv pdvnqiivke kgiftnvisp takaklrllf  
 ratfdnpeyd klinyyvkek ytlrytggmv pdvnqiivke kgiftnvtsp takaklrllf  
 ratfdnpdyd klvnyyvkek ytlrytggmv pdvnqiivke kgiftnvtsp takaklrllf  
 raifdnpeys klvsyyleeq ytlrytggmv pdvfqilvke kgvftnvtsp stkaklrllf  
 ratkdnkgye elfnywdnq yqlrytggmv pdvnqimvkg kgvfnaesk aakaklrllf  
 raarhlpwyk qlitmymqeg atlrytggmv pdvcqiivkg dgiymtpasp qhkmlrllf  
 ravmylpwyk elvtsymnsg atlrytggmv advcqiivkg dgiymtpesp hhkvklrllf  
 rstnthaaya klvahymaen ytlrycgglv pdvhalvkg hgvylspvte tskaklrslly  
 raaarendkym slvtkfindk ytlrysggli pdvyhalvkg hgvyvspvts vskaklrkyy  
 raaaecdkys alvshfisq ytlrysgglv pdvhalvkg hgv-----  
 RATFDNPEYD KLINYYVKEK YTLRYTGGMV PDVNQIIVKE KGIFTNVTSP TAKGQLRLLF  
 ratfdnadye klinyyvsek ytlrytggmv pdvnqiivke rgiftnvtsp ttkaklrllf  
 RATFDNPAYE RLINFYLGEK YTLRYTGGMV PDVFQIIVKE KGVFTNVTSP TTKAKLRILF  
 ratfdnpaye rlinfylgek ytlrytggmv pdvfqiivke kgvftnvtsp ttkaklrilf  
 KATQDNPGYA KLVQYWENK YQLRYTGGMV PDCNQILIKG KGVFANPASP SAPAKLRVLY  
 RATQELPPYD RMVRSWIESR YTLRYSGAMA PDVFQIIAKG QGIFCNPSVP G-KAKLRVLY  
 RAAQDLPNYA KLIDYWMTNK YTLRYSGGLV PDICQQFTKR QGVFANPTSE SSPAKLRRAF  
 raaqelpgyk klvdhflenr ytlrytgglv pdvyqqftkg qgvfsnptag gspaklralf  
 raaqdlpayk qliefwmekr ytlrytgglv pdvyqifvkq qgvfcnpask aapaklrmcf  
 RAAQDLPAYK RLIDYWMEKR YTLRYTGGLV PDVYQIFVKQ QGVFCNPASK AAPAKLRMCF  
 raasenpnyr qcinnwidqg ytlrytggmv -----  
 rcivdhipyr evvdywihng ytlrysggma pdicqiflke vgvfscfgda knpsklryly  
  
 eaaptgsiie kaggkffdge qsvfnlevig tearpqvayg sagevarfee  
 EVAAMGLLVE CAGGVTTHEISVLDLEVDD LDRRLGVCF-----  
 EVAPLGMLVE KAGGYSSDG-----  
 ELAPTAFFVE KAGGKSSDGK QSVLDIVIQS TDQRSQVCYG SAGEVERFEE  
 ECAPIAKLIE GAGGKSSDGK QSVLNKIEN TEDRSQVCYG SKGEVERFER  
 EIAPFSLLVE KAGGKTSBGV NSCLDIKIEA VDQRTPACLG SANEVDLFNK  
 EAAPFGLLVE KAGGKTSBGV GSVLDVKITG IDQRTPLCIG SAEVDRFNT  
 EAAPFGRLVE MAGGKTSBGV QSVLDVKIEA VDQRTALAIG SANEVDRFNE  
 EAAPIALLVE KAGGASSCDG VSALDVQING IDQRTQVCFG SRTEVARFEH  
 EVAPLGLLVE KAGGYSSDGK ISVLDKVVVN TDDRTQVAYG SRNEIRFEE  
 EVLPIGYVIE KAGGKSSNGA GSVLDIKIKS CEDRSQVCYG SADEVARFEE  
 EVAPIGYVME KAGAKSSDGS GSVLDIKVQT TEDRSQVCYG SAGEVARFEQ  
 evaplgllie naggfssdgh ksvldktiin lddrtqvayg skneiirfee  
 evaplgflie kagghssegk ksvldievkn lddrtqvayg slneiirfek

evaplgflie kaggyssdgk qsvldkvinn ldertqvayg skneiirfee  
evaplgflie kaggssdgk qsvldkvisv ldertqvayg skneiirfee  
evaplallie naggasscdg craldvevta heqrtqicyg skgevarfek  
evapigyvie kaggkssdge qsvlnievg tedrtqvayg saaevdrfeq  
eaapmaflih caggrsttgl tnmmnvrsvs meqttpialg cardveryer  
eaapmaflve caggrsttgt knmmdvrve meqktpialg clwdveryes  
elfplalvve ccggravdpv nilgdkgveg cderggivcg taeveyake  
ellpvalvie caggqaidpa srfditlkg cddraglvcg tseevevkk  
----- ---ggvicgn nievdlaipe lrlksplq-- -----  
EVAPLGFLME KARRYSSDGQ QSVLDRVIN- -----  
evaplgllie naggysdgk qsvldkvvn tddrtqvayg srdeiirfee  
EVAPLALLIE KAGGASSCDG VSALDIPILV CDQRTQICYG SIGE-----  
evaplallve kaggasscdg vsaldipiln cdqrtqicyg sigevrrfee  
EVAPVAFLIE RAGGASSDGE RSALDIPIPG TDVRSQVCYG SKGEVARFNE  
EALPLAFLVE AVGGRSSDGS TSLLDKRITL LIERTPVVLG SPSEVQRYIE  
EAAPFGLLVE KAGGKTSBGV ASILDTKITG IDQRTPLCIG SASEVDRFNL  
eaapfgllve kaggktsdgv gsildvqins vdqrtalclg ssdevnrfne  
evlaialvve aaggrtsngq ksllldvaieh mdhralccg sadeikrmee  
EVLPIALLVE AAGGRTSNGK TSLLDVGIEH MDHRSALCCG SADEIQRMEE  
-----  
ecaplsflie kaegksfngk hsvldteitg yqqkseiiyg sadeieffks
