# Supplementary material for: Phylogenomic Analysis of “Red” Genes from Two Divergent Species of the “Green” Secondary Phototrophs, the Chlorarachniophytes, Suggests Multiple Horizontal Gene Transfers from the Red Lineage before the Divergence of Extant Chlorarachniophytes
Source: PubMed Central journal article supplement (PMC4074131; doi:10.1371/journal.pone.0101158), 2014-06-27
Supplement: pone.0101158.s005.pdf [file pone.0101158.s005.pdf]

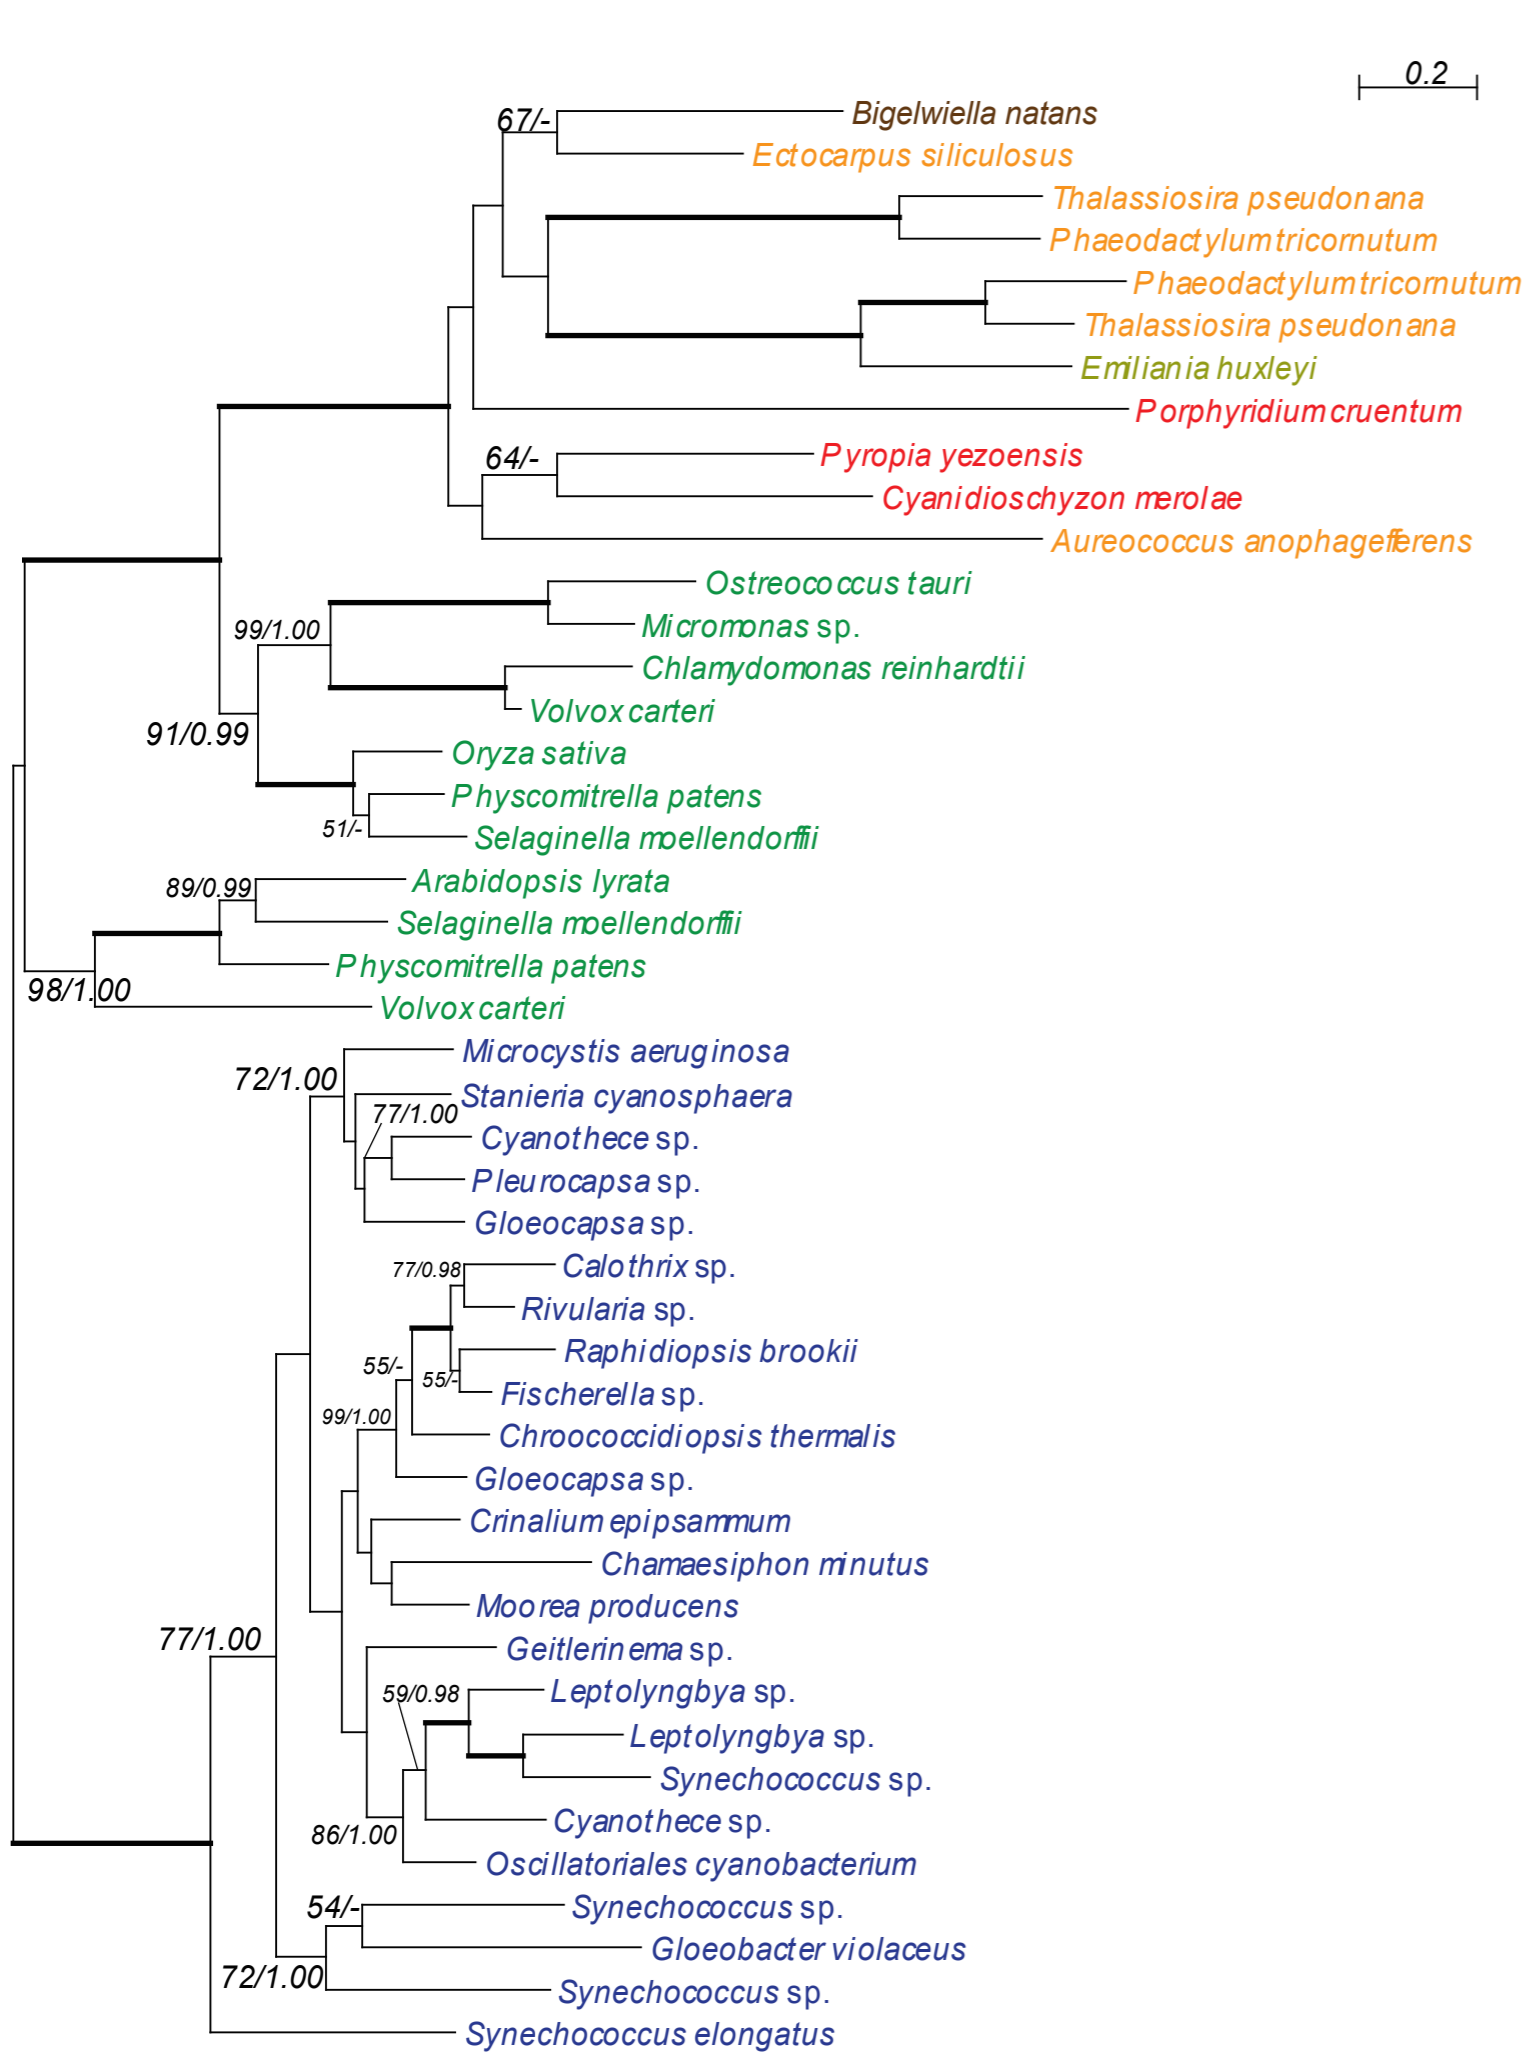

Figure S2 (A) ABC

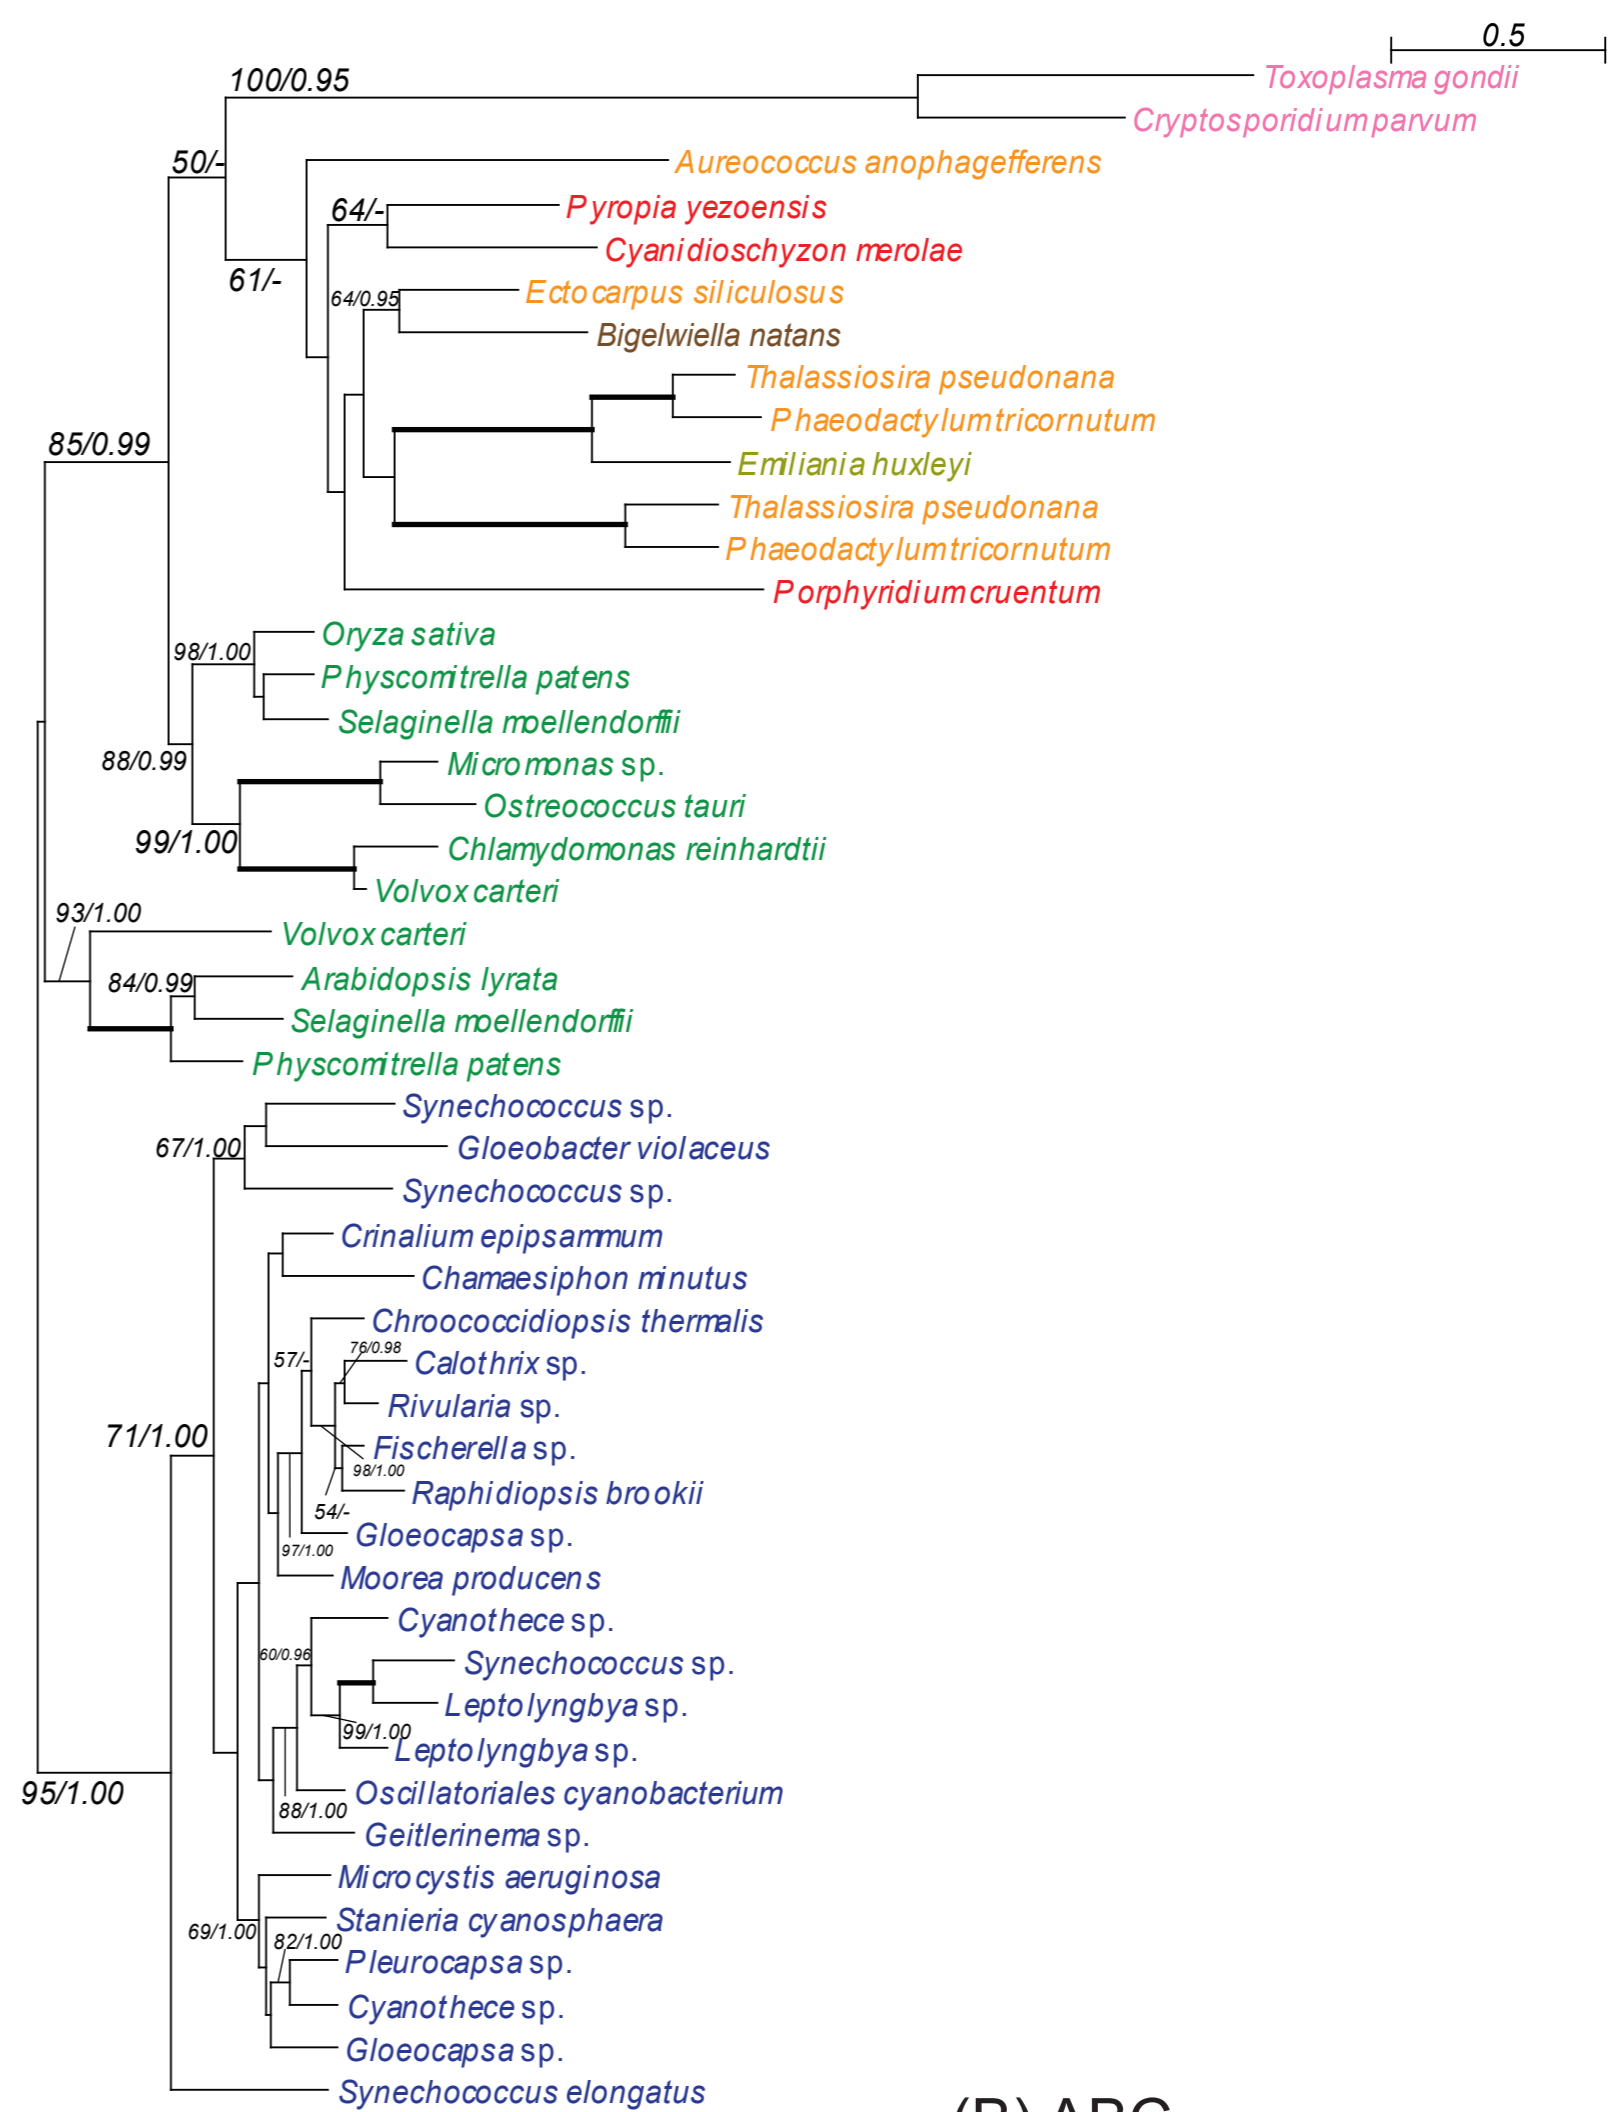

(B) ABC

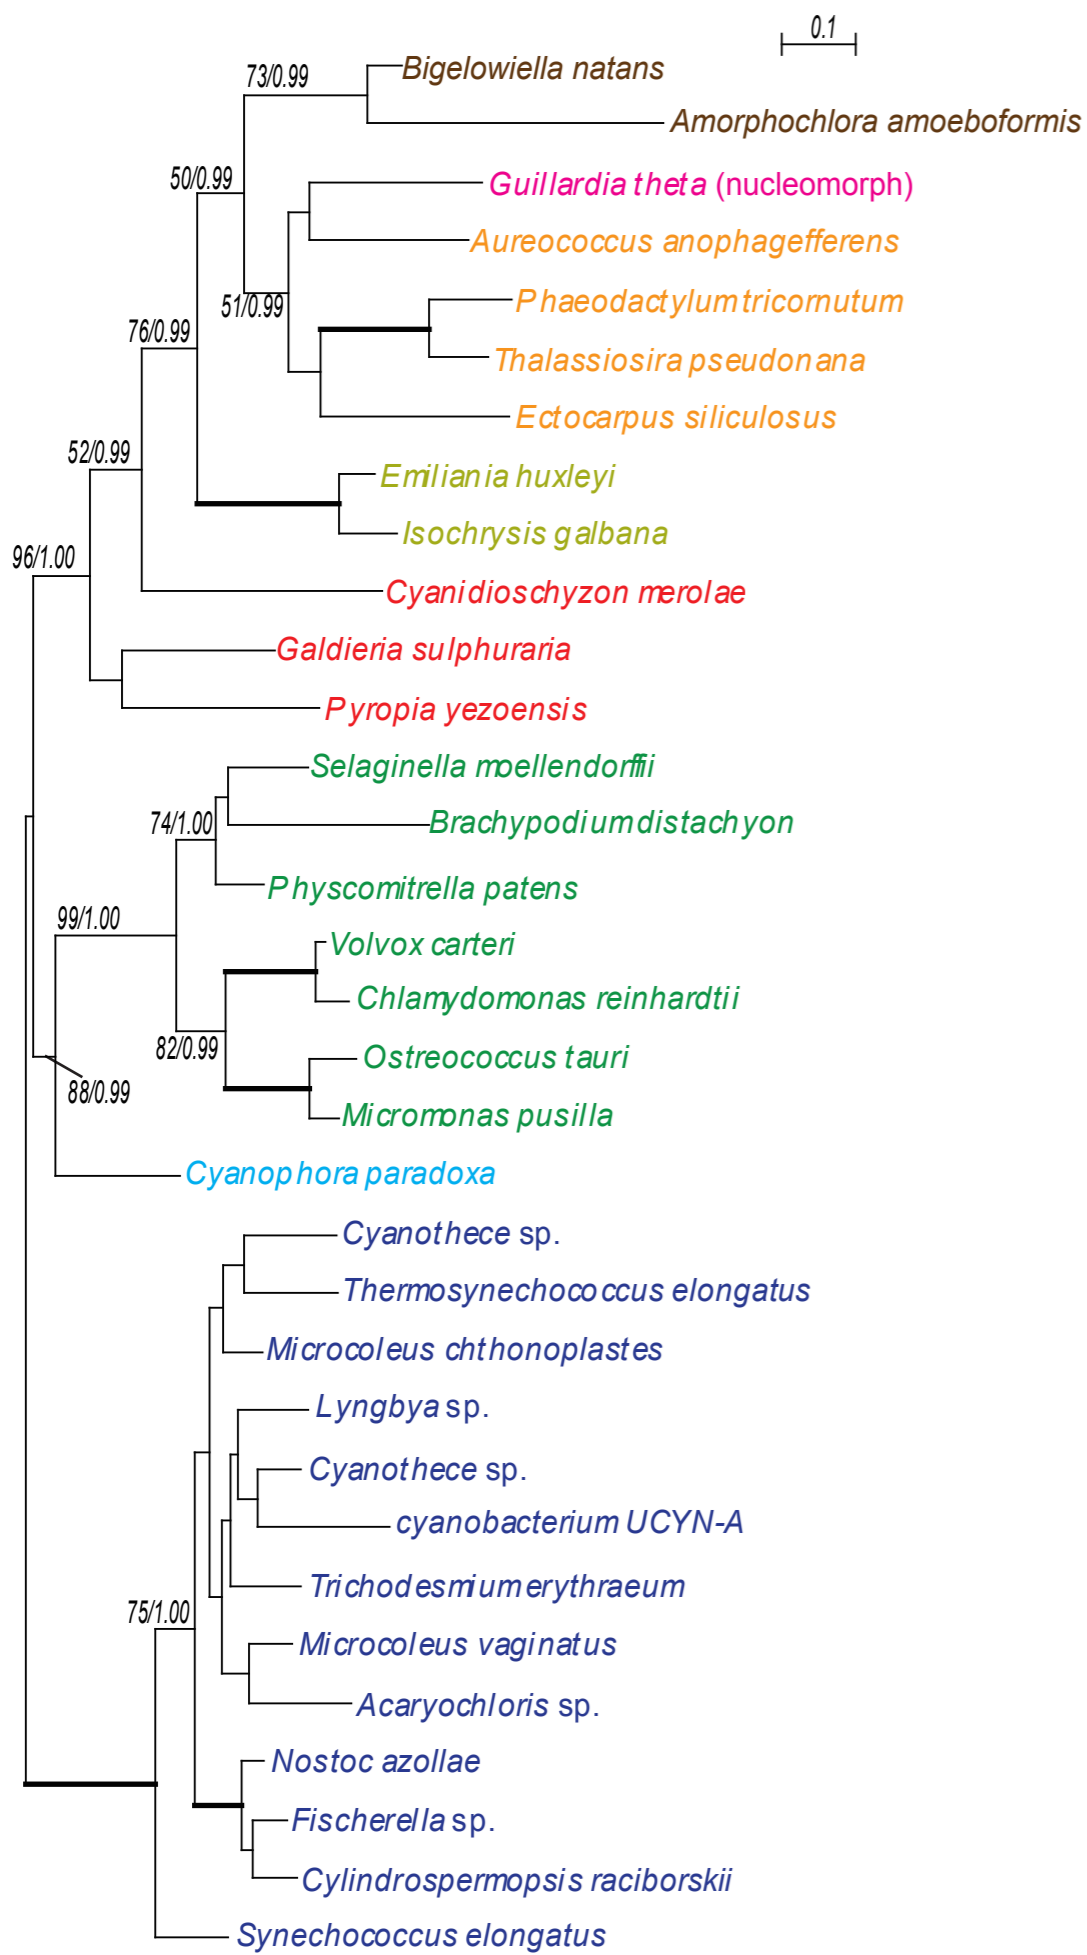

Figure S3 (A) GGR

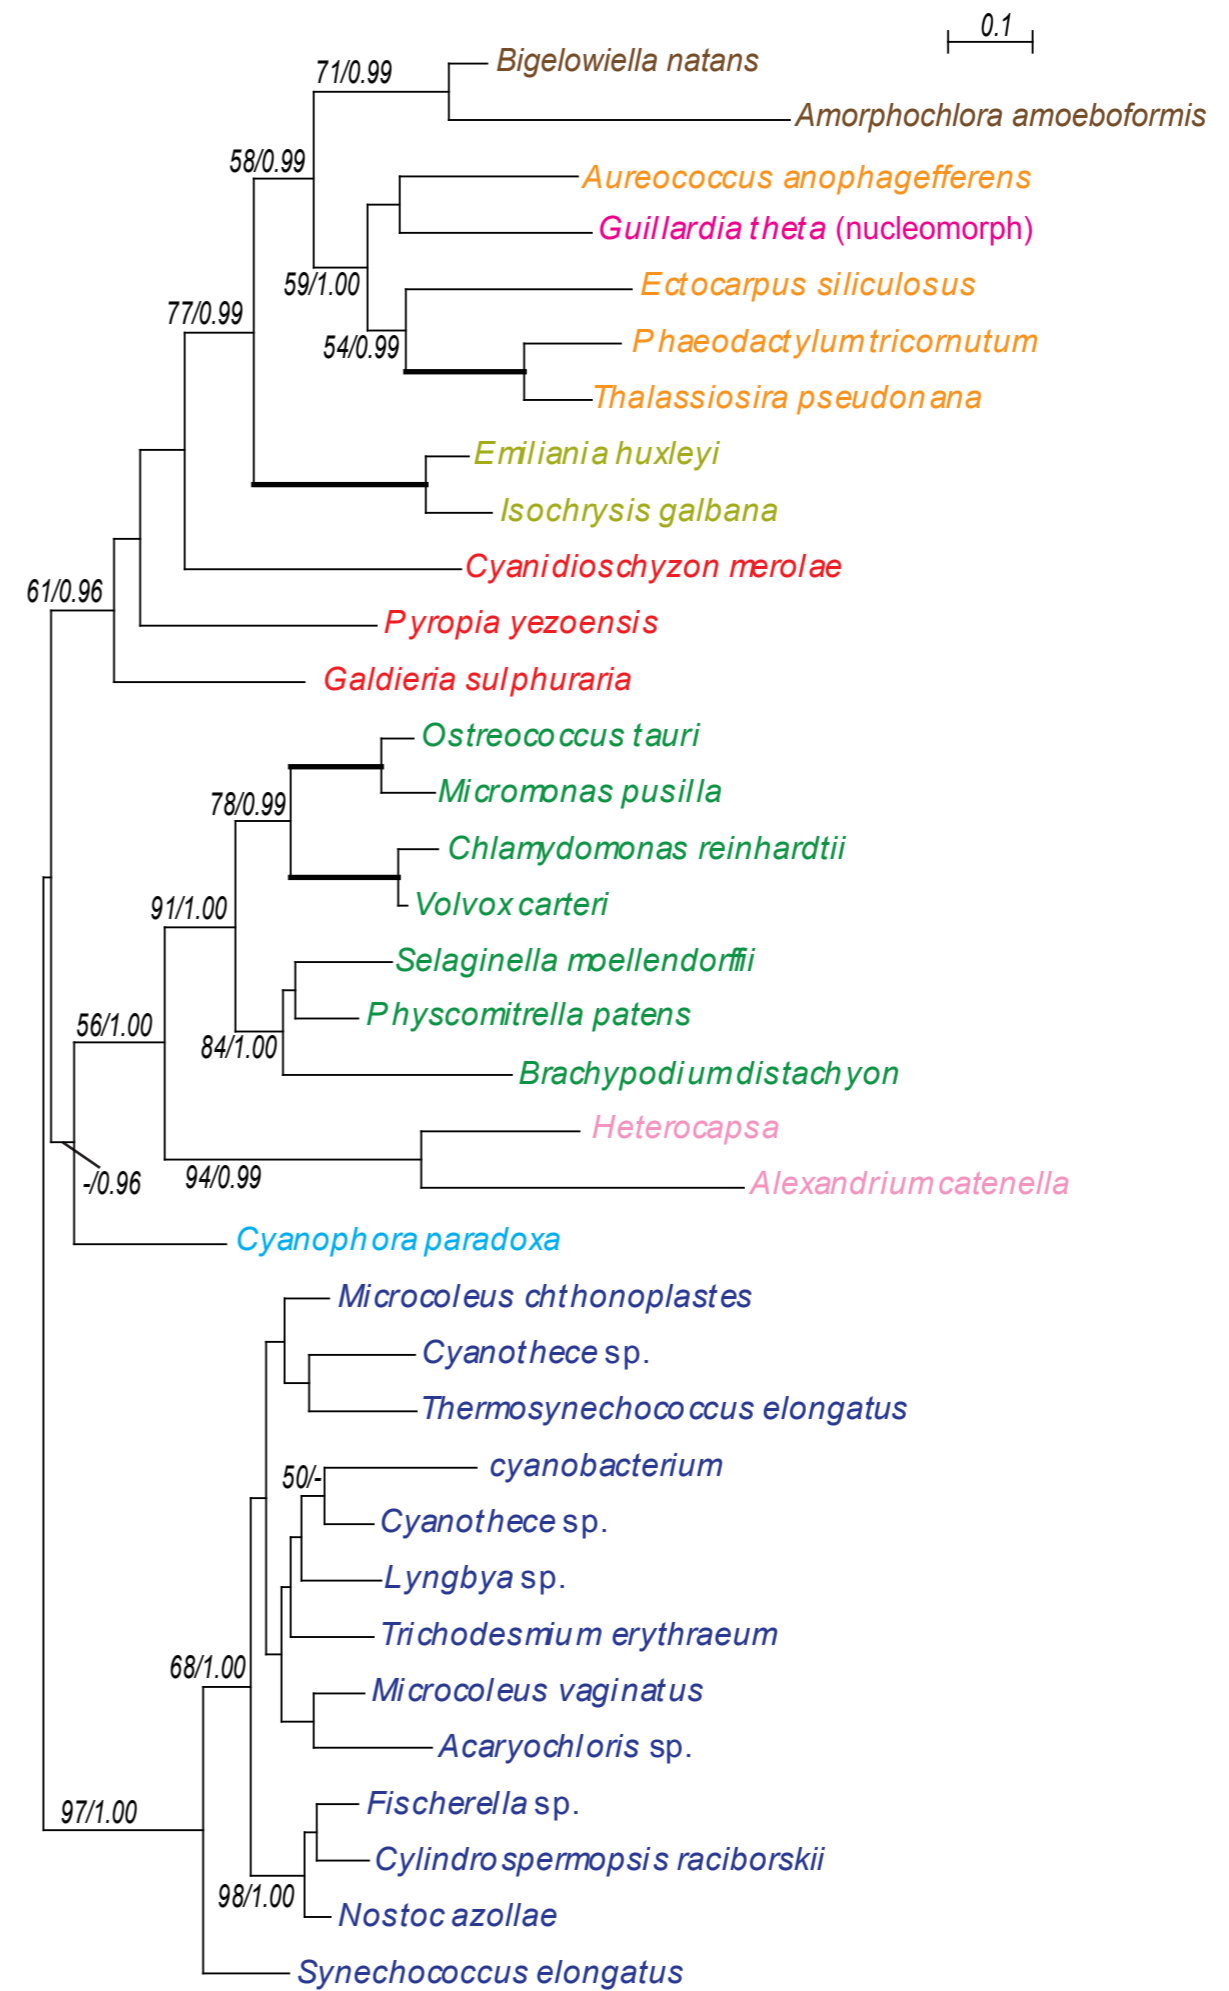

(B) GGR

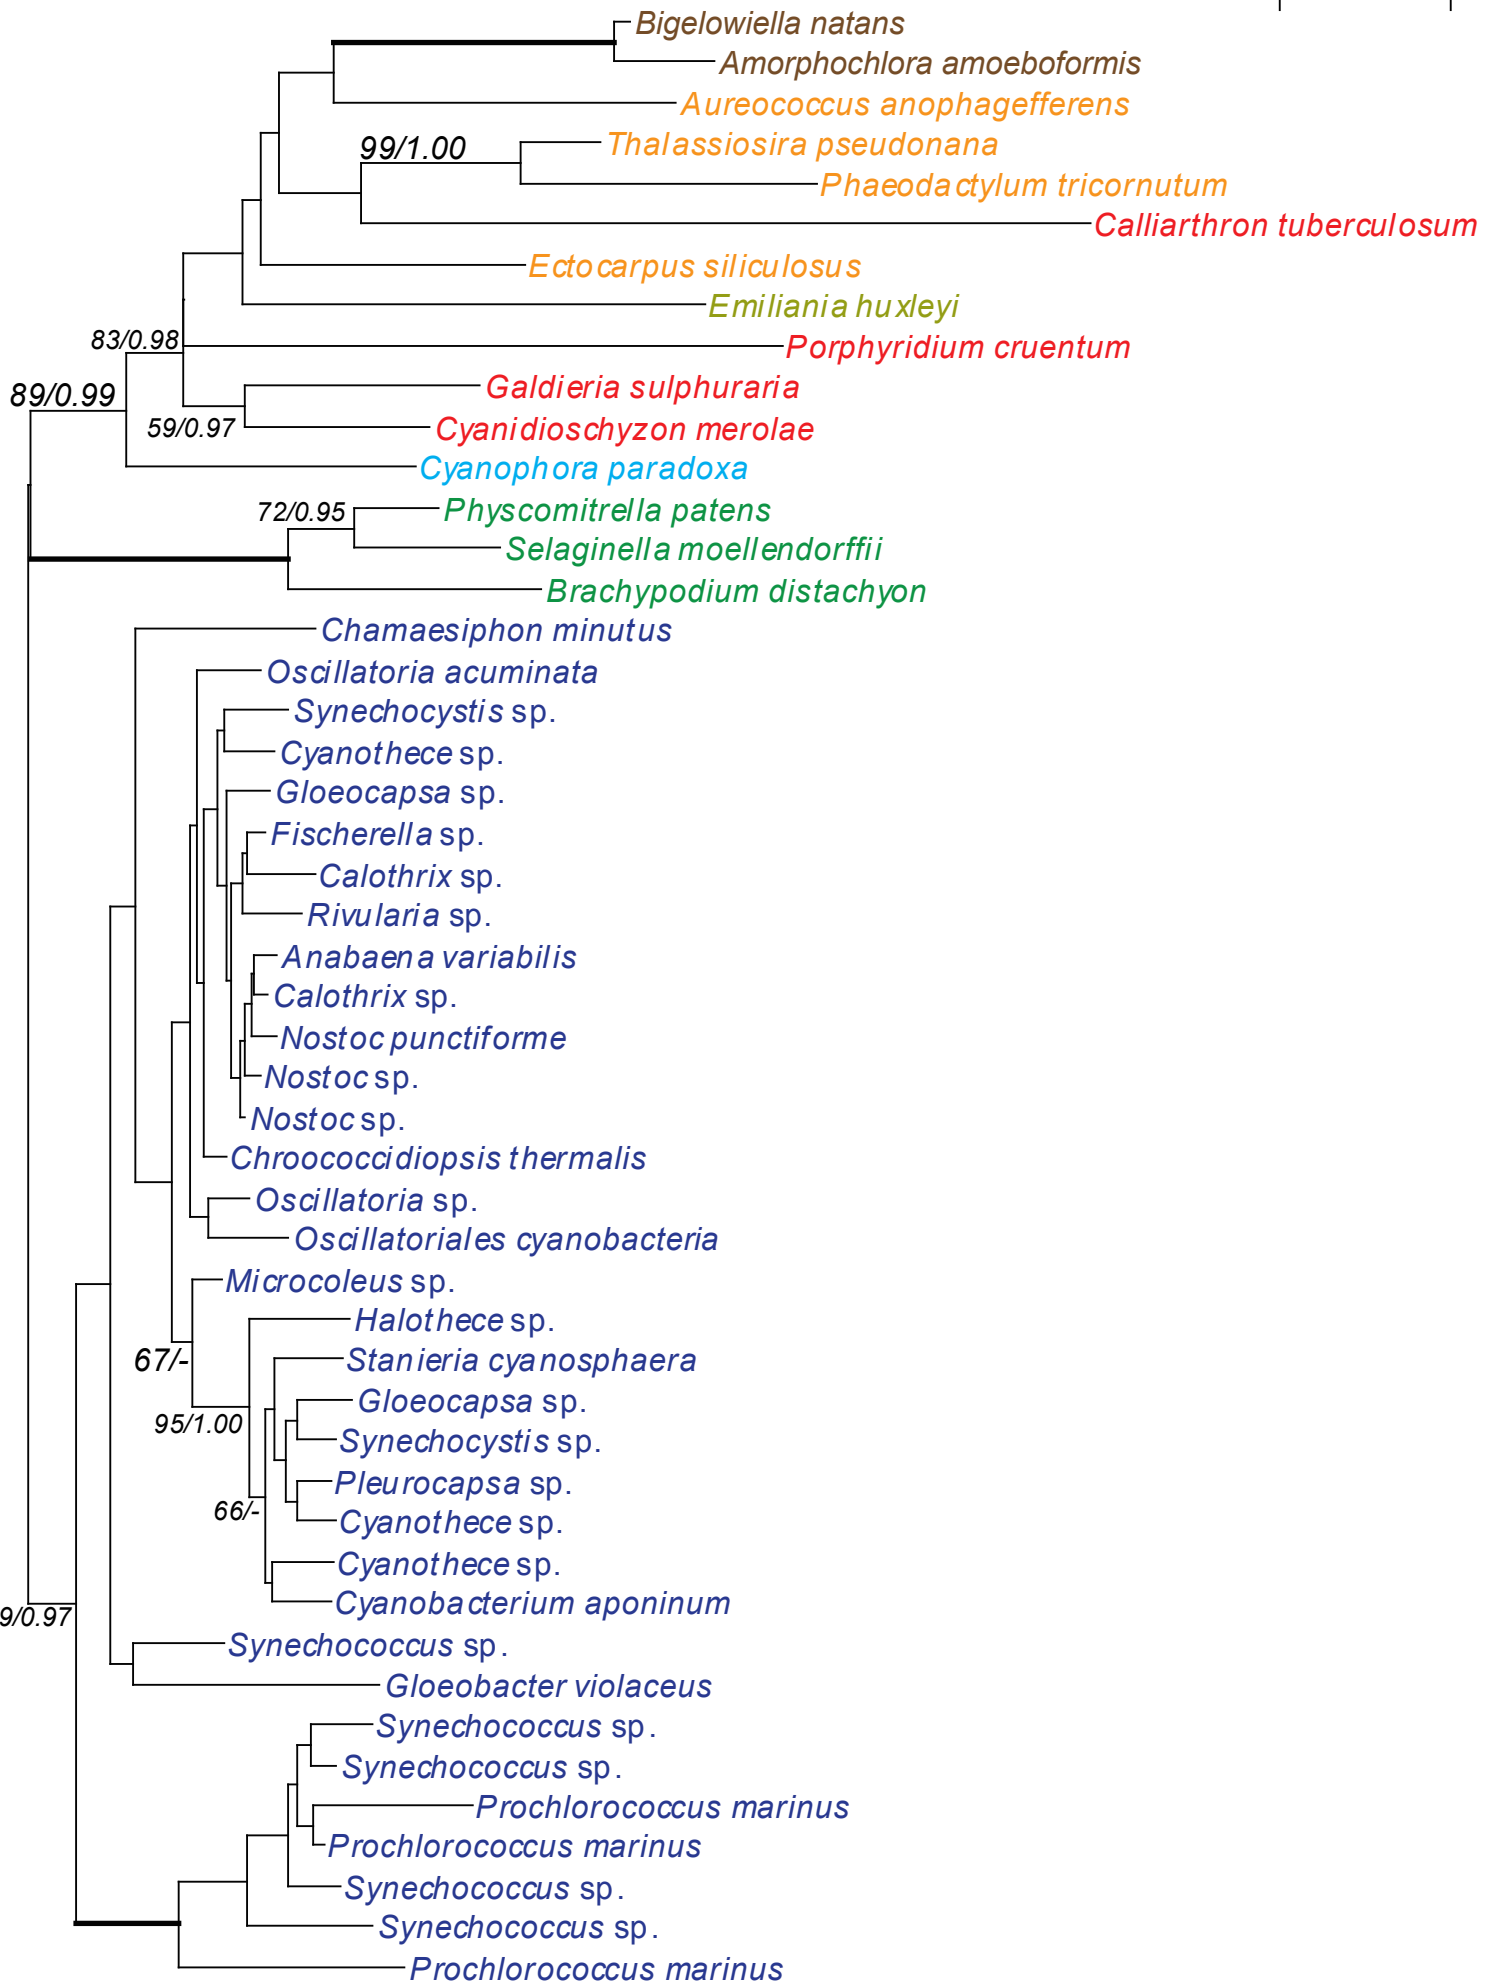

Figure S4 RPS22

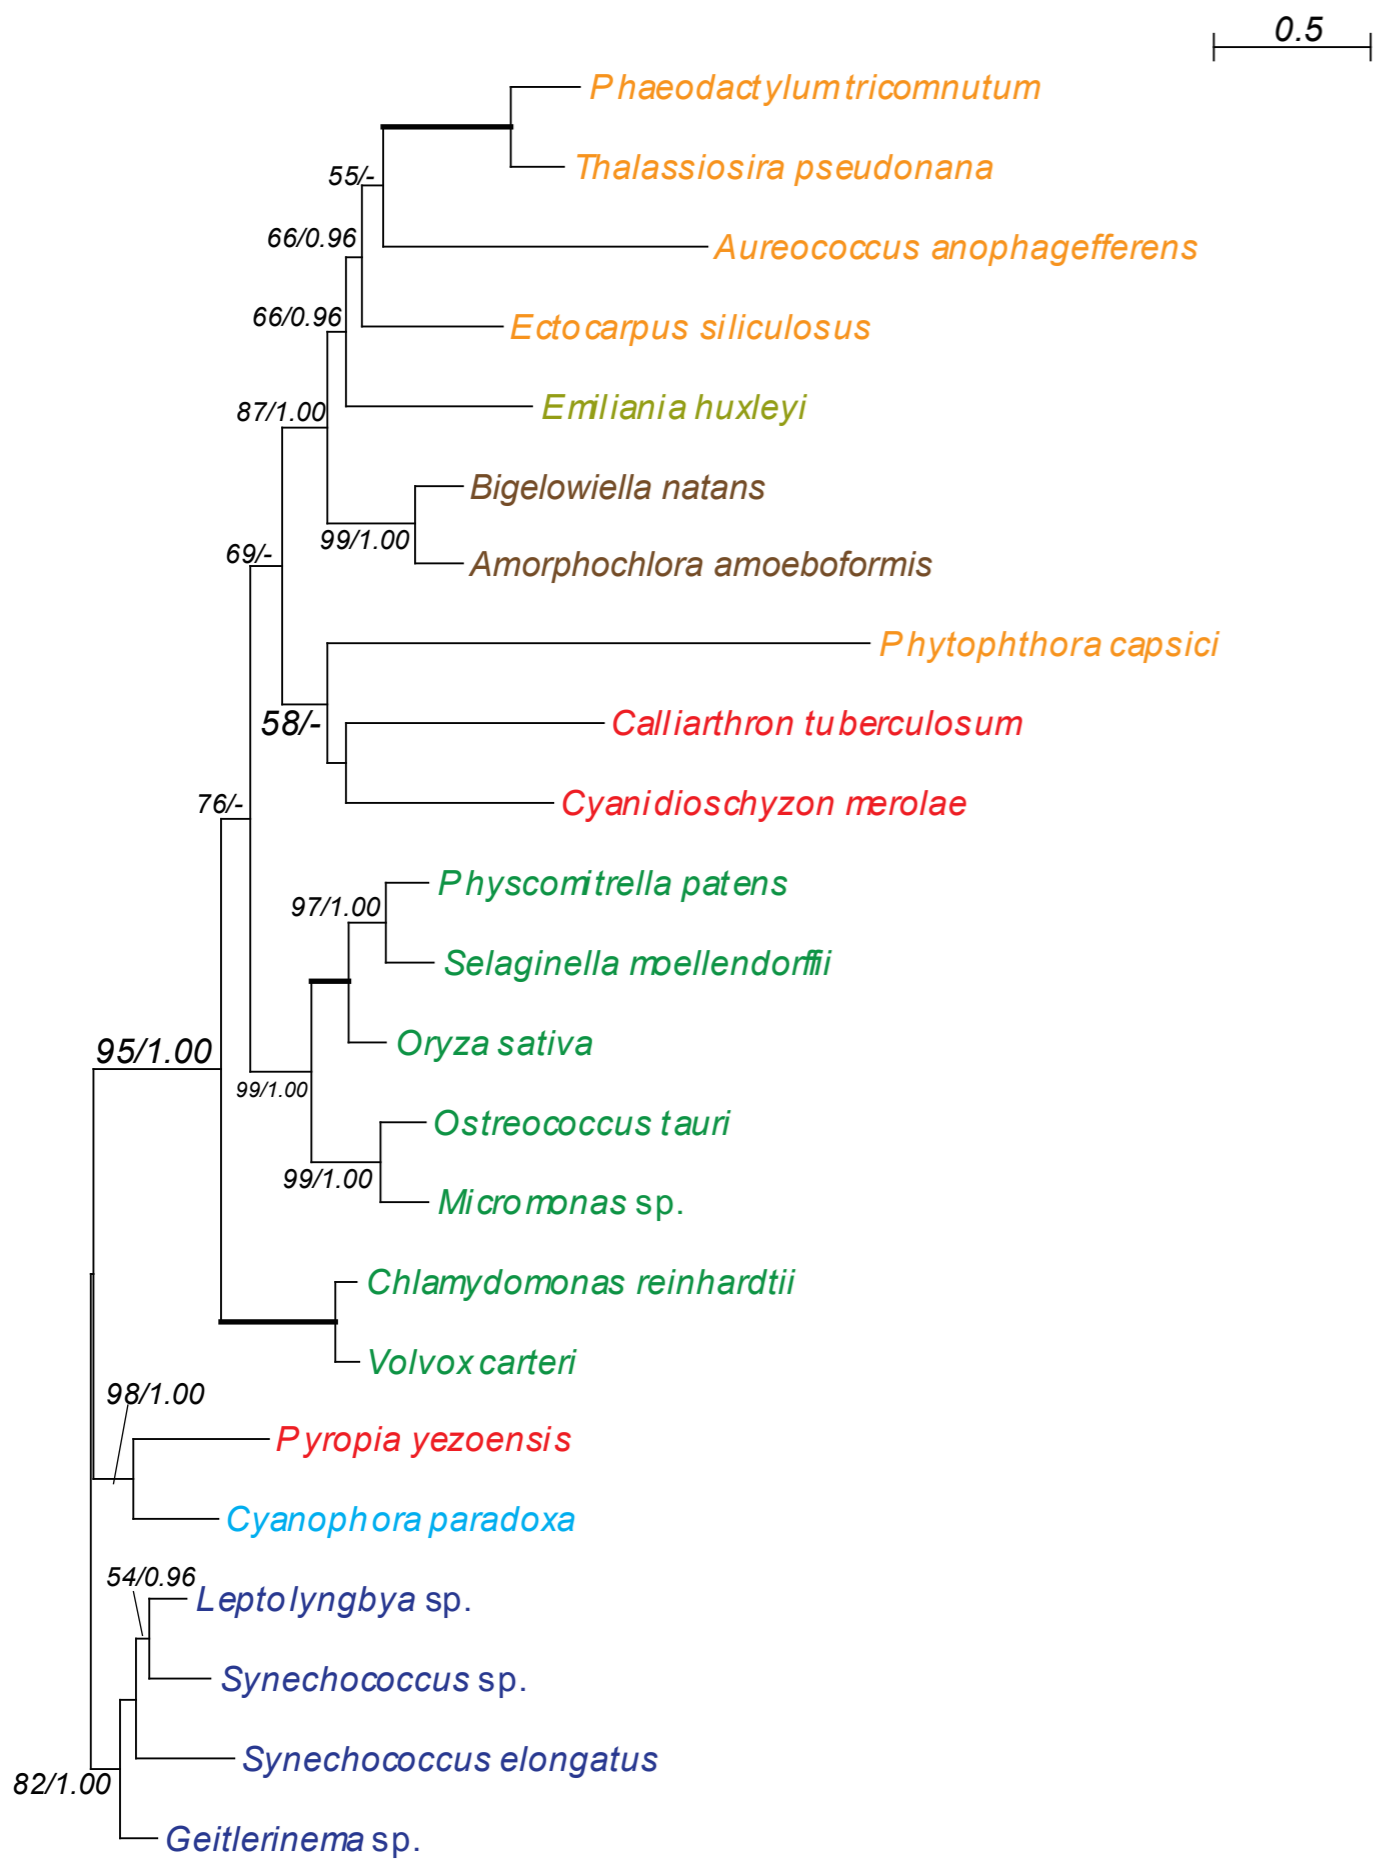

Figure S5 (A) RNABP

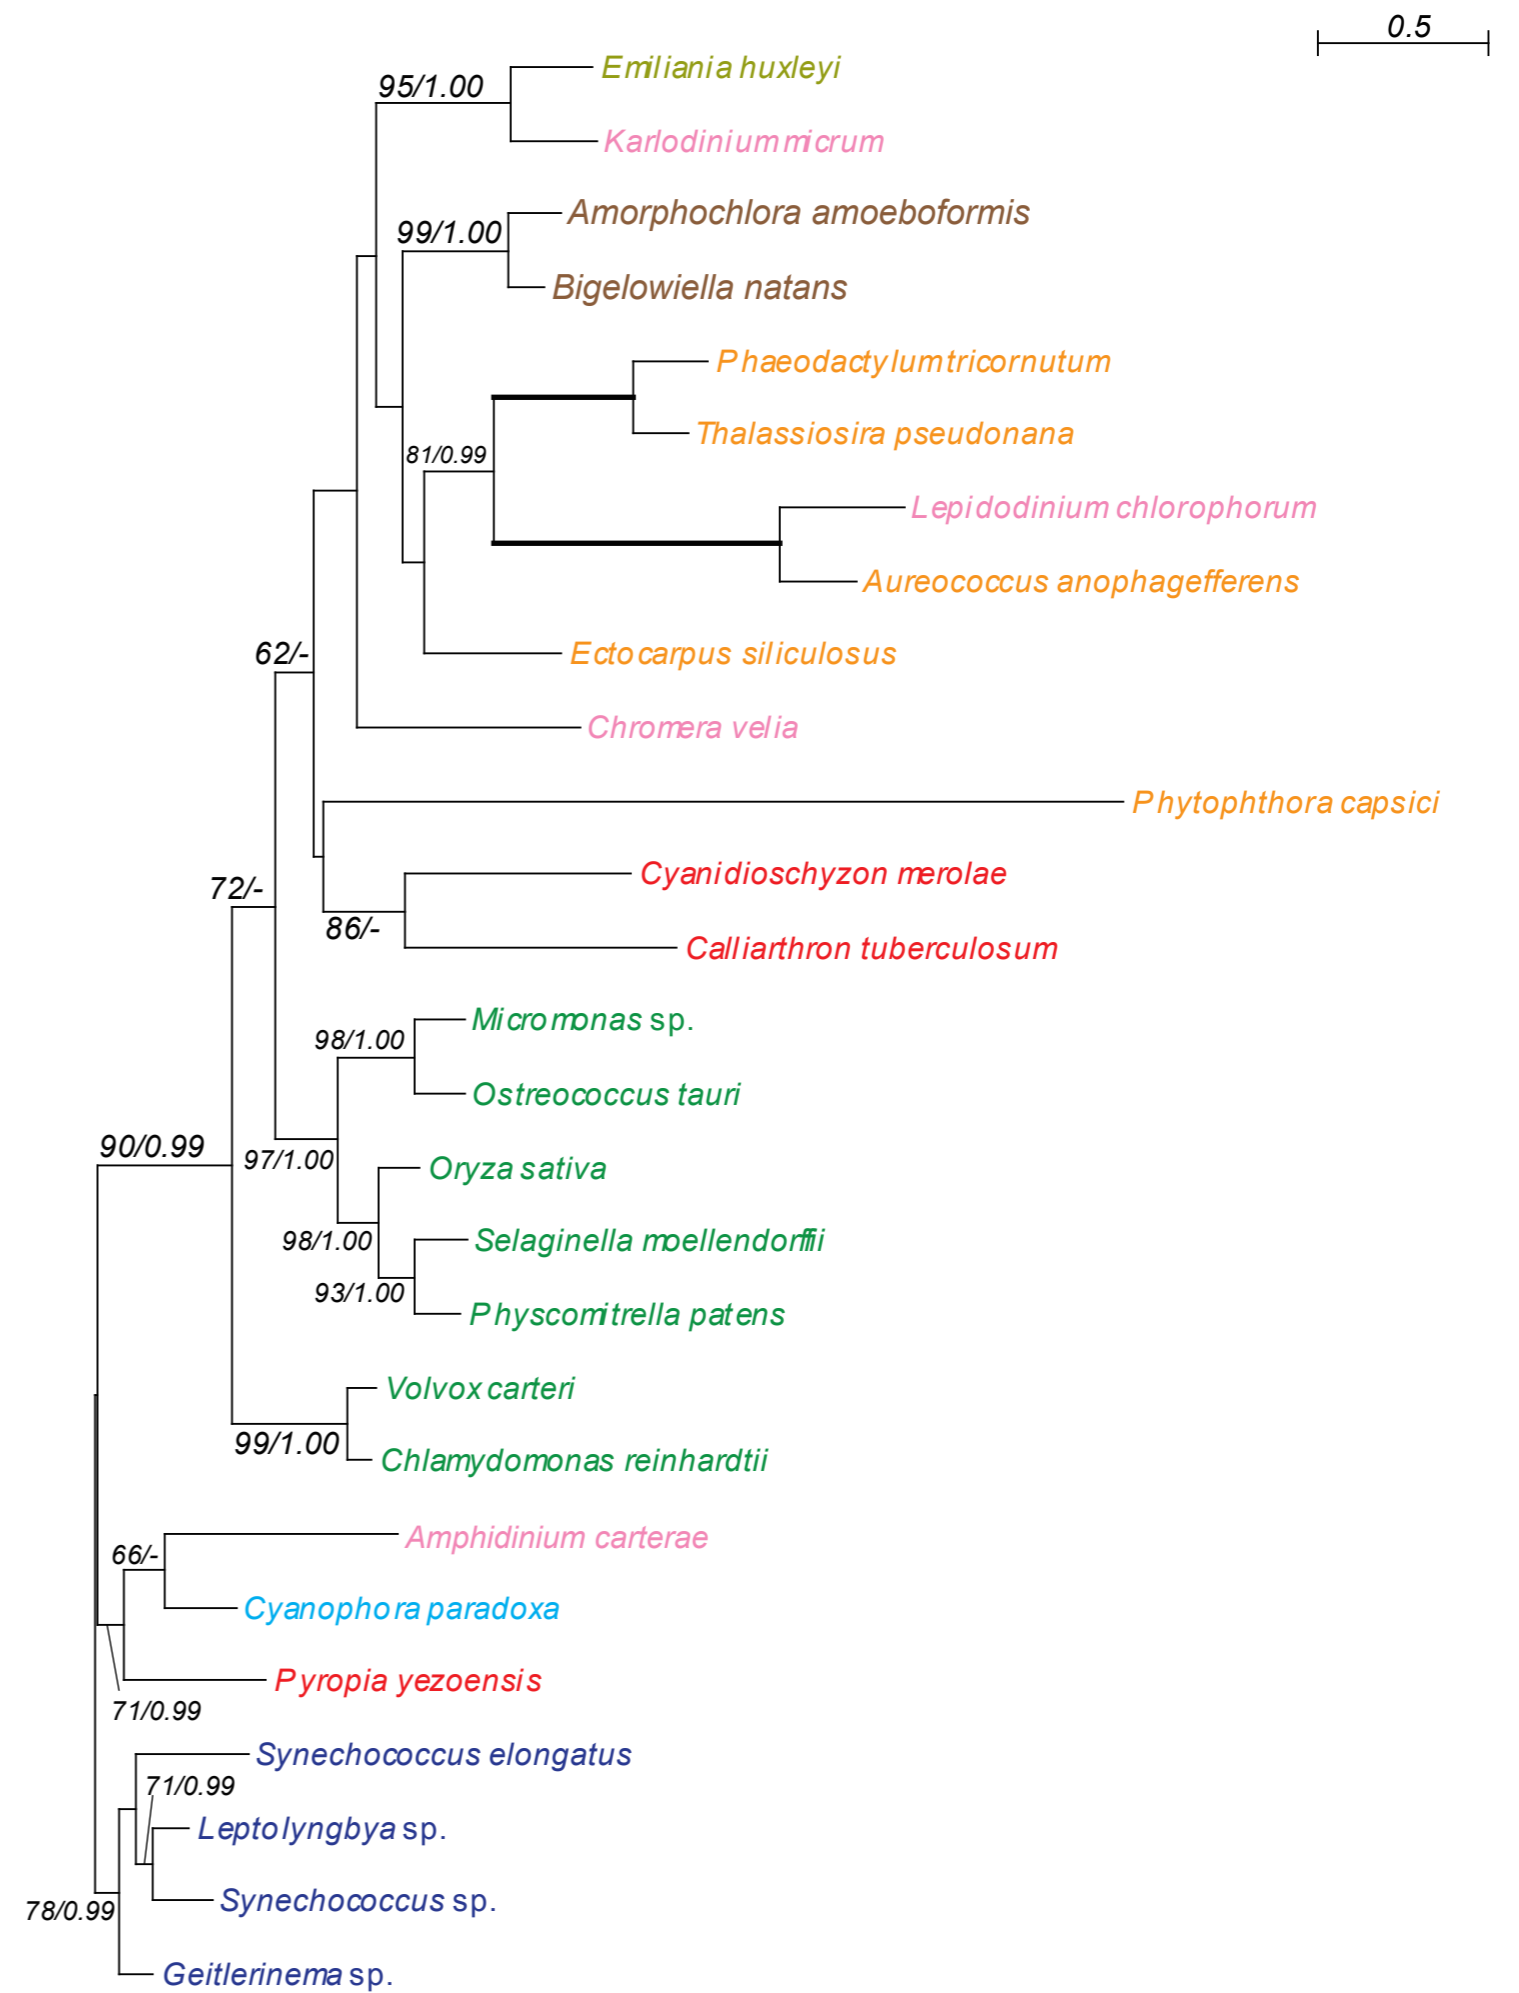

(B) RNABP

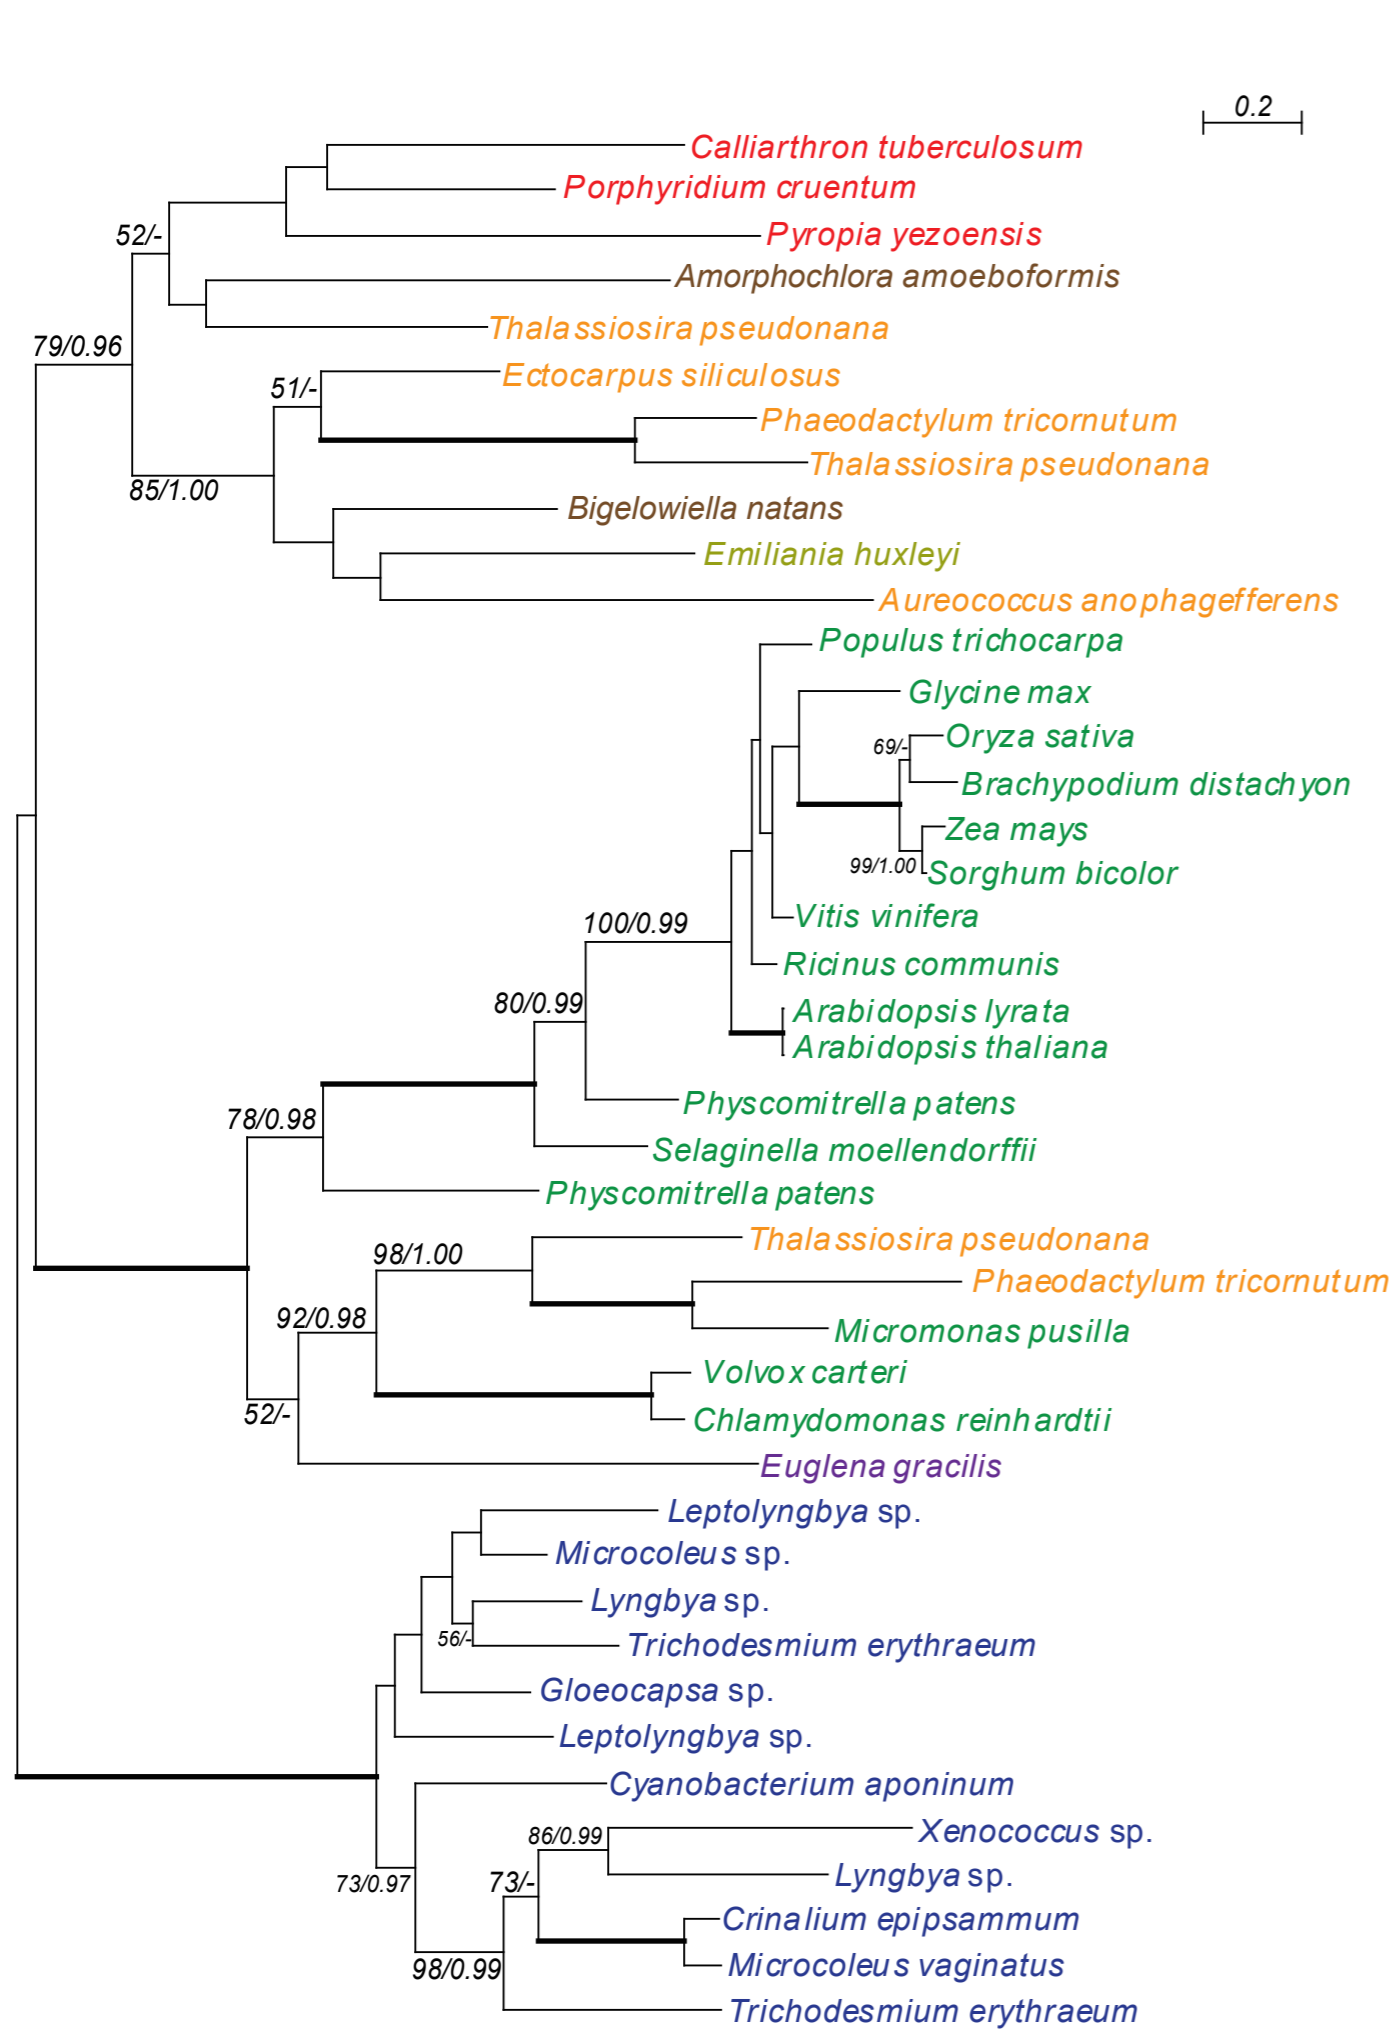

Figure S6 (A) PMP

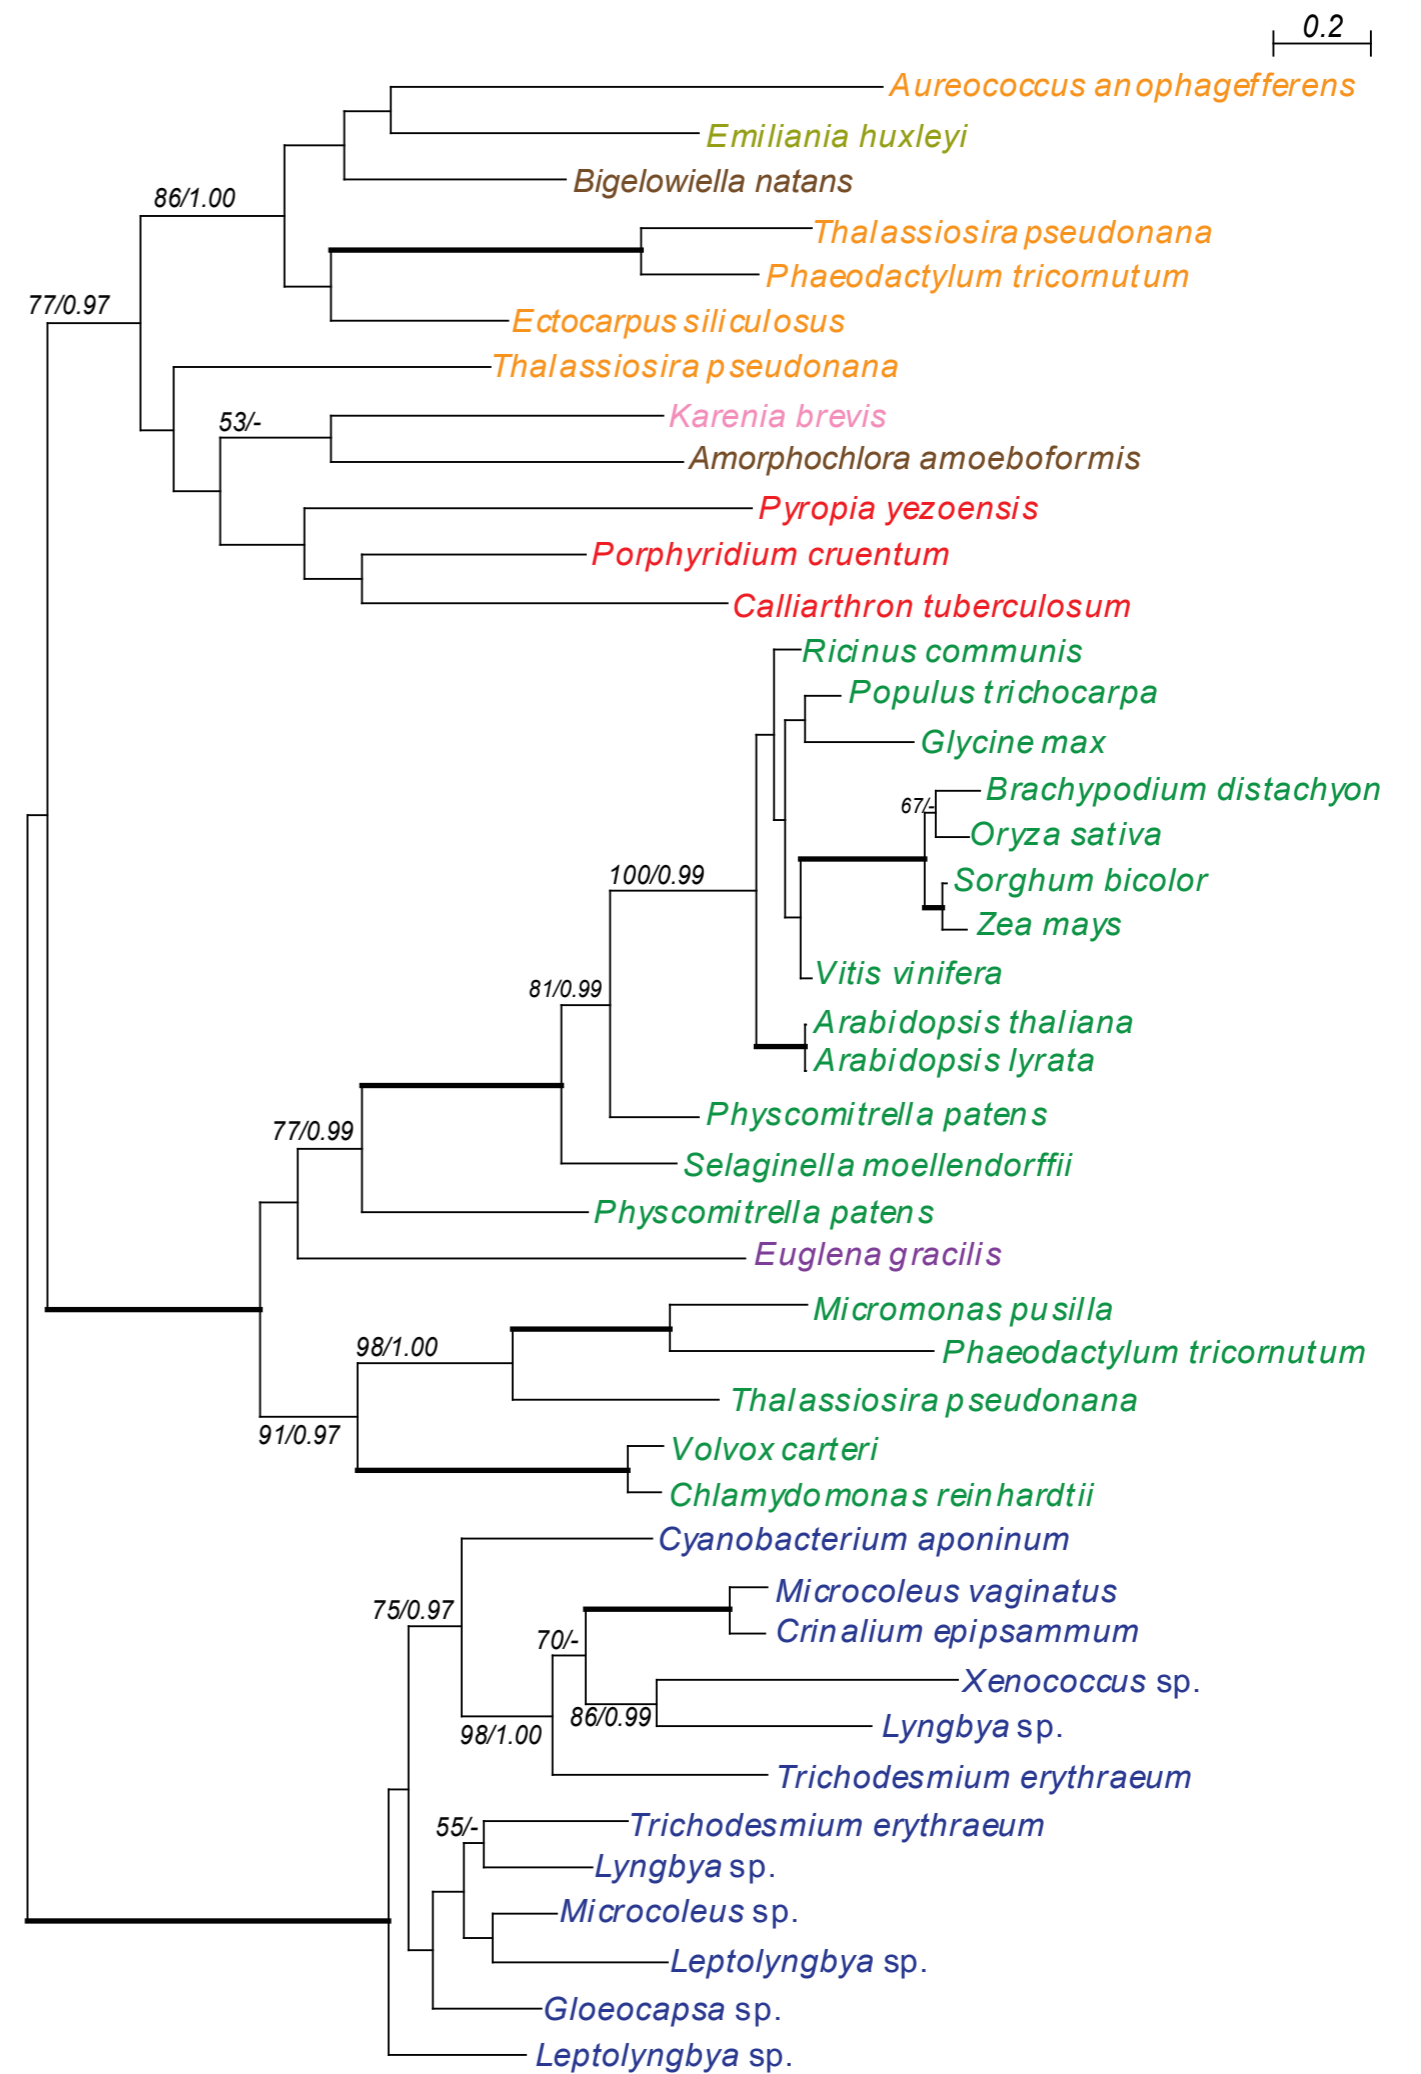

(B) PMP

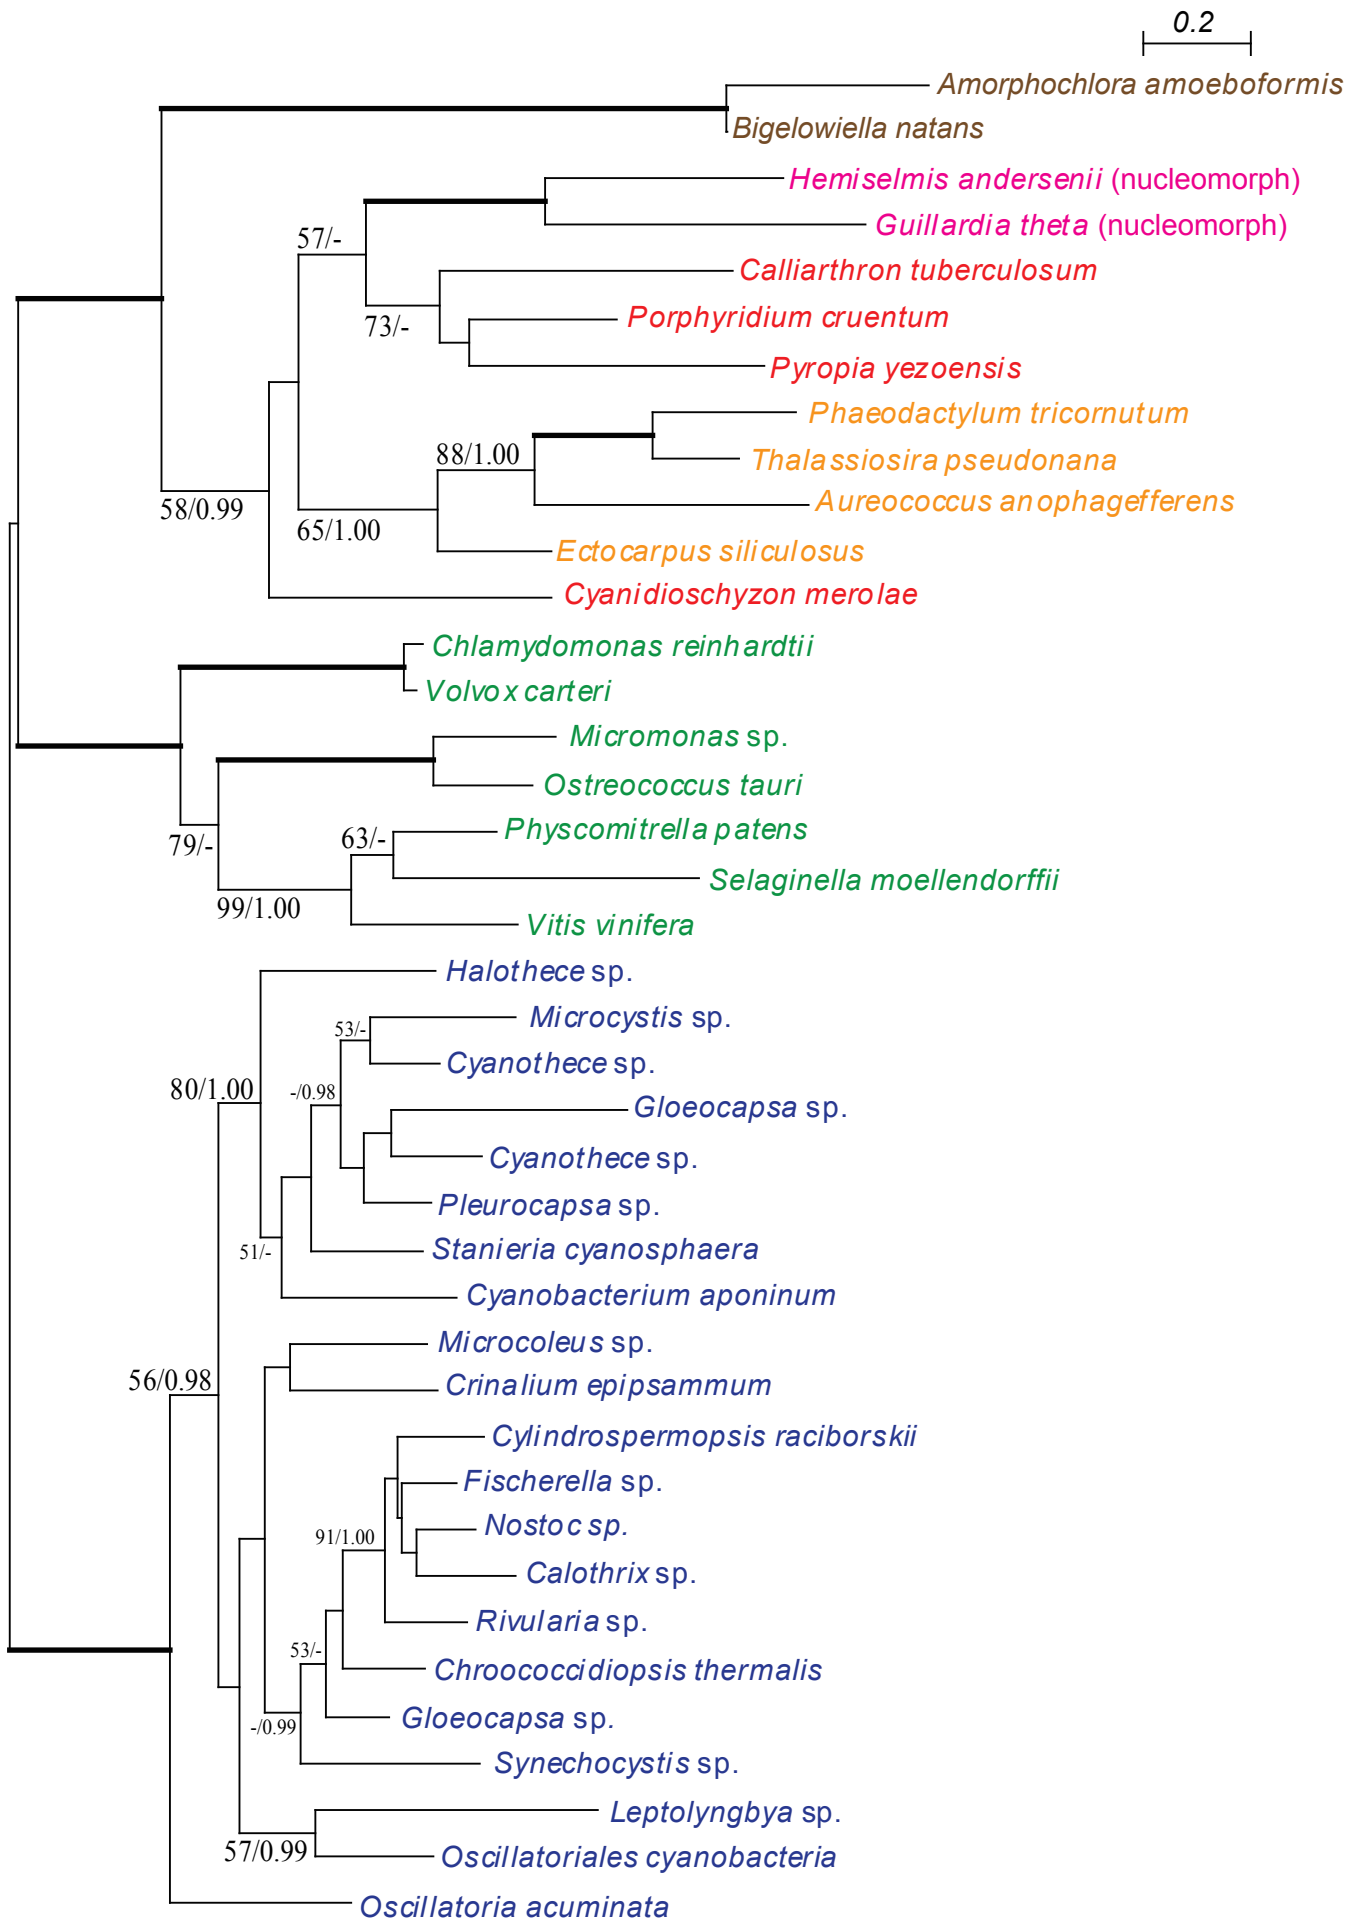

Figure S7 HP

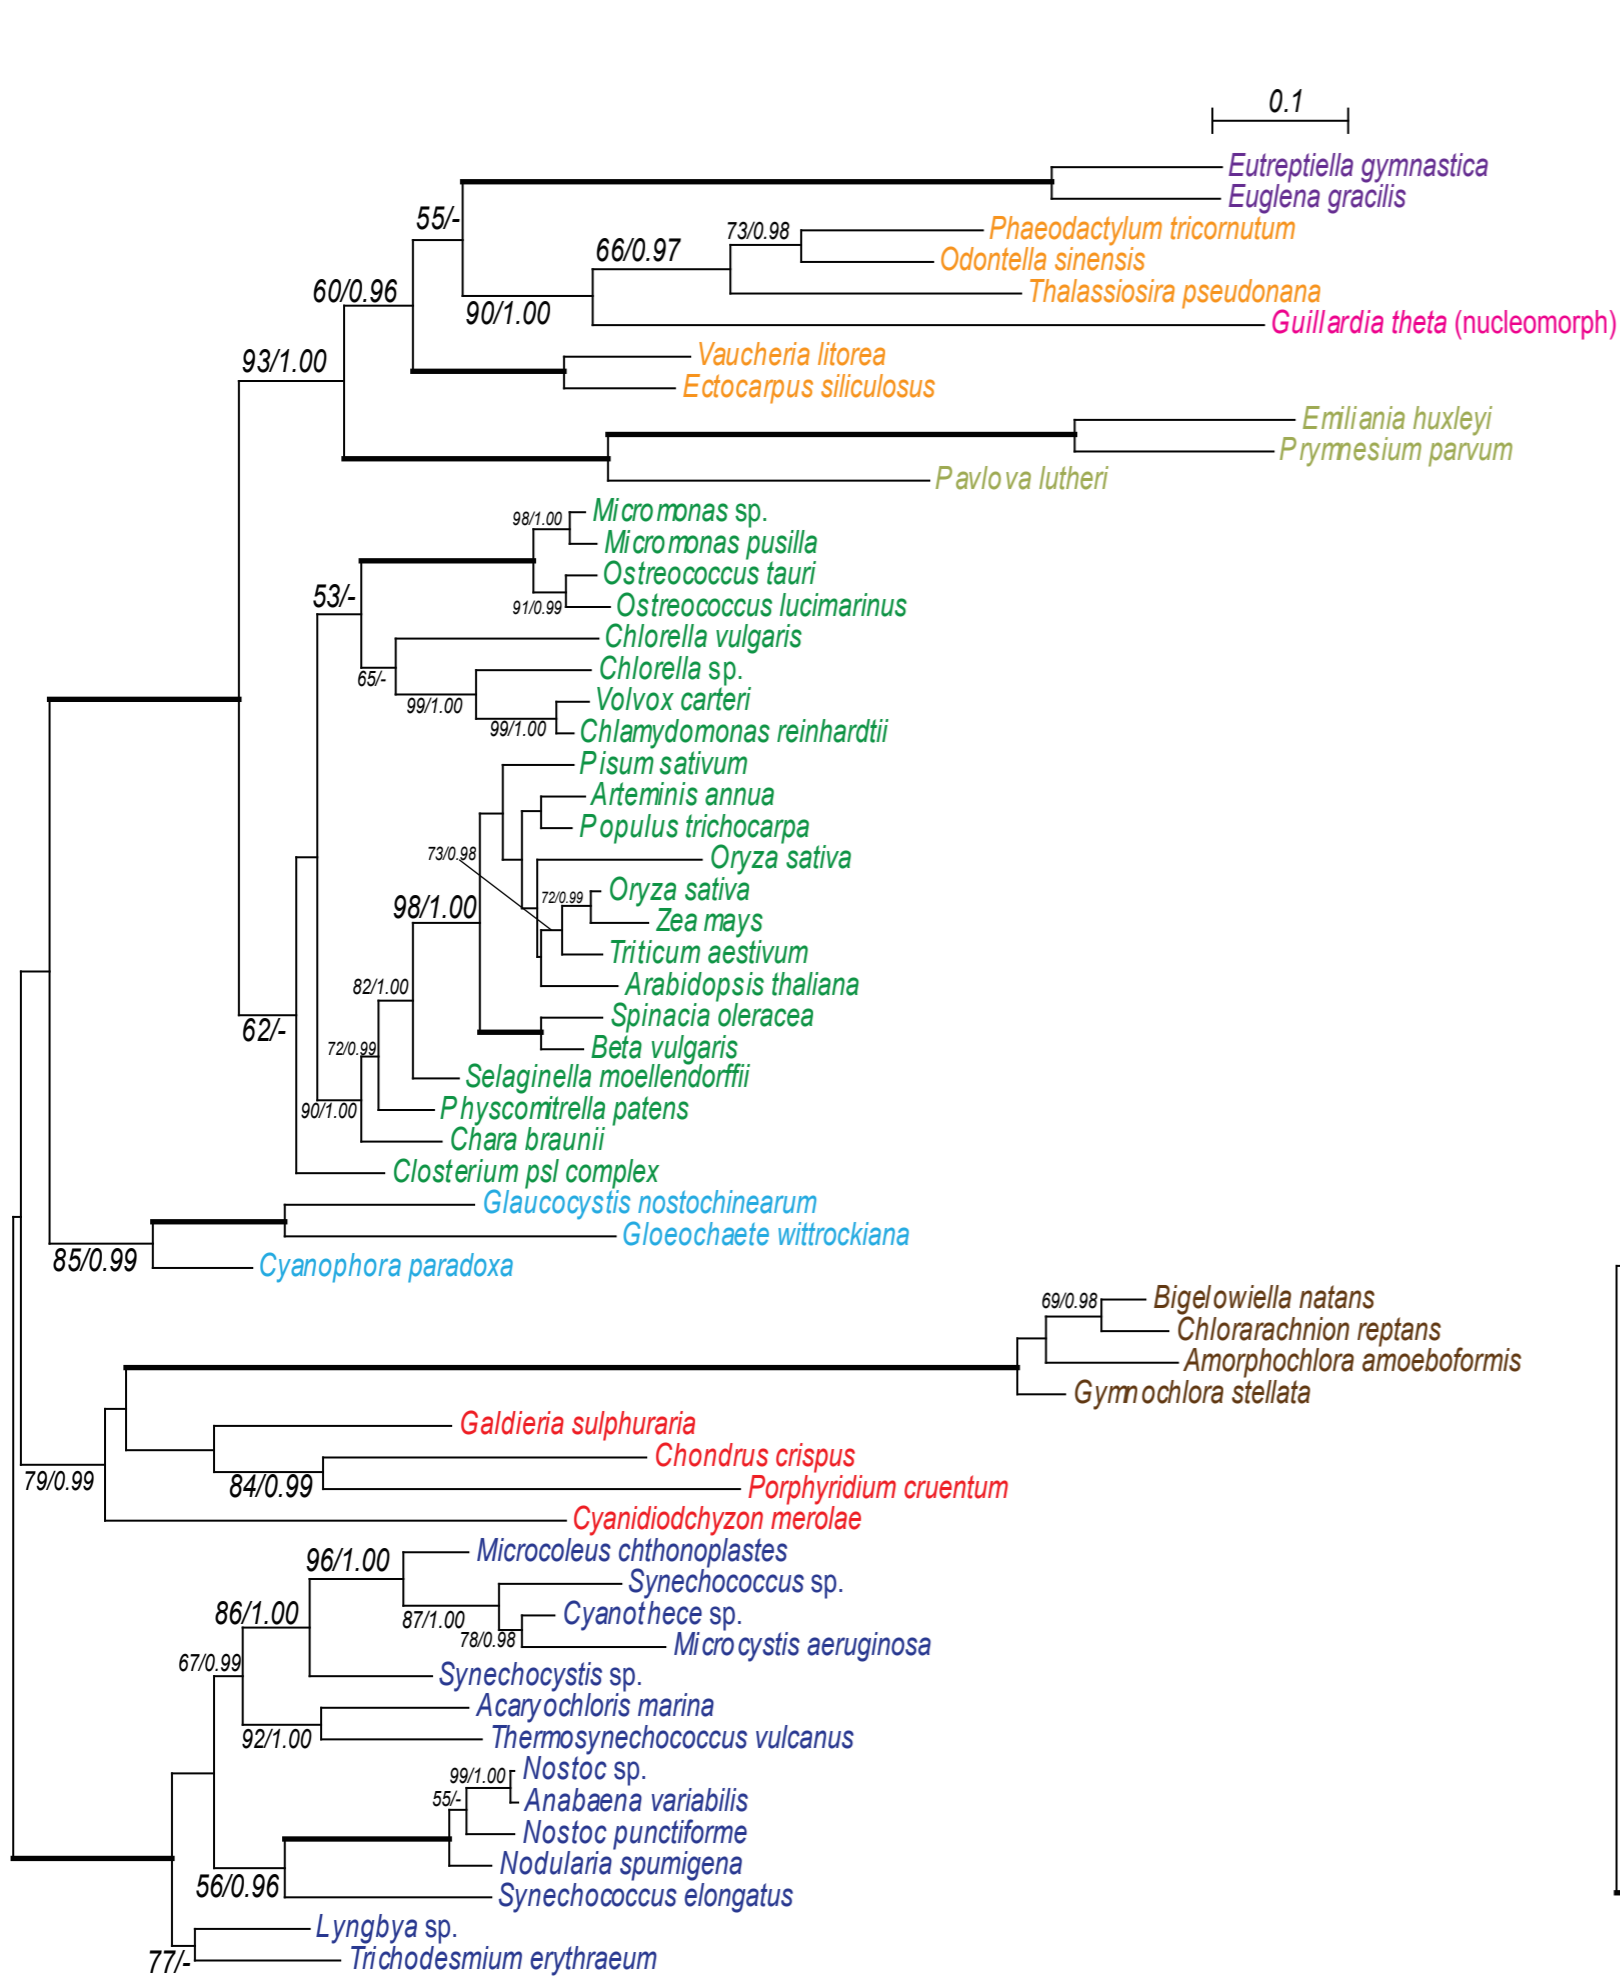

Figure S8 (A)PRK

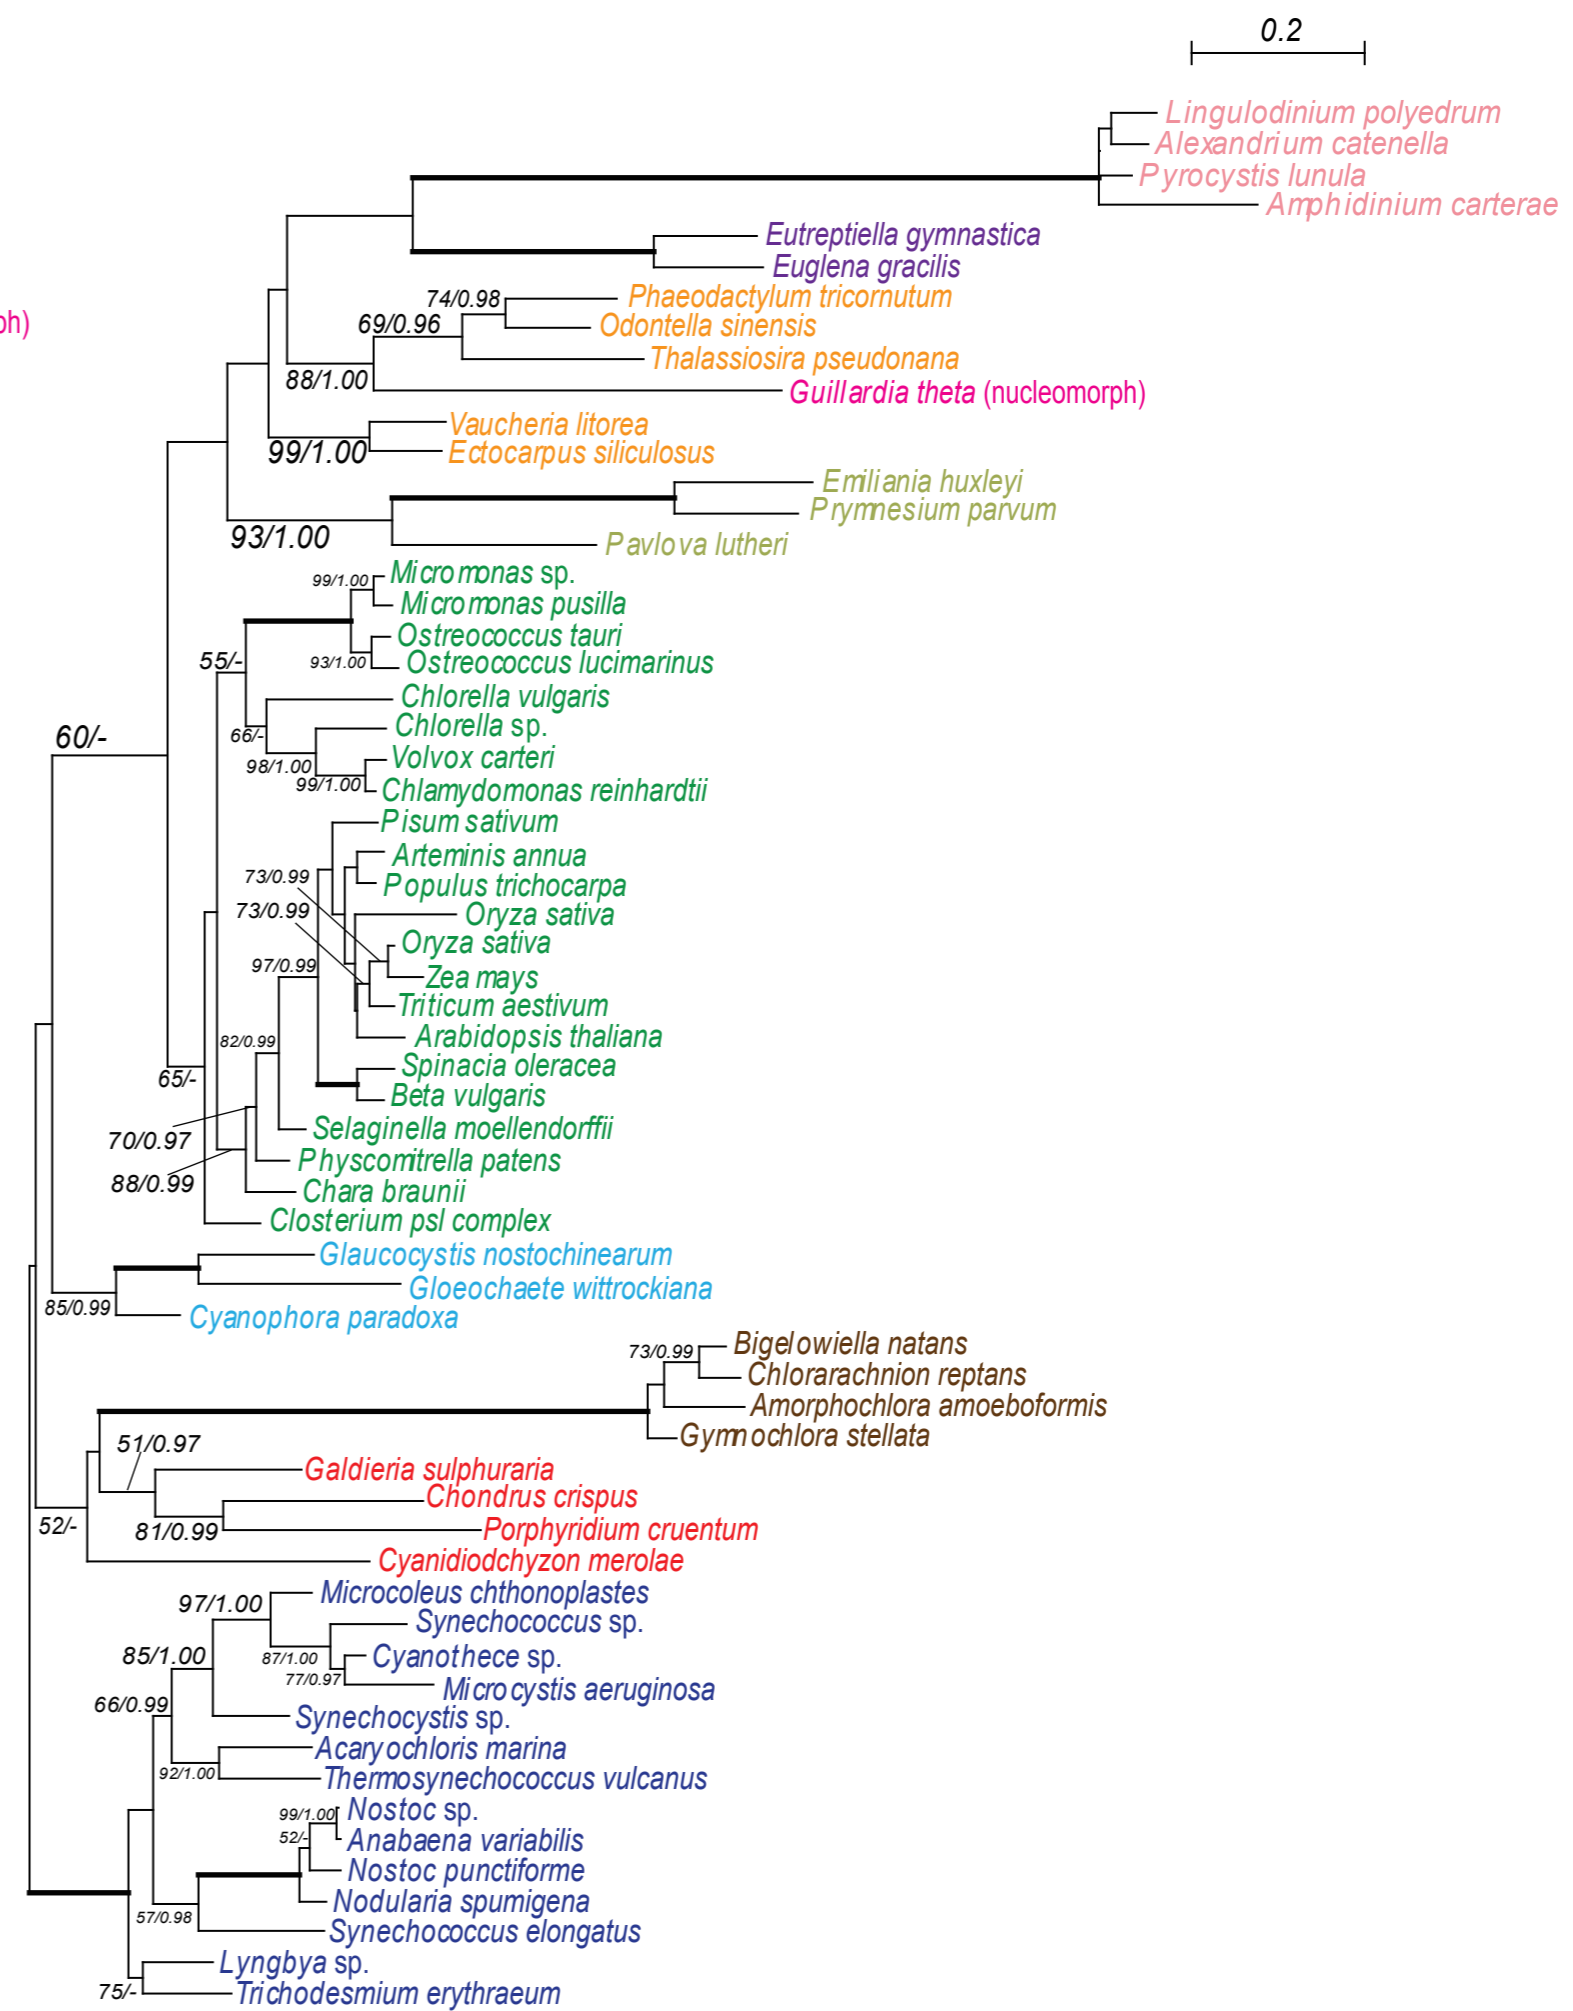

(B)PRK

0.2

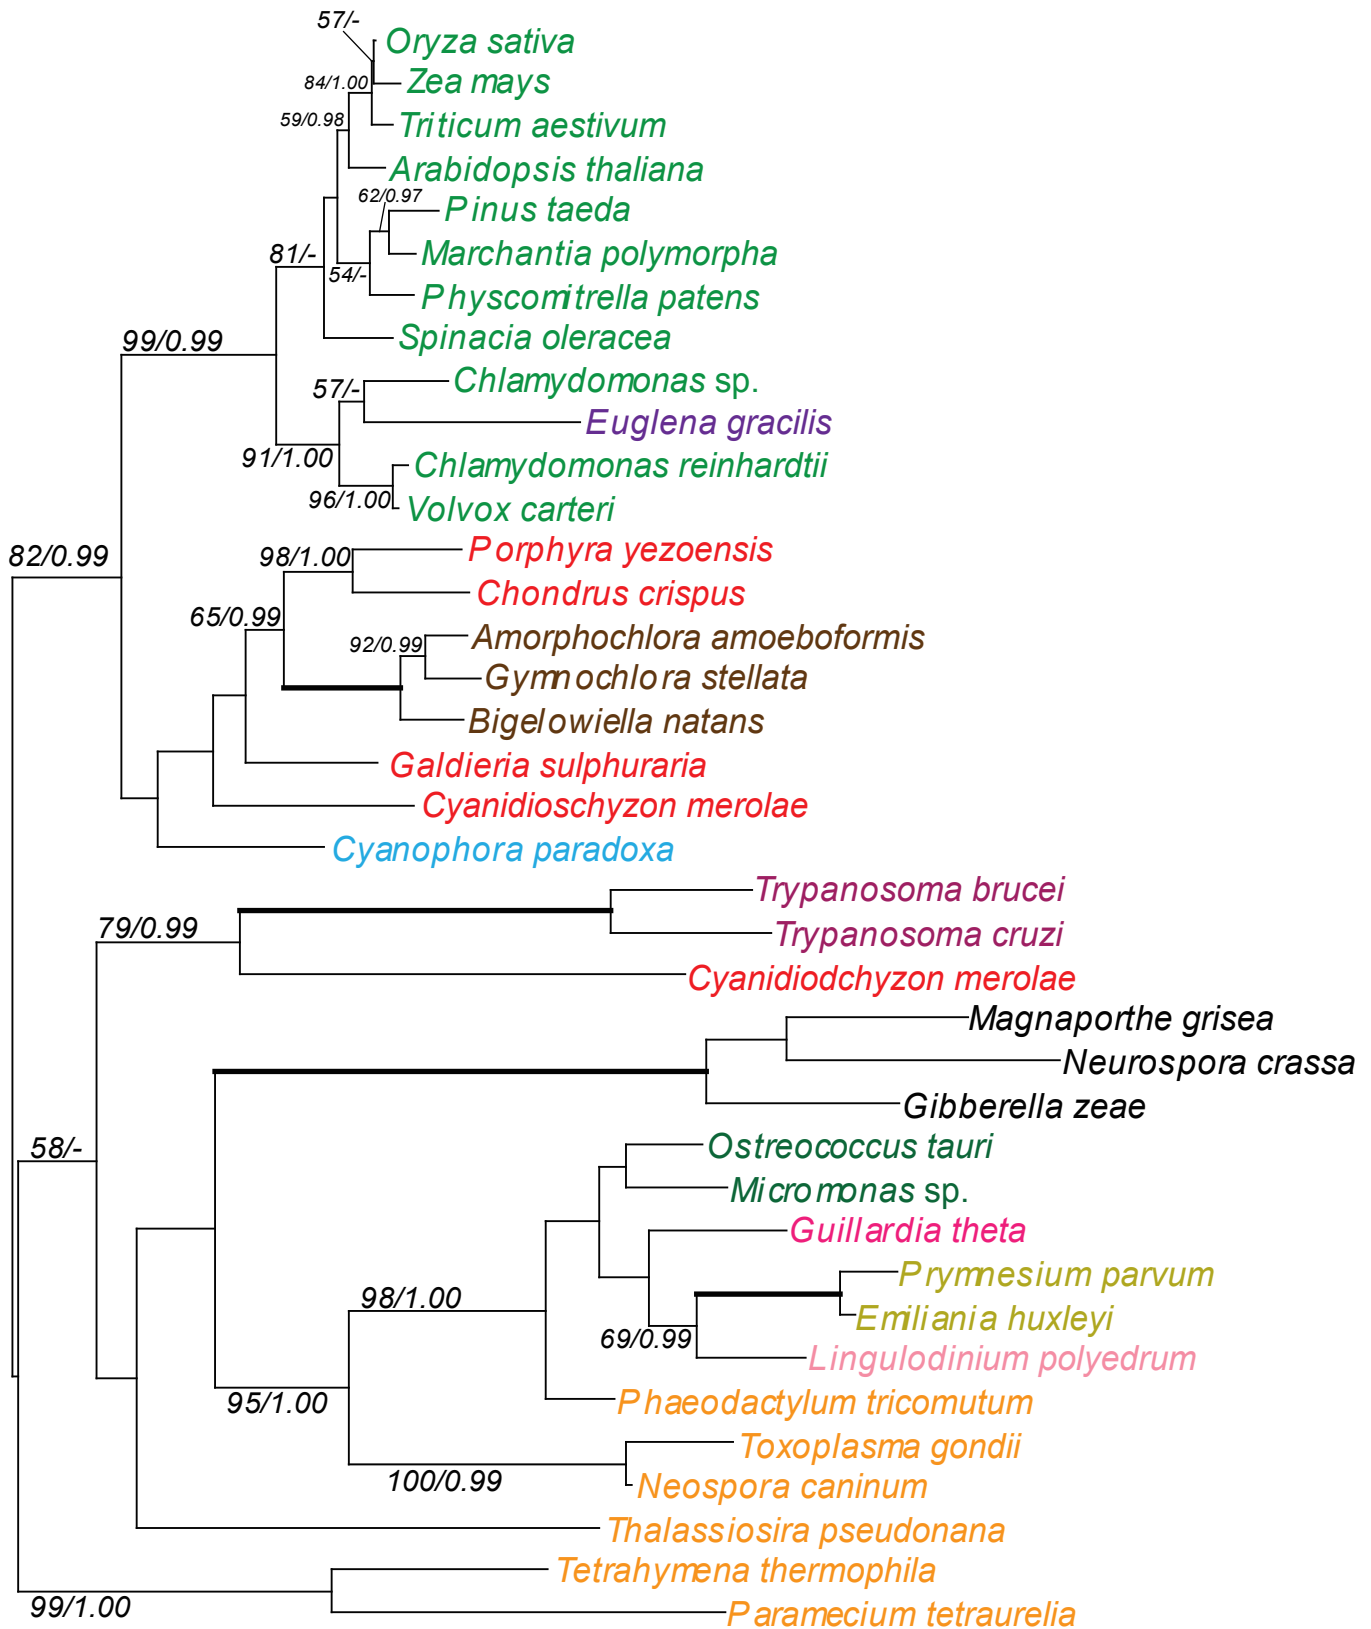

Figure S9 SBP
