# Supplementary material for: Phylogenomic Analysis of “Red” Genes from Two Divergent Species of the “Green” Secondary Phototrophs, the Chlorarachniophytes, Suggests Multiple Horizontal Gene Transfers from the Red Lineage before the Divergence of Extant Chlorarachniophytes
Source: PubMed Central journal article supplement (PMC4074131; doi:10.1371/journal.pone.0101158), 2014-06-27
Supplement: pone.0101158.s006.pdf [file pone.0101158.s006.pdf]

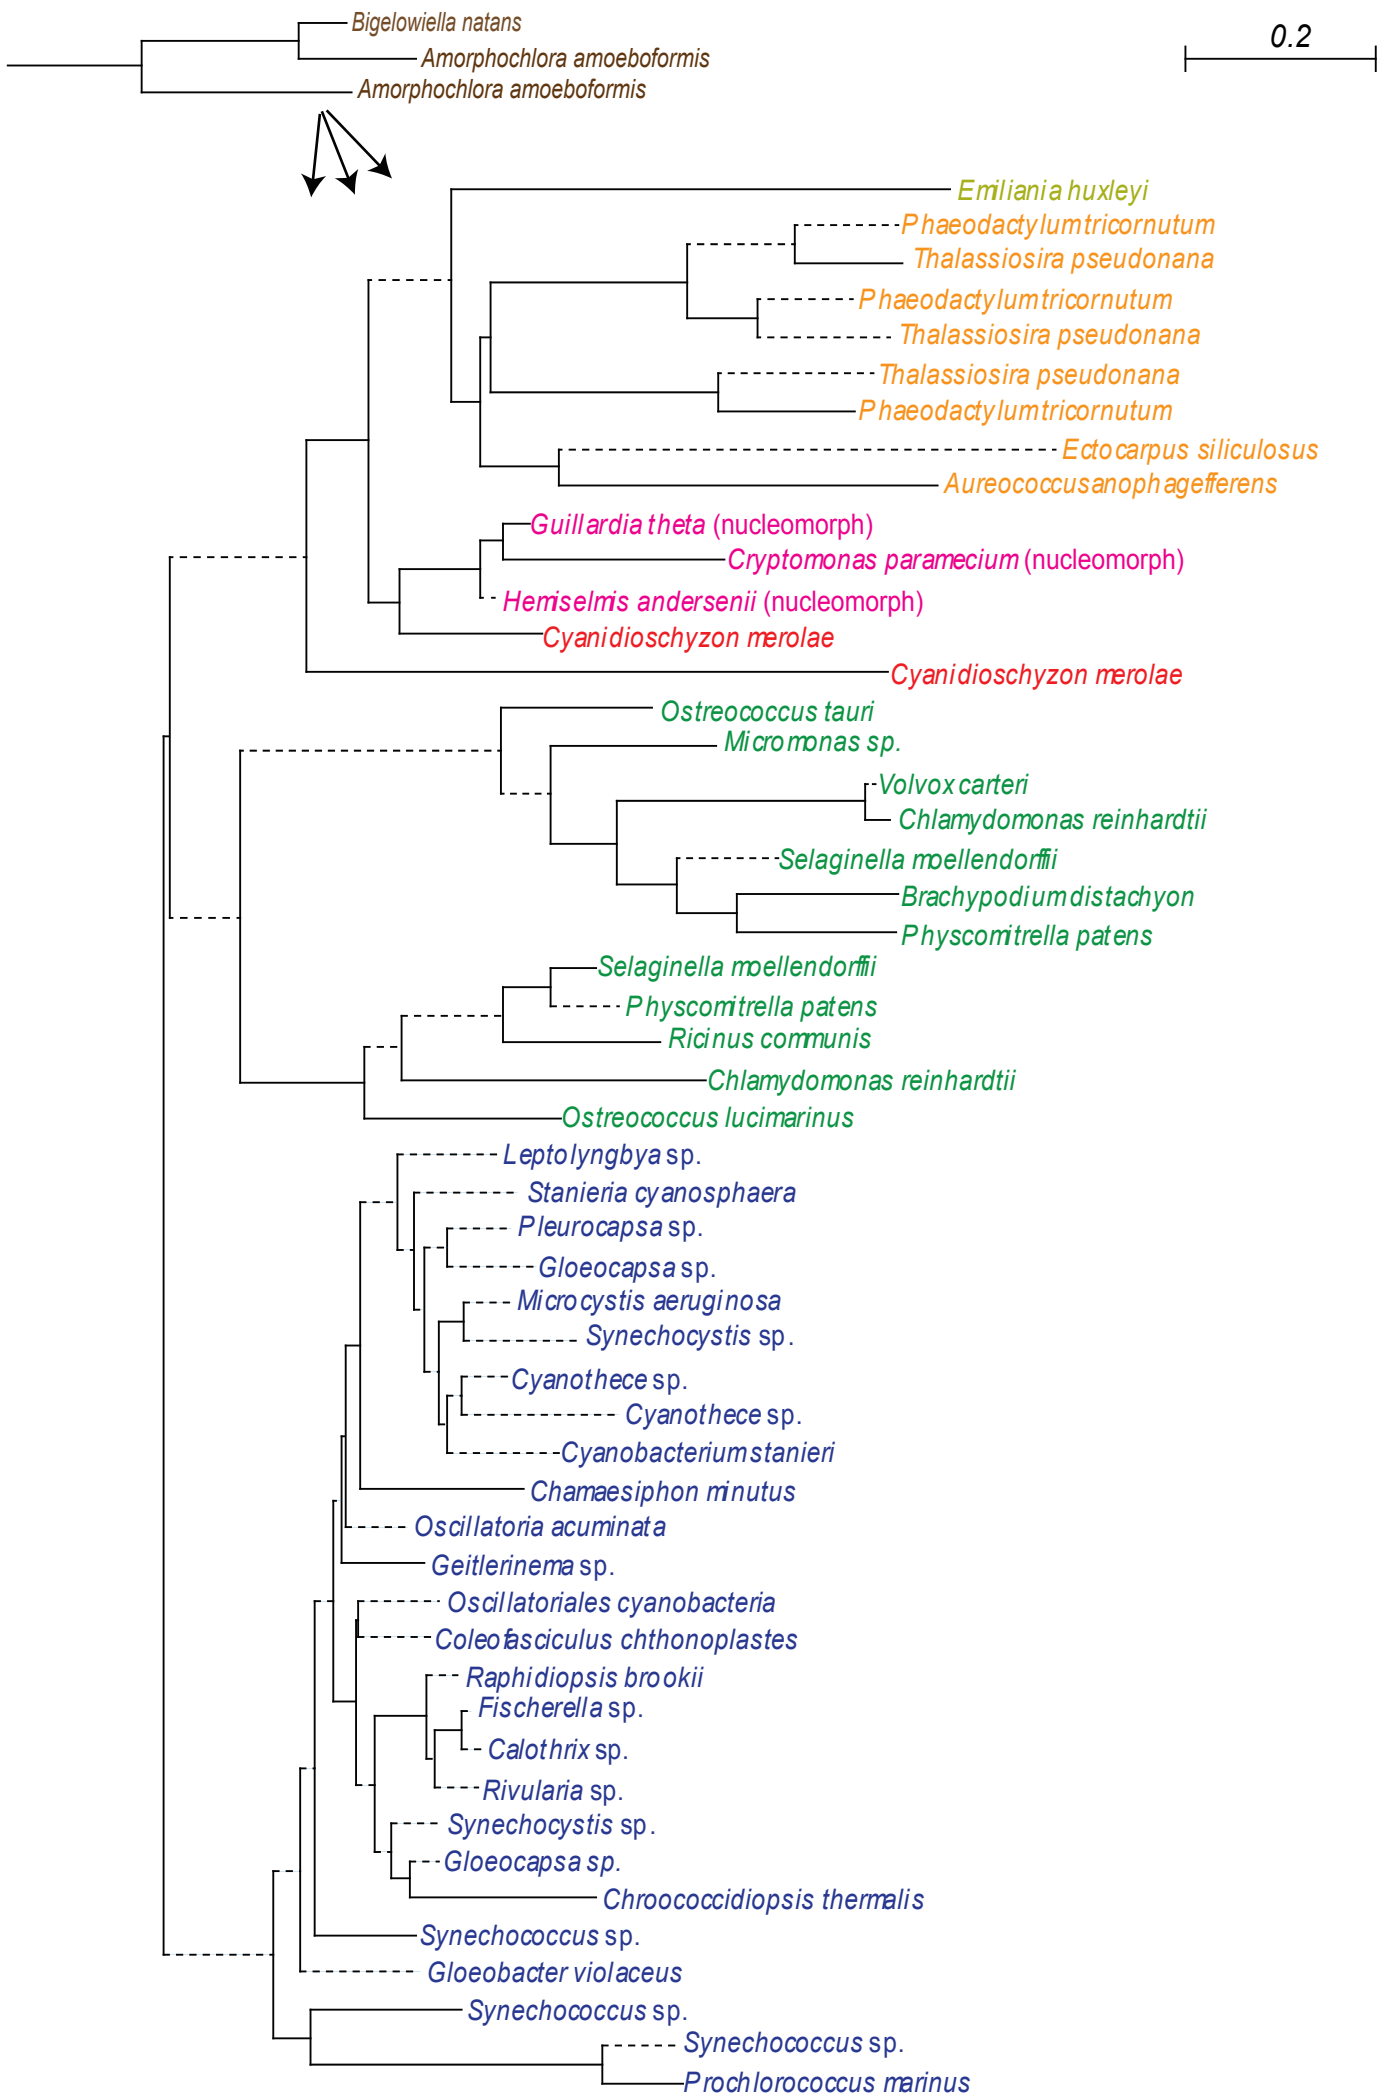

Figure S10 PDP/FtsZ

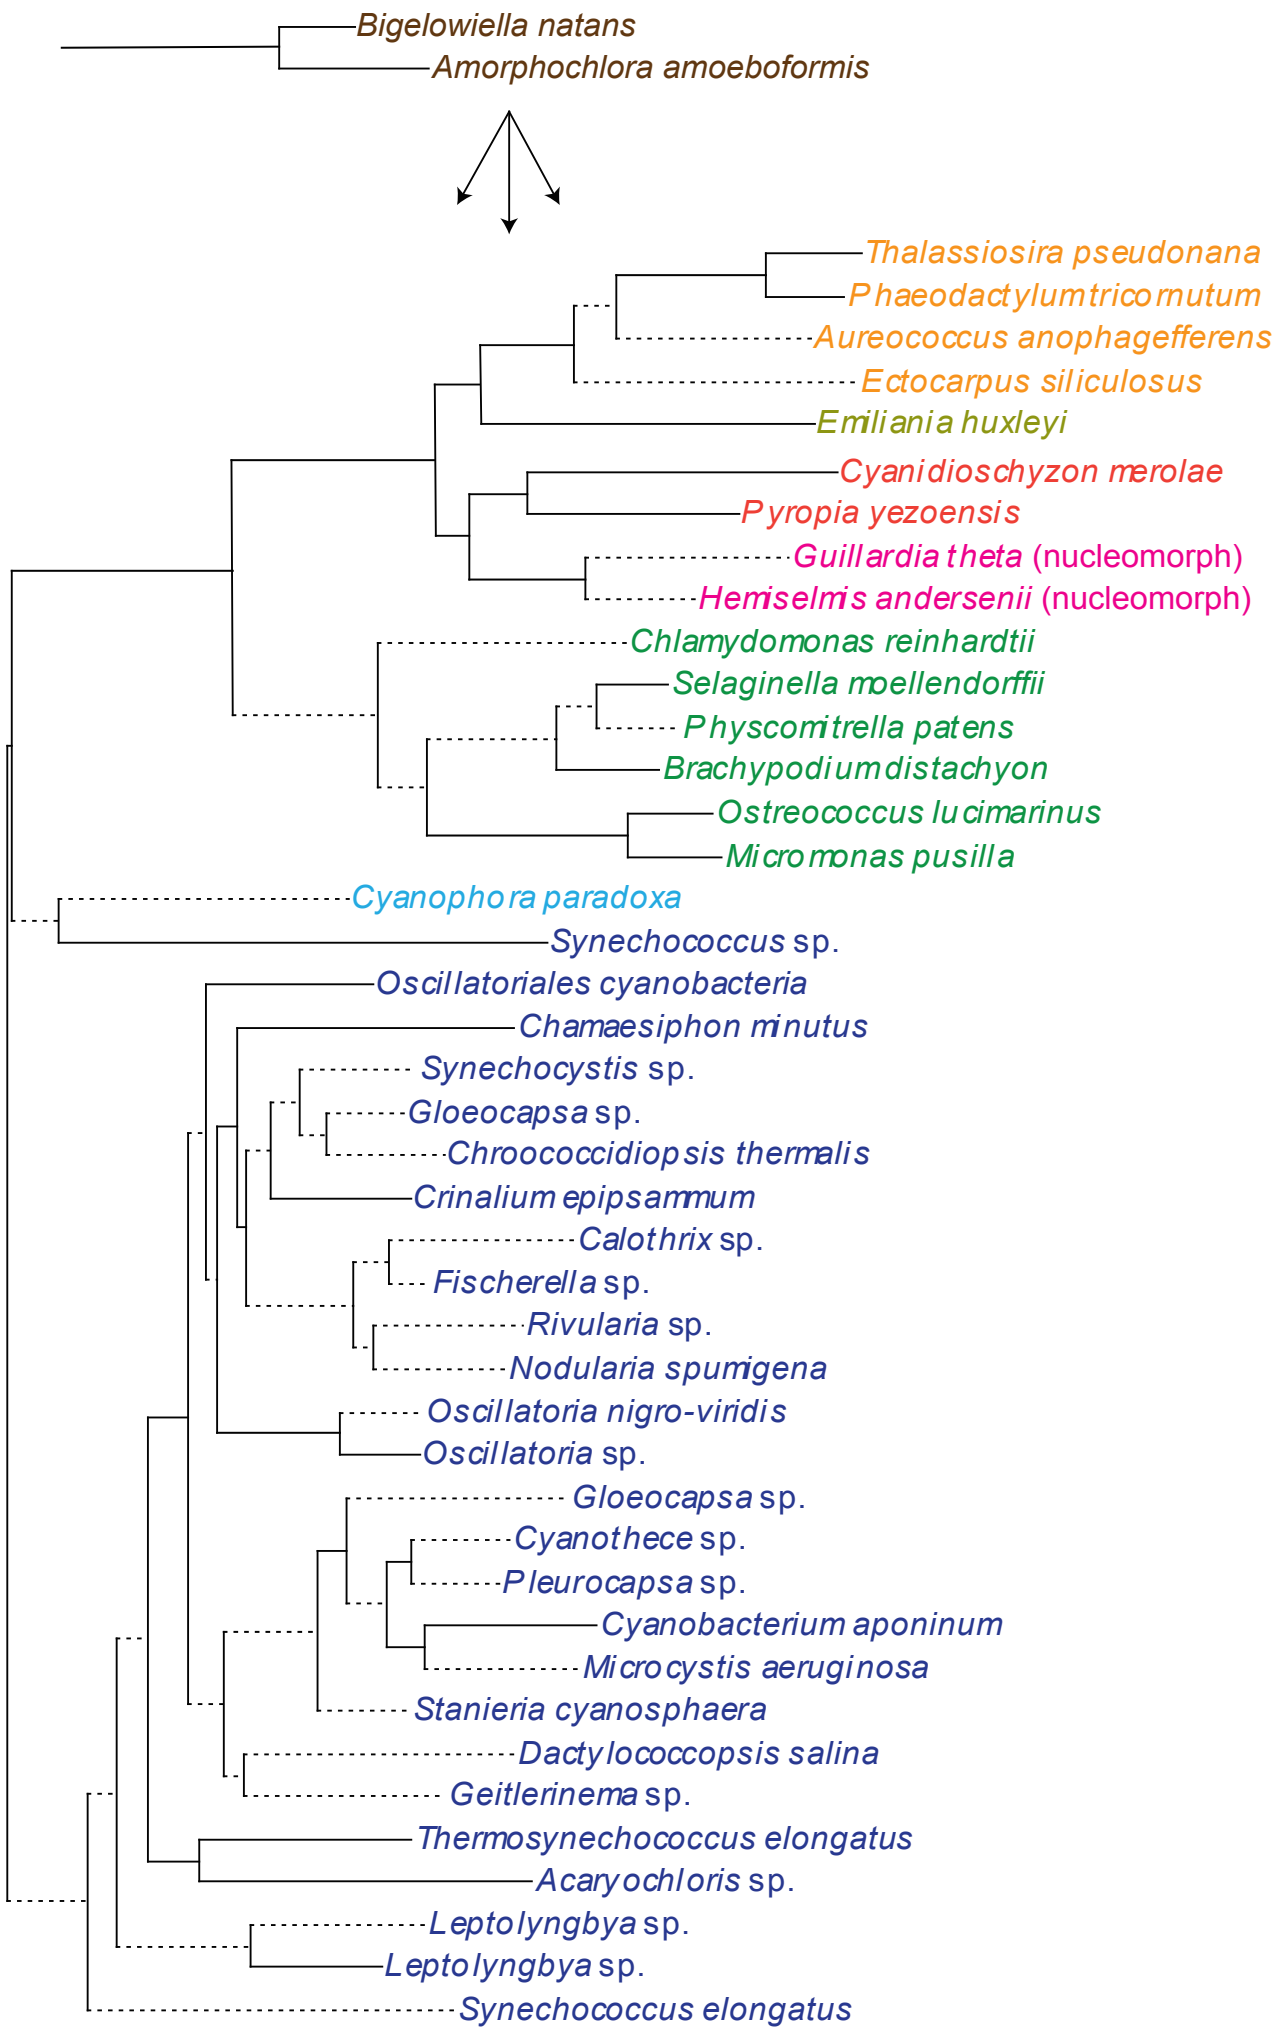

Figure S11 PS2SAF

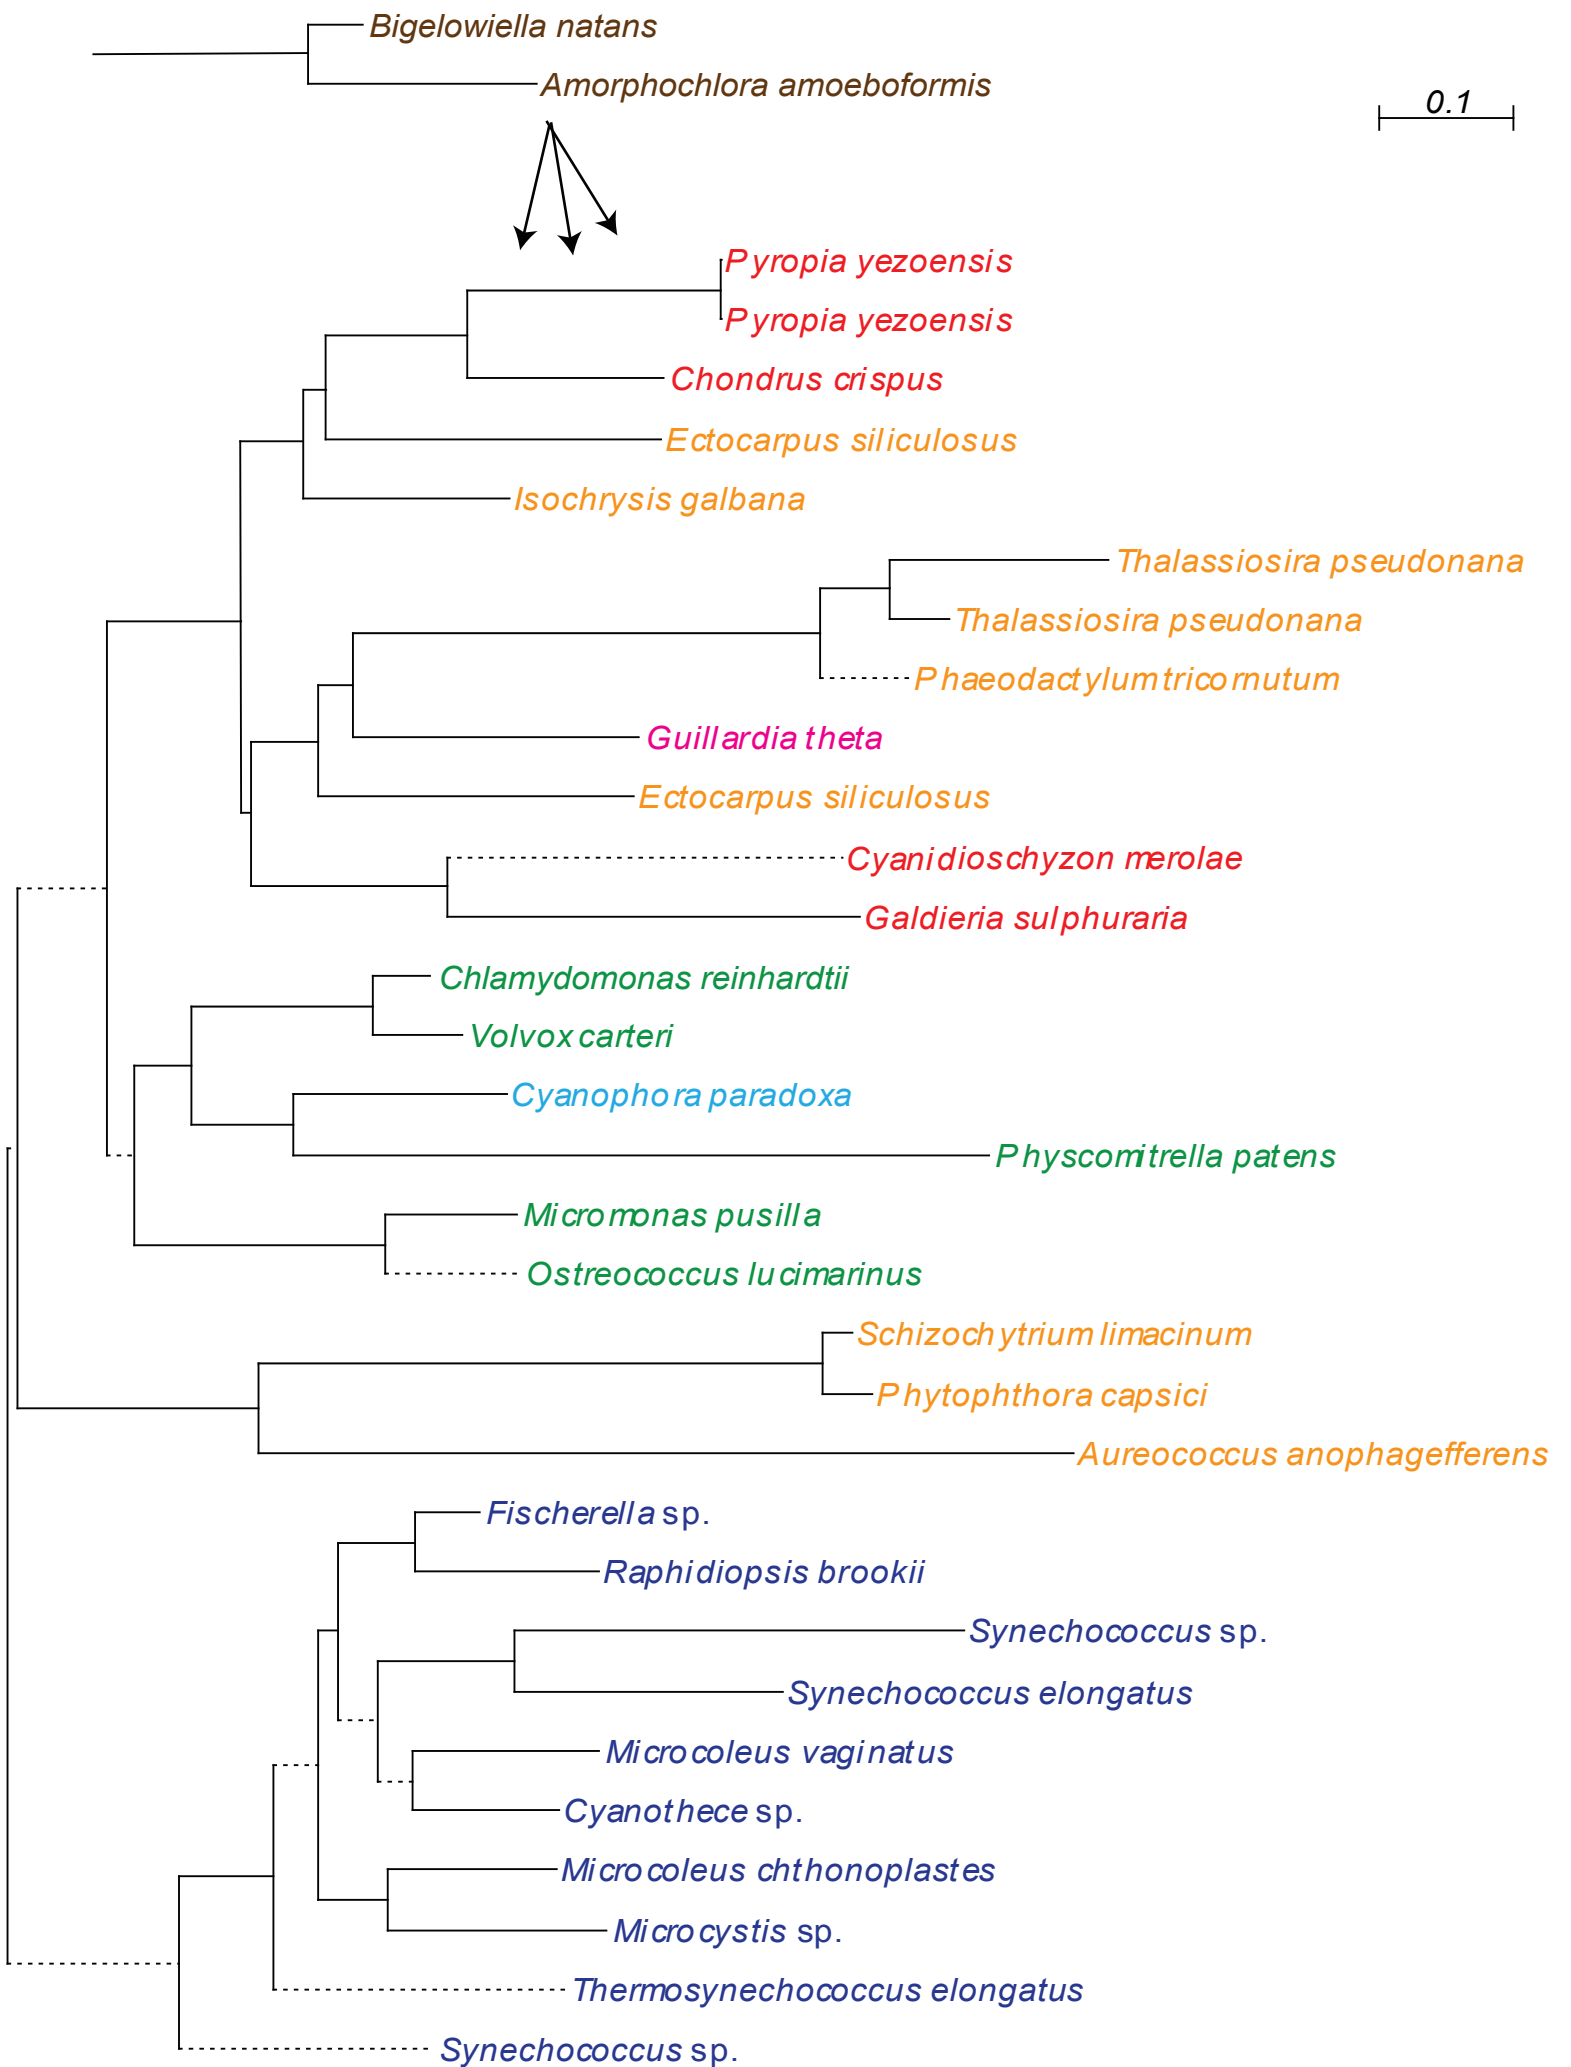

Figure S12 PGK

*Bigelwiella natans*

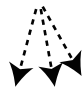

0.2

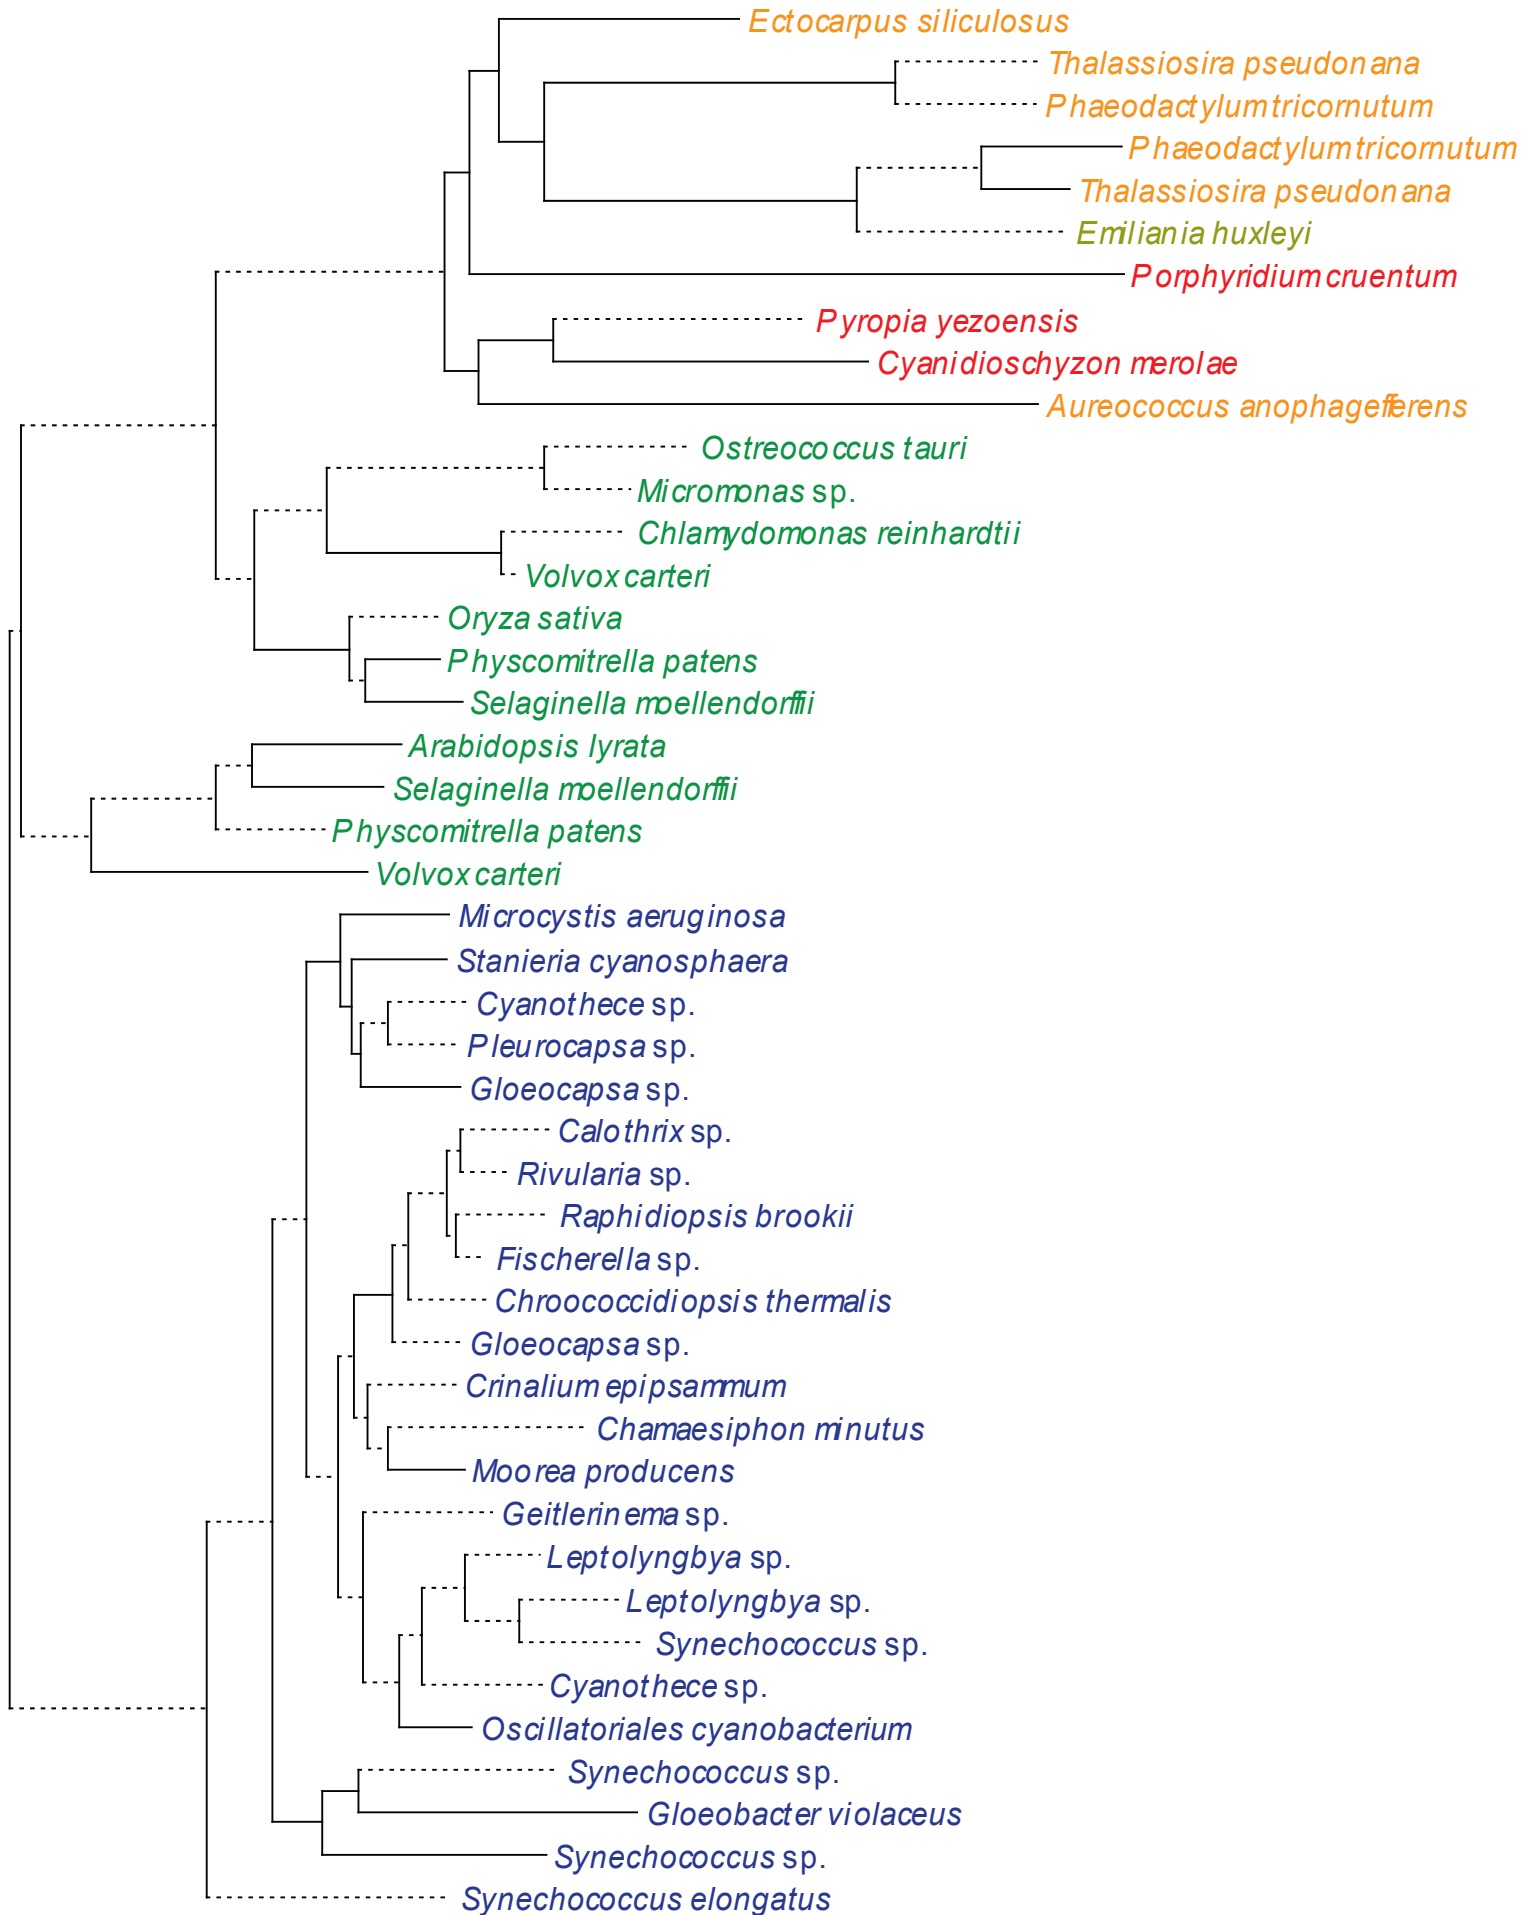

Figure S13 ABC

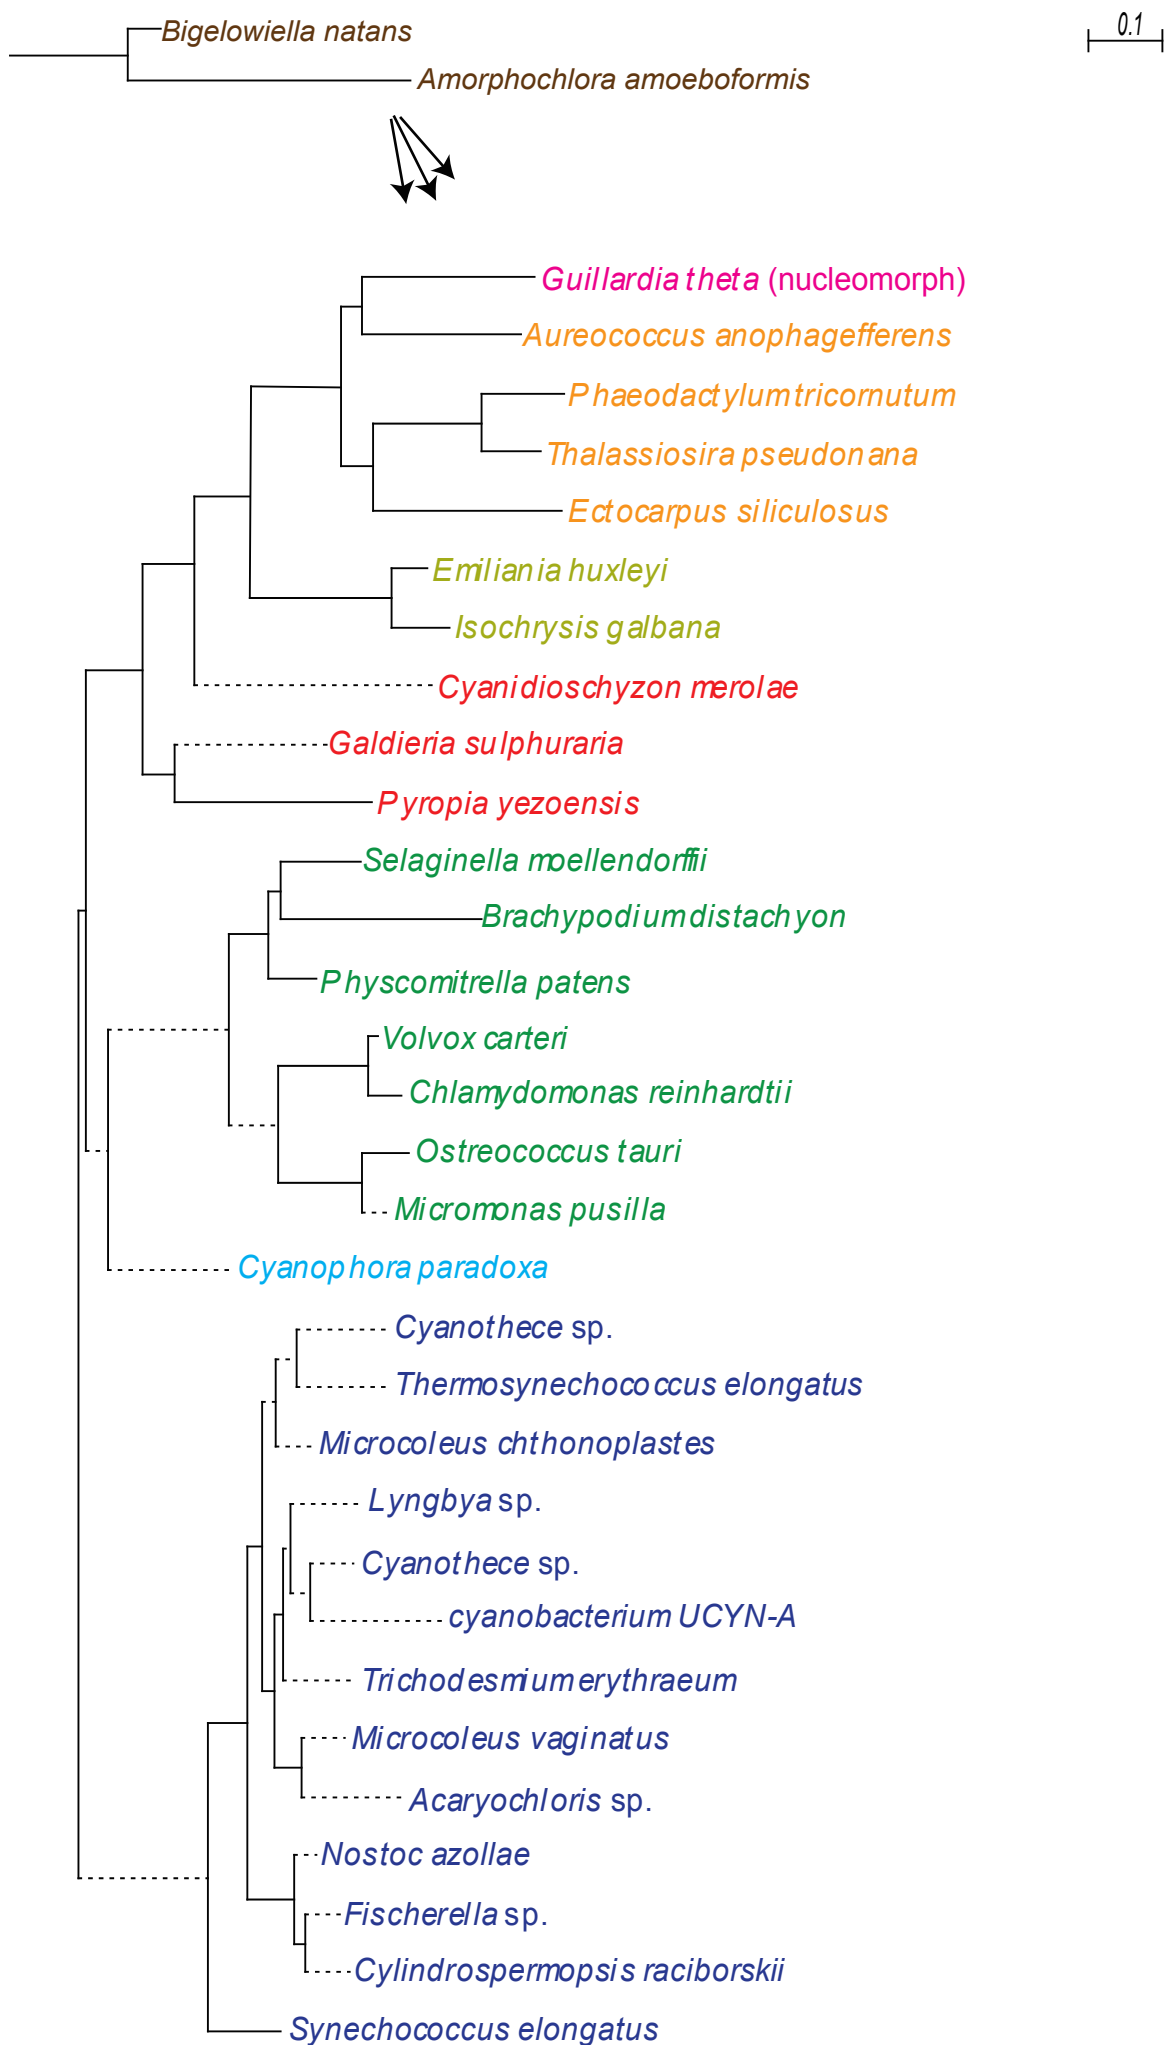

Figure S14 GGR

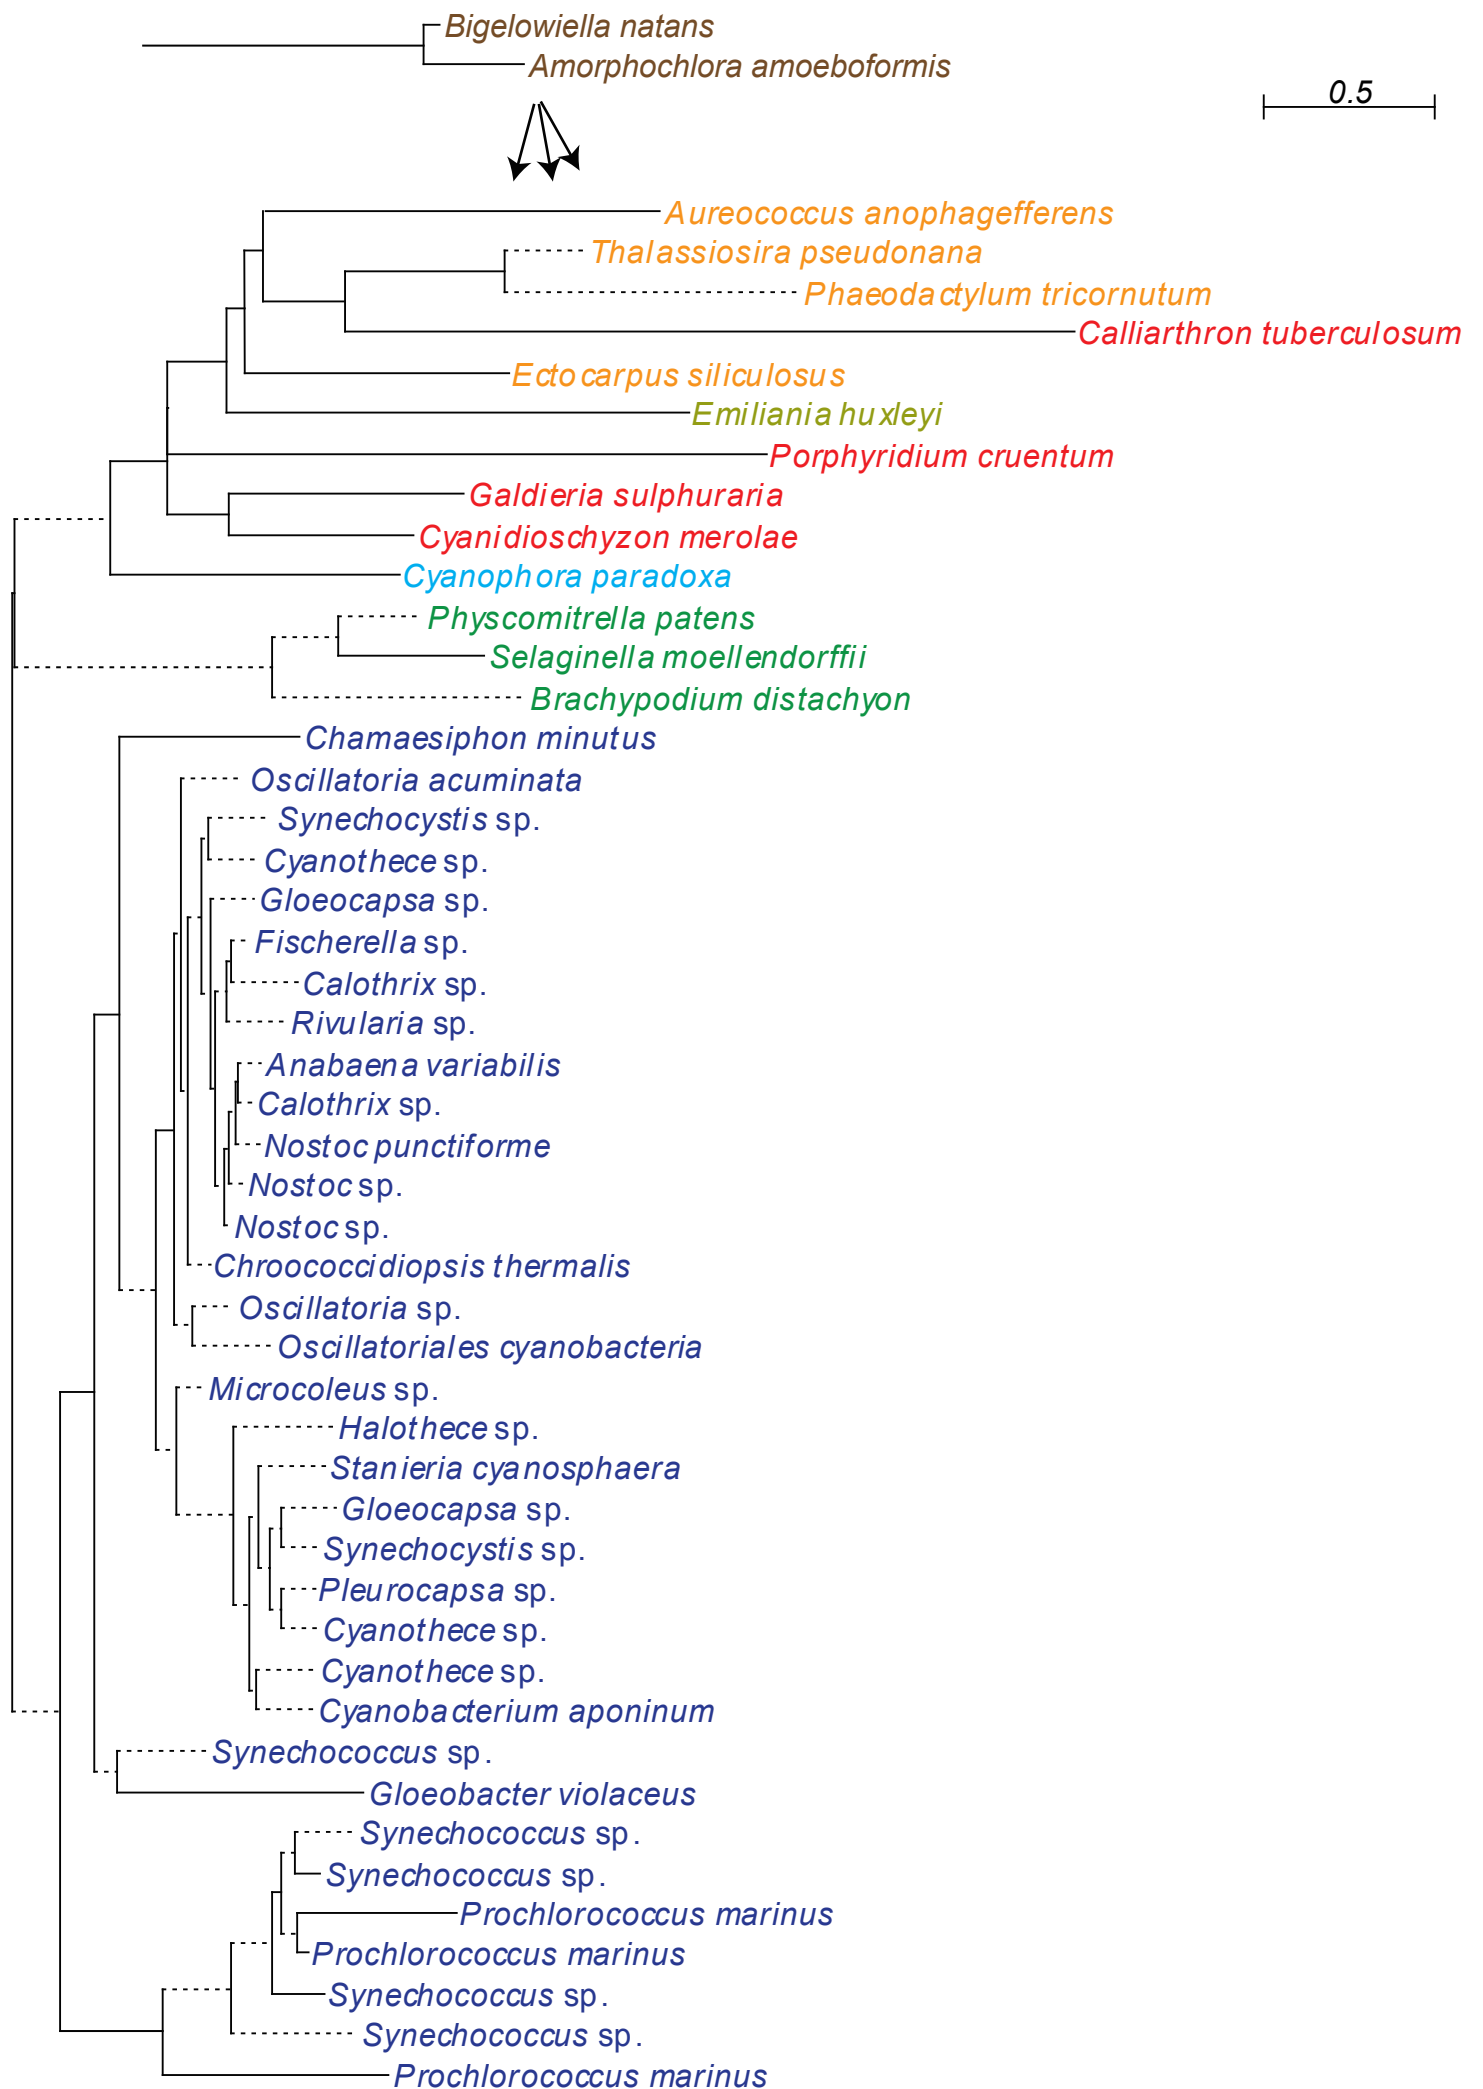

Figure S15 RPS22

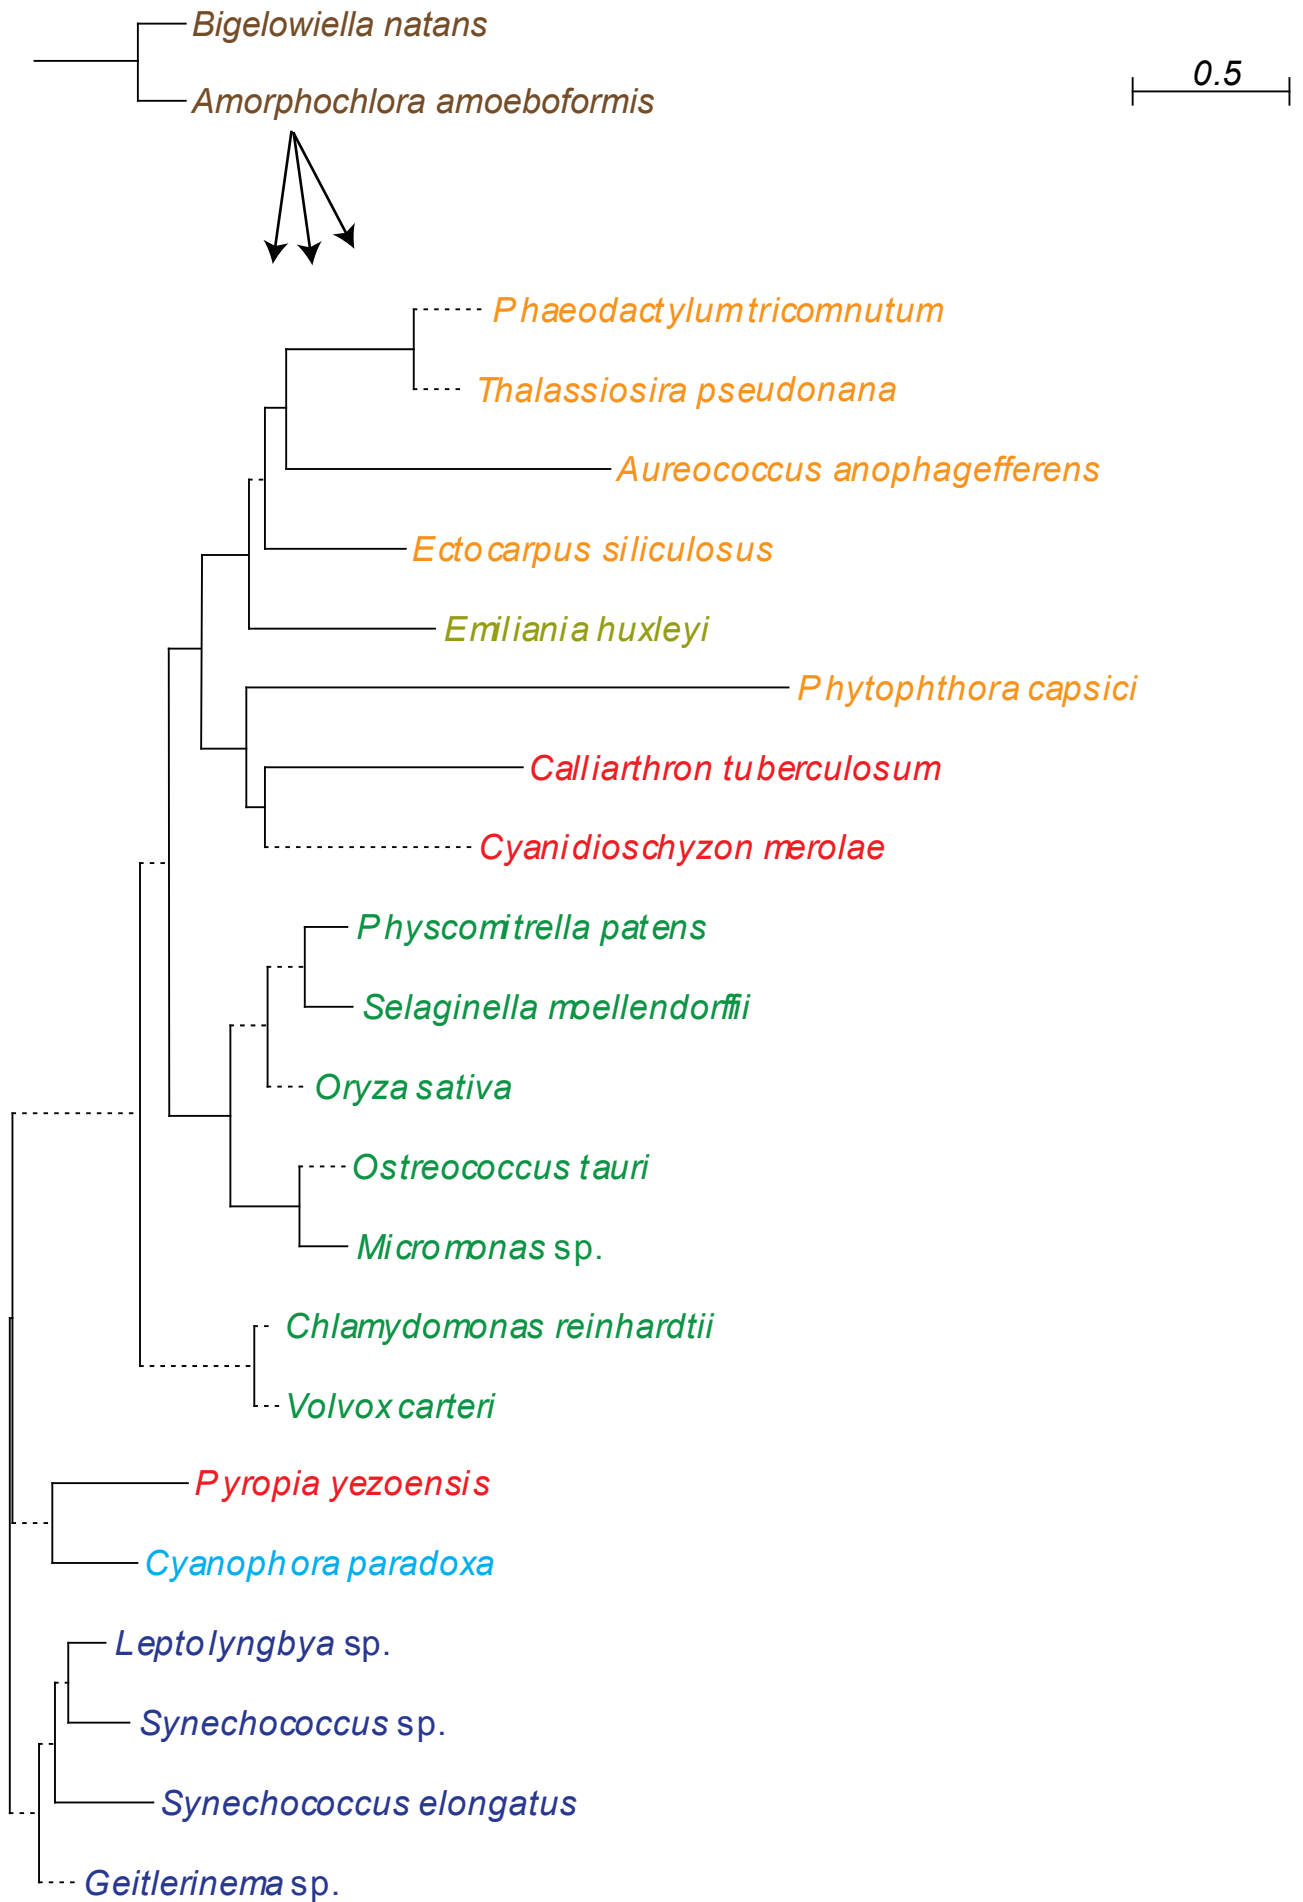

Figure S16 RNABP

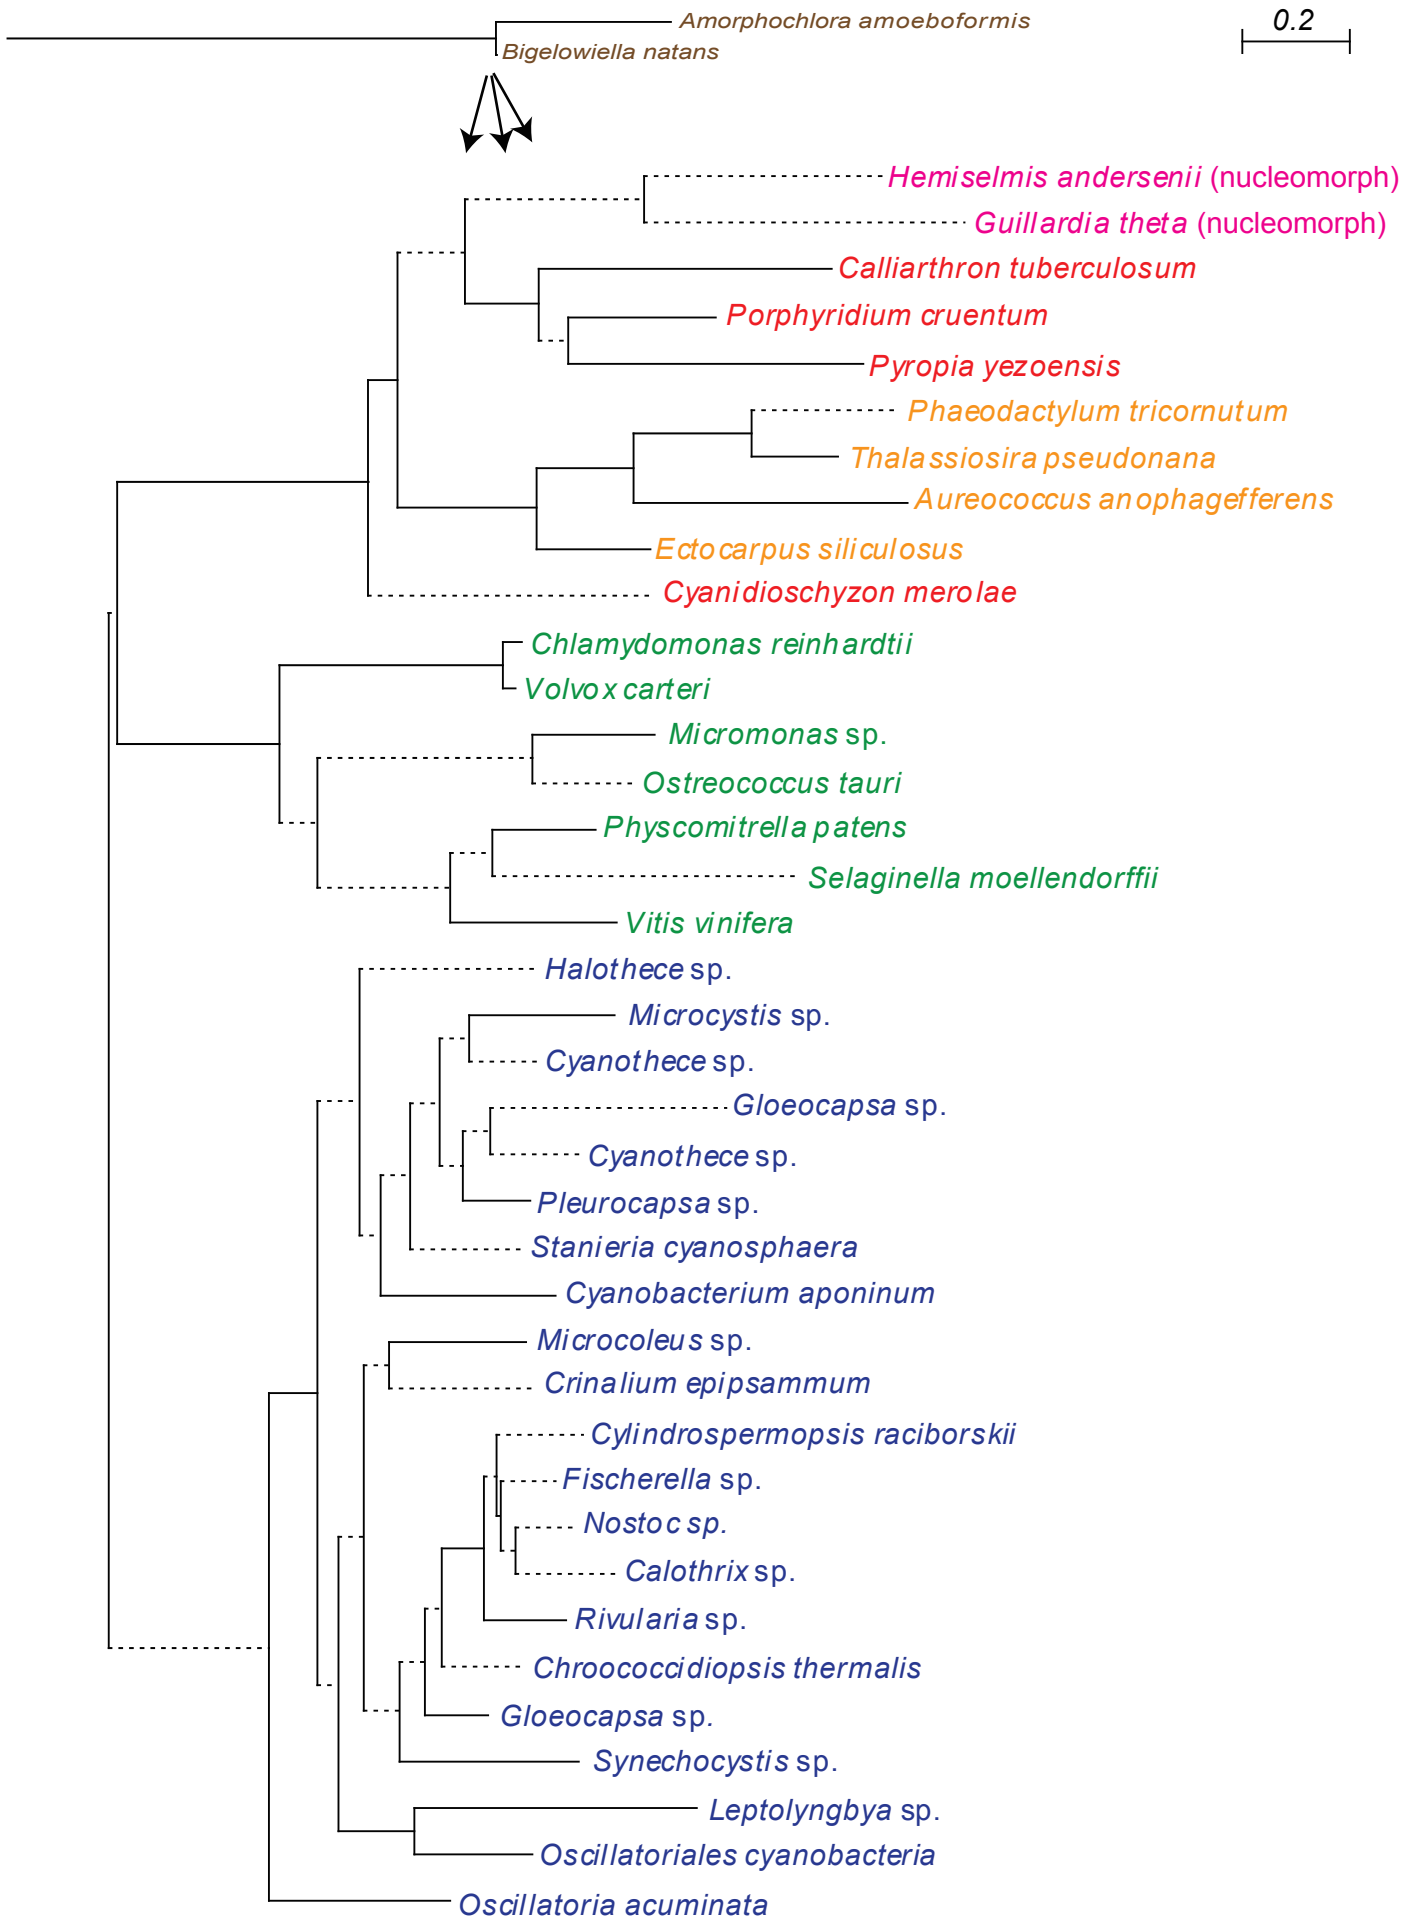

Figure S17 HP



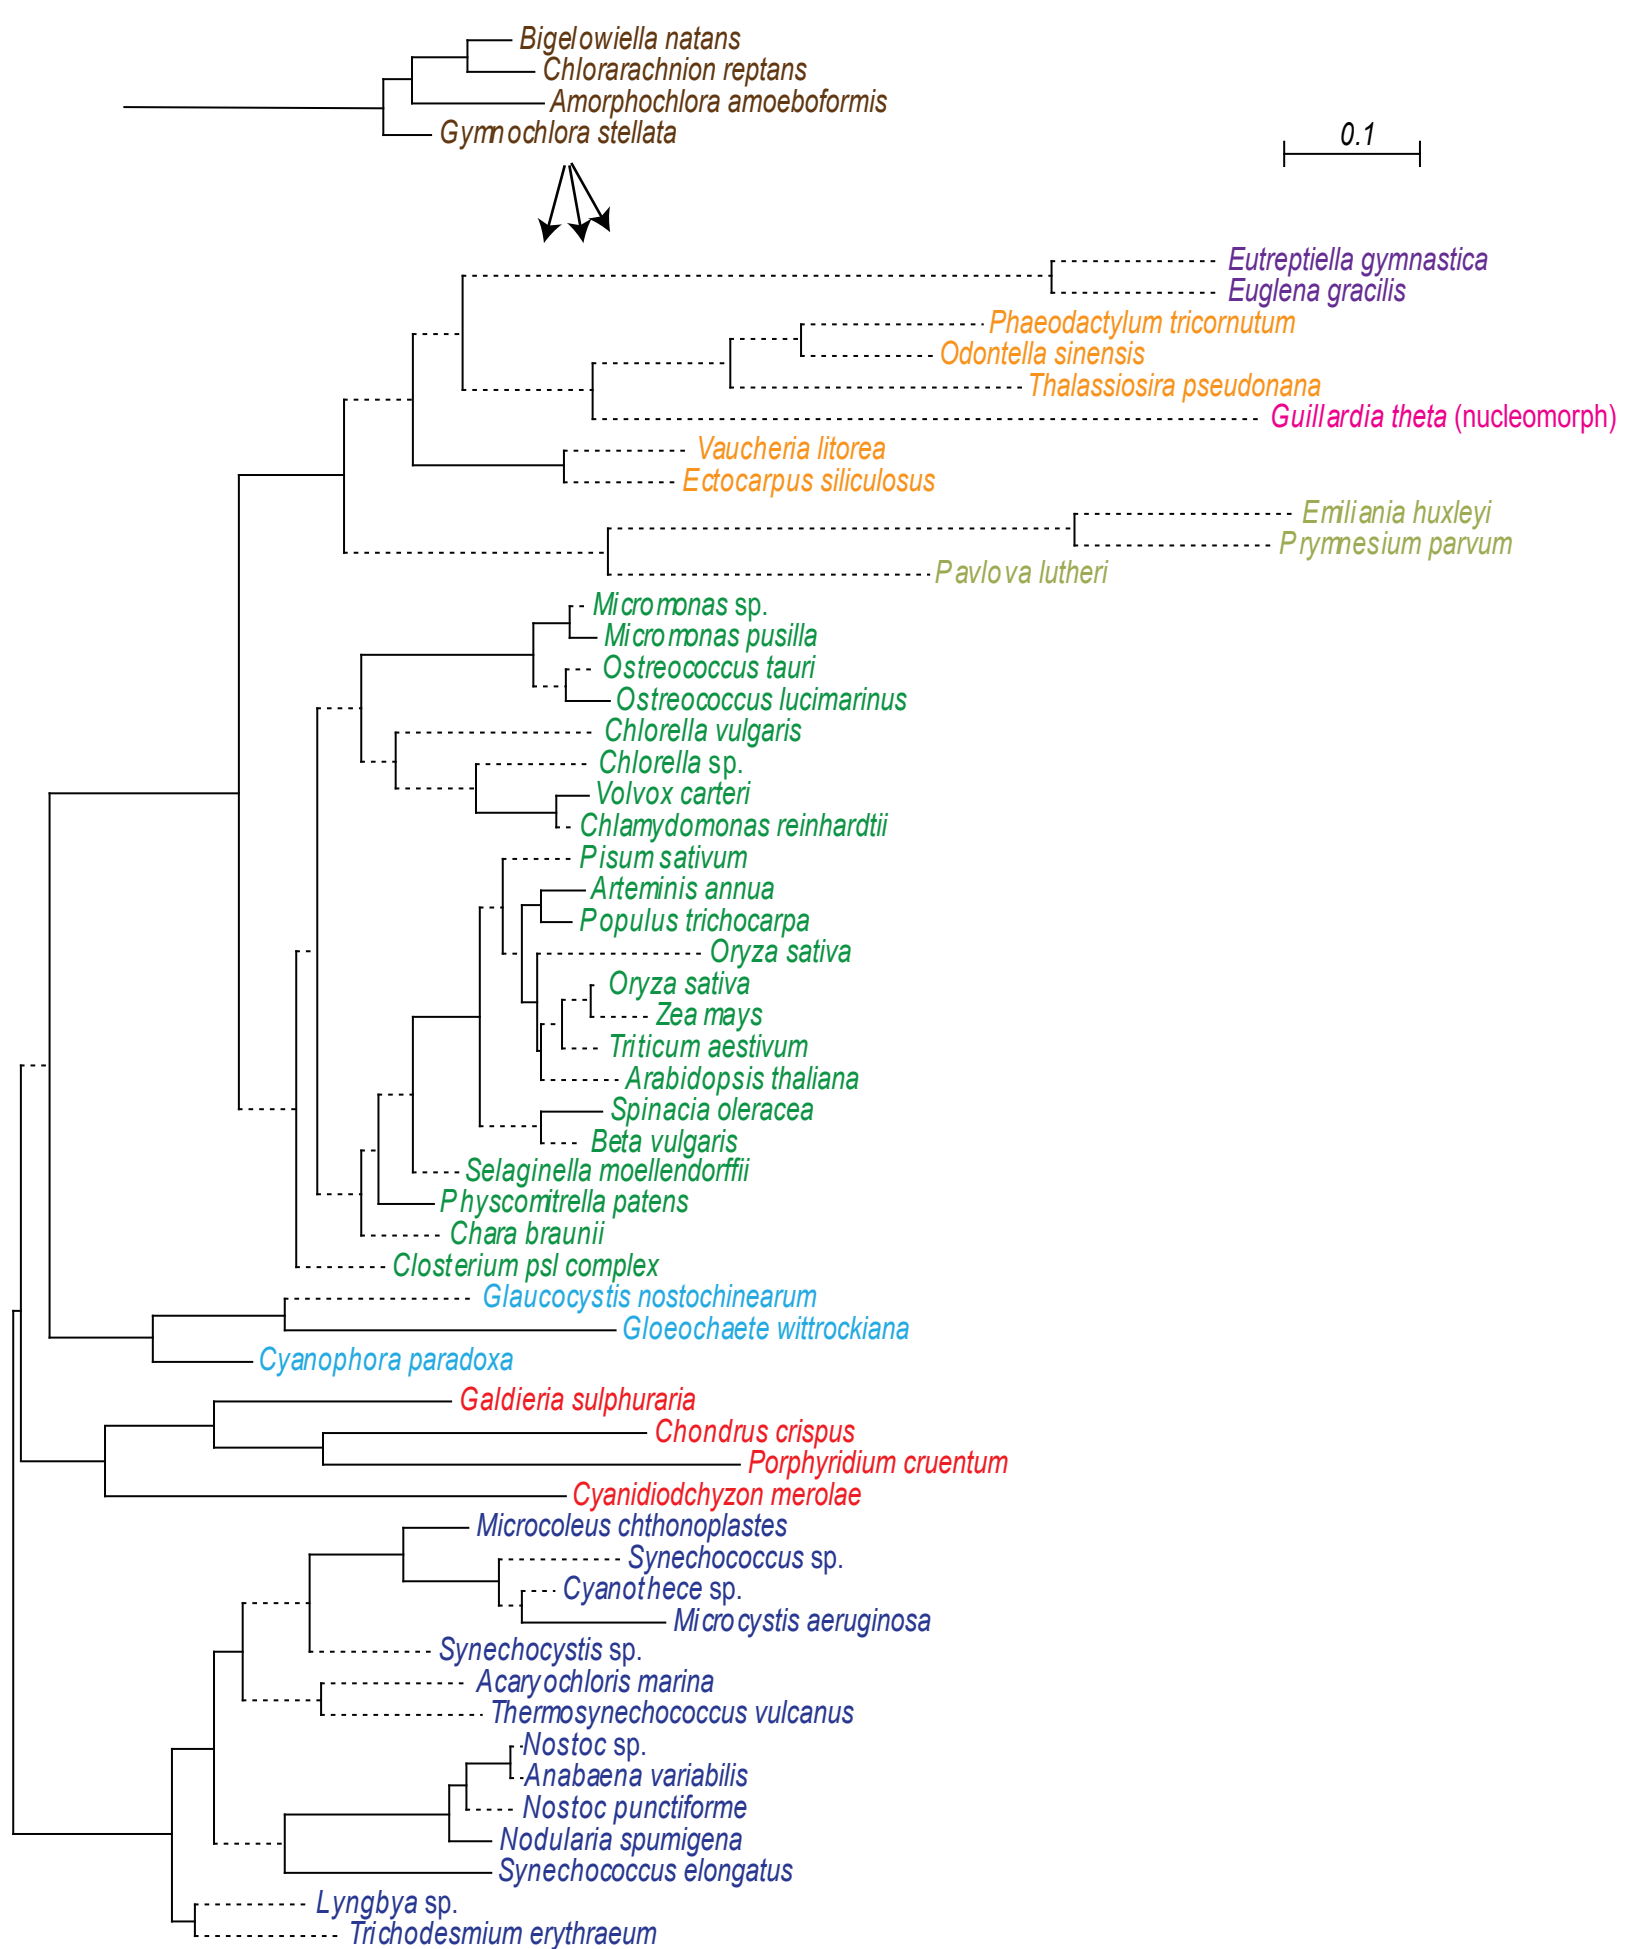

Figure S18 PRK
